# Supplementary material for: Dynein-2 intermediate chains play crucial but distinct roles in primary cilia formation and function
Source: eLife journal article supplement (doi:10.7554/elife.39655), 2018-10-15
Supplement: supp [file elife-39655-supp-v2.zip]

Archive with 7 entries (7 files):
- elife_poa_e39655_Figure_9_figure_supplement_1.pdf
- elife_poa_e39655_Supplementary_file_1.xlsx
- elife_poa_e39655_Figure_1_figure_supplement_1.pdf
- elife_poa_e39655_Figure_1_figure_supplement_2.pdf
- elife_poa_e39655_Figure_7_figure_supplement_1.pdf
- elife_poa_e39655_Figure_8_figure_supplement_1.pdf
- elife_poa_e39655_Transparent_Reporting_File.pdf
