# Supplementary material for: Dynein-2 intermediate chains play crucial but distinct roles in primary cilia formation and function
Source: eLife journal article supplement (doi:10.7554/elife.39655), 2018-10-15
Supplement: supp [file elife-39655-supp-v2.zip › elife_poa_e39655_Figure_1_figure_supplement_1.pdf]

Figure 1-Figure Supplement 1

A

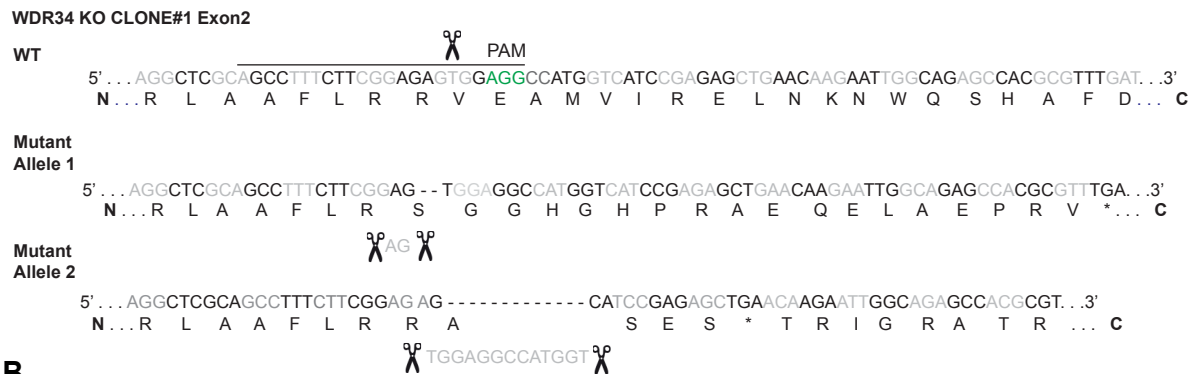

B

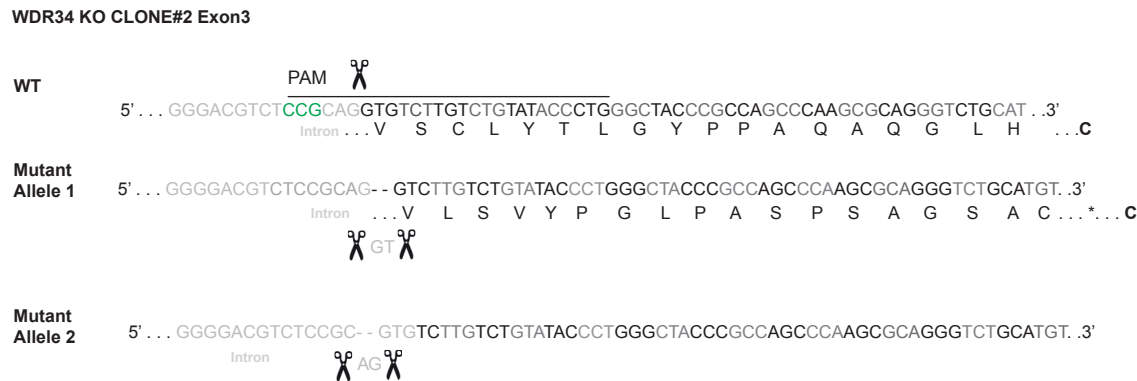

C

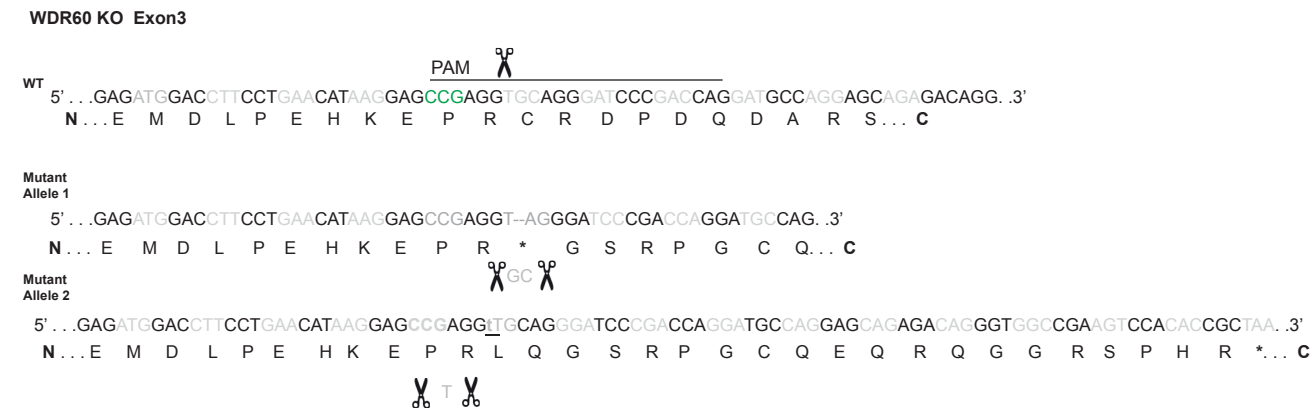

D

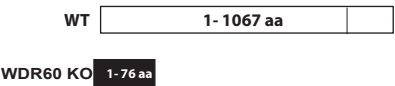

E

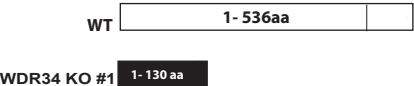

\* = Stop codon  
Underlined = inserted base (lowercase)  
Dashes = missing bases
