# Supplementary material for: Dynein-2 intermediate chains play crucial but distinct roles in primary cilia formation and function
Source: eLife journal article supplement (doi:10.7554/elife.39655), 2018-10-15
Supplement: supp [file elife-39655-supp-v2.zip › elife_poa_e39655_Supplementary_file_1.xlsx]

## Sheet:  HA-WDR60 Pull downs
			Abundances				Ratios
Accession	Description	Identified in # experiments	WT HA-GFP	WT HA-WDR60	WDR34KO HA-WDR60	Gene ID	WDR34KO HAWDR60/WT	WDR34KO HAWDR60/WT Log2
Q5VTL8	Pre-mRNA-splicing factor 38B OS=Homo sapiens GN=PRPF38B PE=1 SV=1	2	195.2	283.3	1764.6	PRPF38B	6.22873	2.63894
P55201	Peregrin OS=Homo sapiens GN=BRPF1 PE=1 SV=2	1	39.3	70.4	360.7	BRPF1	5.12358	2.35715
O60336	Mitogen-activated protein kinase-binding protein 1 OS=Homo sapiens GN=MAPKBP1 PE=1 SV=4	1	29.8	119.5	513.6	MAPKBP1	4.29791	2.10363
A0A024R5H0	Barrier to autointegration factor 1, isoform CRA_a OS=Homo sapiens GN=BANF1 PE=4 SV=1	2	101.1	609	2233.8	BANF1	3.66798	1.87499
A0A1B0GVU9	Glutamine--tRNA ligase (Fragment) OS=Homo sapiens GN=QARS PE=1 SV=1	1	67.4	118.9	357.7		3.00841	1.589
V9HVZ7	Epididymis luminal protein 176 OS=Homo sapiens GN=HEL-176 PE=2 SV=1	2	48.3	43.3	127.4	ACTG1	2.94226	1.55693
V9HWE1	Epididymis luminal protein 113 OS=Homo sapiens GN=HEL113 PE=2 SV=1	2	4682.3	9783.2	27457.5	VIM	2.8066	1.48882
P34741	Syndecan-2 OS=Homo sapiens GN=SDC2 PE=1 SV=2	2	32.9	105.6	291.7	SDC2	2.76231	1.46588
P16885	1-phosphatidylinositol 4,5-bisphosphate phosphodiesterase gamma-2 OS=Homo sapiens GN=PLCG2 PE=1 SV=4	1	45.1	53.2	146.2	PLCG2	2.74812	1.45845
P62805	Histone H4 OS=Homo sapiens GN=HIST1H4A PE=1 SV=2	2	1300.2	2593.2	7120.7	HIST1H4A; HIST1H4F; HIST1H4D; HIST1H4J; HIST2H4A; HIST2H4B; HIST1H4H; HIST1H4C; HIST4H4; HIST1H4E; HIST1H4I; HIST1H4B; HIST1H4K; HIST1H4L	2.74591	1.45729
P06899	Histone H2B type 1-J OS=Homo sapiens GN=HIST1H2BJ PE=1 SV=3	2	213.1	531.6	1414.8	HIST1H2BJ	2.6614	1.41219
P84243	Histone H3.3 OS=Homo sapiens GN=H3F3A PE=1 SV=2	2	406.6	754.8	1947.1	H3F3A; H3F3AP4; H3F3B	2.57962	1.36716
Q02539	Histone H1.1 OS=Homo sapiens GN=HIST1H1A PE=1 SV=3	1	20.9	132.8	341.7	HIST1H1A	2.57304	1.36348
B4DR52	Histone H2B OS=Homo sapiens PE=2 SV=1	1	1590.5	3435.1	8778.9	HIST2H2BF	2.55565	1.35369
E9PR17	CD59 glycoprotein OS=Homo sapiens GN=CD59 PE=1 SV=1	1	68.1	108.6	274		2.52302	1.33515
A0A0U1RRH7	Histone H2A OS=Homo sapiens GN=HIST1H3D PE=3 SV=1	2	91.4	244	613.2		2.51311	1.32948
B2RBH2	cDNA, FLJ95508, highly similar to Homo sapiens 5'-nucleotidase, ecto (CD73) (NT5E), mRNA OS=Homo sapiens PE=2 SV=1	2	374.1	656.5	1629.9	NT5E	2.48271	1.31192
P78539	Sushi repeat-containing protein SRPX OS=Homo sapiens GN=SRPX PE=1 SV=1	1	20.4	33.3	82.4	SRPX	2.47447	1.30712
P0C0S5	Histone H2A.Z OS=Homo sapiens GN=H2AFZ PE=1 SV=2	2	108.3	306	753.3	H2AFZ	2.46176	1.29969
B8ZX62	Plasminogen activator OS=Homo sapiens GN=PLAT PE=2 SV=1	2	209.6	650.9	1584.9	PLAT	2.43494	1.28388
Q9Y3E1	Hepatoma-derived growth factor-related protein 3 OS=Homo sapiens GN=HDGFL3 PE=1 SV=1	2	20.5	37.2	90.5	HDGFRP3; HDGFL3	2.4328	1.28262
P21817	Ryanodine receptor 1 OS=Homo sapiens GN=RYR1 PE=1 SV=3	1	110.8	101	242.5	RYR1	2.40099	1.26363
A0A0A0MRR7	U1 small nuclear ribonucleoprotein C OS=Homo sapiens GN=SNRPC PE=1 SV=1	2	79.8	313.6	749	SNRPC	2.38839	1.25604
Q5TEC6	Histone H3 OS=Homo sapiens GN=HIST2H3PS2 PE=1 SV=1	1	1209.6	2205.7	5256.1	HIST2H3PS2	2.38296	1.25276
Q5T6U8	High mobility group AT-hook 1 OS=Homo sapiens GN=HMGA1 PE=2 SV=1	2	96.8	370	867	HMGA1	2.34324	1.22851
Q9Y2R4	Probable ATP-dependent RNA helicase DDX52 OS=Homo sapiens GN=DDX52 PE=1 SV=3	1	31.6	91.4	214	DDX52	2.34136	1.22734
P16402	Histone H1.3 OS=Homo sapiens GN=HIST1H1D PE=1 SV=2	2	23.2	139.3	320.2	HIST1H1D	2.29864	1.20078
B2R5W2	Heterogeneous nuclear ribonucleoproteins C1/C2 OS=Homo sapiens GN=HNRNPC PE=1 SV=1	2	949.6	1777.5	4077.4	HNRNPC	2.2939	1.1978
A4D2Q0	Unc-84 homolog A (C. elegans) OS=Homo sapiens GN=UNC84A PE=4 SV=1	1	35.4	61.8	141.2	SUN1	2.28479	1.19206
Q92567	Protein FAM168A OS=Homo sapiens GN=FAM168A PE=1 SV=2	1	12.7	17.3	39.3	FAM168A	2.27168	1.18376
P02545	Prelamin-A/C OS=Homo sapiens GN=LMNA PE=1 SV=1	2	2241.1	4837.8	10940.5	LMNA	2.26146	1.17726
Q9UKV8	Protein argonaute-2 OS=Homo sapiens GN=AGO2 PE=1 SV=3	2	1717.8	2638.5	5945.1	AGO2; EIF2C2	2.25321	1.17198
P17096	High mobility group protein HMG-I/HMG-Y OS=Homo sapiens GN=HMGA1 PE=1 SV=3	2	522.5	2667.5	5976.3	HMGA1	2.24041	1.16376
P62318	Small nuclear ribonucleoprotein Sm D3 OS=Homo sapiens GN=SNRPD3 PE=1 SV=1	2	265.6	589.1	1302.6	SNRPD3	2.21117	1.14481
Q9ULX6	A-kinase anchor protein 8-like OS=Homo sapiens GN=AKAP8L PE=1 SV=3	1	171.4	378.7	833.5	AKAP8L	2.20095	1.13813
O75326	Semaphorin-7A OS=Homo sapiens GN=SEMA7A PE=1 SV=1	1	8	13.1	28.8	SEMA7A	2.19847	1.1365
Q16629	Serine/arginine-rich splicing factor 7 OS=Homo sapiens GN=SRSF7 PE=1 SV=1	2	23.5	104.4	229.5	SRSF7	2.19828	1.13637
A0A023T6R1	Mago nashi protein OS=Homo sapiens GN=FLJ10292 PE=2 SV=1	2	92.5	153.7	336.9	MAGOHB	2.19193	1.1322
Q03252	Lamin-B2 OS=Homo sapiens GN=LMNB2 PE=1 SV=4	2	183.5	402.5	879.8	LMNB2	2.18584	1.12819
P05204	Non-histone chromosomal protein HMG-17 OS=Homo sapiens GN=HMGN2 PE=1 SV=3	2	239.8	321	694	HMGN2	2.16199	1.11236
O43823	A-kinase anchor protein 8 OS=Homo sapiens GN=AKAP8 PE=1 SV=1	2	228	414.5	892.6	AKAP8	2.15344	1.10664
P08621	U1 small nuclear ribonucleoprotein 70 kDa OS=Homo sapiens GN=SNRNP70 PE=1 SV=2	2	1425.8	3333.3	7112.3	SNRNP70	2.13371	1.09337
A0A0S2Z5C3	PAK1 interacting protein 1 isoform 1 (Fragment) OS=Homo sapiens GN=PAK1IP1 PE=2 SV=1	1	16.3	58.3	124.2	PAK1IP1	2.13036	1.0911
Q9HCD5	Nuclear receptor coactivator 5 OS=Homo sapiens GN=NCOA5 PE=1 SV=2	1	17.8	19.2	40.9	NCOA5	2.13021	1.09099
P20700	Lamin-B1 OS=Homo sapiens GN=LMNB1 PE=1 SV=2	2	948.4	1711.8	3636.3	LMNB1	2.12426	1.08696
Q9GZL7	Ribosome biogenesis protein WDR12 OS=Homo sapiens GN=WDR12 PE=1 SV=2	1	23.1	39.6	84.1	WDR12	2.12374	1.08661
O00567	Nucleolar protein 56 OS=Homo sapiens GN=NOP56 PE=1 SV=4	2	237.2	673.6	1425.7	NOP56	2.11654	1.08171
O75367	Core histone macro-H2A.1 OS=Homo sapiens GN=H2AFY PE=1 SV=4	2	229.9	588.2	1240.7	H2AFY	2.10932	1.07678
A0A024R056	Guanine nucleotide binding protein (G protein), beta polypeptide 1, isoform CRA_a OS=Homo sapiens GN=GNB1 PE=2 SV=1	2	102.2	112.8	237.3	GNB1	2.10372	1.07295
A8K329	cDNA FLJ76656, highly similar to Homo sapiens scaffold attachment factor B (SAFB), mRNA OS=Homo sapiens PE=2 SV=1	1	299.8	550.5	1157.5	SAFB	2.10263	1.0722
P62314	Small nuclear ribonucleoprotein Sm D1 OS=Homo sapiens GN=SNRPD1 PE=1 SV=1	2	129.5	227.6	476.6	SNRPD1	2.09402	1.06628
O15050	TPR and ankyrin repeat-containing protein 1 OS=Homo sapiens GN=TRANK1 PE=2 SV=4	1	36	79.2	165.3	TRANK1	2.08712	1.06151
Q53EW4	Myotubularin-related protein 9 variant (Fragment) OS=Homo sapiens PE=2 SV=1	2	18.4	28.9	60.2	MTMR9	2.08304	1.05869
O75525	KH domain-containing, RNA-binding, signal transduction-associated protein 3 OS=Homo sapiens GN=KHDRBS3 PE=1 SV=1	2	37	93.2	193.8	KHDRBS3	2.0794	1.05617
Q15182	Small nuclear ribonucleoprotein-associated protein OS=Homo sapiens GN=SNRPB PE=2 SV=1	2	574.5	1194.2	2477.9	SNRPB	2.07495	1.05307
A8MWD9	Putative small nuclear ribonucleoprotein G-like protein 15 OS=Homo sapiens GN=SNRPGP15 PE=5 SV=2	2	148.9	469.8	971.8	LOC100130932; SNRPGP15	2.06854	1.04861
B7Z7G8	cDNA FLJ53530 OS=Homo sapiens PE=2 SV=1	1	3.2	14.3	29.5	LOC100287931	2.06294	1.0447
Q02040	A-kinase anchor protein 17A OS=Homo sapiens GN=AKAP17A PE=1 SV=2	1	76.1	165.5	339.1	AKAP17A	2.04894	1.03488
P51531	Probable global transcription activator SNF2L2 OS=Homo sapiens GN=SMARCA2 PE=1 SV=2	1	34.8	30.7	62.6	SMARCA2	2.03909	1.02792
F5H8L0	Rab GTPase-activating protein 1-like OS=Homo sapiens GN=RABGAP1L PE=1 SV=1	2	39.1	92	187.2	RABGAP1L	2.03478	1.02487
B2R4R9	HCG26477 OS=Homo sapiens GN=RPS28 PE=2 SV=1	2	29.8	62	125.8	RPS28	2.02903	1.02079
A8K3M9	cDNA FLJ76387, highly similar to Homo sapiens splicing factor, arginine/serine-rich 9 (SFRS9), mRNA OS=Homo sapiens PE=2 SV=1	2	135.1	347.4	703	SRSF9	2.0236	1.01693
A0A024QZF2	Related RAS viral (R-ras) oncogene homolog, isoform CRA_a OS=Homo sapiens GN=RRAS PE=4 SV=1	2	13.8	12.2	24.6	RRAS	2.01639	1.01178
A0A024R1S7	SWI/SNF related, matrix associated, actin dependent regulator of chromatin, subfamily e, member 1, isoform CRA_a OS=Homo sapiens GN=SMARCE1 PE=4 SV=1	2	135.6	217	435.3	SMARCE1	2.00599	1.00431
P62316	Small nuclear ribonucleoprotein Sm D2 OS=Homo sapiens GN=SNRPD2 PE=1 SV=1	2	362.5	830.3	1664.2	SNRPD2	2.00434	1.00312
A0A0U1RRH6	PHD finger protein 14 OS=Homo sapiens GN=PHF14 PE=1 SV=1	1	16.4	31.3	62.6	PHF14	2	1
Q15149	Plectin OS=Homo sapiens GN=PLEC PE=1 SV=3	2	4552.6	9396.2	18678.2	PLEC	1.98785	0.991206
P25398	40S ribosomal protein S12 OS=Homo sapiens GN=RPS12 PE=1 SV=3	2	384.5	1596.3	3170.9	RPS12	1.98641	0.990161
Q16643	Drebrin OS=Homo sapiens GN=DBN1 PE=1 SV=4	2	143.8	274.7	545.6	DBN1	1.98617	0.989987
A0A024RDF4	Heterogeneous nuclear ribonucleoprotein D (AU-rich element RNA binding protein 1, 37kDa), isoform CRA_e OS=Homo sapiens GN=HNRPD PE=4 SV=1	2	853.1	2925.9	5809.7	HNRNPD	1.98561	0.989583
O43390	Heterogeneous nuclear ribonucleoprotein R OS=Homo sapiens GN=HNRNPR PE=1 SV=1	2	696.8	1733.5	3412.4	HNRNPR	1.9685	0.977099
A0A075B7G2	Zinc finger protein 208 OS=Homo sapiens GN=ZNF208 PE=4 SV=2	1	38.3	73.3	142.6		1.94543	0.960089
Q9Y3B4	Splicing factor 3B subunit 6 OS=Homo sapiens GN=SF3B6 PE=1 SV=1	2	104.3	167.5	325.5	SF3B14; SF3B6	1.94328	0.958496
Q9UKM9	RNA-binding protein Raly OS=Homo sapiens GN=RALY PE=1 SV=1	2	171	410.8	798	RALY	1.94255	0.957953
A0A024R5X3	SAFB-like, transcription modulator, isoform CRA_b OS=Homo sapiens GN=SLTM PE=4 SV=1	1	80.7	198.4	385.2	SLTM	1.94153	0.957196
Q9Y2X3	Nucleolar protein 58 OS=Homo sapiens GN=NOP58 PE=1 SV=1	2	356.8	985.5	1911.2	NOP58	1.93932	0.955551
Q14563	Semaphorin-3A OS=Homo sapiens GN=SEMA3A PE=1 SV=1	1	13.4	38.1	73.8	SEMA3A	1.93701	0.95383
Q12873	Chromodomain-helicase-DNA-binding protein 3 OS=Homo sapiens GN=CHD3 PE=1 SV=3	2	31.1	62.1	119.5	CHD3	1.92432	0.944345
Q9UPQ9	Trinucleotide repeat-containing gene 6B protein OS=Homo sapiens GN=TNRC6B PE=1 SV=4	2	3423.1	4103.7	7893.9	TNRC6B	1.92361	0.943813
Q9BYK8	Helicase with zinc finger domain 2 OS=Homo sapiens GN=HELZ2 PE=1 SV=6	1	120.2	299.7	576.3	HELZ2	1.92292	0.943301
Q9BRX8	Redox-regulatory protein FAM213A OS=Homo sapiens GN=FAM213A PE=1 SV=3	2	39.3	99.5	191.2	FAM213A	1.92161	0.942314
Q01844	RNA-binding protein EWS OS=Homo sapiens GN=EWSR1 PE=1 SV=1	2	2032.7	3050.7	5845.2	EWSR1	1.91602	0.938112
O75385	Serine/threonine-protein kinase ULK1 OS=Homo sapiens GN=ULK1 PE=1 SV=2	1	2.5	14.8	28.3	ULK1	1.91216	0.935205
A0A0S2Q0B1	AT-rich interactive domain-containing protein 1A OS=Homo sapiens GN=ARID1A PE=4 SV=1	2	149.4	210.6	402.7	ARID1A	1.91216	0.9352
O60488	Long-chain-fatty-acid--CoA ligase 4 OS=Homo sapiens GN=ACSL4 PE=1 SV=2	2	63.8	106.5	203.5	ACSL4	1.9108	0.934175
A0A024R8W0	DEAD (Asp-Glu-Ala-Asp) box polypeptide 48, isoform CRA_a OS=Homo sapiens GN=DDX48 PE=3 SV=1	2	296.3	509.2	972.7	EIF4A3	1.91025	0.933762
P49756	RNA-binding protein 25 OS=Homo sapiens GN=RBM25 PE=1 SV=3	2	153.1	297.2	567.3	RBM25	1.90882	0.932678
O75494	Serine/arginine-rich splicing factor 10 OS=Homo sapiens GN=SRSF10 PE=1 SV=1	2	50.8	101.8	193.8	SRSF10; LOC100996657	1.90373	0.928831
P51991	Heterogeneous nuclear ribonucleoprotein A3 OS=Homo sapiens GN=HNRNPA3 PE=1 SV=2	2	721	1526.3	2905.5	HNRNPA3	1.90362	0.928748
A0A024R870	Leucine rich repeat and sterile alpha motif containing 1, isoform CRA_a OS=Homo sapiens GN=LRSAM1 PE=4 SV=1	1	10.5	20	37.9	LRSAM1	1.895	0.922198
P16104	Histone H2AX OS=Homo sapiens GN=H2AFX PE=1 SV=2	2	386.4	758.4	1436.5	H2AFX	1.89412	0.921527
P18827	Syndecan-1 OS=Homo sapiens GN=SDC1 PE=1 SV=3	2	17.8	21.4	40.5	SDC1	1.89252	0.920311
B2R4H6	cDNA, FLJ92093, highly similar to Homo sapiens polymerase (RNA) II (DNA directed) polypeptide F (POLR2F), mRNA OS=Homo sapiens PE=2 SV=1	2	35.7	78.3	147.8	POLR2F	1.88761	0.916562
P08579	U2 small nuclear ribonucleoprotein B'' OS=Homo sapiens GN=SNRPB2 PE=1 SV=1	2	35	62.1	116.9	SNRPB2	1.88245	0.91261
A0A1C7CYX1	ELM2 and SANT domain-containing protein 1 OS=Homo sapiens GN=ELMSAN1 PE=1 SV=1	1	30.6	123.7	232.7	ELMSAN1	1.88116	0.911626
B2R802	cDNA, FLJ93681, highly similar to Homo sapiens small nuclear ribonucleoprotein polypeptide A (SNRPA), mRNA OS=Homo sapiens PE=2 SV=1	2	574.5	1730.1	3240.8	SNRPA	1.87319	0.905495
A8K9T2	cDNA FLJ78744, highly similar to Homo sapiens WD repeat domain 23 (WDR23), transcript variant 1, mRNA OS=Homo sapiens PE=2 SV=1	1	10.3	25.3	47.2	DCAF11	1.86561	0.899649
A0A140VK84	Fructosamine-3-kinase-related protein, isoform CRA_a OS=Homo sapiens GN=FN3KRP PE=2 SV=1	2	387.8	474.8	884.9	FN3KRP	1.86373	0.898194
J3KTL2	Serine/arginine-rich-splicing factor 1 OS=Homo sapiens GN=SRSF1 PE=1 SV=1	2	382.7	2444.4	4545.8	SRSF1	1.85968	0.895054
Q9UQ13	Leucine-rich repeat protein SHOC-2 OS=Homo sapiens GN=SHOC2 PE=1 SV=2	1	37.7	66.1	122.7	SHOC2	1.85628	0.892413
B7Z213	cDNA FLJ50130, highly similar to Heterogeneous nuclear ribonucleoprotein Q OS=Homo sapiens PE=2 SV=1	2	9.5	18.5	34.2	SYNCRIP	1.84865	0.886471
P14866	Heterogeneous nuclear ribonucleoprotein L OS=Homo sapiens GN=HNRNPL PE=1 SV=2	2	644.8	1067	1964.5	HNRNPL	1.84114	0.880602
Q12888	TP53-binding protein 1 OS=Homo sapiens GN=TP53BP1 PE=1 SV=2	1	84.8	150	275.6	TP53BP1	1.83733	0.877613
Q05DF2	SF3A2 protein (Fragment) OS=Homo sapiens GN=SF3A2 PE=2 SV=1	2	74.8	95.1	174.6	SF3A2	1.83596	0.876536
Q96T23	Remodeling and spacing factor 1 OS=Homo sapiens GN=RSF1 PE=1 SV=2	1	37.1	75	137.5	RSF1	1.83333	0.874469
A0A024R8C1	Transcription termination factor, RNA polymerase I, isoform CRA_a OS=Homo sapiens GN=TTF1 PE=4 SV=1	1	15.5	52.7	96.6	TTF1	1.83302	0.87422
Q12849	G-rich sequence factor 1 OS=Homo sapiens GN=GRSF1 PE=1 SV=3	2	19.2	76.2	139.2	GRSF1	1.82677	0.869296
Q15459	Splicing factor 3A subunit 1 OS=Homo sapiens GN=SF3A1 PE=1 SV=1	2	347.4	486.2	886.9	SF3A1	1.82415	0.867222
A8K644	Splicing factor, arginine/serine-rich 4, isoform CRA_b OS=Homo sapiens GN=SFRS4 PE=2 SV=1	1	119.9	632.8	1151.4	SRSF4	1.81953	0.863568
Q5T653	39S ribosomal protein L2, mitochondrial OS=Homo sapiens GN=MRPL2 PE=1 SV=2	2	22.2	70.2	127.7	MRPL2	1.81909	0.863216
B0QYD3	DNA dC->dU-editing enzyme APOBEC-3B OS=Homo sapiens GN=APOBEC3B PE=1 SV=1	1	20.5	23.1	42	APOBEC3B	1.81818	0.862496
Q9HCK5	Protein argonaute-4 OS=Homo sapiens GN=AGO4 PE=1 SV=2	1	96.7	162.7	295.6	AGO4; EIF2C4	1.81684	0.861432
H7C2Q8	EBNA1 binding protein 2, isoform CRA_d OS=Homo sapiens GN=EBNA1BP2 PE=1 SV=1	2	55.3	162.3	294.5	EBNA1BP2	1.81454	0.859605
Q53F64	Heterogeneous nuclear ribonucleoprotein AB isoform a variant (Fragment) OS=Homo sapiens PE=2 SV=1	2	365.9	1031	1859.3	HNRNPAB	1.80339	0.850715
Q96B97	SH3 domain-containing kinase-binding protein 1 OS=Homo sapiens GN=SH3KBP1 PE=1 SV=2	2	114.3	105	189.3	SH3KBP1	1.80286	0.850285
P38159	RNA-binding motif protein, X chromosome OS=Homo sapiens GN=RBMX PE=1 SV=3	2	394.1	926.8	1670.4	RBMX	1.80233	0.849864
P30626	Sorcin OS=Homo sapiens GN=SRI PE=1 SV=1	2	193	244	439.6	SRI	1.80164	0.84931
P46013	Proliferation marker protein Ki-67 OS=Homo sapiens GN=MKI67 PE=1 SV=2	2	463	1279.2	2303.8	MKI67	1.80097	0.848774
Q6IBQ5	FUS protein OS=Homo sapiens GN=FUS PE=2 SV=1	2	3889.6	6752.4	12149.1	FUS	1.79923	0.847377
Q6FGH5	RPS21 protein (Fragment) OS=Homo sapiens GN=RPS21 PE=2 SV=1	2	132.1	259.6	466.7	RPS21	1.79777	0.846205
P50402	Emerin OS=Homo sapiens GN=EMD PE=1 SV=1	2	89.4	192.8	345.2	EMD	1.79046	0.840327
O76021	Ribosomal L1 domain-containing protein 1 OS=Homo sapiens GN=RSL1D1 PE=1 SV=3	2	364.9	1364.6	2438	RSL1D1	1.7866	0.83722
Q02880	DNA topoisomerase 2-beta OS=Homo sapiens GN=TOP2B PE=1 SV=3	2	653.1	1644	2937	TOP2B	1.7865	0.837133
Q9NX58	Cell growth-regulating nucleolar protein OS=Homo sapiens GN=LYAR PE=1 SV=2	2	34.2	225.5	402.8	LYAR	1.78625	0.836936
Q08211	ATP-dependent RNA helicase A OS=Homo sapiens GN=DHX9 PE=1 SV=4	2	1125	3254.9	5797.7	DHX9	1.78122	0.832867
Q96MG8	Protein-L-isoaspartate O-methyltransferase domain-containing protein 1 OS=Homo sapiens GN=PCMTD1 PE=1 SV=2	2	143.4	201.6	359	PCMTD1	1.78075	0.832488
Q7Z442	Polycystic kidney disease protein 1-like 2 OS=Homo sapiens GN=PKD1L2 PE=1 SV=4	1	174.9	213.2	379.1	PKD1L2	1.77814	0.830371
O75533	Splicing factor 3B subunit 1 OS=Homo sapiens GN=SF3B1 PE=1 SV=3	2	500.5	825	1465.1	SF3B1	1.77588	0.828533
A0A024RAH8	RNA helicase OS=Homo sapiens GN=DDX18 PE=3 SV=1	2	236	844.7	1499.9	DDX18	1.77566	0.828355
Q9HCJ0	Trinucleotide repeat-containing gene 6C protein OS=Homo sapiens GN=TNRC6C PE=1 SV=3	1	420.4	521.3	924.1	TNRC6C	1.77268	0.825935
Q13127	RE1-silencing transcription factor OS=Homo sapiens GN=REST PE=1 SV=3	1	23.6	72.2	127.9	REST	1.77147	0.824946
Q6P2E9	Enhancer of mRNA-decapping protein 4 OS=Homo sapiens GN=EDC4 PE=1 SV=1	1	10.4	23.1	40.9	EDC4	1.77056	0.824208
A8K6U7	cDNA FLJ78252, highly similar to Homo sapiens heterogeneous nuclear ribonucleoprotein U-like 1 (HNRPUL1), transcript variant 1, mRNA OS=Homo sapiens PE=2 SV=1	2	4436	8203.1	14506.7	HNRNPUL1	1.76844	0.822478
Q13884	Beta-1-syntrophin OS=Homo sapiens GN=SNTB1 PE=1 SV=3	1	16.4	26.7	47.2	SNTB1	1.76779	0.821947
Q96C19	EF-hand domain-containing protein D2 OS=Homo sapiens GN=EFHD2 PE=1 SV=1	2	241.6	228.2	403.3	EFHD2	1.76731	0.821555
A0A024R046	High mobility group nucleosomal binding domain 4, isoform CRA_a OS=Homo sapiens GN=HMGN4 PE=4 SV=1	1	39.8	155.3	273.4	HMGN4	1.76046	0.815955
A6NHR9	Structural maintenance of chromosomes flexible hinge domain-containing protein 1 OS=Homo sapiens GN=SMCHD1 PE=1 SV=2	2	233.6	183.3	322.4	SMCHD1	1.75887	0.814645
O75475	PC4 and SFRS1-interacting protein OS=Homo sapiens GN=PSIP1 PE=1 SV=1	2	279.7	796.4	1398.7	PSIP1	1.75628	0.812521
A8K8W4	cDNA FLJ77609, highly similar to Homo sapiens DnaJ (Hsp40) homolog, subfamily C, member 16 (DNAJC16), mRNA OS=Homo sapiens PE=2 SV=1	1	10.3	60.4	106	DNAJC16	1.75497	0.811444
Q15397	Pumilio homolog 3 OS=Homo sapiens GN=PUM3 PE=1 SV=3	1	43.6	100.1	175.4	KIAA0020; PUM3	1.75225	0.809207
Q9NPE3	H/ACA ribonucleoprotein complex subunit 3 OS=Homo sapiens GN=NOP10 PE=1 SV=1	1	51.6	160.4	280.7	NOP10	1.75	0.807355
A0A087WXU3	Extended synaptotagmin-2 OS=Homo sapiens GN=ESYT2 PE=1 SV=1	1	26.9	86.4	151		1.74769	0.805445
O94929	Actin-binding LIM protein 3 OS=Homo sapiens GN=ABLIM3 PE=1 SV=3	1	50.8	81	141.3	ABLIM3	1.74444	0.802768
Q13151	Heterogeneous nuclear ribonucleoprotein A0 OS=Homo sapiens GN=HNRNPA0 PE=1 SV=1	2	189.7	564.2	984	HNRNPA0	1.74406	0.802452
A0A0D9SGE8	PHD finger protein 6 OS=Homo sapiens GN=PHF6 PE=1 SV=1	2	151.2	813.2	1417.8	PHF6	1.74348	0.801972
P45973	Chromobox protein homolog 5 OS=Homo sapiens GN=CBX5 PE=1 SV=1	2	143.5	259.2	451.9	CBX5	1.74344	0.801938
Q13595	Transformer-2 protein homolog alpha OS=Homo sapiens GN=TRA2A PE=1 SV=1	2	24.2	50.6	88.2	TRA2A	1.74308	0.801641
Q59EL4	PRPF4 protein variant (Fragment) OS=Homo sapiens PE=2 SV=1	1	10.8	26.8	46.7	PRPF4	1.74254	0.80119
P35556	Fibrillin-2 OS=Homo sapiens GN=FBN2 PE=1 SV=3	2	10.6	19	33.1	FBN2	1.74211	0.800832
P62304	Small nuclear ribonucleoprotein E OS=Homo sapiens GN=SNRPE PE=1 SV=1	2	49.8	96.7	168.4	SNRPE	1.74147	0.800304
Q96PK6	RNA-binding protein 14 OS=Homo sapiens GN=RBM14 PE=1 SV=2	2	740.7	1180.3	2050.7	RBM14; RBM14-RBM4	1.73744	0.796963
P62851	40S ribosomal protein S25 OS=Homo sapiens GN=RPS25 PE=1 SV=1	2	220	1012.6	1759.1	RPS25	1.73721	0.796773
Q8WVX7	Ribosomal protein S19 (Fragment) OS=Homo sapiens PE=2 SV=1	2	496.6	1808	3140	RPS19	1.73673	0.79637
A4PIV7	Fusion protein SYT-SSX1 OS=Homo sapiens GN=SYT-SSX1 PE=1 SV=1	2	318.1	465.2	807.8		1.73646	0.796147
O14776	Transcription elongation regulator 1 OS=Homo sapiens GN=TCERG1 PE=1 SV=2	2	25.6	23.4	40.6	TCERG1	1.73504	0.794971
Q9UJP4	Kelch-like protein 21 OS=Homo sapiens GN=KLHL21 PE=1 SV=4	1	7.8	20.7	35.9	KLHL21	1.7343	0.794353
X6RAL5	Histone deacetylase complex subunit SAP18 OS=Homo sapiens GN=SAP18 PE=1 SV=1	1	83.2	390.1	675.6	SAP18	1.73186	0.792325
A0A024R1U2	PHD finger protein 5A, isoform CRA_a OS=Homo sapiens GN=PHF5A PE=4 SV=1	2	60.9	104.3	180.5	PHF5A	1.73058	0.79126
Q8NDV7	Trinucleotide repeat-containing gene 6A protein OS=Homo sapiens GN=TNRC6A PE=1 SV=2	2	953.9	1301.9	2248.8	TNRC6A	1.72732	0.788537
Q13501	Sequestosome-1 OS=Homo sapiens GN=SQSTM1 PE=1 SV=1	1	8.1	16.1	27.8	SQSTM1	1.72671	0.788024
Q13185	Chromobox protein homolog 3 OS=Homo sapiens GN=CBX3 PE=1 SV=4	2	196.1	325.8	562.5	CBX3; C15orf57; CCDC32	1.72652	0.787866
Q59E85	Caveolin (Fragment) OS=Homo sapiens PE=2 SV=1	2	58.8	103.7	179	CAV1	1.72613	0.787544
P55795	Heterogeneous nuclear ribonucleoprotein H2 OS=Homo sapiens GN=HNRNPH2 PE=1 SV=1	2	271.9	513	885.1	HNRNPH2	1.72534	0.786882
P13010	X-ray repair cross-complementing protein 5 OS=Homo sapiens GN=XRCC5 PE=1 SV=3	2	1181.1	3147.6	5419.5	XRCC5	1.72179	0.783908
Q6UXH1	Cysteine-rich with EGF-like domain protein 2 OS=Homo sapiens GN=CRELD2 PE=1 SV=1	2	22.4	35.8	61.6	CRELD2	1.72067	0.782971
A0A087WUE4	Leukocyte receptor cluster member 8 OS=Homo sapiens GN=LENG8 PE=1 SV=1	1	27.6	52.2	89.8	LENG8	1.72031	0.782666
Q8IXI2	Mitochondrial Rho GTPase 1 OS=Homo sapiens GN=RHOT1 PE=1 SV=2	1	7.8	13.9	23.9	RHOT1	1.71942	0.781926
Q9H9G7	Protein argonaute-3 OS=Homo sapiens GN=AGO3 PE=1 SV=2	2	515.7	737	1267.2	AGO3; EIF2C3	1.7194	0.781908
O15014	Zinc finger protein 609 OS=Homo sapiens GN=ZNF609 PE=1 SV=2	1	11.3	38.3	65.8	ZNF609	1.71802	0.780743
O60293	Zinc finger C3H1 domain-containing protein OS=Homo sapiens GN=ZFC3H1 PE=1 SV=3	1	18.5	49.1	84.3	ZFC3H1	1.7169	0.77981
P04899	Guanine nucleotide-binding protein G(i) subunit alpha-2 OS=Homo sapiens GN=GNAI2 PE=1 SV=3	2	109.1	179.2	307.6	GNAI2	1.71652	0.779485
K7ELC2	40S ribosomal protein S15 OS=Homo sapiens GN=RPS15 PE=1 SV=1	2	186.7	806	1382.2	RPS15	1.71489	0.778115
Q08AF3	Schlafen family member 5 OS=Homo sapiens GN=SLFN5 PE=1 SV=1	2	210.5	490.4	840.9	SLFN5	1.71472	0.777975
A0A140GPP7	Prolyl endopeptidase FAP OS=Homo sapiens PE=4 SV=1	2	453.2	889.9	1524.9	FAP	1.71356	0.777
P10589	COUP transcription factor 1 OS=Homo sapiens GN=NR2F1 PE=1 SV=1	1	9	18.5	31.7	NR2F1	1.71351	0.776958
P22087	rRNA 2'-O-methyltransferase fibrillarin OS=Homo sapiens GN=FBL PE=1 SV=2	2	443.3	1002.6	1715.4	FBL	1.71095	0.774799
B1AHD1	NHP2-like protein 1 OS=Homo sapiens GN=SNU13 PE=1 SV=1	2	16.9	63.4	108.4	NHP2L1; SNU13	1.70978	0.77381
B4DYZ7	cDNA FLJ54316, highly similar to DNA polymerase subunit delta 3 OS=Homo sapiens PE=2 SV=1	2	62.4	82	140.1	POLD3	1.70854	0.772761
O75643	U5 small nuclear ribonucleoprotein 200 kDa helicase OS=Homo sapiens GN=SNRNP200 PE=1 SV=2	2	812	1374.9	2347.7	SNRNP200	1.70754	0.771921
Q15061	WD repeat-containing protein 43 OS=Homo sapiens GN=WDR43 PE=1 SV=3	1	27.7	52.8	90.1	WDR43	1.70644	0.770989
Q9P2J8	Zinc finger protein 624 OS=Homo sapiens GN=ZNF624 PE=1 SV=3	1	10.3	88.1	150.3	ZNF624	1.70602	0.770631
D2CFK9	Nucleolar GTP-binding protein 1 OS=Homo sapiens GN=GTPBP4 PE=3 SV=1	1	189.1	626.6	1068.2	GTPBP4	1.70476	0.769565
Q6FG99	RPLP1 protein OS=Homo sapiens GN=RPLP1 PE=2 SV=1	2	59.5	401.5	683.7	RPLP1	1.70286	0.767963
B2RAD8	cDNA, FLJ94852, highly similar to Homo sapiens eukaryotic translation initiation factor 2C, 1 (EIF2C1), mRNA OS=Homo sapiens PE=2 SV=1	2	802.5	1267.2	2157.2	AGO1; EIF2C1	1.70234	0.767516
Q92804	TATA-binding protein-associated factor 2N OS=Homo sapiens GN=TAF15 PE=1 SV=1	2	853.7	1240.5	2107.5	TAF15	1.69891	0.764611
A0A024R7T3	Heterogeneous nuclear ribonucleoprotein F, isoform CRA_a OS=Homo sapiens GN=HNRPF PE=4 SV=1	2	392.9	901.1	1529.1	HNRNPF	1.69693	0.762924
A0A024RDF6	Heterogeneous nuclear ribonucleoprotein D-like, isoform CRA_a OS=Homo sapiens GN=HNRPDL PE=4 SV=1	2	1078.8	2037.7	3457.7	HNRNPDL; HNRPDL	1.69686	0.762871
Q71RG0	FP2926 OS=Homo sapiens PE=2 SV=1	1	11.1	27	45.8	CAMKK1	1.6963	0.762388
Q01085	Nucleolysin TIAR OS=Homo sapiens GN=TIAL1 PE=1 SV=1	2	853.5	1399.4	2372.5	TIAL1	1.69537	0.7616
B2RDQ3	cDNA, FLJ96718, highly similar to Homo sapiens splicing factor, arginine/serine-rich 10 (transformer 2 homolog, Drosophila) (SFRS10), mRNA OS=Homo sapiens PE=2 SV=1	2	103.2	311	526.9	TRA2B	1.69421	0.760615
P22626	Heterogeneous nuclear ribonucleoproteins A2/B1 OS=Homo sapiens GN=HNRNPA2B1 PE=1 SV=2	2	1773.4	3985.3	6748.4	HNRNPA2B1	1.69332	0.759857
P0C7P0	CDGSH iron-sulfur domain-containing protein 3, mitochondrial OS=Homo sapiens GN=CISD3 PE=1 SV=1	1	17.3	60.6	102.6	CISD3	1.69307	0.759641
Q5T5P2	Sickle tail protein homolog OS=Homo sapiens GN=KIAA1217 PE=1 SV=2	2	320.5	1367.3	2313	KIAA1217	1.69166	0.758435
Q58EY4	SWI/SNF related, matrix associated, actin dependent regulator of chromatin, subfamily c, member 1 OS=Homo sapiens GN=SMARCC1 PE=2 SV=1	2	113.1	122.6	207.2	SMARCC1	1.69005	0.757065
O60506	Heterogeneous nuclear ribonucleoprotein Q OS=Homo sapiens GN=SYNCRIP PE=1 SV=2	2	1131.9	3437.5	5809.5	SYNCRIP	1.69004	0.757054
O95429	BAG family molecular chaperone regulator 4 OS=Homo sapiens GN=BAG4 PE=1 SV=1	2	335.4	1230.2	2078.8	BAG4	1.68981	0.756858
Q9NVV4	Poly(A) RNA polymerase, mitochondrial OS=Homo sapiens GN=MTPAP PE=1 SV=1	2	59.1	167.3	282.6	MTPAP	1.68918	0.756324
Q9NW13	RNA-binding protein 28 OS=Homo sapiens GN=RBM28 PE=1 SV=3	2	102.2	490.3	827.5	RBM28	1.68774	0.755095
P83876	Thioredoxin-like protein 4A OS=Homo sapiens GN=TXNL4A PE=1 SV=1	2	42.9	76.6	129.2	TXNL4A	1.68668	0.75419
F4ZW62	NF45 OS=Homo sapiens PE=1 SV=1	2	333.8	981	1653.6	ILF2	1.68563	0.753285
A0A024R1N4	X-ray repair complementing defective repair in Chinese hamster cells 6 (Ku autoantigen, 70kDa), isoform CRA_a OS=Homo sapiens GN=XRCC6 PE=4 SV=1	2	1077.2	2487.3	4188.3	XRCC6	1.68387	0.751784
P35580	Myosin-10 OS=Homo sapiens GN=MYH10 PE=1 SV=3	2	800.6	1399.6	2356	MYH10	1.68334	0.751325
Q53G59	Kelch-like protein 12 OS=Homo sapiens GN=KLHL12 PE=1 SV=2	1	16.7	25.5	42.9	KLHL12	1.68235	0.75048
B2RWP0	Signal-induced proliferation-associated 1 like 3 OS=Homo sapiens GN=SIPA1L3 PE=2 SV=1	1	13.6	23.2	39	SIPA1L3	1.68103	0.749349
A0A024R6Q2	tRNA (adenine(58)-N(1))-methyltransferase catalytic subunit TRMT61A OS=Homo sapiens GN=C14orf172 PE=3 SV=1	1	7	20.8	34.9	TRMT61A	1.67788	0.746644
A6H8X9	Centrosomal protein 170kDa OS=Homo sapiens GN=CEP170 PE=2 SV=1	2	10.6	75.6	126.8	CEP170	1.67725	0.746097
A0A024RAZ7	Heterogeneous nuclear ribonucleoprotein A1, isoform CRA_b OS=Homo sapiens GN=HNRPA1 PE=4 SV=1	2	470.5	1434.3	2403.6	HNRNPA1	1.6758	0.74485
O43818	U3 small nucleolar RNA-interacting protein 2 OS=Homo sapiens GN=RRP9 PE=1 SV=1	1	24.2	52.6	88.1	RRP9	1.6749	0.744079
B2R6P3	cDNA, FLJ93047, highly similar to Homo sapiens matrix metallopeptidase 14 (membrane-inserted) (MMP14), mRNA OS=Homo sapiens PE=2 SV=1	2	100.1	175.7	293.9	MMP14	1.67274	0.742211
B9EG90	Topoisomerase (DNA) I OS=Homo sapiens GN=TOP1 PE=2 SV=1	2	612	3951.6	6602.4	TOP1	1.67082	0.740554
Q9C0J8	pre-mRNA 3' end processing protein WDR33 OS=Homo sapiens GN=WDR33 PE=1 SV=2	2	57.3	125.6	209.8	WDR33	1.67038	0.740178
P16989	Y-box-binding protein 3 OS=Homo sapiens GN=YBX3 PE=1 SV=4	2	21.7	93.4	156	CSDA; YBX3	1.67024	0.740052
B2R7T6	cDNA, FLJ93596, highly similar to Homo sapiens sulfide quinone reductase-like (yeast) (SQRDL), mRNA OS=Homo sapiens PE=2 SV=1	2	146	580.3	969.2	SQRDL; SQOR	1.67017	0.739995
O00541	Pescadillo homolog OS=Homo sapiens GN=PES1 PE=1 SV=1	2	55.5	121.1	201.9	PES1	1.66722	0.737442
B4E2A6	cDNA FLJ55508, highly similar to Sad1/unc-84-like protein 2 OS=Homo sapiens PE=2 SV=1	1	16.8	24	40	SUN2	1.66667	0.736966
P16401	Histone H1.5 OS=Homo sapiens GN=HIST1H1B PE=1 SV=3	2	552.8	2796.8	4661	HIST1H1B	1.66655	0.736862
A0A024R1T4	Trinucleotide repeat containing 6B, isoform CRA_b OS=Homo sapiens GN=TNRC6B PE=4 SV=1	2	32.6	40.3	67.1	TNRC6B	1.66501	0.735533
P19525	Interferon-induced, double-stranded RNA-activated protein kinase OS=Homo sapiens GN=EIF2AK2 PE=1 SV=2	2	158.7	546.5	909	EIF2AK2	1.66331	0.734059
O96019	Actin-like protein 6A OS=Homo sapiens GN=ACTL6A PE=1 SV=1	2	411.6	583.3	970.2	ACTL6A	1.6633	0.734044
A3R0T8	Histone 1, H1e OS=Homo sapiens GN=HIST1H1E PE=2 SV=1	2	1251.3	7469.5	12421.4	HIST1H1E	1.66295	0.733744
P55081	Microfibrillar-associated protein 1 OS=Homo sapiens GN=MFAP1 PE=1 SV=2	1	50.9	87.5	145.5	MFAP1	1.66286	0.733664
G8JLB6	Heterogeneous nuclear ribonucleoprotein H OS=Homo sapiens GN=HNRNPH1 PE=1 SV=1	2	925.6	1802.5	2995.4	HNRNPH1	1.6618	0.732749
Q5SQP8	C-terminal-binding protein 2 OS=Homo sapiens GN=CTBP2 PE=1 SV=1	1	7.6	9.4	15.6	CTBP2	1.65957	0.730813
P16070	CD44 antigen OS=Homo sapiens GN=CD44 PE=1 SV=3	2	125.9	252.5	418.9	CD44	1.65901	0.730322
A0A1W2PPS1	Heterogeneous nuclear ribonucleoprotein U OS=Homo sapiens GN=HNRNPU PE=1 SV=1	2	24.1	47.2	78.3		1.6589	0.730225
O43301	Heat shock 70 kDa protein 12A OS=Homo sapiens GN=HSPA12A PE=1 SV=2	2	15.4	19.2	31.8	HSPA12A	1.65625	0.72792
Q8IXQ6	Poly [ADP-ribose] polymerase 9 OS=Homo sapiens GN=PARP9 PE=1 SV=2	1	25.3	25	41.3	PARP9	1.652	0.724214
Q07666	KH domain-containing, RNA-binding, signal transduction-associated protein 1 OS=Homo sapiens GN=KHDRBS1 PE=1 SV=1	2	652.7	1158.7	1913.6	KHDRBS1	1.65151	0.723782
Q68CP9	AT-rich interactive domain-containing protein 2 OS=Homo sapiens GN=ARID2 PE=1 SV=2	1	3	12.8	21.1	ARID2	1.64844	0.721099
Q2TB10	Zinc finger protein 800 OS=Homo sapiens GN=ZNF800 PE=1 SV=1	2	20	57.6	94.9	ZNF800	1.64757	0.720339
P26373	60S ribosomal protein L13 OS=Homo sapiens GN=RPL13 PE=1 SV=4	2	291.3	1102.2	1815.2	RPL13	1.64689	0.719742
Q6ZN08	Putative zinc finger protein 66 OS=Homo sapiens GN=ZNF66 PE=5 SV=3	1	28.2	297	487.2	ZNF66; ZNF66P	1.6404	0.714051
Q9BYG3	MKI67 FHA domain-interacting nucleolar phosphoprotein OS=Homo sapiens GN=NIFK PE=1 SV=1	2	99.5	280.3	459.8	MKI67IP; NIFK	1.64039	0.714035
Q13485	Mothers against decapentaplegic homolog 4 OS=Homo sapiens GN=SMAD4 PE=1 SV=1	2	85.9	30.5	50	SMAD4	1.63934	0.713119
B2R6F3	Splicing factor arginine/serine-rich 3 OS=Homo sapiens GN=SFRS3 PE=2 SV=1	2	330.4	1208.9	1979.3	SRSF3	1.63727	0.711295
F4ZW66	NF110b OS=Homo sapiens PE=2 SV=1	2	772.8	2588.7	4234.6	ILF3	1.6358	0.709998
Q9NR30	Nucleolar RNA helicase 2 OS=Homo sapiens GN=DDX21 PE=1 SV=5	2	306.8	1123.1	1836.8	DDX21	1.63547	0.709708
O43290	U4/U6.U5 tri-snRNP-associated protein 1 OS=Homo sapiens GN=SART1 PE=1 SV=1	2	3.4	29.4	48	SART1	1.63265	0.707218
Q9H8H0	Nucleolar protein 11 OS=Homo sapiens GN=NOL11 PE=1 SV=1	1	43.6	66.9	109.2	NOL11	1.63229	0.706895
A0A090N8G7	Similar to RP9 protein OS=Homo sapiens GN=LOC402478 PE=4 SV=1	2	379.1	273	445.6		1.63223	0.706848
Q53GW1	Vesicle transport-related protein isoform a variant (Fragment) OS=Homo sapiens PE=2 SV=1	2	11.7	26.2	42.7	SCFD1	1.62977	0.704669
Q6IQ30	Polyadenylate-binding protein OS=Homo sapiens GN=PABPC4 PE=2 SV=1	2	731.3	2222.4	3621.9	PABPC4	1.62972	0.704628
Q9NUD5	Zinc finger CCHC domain-containing protein 3 OS=Homo sapiens GN=ZCCHC3 PE=1 SV=1	2	8.7	15.5	25.2	ZCCHC3	1.62581	0.701156
Q3LI55	Keratin associated protein OS=Homo sapiens GN=KRTAP11-1 PE=2 SV=1	1	67.2	1.6	2.6	KRTAP11-1	1.625	0.70044
A8K3R2	Ribosome biogenesis protein BOP1 OS=Homo sapiens GN=BOP1 PE=2 SV=1	1	35.2	75.1	122	BOP1	1.6245	0.699996
B2R6E2	cDNA, FLJ92910, highly similar to Homo sapiens programmed cell death 4 (neoplastic transformation inhibitor) (PDCD4), transcript variant 1, mRNA OS=Homo sapiens PE=2 SV=1	2	56.1	122.2	198.3	PDCD4	1.62275	0.69844
E5RGQ3	RWD domain-containing protein 1 (Fragment) OS=Homo sapiens GN=RWDD1 PE=1 SV=1	2	109.5	62.2	100.7		1.61897	0.695077
Q59EA2	Coronin (Fragment) OS=Homo sapiens PE=2 SV=1	2	1371.8	2224	3599.7	CORO1C	1.61857	0.69472
Q8IXB1	DnaJ homolog subfamily C member 10 OS=Homo sapiens GN=DNAJC10 PE=1 SV=2	2	767.7	948.6	1535.3	DNAJC10	1.61849	0.694649
Q6ZMK3	FLJ00340 protein (Fragment) OS=Homo sapiens GN=FLJ00340 PE=2 SV=1	2	8.4	17.8	28.8	SP100	1.61798	0.694192
A0A024R6K1	Cyclin K, isoform CRA_c OS=Homo sapiens GN=CCNK PE=3 SV=1	2	24.6	84.1	135.8	CCNK	1.61474	0.691306
Q9Y6Y0	Influenza virus NS1A-binding protein OS=Homo sapiens GN=IVNS1ABP PE=1 SV=3	1	115.5	163.8	264.2	IVNS1ABP	1.61294	0.689695
A0A0A0MRM9	Nucleolar and coiled-body phosphoprotein 1 (Fragment) OS=Homo sapiens GN=NOLC1 PE=1 SV=1	2	343.8	800.1	1288.5		1.61042	0.68744
Q53H29	Nucleoporin 54kDa variant (Fragment) OS=Homo sapiens PE=2 SV=1	1	53.8	200.4	322.7	NUP54	1.61028	0.687311
Q96HS1	Serine/threonine-protein phosphatase PGAM5, mitochondrial OS=Homo sapiens GN=PGAM5 PE=1 SV=2	2	180.2	1279.1	2059.4	PGAM5	1.61004	0.687095
Q96PZ2	Protein FAM111A OS=Homo sapiens GN=FAM111A PE=1 SV=2	2	63.5	458.7	738	FAM111A	1.60889	0.68607
Q12797	Aspartyl/asparaginyl beta-hydroxylase OS=Homo sapiens GN=ASPH PE=1 SV=3	2	346.2	2224.6	3575.9	ASPH	1.60744	0.68476
Q86X95	Corepressor interacting with RBPJ 1 OS=Homo sapiens GN=CIR1 PE=1 SV=1	2	32	35.8	57.5	CIR1	1.60615	0.683602
C9J6P4	Zinc finger CCCH-type antiviral protein 1 OS=Homo sapiens GN=ZC3HAV1 PE=1 SV=1	2	345.7	1551.8	2491.7	ZC3HAV1	1.60568	0.683188
Q15050	Ribosome biogenesis regulatory protein homolog OS=Homo sapiens GN=RRS1 PE=1 SV=2	2	88.7	438.5	703.6	RRS1	1.60456	0.682179
Q5SW79	Centrosomal protein of 170 kDa OS=Homo sapiens GN=CEP170 PE=1 SV=1	2	891.9	3351.8	5374.7	CEP170	1.60353	0.681248
Q16891	MICOS complex subunit MIC60 OS=Homo sapiens GN=IMMT PE=1 SV=1	2	175.9	557.4	893.3	IMMT	1.60262	0.680432
Q9BRK4	Leucine zipper putative tumor suppressor 2 OS=Homo sapiens GN=LZTS2 PE=1 SV=2	1	9.9	21	33.6	LZTS2	1.6	0.678072
A8K3Y5	cDNA FLJ78186 OS=Homo sapiens PE=2 SV=1	2	131.5	856.7	1370.2	LYAR	1.59939	0.677524
P61254	60S ribosomal protein L26 OS=Homo sapiens GN=RPL26 PE=1 SV=1	2	286.6	1228	1963.6	RPL26	1.59902	0.677191
Q14692	Ribosome biogenesis protein BMS1 homolog OS=Homo sapiens GN=BMS1 PE=1 SV=1	2	32.4	96.1	153.6	BMS1	1.59834	0.67657
A0A024QZK8	Heterogeneous nuclear ribonucleoprotein H3 (2H9), isoform CRA_a OS=Homo sapiens GN=HNRPH3 PE=4 SV=1	2	643.8	1091.2	1743.9	HNRNPH3	1.59815	0.676402
Q09161	Nuclear cap-binding protein subunit 1 OS=Homo sapiens GN=NCBP1 PE=1 SV=1	2	211.3	456.9	729	NCBP1	1.59554	0.67404
A8MXP9	Matrin-3 OS=Homo sapiens GN=MATR3 PE=1 SV=1	2	336.6	796.4	1269.2		1.59367	0.672354
A0A087WUZ3	Spectrin beta chain OS=Homo sapiens GN=SPTBN1 PE=1 SV=1	2	969.1	1308.3	2084.9		1.59359	0.672285
F8W930	Insulin-like growth factor 2 mRNA-binding protein 2 OS=Homo sapiens GN=IGF2BP2 PE=1 SV=1	2	245.8	967.5	1541.3	IGF2BP2	1.59307	0.671814
B4DUT2	cDNA FLJ53206 OS=Homo sapiens PE=2 SV=1	2	17	81.7	130.1	KRI1	1.59241	0.671213
Q00537	Cyclin-dependent kinase 17 OS=Homo sapiens GN=CDK17 PE=1 SV=2	2	171.1	448.1	713.3	CDK17	1.59183	0.670688
F8VXC8	SWI/SNF complex subunit SMARCC2 OS=Homo sapiens GN=SMARCC2 PE=1 SV=1	2	160.3	227.9	362.6	SMARCC2	1.59105	0.669978
Q6P2Q9	Pre-mRNA-processing-splicing factor 8 OS=Homo sapiens GN=PRPF8 PE=1 SV=2	2	696.9	1361.6	2163.6	PRPF8	1.58901	0.668131
Q02447	Transcription factor Sp3 OS=Homo sapiens GN=SP3 PE=1 SV=3	1	8.6	27.2	43.2	SP3	1.58824	0.667425
Q92522	Histone H1x OS=Homo sapiens GN=H1FX PE=1 SV=1	2	368.4	1312	2079.3	H1FX	1.58483	0.66433
A4D0W0	LSM8 homolog, U6 small nuclear RNA associated (S. cerevisiae) OS=Homo sapiens GN=LSM8 PE=2 SV=1	2	13.7	16.9	26.7	NAA38; LSM8	1.57988	0.659816
Q9Y2P8	RNA 3'-terminal phosphate cyclase-like protein OS=Homo sapiens GN=RCL1 PE=1 SV=3	1	29.7	44.2	69.8	RCL1	1.57919	0.659181
D0PNI2	Lysyl oxidase OS=Homo sapiens GN=LOX PE=4 SV=1	2	361	465.6	735.1	LOX	1.57882	0.658849
M0R0R2	40S ribosomal protein S5 OS=Homo sapiens GN=RPS5 PE=1 SV=1	2	66.9	161.9	255.6		1.57875	0.658785
A0A0F7NGI8	Leucine rich repeat (In FLII) interacting protein 1, isoform CRA_c OS=Homo sapiens GN=LRRFIP1 PE=2 SV=1	2	280.9	946.5	1492.7	LRRFIP1	1.57707	0.65725
Q8TDN6	Ribosome biogenesis protein BRX1 homolog OS=Homo sapiens GN=BRIX1 PE=1 SV=2	1	74.9	238.1	375.3	BRIX1	1.57623	0.656477
A0A024R6D8	Splicing factor, arginine/serine-rich 5, isoform CRA_a OS=Homo sapiens GN=SFRS5 PE=4 SV=1	2	123.9	529.6	833.9	SRSF5	1.57458	0.654971
Q5W009	RNA binding motif protein 17, isoform CRA_a OS=Homo sapiens GN=RBM17 PE=2 SV=1	1	87.2	173.8	273.6	RBM17	1.57422	0.65464
Q59FG9	Chondroitin sulfate proteoglycan 2 (Versican) variant (Fragment) OS=Homo sapiens PE=2 SV=1	2	37.2	106.8	167.6	VCAN	1.56929	0.650111
Q9Y221	60S ribosome subunit biogenesis protein NIP7 homolog OS=Homo sapiens GN=NIP7 PE=1 SV=1	1	23.6	24.6	38.6	NIP7	1.56911	0.649943
Q00577	Transcriptional activator protein Pur-alpha OS=Homo sapiens GN=PURA PE=1 SV=2	2	137.6	626.7	981.7	PURA	1.56646	0.647507
B2R713	cDNA, FLJ93224 OS=Homo sapiens PE=2 SV=1	2	27.6	93.9	147	TRMT1L	1.5655	0.646619
Q12906	Interleukin enhancer-binding factor 3 OS=Homo sapiens GN=ILF3 PE=1 SV=3	2	12.8	34.9	54.6	ILF3	1.56447	0.645674
Q6FG93	HCG34604, isoform CRA_c OS=Homo sapiens GN=VAMP5 PE=2 SV=1	2	6.3	8.7	13.6	VAMP5	1.56322	0.644519
Q92900	Regulator of nonsense transcripts 1 OS=Homo sapiens GN=UPF1 PE=1 SV=2	2	1213.4	2805.5	4384.1	UPF1	1.56268	0.644023
Q9HCE1	Putative helicase MOV-10 OS=Homo sapiens GN=MOV10 PE=1 SV=2	2	656.9	2146.8	3352.9	MOV10	1.56181	0.643222
P36639	7,8-dihydro-8-oxoguanine triphosphatase OS=Homo sapiens GN=NUDT1 PE=1 SV=3	2	111.6	162.4	253.5	NUDT1	1.56096	0.642434
Q562L9	Actin-like protein (Fragment) OS=Homo sapiens GN=ACT PE=4 SV=1	2	25.2	32.7	51	ACTG1	1.55963	0.641207
P42166	Lamina-associated polypeptide 2, isoform alpha OS=Homo sapiens GN=TMPO PE=1 SV=2	2	72.6	139	216.5	TMPO	1.55755	0.639282
J3KNL6	Protein transport protein Sec16A OS=Homo sapiens GN=SEC16A PE=1 SV=1	2	1157.3	2969.6	4624.3	SEC16A	1.55721	0.638966
P16403	Histone H1.2 OS=Homo sapiens GN=HIST1H1C PE=1 SV=2	2	263.9	1416.1	2205	HIST1H1C	1.55709	0.638856
P35269	General transcription factor IIF subunit 1 OS=Homo sapiens GN=GTF2F1 PE=1 SV=2	2	30.7	38.2	59.4	GTF2F1	1.55497	0.63689
O75400	Pre-mRNA-processing factor 40 homolog A OS=Homo sapiens GN=PRPF40A PE=1 SV=2	2	660.2	1161.7	1804.5	PRPF40A	1.55333	0.635362
Q9NZI8	Insulin-like growth factor 2 mRNA-binding protein 1 OS=Homo sapiens GN=IGF2BP1 PE=1 SV=2	2	224.8	747.2	1160.2	IGF2BP1	1.55273	0.634807
A0A024QZM9	Plasminogen activator, urokinase, isoform CRA_a OS=Homo sapiens GN=PLAU PE=3 SV=1	2	25.1	43.5	67.5	PLAU	1.55172	0.633872
A0A024R4H0	Procollagen-lysine 1, 2-oxoglutarate 5-dioxygenase 1, isoform CRA_a OS=Homo sapiens GN=PLOD1 PE=4 SV=1	2	342.1	576.9	893.4	PLOD1	1.54862	0.630985
Q6FIE5	PHP14 protein OS=Homo sapiens GN=PHP14 PE=2 SV=1	2	53.7	111.2	172	PHPT1	1.54676	0.629252
P60673	Profilin-3 OS=Homo sapiens GN=PFN3 PE=2 SV=1	1	114.7	216.4	334.5	PFN3	1.54575	0.628306
O43143	Pre-mRNA-splicing factor ATP-dependent RNA helicase DHX15 OS=Homo sapiens GN=DHX15 PE=1 SV=2	2	618.7	1099.3	1697.6	DHX15	1.54426	0.626911
P29372	DNA-3-methyladenine glycosylase OS=Homo sapiens GN=MPG PE=1 SV=3	1	29.8	66.7	103	MPG	1.54423	0.626886
Q9UMS4	Pre-mRNA-processing factor 19 OS=Homo sapiens GN=PRPF19 PE=1 SV=1	2	187.5	429.4	662.7	PRPF19	1.54332	0.626034
B3KUL5	Oxysterol-binding protein OS=Homo sapiens PE=2 SV=1	2	4.1	17.5	27		1.54286	0.625604
Q13148	TAR DNA-binding protein 43 OS=Homo sapiens GN=TARDBP PE=1 SV=1	2	263.8	489	752.8	TARDBP	1.53947	0.622432
F8VU51	YLP motif-containing protein 1 OS=Homo sapiens GN=YLPM1 PE=1 SV=1	2	42.4	103.4	159.1	YLPM1	1.53868	0.621698
A0A024RCJ8	HCG1821276, isoform CRA_a OS=Homo sapiens GN=hCG_1821276 PE=4 SV=1	2	162.7	228	350.4	PPP1R18	1.53684	0.619969
O94776	Metastasis-associated protein MTA2 OS=Homo sapiens GN=MTA2 PE=1 SV=1	2	288.3	538.7	827.7	MTA2	1.53648	0.619626
Q96F88	Processing of 1, ribonuclease P/MRP subunit (S. cerevisiae) OS=Homo sapiens GN=POP1 PE=2 SV=1	2	168.2	515.8	791.9	POP1	1.53528	0.618506
A0A0C4DG17	40S ribosomal protein SA OS=Homo sapiens GN=RPSA PE=1 SV=1	2	532.1	1262.3	1937.8	RPSA	1.53513	0.618365
B1Q2B0	URCC5 OS=Homo sapiens GN=URCC5 PE=2 SV=1	2	9.6	41.3	63.4	NFXL1	1.53511	0.618341
P46783	40S ribosomal protein S10 OS=Homo sapiens GN=RPS10 PE=1 SV=1	2	474.2	1590.7	2441.1	RPS10	1.53461	0.61787
B3KMC9	cDNA FLJ10711 fis, clone NT2RP3000917, highly similar to 5'-3' exoribonuclease 2 (EC 3.1.11.-) OS=Homo sapiens PE=2 SV=1	2	323.1	334.1	512	XRN2	1.53248	0.615864
B4DWG0	RCC1 and BTB domain-containing protein 2 OS=Homo sapiens GN=RCBTB2 PE=1 SV=1	1	93.9	133.4	204.3	RCBTB2	1.53148	0.614931
P52948	Nuclear pore complex protein Nup98-Nup96 OS=Homo sapiens GN=NUP98 PE=1 SV=4	1	9.6	11.3	17.3	NUP98	1.53097	0.614449
O14578	Citron Rho-interacting kinase OS=Homo sapiens GN=CIT PE=1 SV=2	1	75.2	75.4	115.4	CIT	1.5305	0.614007
A0A024R152	HCG28765, isoform CRA_b OS=Homo sapiens GN=hCG_28765 PE=4 SV=1	1	49.4	103.2	157.9	PALM2-AKAP2	1.53004	0.613568
Q14498	RNA-binding protein 39 OS=Homo sapiens GN=RBM39 PE=1 SV=2	2	903.9	1075.3	1644.9	RBM39	1.52971	0.613261
A0A1B2JLU2	Retinitis pigmentosa 2 OS=Homo sapiens GN=RP2 PE=4 SV=1	1	25	45.5	69.6	RP2	1.52967	0.613221
A2KBC6	Anti-FactorVIII scFv (Fragment) OS=Homo sapiens PE=2 SV=1	1	23.6	30.6	46.8	IGKV3-20	1.52941	0.612977
O43707	Alpha-actinin-4 OS=Homo sapiens GN=ACTN4 PE=1 SV=2	2	3425	4018.3	6145.1	ACTN4	1.52928	0.612851
A0A1X7SBS4	Transcriptional enhancer factor TEF-5 OS=Homo sapiens GN=TEAD3 PE=1 SV=1	2	174.8	15.7	24		1.52866	0.61227
X5DR09	General transcription factor IIi isoform A (Fragment) OS=Homo sapiens GN=GTF2I PE=2 SV=1	2	406.5	398.8	609.2	GTF2I	1.52758	0.611251
Q6IAX2	RPL21 protein OS=Homo sapiens GN=RPL21 PE=2 SV=1	2	340	2771.7	4227.4	RPL21	1.5252	0.609
Q13257	Mitotic spindle assembly checkpoint protein MAD2A OS=Homo sapiens GN=MAD2L1 PE=1 SV=1	1	23.7	27.8	42.4	MAD2L1	1.52518	0.608979
B7ZLQ5	Probable global transcription activator SNF2L1 OS=Homo sapiens GN=SMARCA1 PE=1 SV=1	1	80.4	169	257.7	SMARCA1	1.52485	0.608669
A0MNN4	CDW3/SMU1 OS=Homo sapiens GN=SMU1 PE=2 SV=1	2	46	98.7	150.4	SMU1	1.52381	0.607683
F5H6H0	High mobility group protein HMGI-C OS=Homo sapiens GN=HMGA2 PE=1 SV=1	2	135.6	785.6	1196.2	HMGA2	1.52266	0.606592
A0A024R2M8	Xeroderma pigmentosum, complementation group C, isoform CRA_a OS=Homo sapiens GN=XPC PE=4 SV=1	2	122.9	556.2	846.7	XPC	1.52229	0.606247
Q53Z07	NPC-A-16 OS=Homo sapiens GN=RPL9 PE=2 SV=1	2	233.7	1273.1	1937.9	RPL9	1.52219	0.606148
Q08AM6	Protein VAC14 homolog OS=Homo sapiens GN=VAC14 PE=1 SV=1	2	11.9	21.5	32.7	VAC14	1.52093	0.604954
Q13435	Splicing factor 3B subunit 2 OS=Homo sapiens GN=SF3B2 PE=1 SV=2	2	353.2	658.8	1001	SF3B2	1.51943	0.60353
Q9NTI5	Sister chromatid cohesion protein PDS5 homolog B OS=Homo sapiens GN=PDS5B PE=1 SV=1	1	73.3	208.8	317.2	PDS5B	1.51916	0.603271
Q4LE64	NUMA1 variant protein (Fragment) OS=Homo sapiens GN=NUMA1 variant protein PE=2 SV=1	2	746.2	1571.5	2387.2	NUMA1	1.51906	0.603177
P11940	Polyadenylate-binding protein 1 OS=Homo sapiens GN=PABPC1 PE=1 SV=2	2	1318	3796	5764.6	PABPC1	1.5186	0.602741
P49750	YLP motif-containing protein 1 OS=Homo sapiens GN=YLPM1 PE=1 SV=3	2	237.6	549.7	834.7	YLPM1	1.51846	0.602613
O14786	Neuropilin-1 OS=Homo sapiens GN=NRP1 PE=1 SV=3	2	105.5	291	441.8	NRP1	1.51821	0.602374
Q14151	Scaffold attachment factor B2 OS=Homo sapiens GN=SAFB2 PE=1 SV=1	1	136.8	233.9	355.1	SAFB2	1.51817	0.602333
A0A0S2Z4B3	RNA binding motif single stranded interacting protein 1 isoform 2 (Fragment) OS=Homo sapiens GN=RBMS1 PE=2 SV=1	1	38.1	163.1	247.6	RBMS1	1.51809	0.602255
Q12788	Transducin beta-like protein 3 OS=Homo sapiens GN=TBL3 PE=1 SV=2	1	50.4	158.8	240.8	TBL3	1.51637	0.600624
A0A0U1RRM4	Polypyrimidine tract-binding protein 1 OS=Homo sapiens GN=PTBP1 PE=1 SV=1	2	216.1	379.1	574.8		1.51622	0.600482
P53804	E3 ubiquitin-protein ligase TTC3 OS=Homo sapiens GN=TTC3 PE=1 SV=2	1	8.8	78.8	119.4	TTC3	1.51523	0.599535
B3KY60	cDNA FLJ16777 fis, clone BRHIP2029567, highly similar to Cell division cycle 5-like protein OS=Homo sapiens PE=2 SV=1	2	41.1	199.8	302.5	CDC5L	1.51401	0.598379
Q14966	Zinc finger protein 638 OS=Homo sapiens GN=ZNF638 PE=1 SV=2	1	20.6	50.6	76.6	ZNF638	1.51383	0.598207
Q96ST3	Paired amphipathic helix protein Sin3a OS=Homo sapiens GN=SIN3A PE=1 SV=2	1	80.2	195.2	295.5	SIN3A	1.51383	0.598205
B3KNS8	cDNA FLJ30322 fis, clone BRACE2006703, highly similar to Surfeit locus protein 6 OS=Homo sapiens PE=2 SV=1	1	43.5	138.1	209	SURF6	1.5134	0.59779
Q6NVC0	SLC25A5 protein (Fragment) OS=Homo sapiens GN=SLC25A5 PE=2 SV=1	2	501.6	1280.6	1937.4	SLC25A5	1.51288	0.597302
Q9BQG0	Myb-binding protein 1A OS=Homo sapiens GN=MYBBP1A PE=1 SV=2	2	227	503	760.8	MYBBP1A	1.51252	0.596959
Q14690	Protein RRP5 homolog OS=Homo sapiens GN=PDCD11 PE=1 SV=3	2	214.5	559.3	845.6	PDCD11	1.51189	0.596353
A0A024R608	Ribosomal protein, large, P1, isoform CRA_a OS=Homo sapiens GN=RPLP1 PE=3 SV=1	2	16	293.9	444	RPLP1	1.51072	0.595234
Q68D10	Protein SPT2 homolog OS=Homo sapiens GN=SPTY2D1 PE=1 SV=3	1	21.2	35.1	53	SPTY2D1	1.50997	0.594521
A8K6U2	cDNA FLJ78675, highly similar to Homo sapiens stroma HMG-box containing protein (HBP2) mRNA OS=Homo sapiens PE=2 SV=1	2	41.1	185.7	280.4	BBX	1.50996	0.594513
A0A0J9YXJ0	CUGBP Elav-like family member 2 OS=Homo sapiens GN=CELF2 PE=1 SV=1	1	149.2	256.7	387	CELF2	1.5076	0.59225
P62312	U6 snRNA-associated Sm-like protein LSm6 OS=Homo sapiens GN=LSM6 PE=1 SV=1	2	33.1	113.1	170.4	LSM6	1.50663	0.591326
Q15072	Zinc finger protein OZF OS=Homo sapiens GN=ZNF146 PE=1 SV=2	1	34	101.1	152.1	ZNF146	1.50445	0.589237
Q13315	Serine-protein kinase ATM OS=Homo sapiens GN=ATM PE=1 SV=4	1	27.8	47	70.7	ATM	1.50426	0.589049
P62263	40S ribosomal protein S14 OS=Homo sapiens GN=RPS14 PE=1 SV=3	2	245.4	1131	1699.8	RPS14	1.50292	0.587766
P05114	Non-histone chromosomal protein HMG-14 OS=Homo sapiens GN=HMGN1 PE=1 SV=3	2	40.8	71.4	107.2	HMGN1	1.5014	0.586309
Q14D04	Ventricular zone-expressed PH domain-containing protein homolog 1 OS=Homo sapiens GN=VEPH1 PE=2 SV=1	2	19.9	50.3	75.5	VEPH1	1.50099	0.585918
Q8WWK9	Cytoskeleton-associated protein 2 OS=Homo sapiens GN=CKAP2 PE=1 SV=1	1	24.6	55.3	83	CKAP2	1.5009	0.585832
P62888	60S ribosomal protein L30 OS=Homo sapiens GN=RPL30 PE=1 SV=2	2	324.8	3237.7	4858.3	RPL30	1.50054	0.585482
Q69YN4	Protein virilizer homolog OS=Homo sapiens GN=KIAA1429 PE=1 SV=2	1	99.4	578.4	867.4	KIAA1429; VIRMA	1.49965	0.58463
Q96T37	Putative RNA-binding protein 15 OS=Homo sapiens GN=RBM15 PE=1 SV=2	2	95.6	345.9	518.7	RBM15	1.49957	0.584545
Q1KMD3	Heterogeneous nuclear ribonucleoprotein U-like protein 2 OS=Homo sapiens GN=HNRNPUL2 PE=1 SV=1	2	141.6	311.5	466.9	HNRNPUL2	1.49888	0.583881
Q92769	Histone deacetylase 2 OS=Homo sapiens GN=HDAC2 PE=1 SV=2	2	143.9	398	596.3	HDAC2	1.49824	0.58327
O00159	Unconventional myosin-Ic OS=Homo sapiens GN=MYO1C PE=1 SV=4	2	417.6	786.8	1178.8	MYO1C	1.49822	0.58325
Q15717	ELAV-like protein 1 OS=Homo sapiens GN=ELAVL1 PE=1 SV=2	2	155	356.2	533.5	ELAVL1	1.49775	0.582801
O95343	Homeobox protein SIX3 OS=Homo sapiens GN=SIX3 PE=1 SV=1	2	23	129.3	193.5	SIX3	1.49652	0.581611
A0A087X1R1	Smoothelin OS=Homo sapiens GN=SMTN PE=1 SV=1	2	77.2	111.7	167.1	SMTN	1.49597	0.581083
Q8N4C8	Misshapen-like kinase 1 OS=Homo sapiens GN=MINK1 PE=1 SV=2	1	184.7	233.7	349.6	MINK1	1.49593	0.581047
Q7KZ85	Transcription elongation factor SPT6 OS=Homo sapiens GN=SUPT6H PE=1 SV=2	2	38	47.4	70.9	SUPT6H	1.49578	0.580899
B2RAU5	Sorting nexin OS=Homo sapiens PE=2 SV=1	2	591.7	766.9	1146.1	SNX9	1.49446	0.579623
B4DRS6	Sideroflexin OS=Homo sapiens PE=2 SV=1	2	175.4	342	511	SFXN3	1.49415	0.579327
A0A1B0GUW5	RNA-binding motif, single-stranded-interacting protein 3 (Fragment) OS=Homo sapiens GN=RBMS3 PE=1 SV=1	2	23.3	58.2	86.9		1.49313	0.578337
B2R9X3	cDNA, FLJ94599, highly similar to Homo sapiens GDP-mannose 4,6-dehydratase (GMDS), mRNA OS=Homo sapiens PE=2 SV=1	2	50	80.2	119.7	GMDS	1.49252	0.577749
H0YDD8	60S acidic ribosomal protein P2 (Fragment) OS=Homo sapiens GN=RPLP2 PE=1 SV=1	2	6.9	31.7	47.3		1.49211	0.577357
O75694	Nuclear pore complex protein Nup155 OS=Homo sapiens GN=NUP155 PE=1 SV=1	2	44.6	70.4	105	NUP155	1.49148	0.576742
O75616	GTPase Era, mitochondrial OS=Homo sapiens GN=ERAL1 PE=1 SV=2	2	13.4	37.5	55.9	ERAL1	1.49067	0.575958
P05387	60S acidic ribosomal protein P2 OS=Homo sapiens GN=RPLP2 PE=1 SV=1	2	105.7	1534.3	2284.6	RPLP2	1.48902	0.574361
Q13838	Spliceosome RNA helicase DDX39B OS=Homo sapiens GN=DDX39B PE=1 SV=1	2	375.8	575.2	856.1	DDX39B	1.48835	0.573716
P23396	40S ribosomal protein S3 OS=Homo sapiens GN=RPS3 PE=1 SV=2	2	1317	7114.2	10587.9	RPS3	1.48828	0.573643
P62249	40S ribosomal protein S16 OS=Homo sapiens GN=RPS16 PE=1 SV=2	2	615.1	1923.1	2860.6	RPS16	1.48749	0.572884
P52298	Nuclear cap-binding protein subunit 2 OS=Homo sapiens GN=NCBP2 PE=1 SV=1	2	38.6	70.4	104.6	NCBP2	1.4858	0.571236
A8K946	mRNA cap guanine-N7 methyltransferase OS=Homo sapiens PE=2 SV=1	2	188.9	314.1	466.6	RNMT	1.48551	0.570962
B3KNC3	cDNA FLJ14222 fis, clone NT2RP3003992, highly similar to Nucleolar complex protein 2 homolog OS=Homo sapiens PE=2 SV=1	1	14.5	37.8	56.1	NOC2L	1.48413	0.569615
O60264	SWI/SNF-related matrix-associated actin-dependent regulator of chromatin subfamily A member 5 OS=Homo sapiens GN=SMARCA5 PE=1 SV=1	2	137.4	404.4	600.1	SMARCA5	1.48393	0.56942
A8K588	cDNA FLJ76823, highly similar to Homo sapiens splicing factor, arginine/serine-rich 6 (SFRS6), mRNA OS=Homo sapiens PE=2 SV=1	2	17.6	55.1	81.7	SRSF6	1.48276	0.568284
V9HWG3	Epididymis secretory protein Li 45 OS=Homo sapiens GN=HEL-S-45 PE=2 SV=1	2	1207.2	2182.1	3229.7	TGM2	1.48009	0.565683
O60832	H/ACA ribonucleoprotein complex subunit 4 OS=Homo sapiens GN=DKC1 PE=1 SV=3	2	170.1	782.6	1158	DKC1	1.47968	0.565288
Q9H8M2	Bromodomain-containing protein 9 OS=Homo sapiens GN=BRD9 PE=1 SV=2	1	31.2	45.5	67.3	BRD9	1.47912	0.56474
P11388	DNA topoisomerase 2-alpha OS=Homo sapiens GN=TOP2A PE=1 SV=3	2	525.7	1000.6	1478.2	TOP2A	1.47731	0.562976
B2RNR6	Zinc finger RNA binding protein OS=Homo sapiens GN=ZFR PE=2 SV=1	2	160	609.3	899.5	ZFR	1.47628	0.561971
A8K9U6	cDNA FLJ76121, highly similar to Homo sapiens zinc finger CCCH-type, antiviral 1 (ZC3HAV1), transcript variant 1, mRNA OS=Homo sapiens PE=2 SV=1	2	20.9	69.3	102.3	ZC3HAV1	1.47619	0.561879
P21796	Voltage-dependent anion-selective channel protein 1 OS=Homo sapiens GN=VDAC1 PE=1 SV=2	2	20.6	40.8	60.2	VDAC1	1.47549	0.561194
P62244	40S ribosomal protein S15a OS=Homo sapiens GN=RPS15A PE=1 SV=2	1	320.2	1695	2500.4	RPS15A	1.47516	0.560874
Q96QR8	Transcriptional activator protein Pur-beta OS=Homo sapiens GN=PURB PE=1 SV=3	2	97.9	571.5	843	PURB	1.47507	0.560779
Q9UIG0	Tyrosine-protein kinase BAZ1B OS=Homo sapiens GN=BAZ1B PE=1 SV=2	1	48.6	158.4	233.6	BAZ1B	1.47475	0.560468
P19338	Nucleolin OS=Homo sapiens GN=NCL PE=1 SV=3	2	1667.5	13355.9	19686.9	NCL	1.47402	0.559759
Q8IXT5	RNA-binding protein 12B OS=Homo sapiens GN=RBM12B PE=1 SV=2	1	68.7	84.3	124.2	RBM12B	1.47331	0.559061
A0A087WUS0	40S ribosomal protein S24 OS=Homo sapiens GN=RPS24 PE=1 SV=1	2	325.7	1711.2	2518.2		1.4716	0.557384
A0A140VKA9	Testis secretory sperm-binding protein Li 236P OS=Homo sapiens PE=2 SV=1	2	48.6	68	100	QDPR	1.47059	0.556393
Q96SU4	Oxysterol-binding protein-related protein 9 OS=Homo sapiens GN=OSBPL9 PE=1 SV=2	2	42.3	45.4	66.7	OSBPL9	1.46916	0.554994
A8K0B9	rRNA adenine N(6)-methyltransferase OS=Homo sapiens PE=2 SV=1	2	10.5	46.9	68.9	TFB1M	1.46908	0.554916
B7Z7F0	cDNA FLJ56420, highly similar to Aspartyl aminopeptidase (EC 3.4.11.21) OS=Homo sapiens PE=2 SV=1	2	96.4	106	155.7	DNPEP	1.46887	0.554705
C9JA08	60S ribosomal export protein NMD3 OS=Homo sapiens GN=NMD3 PE=1 SV=1	1	18.4	27.2	39.9	NMD3	1.46691	0.552782
P42677	40S ribosomal protein S27 OS=Homo sapiens GN=RPS27 PE=1 SV=3	2	184.6	1169.2	1712.8	RPS27	1.46493	0.550835
P38117	Electron transfer flavoprotein subunit beta OS=Homo sapiens GN=ETFB PE=1 SV=3	2	10.1	32.5	47.6	ETFB	1.46462	0.550522
A0A024QZW2	Nucleolar protein 7, 27kDa, isoform CRA_a OS=Homo sapiens GN=NOL7 PE=4 SV=1	1	30.8	36.2	53	NOL7	1.46409	0.550003
Q53G26	DnaJ (Hsp40) homolog, subfamily A, member 3 variant (Fragment) OS=Homo sapiens GN=DNAJA3 PE=1 SV=1	2	295.3	463.1	677.2	DNAJA3	1.46232	0.548258
P61962	DDB1- and CUL4-associated factor 7 OS=Homo sapiens GN=DCAF7 PE=1 SV=1	1	12.9	14.3	20.9	DCAF7	1.46154	0.547488
Q9BY44	Eukaryotic translation initiation factor 2A OS=Homo sapiens GN=EIF2A PE=1 SV=3	2	279.7	661.2	965.2	EIF2A	1.45977	0.545741
B7Z5X9	cDNA FLJ55043, highly similar to PDZ domain-containing RING finger protein 3 OS=Homo sapiens PE=2 SV=1	1	41.2	66.7	97.3	PDZRN3	1.45877	0.544753
A0A0A0MTH3	Integrin-linked protein kinase OS=Homo sapiens GN=ILK PE=1 SV=1	2	28.7	38.8	56.6		1.45876	0.544745
Q92621	Nuclear pore complex protein Nup205 OS=Homo sapiens GN=NUP205 PE=1 SV=3	1	107	187.9	274.1	NUP205	1.45875	0.544737
Q6R327	Rapamycin-insensitive companion of mTOR OS=Homo sapiens GN=RICTOR PE=1 SV=1	1	84.7	148.7	216.8	RICTOR	1.45797	0.54396
A0A024R2N6	Natural killer-tumor recognition sequence, isoform CRA_a OS=Homo sapiens GN=NKTR PE=4 SV=1	1	67.9	412.1	600.7	NKTR	1.45766	0.54365
Q6AWA4	Uncharacterized protein DKFZp686O0870 (Fragment) OS=Homo sapiens GN=DKFZp686O0870 PE=2 SV=1	1	62.1	157.7	229.8	GTF3C1	1.4572	0.543196
P61247	40S ribosomal protein S3a OS=Homo sapiens GN=RPS3A PE=1 SV=2	2	837.7	5436.9	7921	RPS3A	1.4569	0.542898
B2R791	cDNA, FLJ93335, highly similar to Homo sapiens PRP3 pre-mRNA processing factor 3 homolog (yeast) (PRPF3), mRNA OS=Homo sapiens PE=2 SV=1	1	32.9	55.9	81.4	PRPF3	1.45617	0.542181
Q96GM8	Target of EGR1 protein 1 OS=Homo sapiens GN=TOE1 PE=1 SV=1	2	124.5	288.5	420.1	TOE1	1.45615	0.542161
Q9BTV4	Transmembrane protein 43 OS=Homo sapiens GN=TMEM43 PE=1 SV=1	2	16.8	25.9	37.7	TMEM43	1.4556	0.541612
Q9BT40	Inositol polyphosphate 5-phosphatase K OS=Homo sapiens GN=INPP5K PE=1 SV=3	2	38.3	88.5	128.8	INPP5K	1.45537	0.541383
B3KQQ3	cDNA PSEC0016 fis, clone NT2RM1001076, highly similar to Procollagen-lysine,2-oxoglutarate 5-dioxygenase 3 (EC 1.14.11.4) OS=Homo sapiens PE=2 SV=1	2	27.4	74.5	108.4	PLOD3	1.45503	0.541052
O15042	U2 snRNP-associated SURP motif-containing protein OS=Homo sapiens GN=U2SURP PE=1 SV=2	2	182	374.3	544.4	U2SURP	1.45445	0.540472
P49711	Transcriptional repressor CTCF OS=Homo sapiens GN=CTCF PE=1 SV=1	1	35.6	177.8	258.3	CTCF	1.45276	0.538792
Q5SSJ5	Heterochromatin protein 1-binding protein 3 OS=Homo sapiens GN=HP1BP3 PE=1 SV=1	2	268.2	1326.8	1927.5	HP1BP3	1.45274	0.53878
Q9BU76	Multiple myeloma tumor-associated protein 2 OS=Homo sapiens GN=MMTAG2 PE=1 SV=1	2	459.1	728.9	1058.6	C1orf35	1.45233	0.538365
J3QK89	Calcium homeostasis endoplasmic reticulum protein OS=Homo sapiens GN=CHERP PE=1 SV=1	1	187	334.1	485.2	CHERP	1.45226	0.5383
A0A024RAE1	Ribosome assembly factor mrt4 OS=Homo sapiens GN=C1orf33 PE=3 SV=1	2	15.7	62.6	90.9	MRTO4	1.45208	0.538118
Q8N4T8	Carbonyl reductase family member 4 OS=Homo sapiens GN=CBR4 PE=1 SV=3	1	18.9	31.2	45.3	CBR4	1.45192	0.537965
Q8IY37	Probable ATP-dependent RNA helicase DHX37 OS=Homo sapiens GN=DHX37 PE=1 SV=1	1	13.5	39	56.6	DHX37	1.45128	0.537328
P24928	DNA-directed RNA polymerase II subunit RPB1 OS=Homo sapiens GN=POLR2A PE=1 SV=2	1	253.4	563.6	817.9	POLR2A	1.45121	0.537253
Q58FF9	Heat shock protein 90Af OS=Homo sapiens GN=HSP90Af PE=2 SV=1	1	8.9	88.5	128.4	HSP90AA6P	1.45085	0.536896
Q96IZ7	Serine/Arginine-related protein 53 OS=Homo sapiens GN=RSRC1 PE=1 SV=1	1	73.8	99.3	144	RSRC1	1.45015	0.536203
Q9UGP4	LIM domain-containing protein 1 OS=Homo sapiens GN=LIMD1 PE=1 SV=1	2	7	12	17.4	LIMD1	1.45	0.536053
P51955	Serine/threonine-protein kinase Nek2 OS=Homo sapiens GN=NEK2 PE=1 SV=1	1		242.5	351.5	NEK2	1.44948	0.53554
Q02543	60S ribosomal protein L18a OS=Homo sapiens GN=RPL18A PE=1 SV=2	2	300.9	2929.2	4245.2	RPL18A	1.44927	0.535326
P67809	Nuclease-sensitive element-binding protein 1 OS=Homo sapiens GN=YBX1 PE=1 SV=3	2	385.1	1320.7	1913.9	YBX1	1.44916	0.535213
P25490	Transcriptional repressor protein YY1 OS=Homo sapiens GN=YY1 PE=1 SV=2	2	21.3	57.5	83.3	YY1	1.4487	0.534755
P49458	Signal recognition particle 9 kDa protein OS=Homo sapiens GN=SRP9 PE=1 SV=2	2	100.9	1119.7	1621.7	SRP9; SRP9P1	1.44833	0.534395
P62424	60S ribosomal protein L7a OS=Homo sapiens GN=RPL7A PE=1 SV=2	2	805	7252.3	10497	RPL7A	1.4474	0.533467
F8W727	60S ribosomal protein L32 OS=Homo sapiens GN=RPL32 PE=1 SV=1	2	207.1	1528.4	2211.4		1.44687	0.532938
E7ETM0	Casein kinase I isoform alpha OS=Homo sapiens GN=CSNK1A1 PE=1 SV=1	2	12	35.9	51.9		1.44568	0.531751
B2R5T2	cDNA, FLJ92608, highly similar to Homo sapiens aldehyde dehydrogenase 1 family, member A3 (ALDH1A3), mRNA OS=Homo sapiens PE=2 SV=1	2	262.9	438.9	634.5	ALDH1A3	1.44566	0.531728
Q9NYU1	UDP-glucose:glycoprotein glucosyltransferase 2 OS=Homo sapiens GN=UGGT2 PE=1 SV=4	2	20.2	46.9	67.8	UGGT2	1.44563	0.531697
Q7Z5K2	Wings apart-like protein homolog OS=Homo sapiens GN=WAPL PE=1 SV=1	2	40.2	76.3	110.3	WAPAL; WAPL	1.44561	0.531678
Q8IY17	Neuropathy target esterase OS=Homo sapiens GN=PNPLA6 PE=1 SV=2	2	33.4	131.1	189.3	PNPLA6	1.44394	0.530007
Q9NYU2	UDP-glucose:glycoprotein glucosyltransferase 1 OS=Homo sapiens GN=UGGT1 PE=1 SV=3	2	626.4	1423.2	2053.6	UGGT1	1.44295	0.529017
A0A024R0Z3	DEAD (Asp-Glu-Ala-Asp) box polypeptide 23, isoform CRA_b OS=Homo sapiens GN=DDX23 PE=4 SV=1	2	51.5	100.5	145	DDX23	1.44279	0.528857
B2RA03	cDNA, FLJ94640, highly similar to Homo sapiens keratin 18 (KRT18), mRNA OS=Homo sapiens PE=2 SV=1	2	719.1	1523.9	2197.8	KRT18	1.44222	0.528292
Q9H1B7	Interferon regulatory factor 2-binding protein-like OS=Homo sapiens GN=IRF2BPL PE=1 SV=1	2	34.6	88.1	127	IRF2BPL	1.44154	0.527615
A0A024R4E1	Nicotinamide-nucleotide adenylyltransferase OS=Homo sapiens GN=NMNAT1 PE=3 SV=1	1	10.7	72.1	103.9	NMNAT1	1.44105	0.527124
Q6PCB5	Round spermatid basic protein 1-like protein OS=Homo sapiens GN=RSBN1L PE=1 SV=2	1	22.9	48.1	69.3	RSBN1L	1.44075	0.526818
Q16626	Male-enhanced antigen 1 OS=Homo sapiens GN=MEA1 PE=1 SV=2	1	11.2	19.8	28.5	MEA1	1.43939	0.525461
P62269	40S ribosomal protein S18 OS=Homo sapiens GN=RPS18 PE=1 SV=3	2	85.6	299.1	430.5	RPS18	1.43932	0.525385
Q7Z6B7	SLIT-ROBO Rho GTPase-activating protein 1 OS=Homo sapiens GN=SRGAP1 PE=1 SV=1	1	15.3	39.4	56.7	SRGAP1	1.43909	0.525153
D3DR65	SPFH domain family, member 1, isoform CRA_a OS=Homo sapiens GN=SPFH1 PE=4 SV=1	2	175.3	401.1	577	ERLIN1	1.43854	0.524609
A0A087WZT3	BolA-like protein 2 OS=Homo sapiens GN=BOLA2 PE=1 SV=2	2	36.5	54.9	78.9	LOC101060252; BOLA2; BOLA2B; LOC102725214; LOC107984053	1.43716	0.523219
Q9UNX3	60S ribosomal protein L26-like 1 OS=Homo sapiens GN=RPL26L1 PE=1 SV=1	2	25	159.8	229.6	RPL26L1	1.4368	0.522855
Q9BX10	GTP-binding protein 2 OS=Homo sapiens GN=GTPBP2 PE=1 SV=1	1	6.4	21.3	30.6	GTPBP2	1.43662	0.522678
Q5VWZ2	Lysophospholipase-like protein 1 OS=Homo sapiens GN=LYPLAL1 PE=1 SV=3	1	14	29.1	41.8	LYPLAL1	1.43643	0.522484
Q86TB9	Protein PAT1 homolog 1 OS=Homo sapiens GN=PATL1 PE=1 SV=2	1	54.8	175.1	251.4	PATL1	1.43575	0.521806
Q9Y3C6	Peptidyl-prolyl cis-trans isomerase-like 1 OS=Homo sapiens GN=PPIL1 PE=1 SV=1	2	40.6	59.5	85.4	PPIL1	1.43529	0.521346
Q6MZP3	Uncharacterized protein DKFZp686I05169 OS=Homo sapiens GN=DKFZp686I05169 PE=2 SV=1	1	37.1	49.2	70.6	STAG2	1.43496	0.52101
Q9BRJ6	Uncharacterized protein C7orf50 OS=Homo sapiens GN=C7orf50 PE=1 SV=1	2	114.8	1174.4	1684.8	C7orf50	1.4346	0.520653
A0A0A0MTL6	Rho family-interacting cell polarization regulator 1 OS=Homo sapiens GN=RIPOR1 PE=1 SV=1	1	32.5	45.8	65.7	FAM65A; RIPOR1	1.4345	0.520546
A0A024R5U8	Chromosome 15 open reading frame 15, isoform CRA_a OS=Homo sapiens GN=C15orf15 PE=3 SV=1	1	28.3	87.5	125.5	RSL24D1	1.43429	0.520332
Q14669	E3 ubiquitin-protein ligase TRIP12 OS=Homo sapiens GN=TRIP12 PE=1 SV=1	2	186.9	593	849.9	TRIP12	1.43322	0.519261
A8K8B2	cDNA FLJ78127, highly similar to Homo sapiens SFRS protein kinase 1 (SRPK1), mRNA OS=Homo sapiens PE=2 SV=1	2	380.7	3837.9	5500.2	SRPK1	1.43313	0.519167
P05787	Keratin, type II cytoskeletal 8 OS=Homo sapiens GN=KRT8 PE=1 SV=7	2	1049.2	2023.7	2900.2	KRT8	1.43312	0.519157
P14854	Cytochrome c oxidase subunit 6B1 OS=Homo sapiens GN=COX6B1 PE=1 SV=2	2	6.2	12.7	18.2	COX6B1	1.43307	0.51911
A8K7V1	cDNA FLJ78053, highly similar to Homo sapiens splicing factor 3a, subunit 3, 60kDa (SF3A3), mRNA OS=Homo sapiens PE=2 SV=1	2	47.9	70.2	100.6	SF3A3	1.43305	0.519087
Q14554	Protein disulfide-isomerase A5 OS=Homo sapiens GN=PDIA5 PE=1 SV=1	1	8	33.3	47.7	PDIA5	1.43243	0.518467
Q63ZY3	KN motif and ankyrin repeat domain-containing protein 2 OS=Homo sapiens GN=KANK2 PE=1 SV=1	2	357.5	1097.6	1570.3	KANK2	1.43067	0.516688
Q9UFW8	CGG triplet repeat-binding protein 1 OS=Homo sapiens GN=CGGBP1 PE=1 SV=2	2	18.9	58.3	83.4	CGGBP1	1.43053	0.516552
Q99543	DnaJ homolog subfamily C member 2 OS=Homo sapiens GN=DNAJC2 PE=1 SV=4	2	25.4	114.4	163.6	DNAJC2	1.43007	0.516086
Q96ME7	Zinc finger protein 512 OS=Homo sapiens GN=ZNF512 PE=1 SV=2	2	30.4	244.8	349.8	ZNF512	1.42892	0.514927
P40429	60S ribosomal protein L13a OS=Homo sapiens GN=RPL13A PE=1 SV=2	1	374.4	3808.4	5441.3	RPL13A	1.42876	0.514766
Q8IWZ6	Bardet-Biedl syndrome 7 protein OS=Homo sapiens GN=BBS7 PE=1 SV=2	1	34.5	166.9	238.3	BBS7	1.4278	0.513795
Q99496	E3 ubiquitin-protein ligase RING2 OS=Homo sapiens GN=RNF2 PE=1 SV=1	1	31.4	51.7	73.8	RNF2	1.42747	0.513457
Q14587	Zinc finger protein 268 OS=Homo sapiens GN=ZNF268 PE=1 SV=2	1	11.1	122.4	174.7	ZNF268	1.42729	0.513276
P18583	Protein SON OS=Homo sapiens GN=SON PE=1 SV=4	2	214.5	358.9	512.2	SON	1.42714	0.513125
B2RWN5	HEAT repeat containing 1 OS=Homo sapiens GN=HEATR1 PE=2 SV=1	1	7.1	25.3	36.1	HEATR1	1.42688	0.512861
P12814	Alpha-actinin-1 OS=Homo sapiens GN=ACTN1 PE=1 SV=2	2	804.2	1056.7	1507.5	ACTN1	1.42661	0.512592
Q6PJV4	THRAP3 protein (Fragment) OS=Homo sapiens GN=THRAP3 PE=2 SV=1	2	21.3	73.5	104.8	THRAP3	1.42585	0.511823
Q86UA1	Pre-mRNA-processing factor 39 OS=Homo sapiens GN=PRPF39 PE=1 SV=3	2	1503.8	1872.9	2670.1	PRPF39	1.42565	0.51162
Q9BRR0	Zinc finger protein with KRAB and SCAN domains 3 OS=Homo sapiens GN=ZKSCAN3 PE=1 SV=2	1	20.9	89.6	127.7	ZKSCAN3	1.42522	0.511188
P0DI83	Ras-related protein Rab-34, isoform NARR OS=Homo sapiens GN=RAB34 PE=1 SV=1	1	15.3	25.9	36.9	NARR; RAB34	1.42471	0.510669
P25686	DnaJ homolog subfamily B member 2 OS=Homo sapiens GN=DNAJB2 PE=1 SV=3	2	38.3	107.2	152.7	DNAJB2	1.42444	0.510395
Q13823	Nucleolar GTP-binding protein 2 OS=Homo sapiens GN=GNL2 PE=1 SV=1	2	23.1	83.2	118.5	GNL2	1.42428	0.510232
A0A024R2Q5	Myosin, light polypeptide 3, alkali ventricular, skeletal, slow, isoform CRA_a OS=Homo sapiens GN=MYL3 PE=4 SV=1	1	14.6	19.1	27.2	MYL3	1.42408	0.510034
Q59EI9	ADP,ATP carrier protein, liver isoform T2 variant (Fragment) OS=Homo sapiens PE=2 SV=1	2	158.7	437.6	623	SLC25A6	1.42367	0.509619
A8K5B6	cDNA FLJ76830, highly similar to Homo sapiens SWI/SNF related, matrix associated, actin dependent regulator of chromatin, subfamily a, member 3 (SMARCA3), transcript variant 1, mRNA OS=Homo sapiens PE=2 SV=1	2	90.1	164.8	234.6	HLTF	1.42354	0.509487
P78527	DNA-dependent protein kinase catalytic subunit OS=Homo sapiens GN=PRKDC PE=1 SV=3	2	3785.4	5619.8	7997.5	PRKDC	1.42309	0.50903
P05161	Ubiquitin-like protein ISG15 OS=Homo sapiens GN=ISG15 PE=1 SV=5	2	30.6	209.1	297.3	ISG15	1.42181	0.507726
Q59F99	Staufen isoform b variant (Fragment) OS=Homo sapiens PE=2 SV=1	2	257.8	1944.7	2764.9	STAU1	1.42176	0.50768
A0A024R6H0	Cleavage and polyadenylation specific factor 2, 100kDa, isoform CRA_a OS=Homo sapiens GN=CPSF2 PE=4 SV=1	1	10.9	28	39.8	CPSF2	1.42143	0.507342
B2R7X3	cDNA, FLJ93645, highly similar to Homo sapiens chromatin assembly factor 1, subunit B (p60) (CHAF1B),mRNA OS=Homo sapiens PE=2 SV=1	1	17.3	38.5	54.7	CHAF1B	1.42078	0.506682
Q8WWQ0	PH-interacting protein OS=Homo sapiens GN=PHIP PE=1 SV=2	1		13.8	19.6	PHIP	1.42029	0.506185
Q8TDY2	RB1-inducible coiled-coil protein 1 OS=Homo sapiens GN=RB1CC1 PE=1 SV=3	2	144.2	735.9	1045	RB1CC1	1.42003	0.505921
Q9UKK3	Poly [ADP-ribose] polymerase 4 OS=Homo sapiens GN=PARP4 PE=1 SV=3	2	4294.8	6556.5	9310.1	PARP4	1.41998	0.505871
Q96HQ2	CDKN2AIP N-terminal-like protein OS=Homo sapiens GN=CDKN2AIPNL PE=1 SV=1	2	22.5	35.5	50.4	CDKN2AIPNL	1.41972	0.505605
Q9UPT8	Zinc finger CCCH domain-containing protein 4 OS=Homo sapiens GN=ZC3H4 PE=1 SV=3	2	126.4	433.3	615.1	ZC3H4	1.41957	0.505455
J3KNN5	Probable ATP-dependent RNA helicase DDX41 (Fragment) OS=Homo sapiens GN=DDX41 PE=1 SV=1	2	1066.7	1878.1	2666		1.41952	0.505403
Q6IA86	Elongator complex protein 2 OS=Homo sapiens GN=ELP2 PE=1 SV=2	2	19.4	23.6	33.5	ELP2	1.41949	0.505374
O00148	ATP-dependent RNA helicase DDX39A OS=Homo sapiens GN=DDX39A PE=1 SV=2	1	125	195.1	276.8	DDX39A	1.41876	0.50463
P60866	40S ribosomal protein S20 OS=Homo sapiens GN=RPS20 PE=1 SV=1	2	77.4	438.2	620.2	RPS20	1.41534	0.501144
P41208	Centrin-2 OS=Homo sapiens GN=CETN2 PE=1 SV=1	2	47	174	246.1	CETN2	1.41437	0.500157
P62913	60S ribosomal protein L11 OS=Homo sapiens GN=RPL11 PE=1 SV=2	2	225.6	1472.5	2082.4	RPL11	1.41419	0.49998
A0A087WY31	YTH domain-containing family protein 3 OS=Homo sapiens GN=YTHDF3 PE=1 SV=1	2	426.7	914.8	1293.3	YTHDF3	1.41375	0.499529
O60583	Cyclin-T2 OS=Homo sapiens GN=CCNT2 PE=1 SV=2	1	13.2	38.5	54.4	CCNT2	1.41299	0.498748
A0A024R6D4	Enhancer of rudimentary homolog OS=Homo sapiens GN=ERH PE=3 SV=1	2	173.3	348.6	492.5	ERH	1.41279	0.498551
Q9UNL2	Translocon-associated protein subunit gamma OS=Homo sapiens GN=SSR3 PE=1 SV=1	1	7.5	11.4	16.1	SSR3	1.41228	0.498027
A0A0S2Z4Z9	Non-POU domain containing octamer-binding isoform 1 (Fragment) OS=Homo sapiens GN=NONO PE=2 SV=1	2	1287.8	2501.4	3529.5	NONO	1.41101	0.496728
H0Y9X1	Translation machinery-associated protein 16 (Fragment) OS=Homo sapiens GN=TMA16 PE=1 SV=1	2	59.7	267	376.5		1.41011	0.49581
P17301	Integrin alpha-2 OS=Homo sapiens GN=ITGA2 PE=1 SV=1	2	9.4	14.2	20	ITGA2	1.40845	0.494109
A0A024R2T6	DEAH (Asp-Glu-Ala-His) box polypeptide 30, isoform CRA_b OS=Homo sapiens GN=DHX30 PE=4 SV=1	2	528.4	2477.6	3487	DHX30	1.40741	0.493043
A0A024QZD9	Zinc finger protein 668, isoform CRA_a OS=Homo sapiens GN=ZNF668 PE=4 SV=1	1	36.1	74.7	105.1	ZNF668	1.40696	0.492583
Q2TBE0	CWF19-like protein 2 OS=Homo sapiens GN=CWF19L2 PE=1 SV=4	2	18.2	31.7	44.6	CWF19L2	1.40694	0.492561
Q86UE4	Protein LYRIC OS=Homo sapiens GN=MTDH PE=1 SV=2	2	325.3	1965.3	2764.9	MTDH	1.40686	0.492478
A0A087WYR3	Tumor protein D54 OS=Homo sapiens GN=TPD52L2 PE=1 SV=1	2	41.4	82.5	116	TPD52L2	1.40606	0.491659
O95453	Poly(A)-specific ribonuclease PARN OS=Homo sapiens GN=PARN PE=1 SV=1	1	22.7	44.6	62.7	PARN	1.40583	0.491422
P23246	Splicing factor, proline- and glutamine-rich OS=Homo sapiens GN=SFPQ PE=1 SV=2	2	1312.9	2344.3	3292.4	SFPQ	1.40443	0.489982
Q59FI9	Ribosomal protein L12 variant (Fragment) OS=Homo sapiens PE=2 SV=1	1	293.7	2258.7	3170.4	RPL12P16	1.40364	0.489172
A0A024R462	Fibronectin 1, isoform CRA_n OS=Homo sapiens GN=FN1 PE=4 SV=1	2	1626	3374.9	4736.6	FN1	1.40348	0.489007
O15160	DNA-directed RNA polymerases I and III subunit RPAC1 OS=Homo sapiens GN=POLR1C PE=1 SV=1	1	26	85.1	119.3	POLR1C	1.40188	0.487363
P35080	Profilin-2 OS=Homo sapiens GN=PFN2 PE=1 SV=3	2	488.1	754.4	1057.3	PFN2	1.40151	0.486983
Q15464	SH2 domain-containing adapter protein B OS=Homo sapiens GN=SHB PE=1 SV=2	1	14.5	18.2	25.5	SHB	1.4011	0.486559
O15446	DNA-directed RNA polymerase I subunit RPA34 OS=Homo sapiens GN=CD3EAP PE=1 SV=1	1	69.5	208.1	291.3	CD3EAP	1.39981	0.485229
Q9Y3M8	StAR-related lipid transfer protein 13 OS=Homo sapiens GN=STARD13 PE=1 SV=2	2	19.8	51.6	72.2	STARD13	1.39922	0.484628
O15231	Zinc finger protein 185 OS=Homo sapiens GN=ZNF185 PE=1 SV=3	2	221.6	430.7	602.6	ZNF185	1.39912	0.484517
A0A0S2Z3H6	Cleft lip and palate associated transmembrane protein 1 isoform 1 (Fragment) OS=Homo sapiens GN=CLPTM1 PE=2 SV=1	1	12.6	20.3	28.4	CLPTM1	1.39901	0.484411
E7EQT4	Apoptotic chromatin condensation inducer in the nucleus OS=Homo sapiens GN=ACIN1 PE=1 SV=2	2	78.8	199.8	279.4		1.3984	0.483775
B4E2S2	Poly [ADP-ribose] polymerase OS=Homo sapiens PE=2 SV=1	2	63.8	96.2	134.5	PARP4	1.39813	0.483497
A0A1B0GUN5	Pleckstrin homology domain-containing family A member 6 OS=Homo sapiens GN=PLEKHA6 PE=1 SV=1	2	9.3	17.1	23.9		1.39766	0.483014
B5BUB5	Autoantigen La (Fragment) OS=Homo sapiens GN=SSB PE=2 SV=1	2	264.6	1298.2	1813.9	SSB	1.39724	0.482582
Q9NV56	MRG/MORF4L-binding protein OS=Homo sapiens GN=MRGBP PE=1 SV=1	1	25.4	69.2	96.6	MRGBP	1.39595	0.481251
Q59HH7	X-ray repair cross complementing protein 1 variant (Fragment) OS=Homo sapiens PE=2 SV=1	2	139.6	248.8	347.3	XRCC1	1.3959	0.481196
Q14257	Reticulocalbin-2 OS=Homo sapiens GN=RCN2 PE=1 SV=1	2	207.4	455.5	634.9	RCN2	1.39385	0.479078
Q96TA1	Niban-like protein 1 OS=Homo sapiens GN=FAM129B PE=1 SV=3	2	195.6	348.9	486.3	FAM129B	1.39381	0.479033
A0A087X0X3	Heterogeneous nuclear ribonucleoprotein M OS=Homo sapiens GN=HNRNPM PE=1 SV=1	2	977.2	2754.2	3838.1		1.39354	0.478759
Q5VW26	Nuclear factor 1 OS=Homo sapiens GN=NFIB PE=1 SV=1	2	57.4	188.2	262.2	NFIB	1.3932	0.478401
Q9NZL4	Hsp70-binding protein 1 OS=Homo sapiens GN=HSPBP1 PE=1 SV=1	1	68.1	289.1	402.7	HSPBP1	1.39294	0.478137
A8K9U0	cDNA FLJ78260, highly similar to Homo sapiens RNA binding motif protein 4, mRNA OS=Homo sapiens PE=2 SV=1	2	109.2	407.8	567.7		1.3921	0.477267
B7ZLW2	HELZ protein OS=Homo sapiens GN=HELZ PE=2 SV=1	1	18.9	31.4	43.7	HELZ	1.39172	0.476869
D3DSW1	HCG1640171, isoform CRA_a OS=Homo sapiens GN=hCG_1640171 PE=4 SV=1	2	77	105	146.1	LOC728024	1.39143	0.476567
Q8N567	Zinc finger CCHC domain-containing protein 9 OS=Homo sapiens GN=ZCCHC9 PE=1 SV=2	1	3.4	36.4	50.6	ZCCHC9	1.39011	0.475199
Q5JR94	40S ribosomal protein S8 OS=Homo sapiens GN=RPS8 PE=2 SV=1	2	390.6	2448.7	3402.6	RPS8	1.38955	0.474622
Q9BRU9	rRNA-processing protein UTP23 homolog OS=Homo sapiens GN=UTP23 PE=1 SV=2	1	50.3	170	236.2	UTP23	1.38941	0.474474
A0A0A0MRH8	Chromodomain-helicase-DNA-binding protein 1-like OS=Homo sapiens GN=CHD1L PE=1 SV=1	1	69	516.9	718	LOC101060601; CHD1L	1.38905	0.474099
Q13813	Spectrin alpha chain, non-erythrocytic 1 OS=Homo sapiens GN=SPTAN1 PE=1 SV=3	2	1630.6	3362.1	4669.9	SPTAN1	1.38898	0.474029
Q9Y4K0	Lysyl oxidase homolog 2 OS=Homo sapiens GN=LOXL2 PE=1 SV=1	2	391.6	459.9	638.7	LOXL2	1.38878	0.473818
A4D1V4	Mitochondrial ribosomal protein L32 OS=Homo sapiens GN=MRPL32 PE=2 SV=1	2	19.6	48.1	66.8	MRPL32	1.38877	0.473811
A0A024R102	SWI/SNF related, matrix associated, actin dependent regulator of chromatin, subfamily d, member 1, isoform CRA_e OS=Homo sapiens GN=SMARCD1 PE=4 SV=1	1	178.6	256.4	355.9	SMARCD1	1.38807	0.473076
Q96JK2	DDB1- and CUL4-associated factor 5 OS=Homo sapiens GN=DCAF5 PE=1 SV=2	2	4.8	356.8	494.8	DCAF5	1.38677	0.47173
Q5C9Z4	Nucleolar MIF4G domain-containing protein 1 OS=Homo sapiens GN=NOM1 PE=1 SV=1	1	15.4	28.2	39.1	NOM1	1.38652	0.471473
Q96RT7	Gamma-tubulin complex component 6 OS=Homo sapiens GN=TUBGCP6 PE=1 SV=3	1	13.2	42.2	58.5	TUBGCP6	1.38626	0.471194
Q59ET0	Glucan, branching enzyme 1 variant (Fragment) OS=Homo sapiens PE=2 SV=1	2	1848	1821.3	2524.6	GBE1	1.38615	0.471086
A0A024R7X7	Staufen, RNA binding protein, homolog 2 (Drosophila), isoform CRA_b OS=Homo sapiens GN=STAU2 PE=4 SV=1	2	111	434.6	601.9	STAU2	1.38495	0.469836
A8K0M6	cDNA FLJ76697 OS=Homo sapiens PE=2 SV=1	1	28.2	49.1	68	TMEM87A	1.38493	0.469812
Q9GZR7	ATP-dependent RNA helicase DDX24 OS=Homo sapiens GN=DDX24 PE=1 SV=1	2	95.5	506.6	701.6	DDX24	1.38492	0.469802
P18077	60S ribosomal protein L35a OS=Homo sapiens GN=RPL35A PE=1 SV=2	2	319.4	2759.4	3819.7	RPL35A	1.38425	0.469105
B2R9Y2	cDNA, FLJ94609 OS=Homo sapiens PE=2 SV=1	2	13.2	31.8	44	NSRP1	1.38365	0.468477
A0A024R9D7	2,4-dienoyl CoA reductase 1, mitochondrial, isoform CRA_b OS=Homo sapiens GN=DECR1 PE=4 SV=1	2	30.7	71.5	98.9	DECR1	1.38322	0.468027
Q8IY81	pre-rRNA processing protein FTSJ3 OS=Homo sapiens GN=FTSJ3 PE=1 SV=2	1	31.9	61.1	84.5	FTSJ3	1.38298	0.467779
Q9Y4G8	Rap guanine nucleotide exchange factor 2 OS=Homo sapiens GN=RAPGEF2 PE=1 SV=1	1	72.5	161.9	223.9	RAPGEF2	1.38295	0.467752
B4DYR8	cDNA FLJ56473, highly similar to Zinc finger and BTB domain-containing protein 38 OS=Homo sapiens PE=2 SV=1	1	24	61.4	84.9	ZBTB38	1.38274	0.467526
Q86X55	Histone-arginine methyltransferase CARM1 OS=Homo sapiens GN=CARM1 PE=1 SV=3	2	723.4	620.3	857.6	CARM1	1.38256	0.467339
A0A090N8P3	Peptidylprolyl isomerase OS=Homo sapiens GN=FKBP9 PE=4 SV=1	2	76.6	137.6	190.2	FKBP9	1.38227	0.467037
B4DXI4	cDNA FLJ52689, highly similar to Homo sapiens mitochondrial ribosomal protein L21 (MRPL21), transcript variant 4, mRNA OS=Homo sapiens PE=2 SV=1	2	16.7	36.9	51	MRPL21	1.38211	0.466876
S6C4S4	IgG H chain OS=Homo sapiens PE=2 SV=1	2	72.9	91.6	126.6		1.3821	0.466858
P42696	RNA-binding protein 34 OS=Homo sapiens GN=RBM34 PE=1 SV=2	1	10.4	35.9	49.6	RBM34	1.38162	0.466356
P35659	Protein DEK OS=Homo sapiens GN=DEK PE=1 SV=1	2	228.6	891.9	1231.7	DEK	1.38098	0.465697
P37108	Signal recognition particle 14 kDa protein OS=Homo sapiens GN=SRP14 PE=1 SV=2	2	60.8	597.4	824.8	SRP14	1.38065	0.465347
P62633	Cellular nucleic acid-binding protein OS=Homo sapiens GN=CNBP PE=1 SV=1	2	199.4	692	955.4	CNBP	1.38064	0.465333
Q9BRX9	WD repeat domain-containing protein 83 OS=Homo sapiens GN=WDR83 PE=1 SV=1	2	32.4	40	55.2	WDR83	1.38	0.464668
Q15363	Transmembrane emp24 domain-containing protein 2 OS=Homo sapiens GN=TMED2 PE=1 SV=1	2	78.9	132.9	183.4	TMED2	1.37998	0.464653
Q15637	Splicing factor 1 OS=Homo sapiens GN=SF1 PE=1 SV=4	2	69.9	105.8	146	SF1	1.37996	0.464629
Q01780	Exosome component 10 OS=Homo sapiens GN=EXOSC10 PE=1 SV=2	2	77.8	181.6	250.6	EXOSC10	1.37996	0.464622
A8K3Y8	cDNA FLJ76141 OS=Homo sapiens PE=2 SV=1	2	45.5	74.1	102.2	MEMO1	1.37922	0.46385
P08237	ATP-dependent 6-phosphofructokinase, muscle type OS=Homo sapiens GN=PFKM PE=1 SV=2	2	69.6	129.4	178.4	PFKM	1.37867	0.463278
A0A087WWK8	IQ motif and SEC7 domain-containing protein 1 OS=Homo sapiens GN=IQSEC1 PE=1 SV=1	1	33.8	129.7	178.8	IQSEC1	1.37857	0.463168
A8K964	cDNA FLJ75071, highly similar to Homo sapiens pinin, desmosome associated protein (PNN), mRNA OS=Homo sapiens PE=2 SV=1	2	376.8	666.2	918.3	PNN	1.37841	0.46301
Q9NV79	Protein-L-isoaspartate O-methyltransferase domain-containing protein 2 OS=Homo sapiens GN=PCMTD2 PE=2 SV=2	2	44.2	72.9	100.4	PCMTD2	1.37723	0.461769
Q59F66	DEAD box polypeptide 17 isoform p82 variant (Fragment) OS=Homo sapiens PE=2 SV=1	2	1421	4087.5	5629	DDX17	1.37713	0.46166
Q92743	Serine protease HTRA1 OS=Homo sapiens GN=HTRA1 PE=1 SV=1	2	49	100.4	138.1	HTRA1	1.3755	0.459954
A0A024R1C1	Peptidylprolyl isomerase (Cyclophilin)-like 2, isoform CRA_b OS=Homo sapiens GN=PPIL2 PE=4 SV=1	1	15.2	27.7	38.1	PPIL2	1.37545	0.459905
Q8WXF1	Paraspeckle component 1 OS=Homo sapiens GN=PSPC1 PE=1 SV=1	2	274.6	640.6	880.9	PSPC1	1.37512	0.459554
P62906	60S ribosomal protein L10a OS=Homo sapiens GN=RPL10A PE=1 SV=2	2	649.2	6300.7	8664.2	RPL10A	1.37512	0.459554
A0A024R7F9	Glutaryl-Coenzyme A dehydrogenase, isoform CRA_a OS=Homo sapiens GN=GCDH PE=3 SV=1	1	107.5	127.2	174.9	GCDH	1.375	0.459432
P46459	Vesicle-fusing ATPase OS=Homo sapiens GN=NSF PE=1 SV=3	2	16.4	21.6	29.7	NSF	1.375	0.459432
P09382	Galectin-1 OS=Homo sapiens GN=LGALS1 PE=1 SV=2	2	210	392.9	540.1	LGALS1	1.37465	0.459064
A8K7Z3	cDNA FLJ77229, highly similar to Homo sapiens GRIP1 associated protein 1 (GRIPAP1), transcript variant 1, mRNA OS=Homo sapiens PE=2 SV=1	1	15	29.9	41.1	GRIPAP1	1.37458	0.458993
A0A024QZF1	HCG19665, isoform CRA_a OS=Homo sapiens GN=hCG_19665 PE=4 SV=1	2	40.3	37.7	51.8	NUP62	1.37401	0.458388
A0A0G2JL56	HLA class I histocompatibility antigen, A-3 alpha chain OS=Homo sapiens GN=HLA-A PE=1 SV=1	2	55.3	86.1	118.3		1.37398	0.458365
Q8TBM8	DnaJ homolog subfamily B member 14 OS=Homo sapiens GN=DNAJB14 PE=1 SV=1	2	11.2	68.5	94.1	DNAJB14	1.37372	0.458091
Q6UN15	Pre-mRNA 3'-end-processing factor FIP1 OS=Homo sapiens GN=FIP1L1 PE=1 SV=1	1	86.2	152.9	210	FIP1L1	1.37345	0.457801
A7BI36	p180/ribosome receptor OS=Homo sapiens GN=RRBP1 PE=2 SV=2	2	1607.4	8847	12150.8	RRBP1	1.37344	0.457791
P0C7X5	Zinc finger protein 806 OS=Homo sapiens GN=ZNF806 PE=3 SV=1	1	59.6	411.8	565.5	ZNF806	1.37324	0.457583
P39023	60S ribosomal protein L3 OS=Homo sapiens GN=RPL3 PE=1 SV=2	2	722.9	7010.9	9626.8	RPL3	1.37312	0.457457
D3DQM9	Cytoplasmic polyadenylation element binding protein 4, isoform CRA_b OS=Homo sapiens GN=CPEB4 PE=4 SV=1	1	370.5	646.4	887.5	CPEB4	1.37299	0.45732
A3F768	NF-kappaB repressing factor OS=Homo sapiens GN=NRF PE=2 SV=1	1	102	242	332.2	NKRF	1.37273	0.457045
O75151	Lysine-specific demethylase PHF2 OS=Homo sapiens GN=PHF2 PE=1 SV=4	1	182.3	212.6	291.7	PHF2	1.37206	0.456344
Q01469	Fatty acid-binding protein, epidermal OS=Homo sapiens GN=FABP5 PE=1 SV=3	2	60.3	95.2	130.6	FABP5	1.37185	0.456121
A0A024QZN6	Retinoic acid induced 17, isoform CRA_a OS=Homo sapiens GN=RAI17 PE=4 SV=1	2	44.2	57.3	78.6	ZMIZ1	1.37173	0.455994
Q53GF0	Cytidine 5'-monophosphate N-acetylneuraminic acid synthetase variant (Fragment) OS=Homo sapiens PE=2 SV=1	2	52.9	211.9	290.6	CMAS	1.3714	0.455651
Q9NX07	tRNA selenocysteine 1-associated protein 1 OS=Homo sapiens GN=TRNAU1AP PE=1 SV=1	1	57	100.2	137.4	TRNAU1AP	1.37126	0.455499
E9PQ57	mRNA export factor OS=Homo sapiens GN=RAE1 PE=1 SV=1	2	175	353.7	485		1.37122	0.455459
A0A024R0L6	Platelet-activating factor acetylhydrolase, isoform Ib, gamma subunit 29kDa, isoform CRA_a OS=Homo sapiens GN=PAFAH1B3 PE=4 SV=1	2	106	154.5	211.7	PAFAH1B3	1.37023	0.454414
Q16576	Histone-binding protein RBBP7 OS=Homo sapiens GN=RBBP7 PE=1 SV=1	2	160	241.6	330.9	RBBP7	1.36962	0.453775
P33552	Cyclin-dependent kinases regulatory subunit 2 OS=Homo sapiens GN=CKS2 PE=1 SV=1	1	37	47.1	64.5	CKS2	1.36943	0.453572
Q5EC54	Heterogeneous nuclear ribonucleoprotein K transcript variant OS=Homo sapiens GN=HNRPK PE=2 SV=1	2	807.7	1529.1	2090.9	HNRNPK	1.36741	0.451441
P48426	Phosphatidylinositol 5-phosphate 4-kinase type-2 alpha OS=Homo sapiens GN=PIP4K2A PE=1 SV=2	2	17.2	49.9	68.2	PIP4K2A	1.36673	0.450732
P21912	Succinate dehydrogenase [ubiquinone] iron-sulfur subunit, mitochondrial OS=Homo sapiens GN=SDHB PE=1 SV=3	2	33.6	75.9	103.7	SDHB	1.36627	0.450244
A0A087X1N7	Nebulin OS=Homo sapiens GN=NEB PE=1 SV=1	2	16.2	206.3	281.8		1.36597	0.449928
Q6IPI1	60S ribosomal protein L29 OS=Homo sapiens GN=RPL29 PE=2 SV=1	2	196.1	2182	2980.3	RPL29	1.36586	0.449806
E7ESA6	Focal adhesion kinase 1 OS=Homo sapiens GN=PTK2 PE=1 SV=1	2	124.3	186.7	255	PTK2	1.36583	0.449775
Q9H2U1	ATP-dependent RNA helicase DHX36 OS=Homo sapiens GN=DHX36 PE=1 SV=2	2	756.9	1656.2	2260.4	DHX36	1.36481	0.448701
B2R825	Alpha-1,4 glucan phosphorylase OS=Homo sapiens PE=2 SV=1	2	36.1	53.2	72.6	PYGL	1.36466	0.448543
Q1ED39	Lysine-rich nucleolar protein 1 OS=Homo sapiens GN=KNOP1 PE=1 SV=1	2	20.5	121.5	165.8	C16orf88; KNOP1	1.36461	0.448488
P19474	E3 ubiquitin-protein ligase TRIM21 OS=Homo sapiens GN=TRIM21 PE=1 SV=1	2	6894.8	7385.4	10074	TRIM21	1.36404	0.447889
Q9Y5A9	YTH domain-containing family protein 2 OS=Homo sapiens GN=YTHDF2 PE=1 SV=2	2	110.2	349.6	476.8	YTHDF2	1.36384	0.447679
Q8N5G2	Macoilin OS=Homo sapiens GN=TMEM57 PE=1 SV=1	1	11.3	32.5	44.3	TMEM57	1.36308	0.446867
A2RUM7	Ribosomal protein L5 OS=Homo sapiens GN=RPL5 PE=2 SV=1	2	558.8	5043.3	6873.2	RPL5	1.36284	0.446614
A0A024R1V4	60S ribosomal protein L27 OS=Homo sapiens GN=RPL27 PE=3 SV=1	2	383.9	3069.9	4182.4	RPL27	1.36239	0.446139
Q59GV6	Zinedin variant (Fragment) OS=Homo sapiens PE=2 SV=1	1	18.8	25.7	35	STRN4	1.36187	0.445587
B9EGI2	Myosin phosphatase Rho interacting protein OS=Homo sapiens GN=MPRIP PE=2 SV=1	2	211.6	354	482.1	MPRIP	1.36186	0.445583
A0A087WXK8	Chromosome 20 open reading frame 129 OS=Homo sapiens GN=FAM83D PE=1 SV=1	1	16.2	30.8	41.9	FAM83D	1.36039	0.44402
Q9NVI7	ATPase family AAA domain-containing protein 3A OS=Homo sapiens GN=ATAD3A PE=1 SV=2	1	259.1	555.4	755.1	ATAD3A	1.35956	0.443141
O15111	Inhibitor of nuclear factor kappa-B kinase subunit alpha OS=Homo sapiens GN=CHUK PE=1 SV=2	2	42	60.2	81.8	CHUK	1.3588	0.442337
P46779	60S ribosomal protein L28 OS=Homo sapiens GN=RPL28 PE=1 SV=3	2	455.5	5224.8	7095.6	RPL28	1.35806	0.441549
B2R6S5	UMP-CMP kinase OS=Homo sapiens GN=CMPK PE=2 SV=1	2	21.3	24.3	33	CMPK1	1.35802	0.44151
A0A096LNH6	Dedicator of cytokinesis protein 1 OS=Homo sapiens GN=DOCK1 PE=1 SV=1	2	12.3	58.4	79.3		1.35788	0.441352
Q7LBC6	Lysine-specific demethylase 3B OS=Homo sapiens GN=KDM3B PE=1 SV=2	1	54.2	53.7	72.9	KDM3B	1.35754	0.440997
Q86UE8	Serine/threonine-protein kinase tousled-like 2 OS=Homo sapiens GN=TLK2 PE=1 SV=2	1	26.5	29.4	39.9	TLK2	1.35714	0.440573
M0R2B7	DNA polymerase OS=Homo sapiens GN=POLD1 PE=1 SV=1	2	206.1	173.4	235.3	POLD1	1.35698	0.440397
A0A075B716	40S ribosomal protein S17 OS=Homo sapiens GN=RPS17 PE=1 SV=1	2	127.9	295	400		1.35593	0.439285
A0A024R5R0	KIAA0256 gene product, isoform CRA_a OS=Homo sapiens GN=KIAA0256 PE=4 SV=1	2	19.4	234.6	318.1	SECISBP2L	1.35592	0.439277
A0A024R7C0	Kelch-like ECH-associated protein 1, isoform CRA_a OS=Homo sapiens GN=KEAP1 PE=4 SV=1	1	40.1	74.5	101	KEAP1	1.3557	0.439043
Q12882	Dihydropyrimidine dehydrogenase [NADP(+)] OS=Homo sapiens GN=DPYD PE=1 SV=2	2	34	94.5	128.1	DPYD	1.35556	0.438884
Q5JVS0	Intracellular hyaluronan-binding protein 4 OS=Homo sapiens GN=HABP4 PE=1 SV=1	2	16.9	113.5	153.8	HABP4	1.35507	0.438363
B3KTJ9	cDNA FLJ38393 fis, clone FEBRA2007212 OS=Homo sapiens PE=2 SV=1	2	237	308.4	417.9	CCAR2; KIAA1967	1.35506	0.438355
Q9H6R4	Nucleolar protein 6 OS=Homo sapiens GN=NOL6 PE=1 SV=2	1	29.1	60	81.3	NOL6	1.355	0.438293
P62917	60S ribosomal protein L8 OS=Homo sapiens GN=RPL8 PE=1 SV=2	2	267.7	2651.8	3592.4	RPL8	1.3547	0.437976
P98160	Basement membrane-specific heparan sulfate proteoglycan core protein OS=Homo sapiens GN=HSPG2 PE=1 SV=4	2	33.2	63.3	85.7	HSPG2	1.35387	0.43709
Q9H0A0	RNA cytidine acetyltransferase OS=Homo sapiens GN=NAT10 PE=1 SV=2	2	163.5	528.2	715	NAT10	1.35365	0.436859
Q59HG1	Chromosome-associated kinesin KIF4A variant (Fragment) OS=Homo sapiens PE=2 SV=1	1	62.5	78.9	106.8	KIF4A	1.35361	0.436814
P46781	40S ribosomal protein S9 OS=Homo sapiens GN=RPS9 PE=1 SV=3	2	417.9	2046.1	2769.6	RPS9	1.3536	0.436801
B4E1T5	cDNA FLJ55764, highly similar to Apolipoprotein-L2 OS=Homo sapiens PE=2 SV=1	2	17.2	97.8	132.3	APOL2	1.35276	0.435907
O75569	Interferon-inducible double-stranded RNA-dependent protein kinase activator A OS=Homo sapiens GN=PRKRA PE=1 SV=1	2	17.8	110.8	149.8	PRKRA	1.35199	0.43508
B2RBM8	cDNA, FLJ95596, highly similar to Homo sapiens activity-dependent neuroprotector (ADNP), mRNA OS=Homo sapiens PE=2 SV=1	2	32	59.5	80.4	ADNP	1.35126	0.434306
Q96PD2	Discoidin, CUB and LCCL domain-containing protein 2 OS=Homo sapiens GN=DCBLD2 PE=1 SV=1	2	36.9	88.3	119.3	DCBLD2	1.35108	0.434109
Q9BVQ7	Spermatogenesis-associated protein 5-like protein 1 OS=Homo sapiens GN=SPATA5L1 PE=1 SV=2	1	10.8	37.1	50.1	SPATA5L1	1.3504	0.433391
Q02952	A-kinase anchor protein 12 OS=Homo sapiens GN=AKAP12 PE=1 SV=4	2	52.7	92	124.2	AKAP12	1.35	0.432959
Q9BW27	Nuclear pore complex protein Nup85 OS=Homo sapiens GN=NUP85 PE=1 SV=1	1	14.6	30	40.5	NUP85	1.35	0.432959
Q13428	Treacle protein OS=Homo sapiens GN=TCOF1 PE=1 SV=3	2	294.6	1059.3	1429.8	TCOF1	1.34976	0.432702
A4D1Z4	KIAA0415 gene product OS=Homo sapiens GN=KIAA0415 PE=4 SV=1	1	51	110.3	148.8	AP5Z1	1.34905	0.431942
Q9NXV6	CDKN2A-interacting protein OS=Homo sapiens GN=CDKN2AIP PE=1 SV=3	2	96.4	134	180.7	CDKN2AIP	1.34851	0.431364
O60282	Kinesin heavy chain isoform 5C OS=Homo sapiens GN=KIF5C PE=1 SV=1	1	16.4	82.4	111	KIF5C	1.34709	0.429843
P82932	28S ribosomal protein S6, mitochondrial OS=Homo sapiens GN=MRPS6 PE=1 SV=3	2	45.7	231.2	311.4	MRPS6	1.34689	0.429628
Q15436	Protein transport protein Sec23A OS=Homo sapiens GN=SEC23A PE=1 SV=2	2	812.3	1075.9	1448.5	SEC23A	1.34631	0.429016
A0A0A0MR39	Myelin expression factor 2 OS=Homo sapiens GN=MYEF2 PE=1 SV=1	2	46.9	192.8	259.5	MYEF2	1.34595	0.428629
P49207	60S ribosomal protein L34 OS=Homo sapiens GN=RPL34 PE=1 SV=3	2	195.4	2138.7	2876.7	RPL34	1.34507	0.427681
Q6PKG0	La-related protein 1 OS=Homo sapiens GN=LARP1 PE=1 SV=2	2	487.7	1916.1	2576.5	LARP1	1.34466	0.42724
Q9H792	Pseudopodium-enriched atypical kinase 1 OS=Homo sapiens GN=PEAK1 PE=1 SV=4	1	7.7	29.9	40.2	PEAK1	1.34448	0.42705
Q14684	Ribosomal RNA processing protein 1 homolog B OS=Homo sapiens GN=RRP1B PE=1 SV=3	2	79.9	316.9	425.9	RRP1B	1.34396	0.426487
P63261	Actin, cytoplasmic 2 OS=Homo sapiens GN=ACTG1 PE=1 SV=1	2	2133.9	3638.4	4888.4	ACTG1	1.34356	0.426058
A0A024RAV4	Cold shock domain protein A, isoform CRA_b OS=Homo sapiens GN=CSDA PE=4 SV=1	2	11.1	45.7	61.4	CSDA; YBX3	1.34354	0.426044
B2RAL3	cDNA, FLJ94988, highly similar to Homo sapiens protein phosphatase 2 (formerly 2A), regulatory subunit B'', alpha (PPP2R3A), mRNA OS=Homo sapiens PE=2 SV=1	1	9.7	23.3	31.3	PPP2R3A	1.34335	0.425833
Q9BVJ6	U3 small nucleolar RNA-associated protein 14 homolog A OS=Homo sapiens GN=UTP14A PE=1 SV=1	1	14.5	33.3	44.7	UTP14A	1.34234	0.424753
A8K3W7	cDNA FLJ76271, highly similar to Homo sapiens protein O-fucosyltransferase 2 (POFUT2), transcript variant 3, mRNA OS=Homo sapiens PE=2 SV=1	2	430	711.1	954.5	POFUT2	1.34229	0.424693
P51571	Translocon-associated protein subunit delta OS=Homo sapiens GN=SSR4 PE=1 SV=1	2	6.4	14.9	20	SSR4	1.34228	0.424688
D3DSQ0	Pericentriolar material 1, isoform CRA_a OS=Homo sapiens GN=PCM1 PE=4 SV=1	2	88.5	695.7	933.7	PCM1	1.3421	0.424494
O60341	Lysine-specific histone demethylase 1A OS=Homo sapiens GN=KDM1A PE=1 SV=2	2	42	100.9	135.3	KDM1A	1.34093	0.423236
Q59GM9	Alpha-1,4 glucan phosphorylase (Fragment) OS=Homo sapiens PE=2 SV=1	2	803	958.9	1285.7	PYGB	1.34081	0.423102
Q92925	SWI/SNF-related matrix-associated actin-dependent regulator of chromatin subfamily D member 2 OS=Homo sapiens GN=SMARCD2 PE=1 SV=3	1	12.7	22.6	30.3	SMARCD2	1.34071	0.422995
F8WB06	Ataxin-2 OS=Homo sapiens GN=ATXN2 PE=1 SV=1	2	1.3	32.9	44.1		1.34043	0.422691
Q9P0L1	Zinc finger protein with KRAB and SCAN domains 7 OS=Homo sapiens GN=ZKSCAN7 PE=1 SV=2	1	66.6	347.3	465	ZKSCAN7; ZNF167	1.3389	0.421048
Q8WV24	Pleckstrin homology-like domain family A member 1 OS=Homo sapiens GN=PHLDA1 PE=1 SV=4	2	70	209.9	280.9	PHLDA1	1.33826	0.420354
Q96Q89	Kinesin-like protein KIF20B OS=Homo sapiens GN=KIF20B PE=1 SV=3	1	69.8	89.9	120.3	KIF20B	1.33815	0.420244
Q9BPZ7	Target of rapamycin complex 2 subunit MAPKAP1 OS=Homo sapiens GN=MAPKAP1 PE=1 SV=2	2	14.5	49.2	65.8	MAPKAP1	1.3374	0.419429
J3QQJ0	SAP30-binding protein (Fragment) OS=Homo sapiens GN=SAP30BP PE=1 SV=1	2	18.8	45.4	60.7		1.337	0.419004
Q15437	Protein transport protein Sec23B OS=Homo sapiens GN=SEC23B PE=1 SV=2	2	430.5	487.3	651.5	SEC23B	1.33696	0.418955
P31483	Nucleolysin TIA-1 isoform p40 OS=Homo sapiens GN=TIA1 PE=1 SV=3	2	64.7	131.1	175.1	TIA1	1.33562	0.417511
Q9NUL5	Repressor of yield of DENV protein OS=Homo sapiens GN=RYDEN PE=1 SV=2	1	20.7	103.7	138.5	C19orf66	1.33558	0.41747
Q9H9T3	Elongator complex protein 3 OS=Homo sapiens GN=ELP3 PE=1 SV=2	2	17.7	25.7	34.3	ELP3	1.33463	0.41644
Q0VDG5	SCRN3 protein OS=Homo sapiens GN=SCRN3 PE=2 SV=1	1	15.9	65.2	87	SCRN3	1.33436	0.416143
P62273	40S ribosomal protein S29 OS=Homo sapiens GN=RPS29 PE=1 SV=2	2	41.4	175.9	234.7	RPS29	1.33428	0.416062
B3KMR5	cDNA FLJ12434 fis, clone NT2RM1000037, highly similar to Homo sapiens KIAA0690 protein OS=Homo sapiens PE=2 SV=1	2	93.6	305.2	407.2	RRP12	1.33421	0.415983
P27708	CAD protein OS=Homo sapiens GN=CAD PE=1 SV=3	2	1516.1	2688.9	3586.5	CAD	1.33382	0.415561
Q14112	Nidogen-2 OS=Homo sapiens GN=NID2 PE=1 SV=3	2	20.5	21.9	29.2	NID2	1.33333	0.415037
Q5VSQ6	Procollagen-proline, 2-oxoglutarate 4-dioxygenase (Proline 4-hydroxylase), alpha polypeptide I variant (Fragment) OS=Homo sapiens GN=P4HA1 PE=2 SV=1	2	44.9	116.4	155.2	P4HA1	1.33333	0.415037
Q7Z6E9	E3 ubiquitin-protein ligase RBBP6 OS=Homo sapiens GN=RBBP6 PE=1 SV=1	2	592.1	1238.3	1650.8	RBBP6	1.33312	0.414804
A0A087WWR3	Hydroxysteroid 11-beta-dehydrogenase 1-like protein OS=Homo sapiens GN=HSD11B1L PE=4 SV=1	1	32.7	84.4	112.5	HSD11B1L	1.33294	0.41461
A0A024R755	Calumenin, isoform CRA_a OS=Homo sapiens GN=CALU PE=4 SV=1	2	32.5	77.5	103.3	CALU	1.3329	0.414572
Q8IX12	Cell division cycle and apoptosis regulator protein 1 OS=Homo sapiens GN=CCAR1 PE=1 SV=2	2	278.5	345.4	459.6	CCAR1	1.33063	0.412111
A0A024RBS2	60S acidic ribosomal protein P0 OS=Homo sapiens GN=RPLP0 PE=3 SV=1	2	512	4979.8	6625.9	RPLP0	1.33056	0.412029
Q9Y3B7	39S ribosomal protein L11, mitochondrial OS=Homo sapiens GN=MRPL11 PE=1 SV=1	2	51.8	43.6	58	MRPL11	1.33028	0.411725
Q9BZZ5	Apoptosis inhibitor 5 OS=Homo sapiens GN=API5 PE=1 SV=3	2	112	177.8	236.5	API5	1.33015	0.411585
Q5W0B1	RING finger protein 219 OS=Homo sapiens GN=RNF219 PE=1 SV=1	1	50.8	116.1	154.4	RNF219	1.32989	0.411305
O94874	E3 UFM1-protein ligase 1 OS=Homo sapiens GN=UFL1 PE=1 SV=2	2	12	31.9	42.4	UFL1	1.32915	0.410508
Q8TF68	Zinc finger protein 384 OS=Homo sapiens GN=ZNF384 PE=1 SV=2	1	40.8	69.9	92.9	ZNF384	1.32904	0.410386
P07919	Cytochrome b-c1 complex subunit 6, mitochondrial OS=Homo sapiens GN=UQCRH PE=1 SV=2	2	34.9	49.6	65.9	UQCRH	1.32863	0.409938
P13073	Cytochrome c oxidase subunit 4 isoform 1, mitochondrial OS=Homo sapiens GN=COX4I1 PE=1 SV=1	2	48.5	106	140.8	COX4I1	1.3283	0.409583
Q9NXS2	Glutaminyl-peptide cyclotransferase-like protein OS=Homo sapiens GN=QPCTL PE=1 SV=2	1	12.9	25	33.2	QPCTL	1.328	0.409255
Q8N5N7	39S ribosomal protein L50, mitochondrial OS=Homo sapiens GN=MRPL50 PE=1 SV=2	2	15.7	36.9	49	MRPL50	1.32791	0.409161
Q5JQF8	Polyadenylate-binding protein 1-like 2 OS=Homo sapiens GN=PABPC1L2A PE=2 SV=1	1	213.4	172.3	228.7	PABPC1L2A; PABPC1L2B	1.32734	0.408534
Q8N2G6	Zinc finger CCHC domain-containing protein 24 OS=Homo sapiens GN=ZCCHC24 PE=1 SV=1	2	24.3	100.9	133.9	ZCCHC24	1.32706	0.40823
A0MNP2	CDW11/WDR57 OS=Homo sapiens GN=WDR57 PE=2 SV=1	1	45.8	83.8	111.2	SNRNP40	1.32697	0.408135
Q8IWY7	Tau-tubulin kinase OS=Homo sapiens GN=TTBK2 PE=1 SV=1	1	16.3	46.2	61.3	TTBK2	1.32684	0.407994
Q9HCN4	GPN-loop GTPase 1 OS=Homo sapiens GN=GPN1 PE=1 SV=1	2	23.9	79.3	105.2	GPN1	1.32661	0.407742
P38432	Coilin OS=Homo sapiens GN=COIL PE=1 SV=1	1	33.2	69.2	91.8	COIL	1.32659	0.407722
J3QQ67	60S ribosomal protein L18 (Fragment) OS=Homo sapiens GN=RPL18 PE=1 SV=1	2	234.6	1569.8	2081.9		1.32622	0.40732
B2R7C2	cDNA, FLJ93375, highly similar to Homo sapiens ZW10, kinetochore associated, homolog (Drosophila) (ZW10), mRNA OS=Homo sapiens PE=2 SV=1	1	65.9	177.6	235.5	ZW10	1.32601	0.407095
F5H5X6	Probable 28S rRNA (cytosine(4447)-C(5))-methyltransferase (Fragment) OS=Homo sapiens GN=NOP2 PE=1 SV=1	2	15.7	82.9	109.9		1.32569	0.406747
B1Q3L0	Tripartite motif-containing protein 5 alpha OS=Homo sapiens GN=TRIM5 PE=2 SV=1	2	42.5	47.6	63.1	TRIM5	1.32563	0.406678
Q14241	Elongin-A OS=Homo sapiens GN=ELOA PE=1 SV=2	1	146.5	500.2	662.6	TCEB3; ELOA	1.32467	0.405633
B8ZZD4	Tax1-binding protein 1 OS=Homo sapiens GN=TAX1BP1 PE=1 SV=1	2	60.1	90.6	120		1.3245	0.405451
A0A024QZN9	Voltage-dependent anion channel 2, isoform CRA_a OS=Homo sapiens GN=VDAC2 PE=4 SV=1	2	52.8	119.3	158	VDAC2	1.32439	0.405331
Q9Y3X0	Coiled-coil domain-containing protein 9 OS=Homo sapiens GN=CCDC9 PE=1 SV=1	1	17.4	61.1	80.9	CCDC9	1.32406	0.404967
B5BU28	Catenin beta-1 OS=Homo sapiens GN=CTNNB1 PE=2 SV=1	2	81.5	122.7	162.4	CTNNB1	1.32355	0.404416
E5KSX8	Mitochondrial transcription factor A OS=Homo sapiens PE=4 SV=1	2	43.9	166.4	220.2	TFAM	1.32332	0.404159
O00267	Transcription elongation factor SPT5 OS=Homo sapiens GN=SUPT5H PE=1 SV=1	2	159.1	217.5	287.7	SUPT5H	1.32276	0.40355
B3KPM8	cDNA FLJ31974 fis, clone NT2RP7008167, weakly similar to 85.1 kDa PROTEIN IN GREB-FEOA INTERGENIC REGION OS=Homo sapiens PE=2 SV=1	1	95.2	207.1	273.9	SRBD1	1.32255	0.403322
E5RIH3	PH and SEC7 domain-containing protein 3 (Fragment) OS=Homo sapiens GN=PSD3 PE=1 SV=1	2	27.1	53.4	70.6		1.3221	0.402828
A0A024R814	Ribosomal protein L7, isoform CRA_a OS=Homo sapiens GN=RPL7 PE=4 SV=1	2	522	5343.9	7064.7	RPL7	1.32201	0.402735
Q13405	39S ribosomal protein L49, mitochondrial OS=Homo sapiens GN=MRPL49 PE=1 SV=1	2	32	167	220.7	MRPL49	1.32156	0.402239
Q9BVP2	Guanine nucleotide-binding protein-like 3 OS=Homo sapiens GN=GNL3 PE=1 SV=2	2	88.1	381.2	503.6	GNL3	1.32109	0.40173
Q96J02	E3 ubiquitin-protein ligase Itchy homolog OS=Homo sapiens GN=ITCH PE=1 SV=2	1	20.2	29.6	39.1	ITCH	1.32095	0.401571
A4LAA3	Alpha thalassemia/mental retardation syndrome X-linked OS=Homo sapiens GN=ATRX PE=4 SV=1	2	24.3	86.9	114.7	ATRX	1.31991	0.400437
A0A024RAC0	Leucine zipper protein 1, isoform CRA_a OS=Homo sapiens GN=LUZP1 PE=4 SV=1	2	190.7	358.4	472.5	LUZP1	1.31836	0.398744
Q9Y333	U6 snRNA-associated Sm-like protein LSm2 OS=Homo sapiens GN=LSM2 PE=1 SV=1	2	81	127.1	167.5	LSM2	1.31786	0.398197
Q659C4	La-related protein 1B OS=Homo sapiens GN=LARP1B PE=1 SV=2	1	41.4	55.4	73	LARP1B	1.31769	0.39801
Q02878	60S ribosomal protein L6 OS=Homo sapiens GN=RPL6 PE=1 SV=3	2	610.9	6963.5	9175	RPL6	1.31758	0.397896
Q8IYB8	ATP-dependent RNA helicase SUPV3L1, mitochondrial OS=Homo sapiens GN=SUPV3L1 PE=1 SV=1	1	14.1	24.9	32.8	SUPV3L1	1.31727	0.39755
Q99973	Telomerase protein component 1 OS=Homo sapiens GN=TEP1 PE=1 SV=2	2	1237.2	1509.2	1987.8	TEP1	1.31712	0.397389
Q92734	Protein TFG OS=Homo sapiens GN=TFG PE=1 SV=2	2	4840.6	6738.8	8874.5	TFG	1.31693	0.397174
P62081	40S ribosomal protein S7 OS=Homo sapiens GN=RPS7 PE=1 SV=1	2	113.4	363.3	478.4	RPS7	1.31682	0.397056
P07199	Major centromere autoantigen B OS=Homo sapiens GN=CENPB PE=1 SV=2	1	10.5	43.3	57	CENPB	1.3164	0.396595
Q5VYS8	Terminal uridylyltransferase 7 OS=Homo sapiens GN=ZCCHC6 PE=1 SV=1	1	68.7	185.6	244.3	ZCCHC6	1.31627	0.396457
Q6NZI2	Caveolae-associated protein 1 OS=Homo sapiens GN=CAVIN1 PE=1 SV=1	2	186.7	1175.2	1546.8	PTRF; CAVIN1	1.3162	0.39638
A0A024R2Q4	Ribosomal protein L15 OS=Homo sapiens GN=RPL15 PE=3 SV=1	2	203.6	2680.3	3527.7	RPL15	1.31616	0.396333
Q9HCK8	Chromodomain-helicase-DNA-binding protein 8 OS=Homo sapiens GN=CHD8 PE=1 SV=5	1	8.8	15.5	20.4	CHD8	1.31613	0.396301
Q9Y2X9	Zinc finger protein 281 OS=Homo sapiens GN=ZNF281 PE=1 SV=1	1	32.6	87	114.5	ZNF281	1.31609	0.39626
A0A1U9X972	PRRC2A OS=Homo sapiens PE=4 SV=1	2	157.6	621.3	817.6	PRRC2A	1.31595	0.396105
Q59FR8	Galectin (Fragment) OS=Homo sapiens PE=2 SV=1	2	60.8	146.6	192.9	LGALS3	1.31583	0.395968
Q8TE49	OTU domain-containing protein 7A OS=Homo sapiens GN=OTUD7A PE=1 SV=1	1	7	11.4	15	OTUD7A	1.31579	0.395929
Q86TI2	Dipeptidyl peptidase 9 OS=Homo sapiens GN=DPP9 PE=1 SV=3	2	139.2	118.2	155.5	DPP9	1.31557	0.395685
Q68D38	Uncharacterized protein DKFZp686O15119 (Fragment) OS=Homo sapiens GN=DKFZp686O15119 PE=2 SV=1	2	14.5	33.3	43.8	GLS	1.31532	0.395409
A0A140VK53	Testicular secretory protein Li 53 OS=Homo sapiens PE=2 SV=1	2	749.7	1528.3	2010.1	SRRM2	1.31525	0.39534
A0A024R0M6	Translocase of inner mitochondrial membrane 50 homolog (Yeast), isoform CRA_b OS=Homo sapiens GN=TIMM50 PE=4 SV=1	2	33.3	192.4	252.8	TIMM50	1.31393	0.393888
Q8NI08	Nuclear receptor coactivator 7 OS=Homo sapiens GN=NCOA7 PE=1 SV=2	1	43.3	48.1	63.2	NCOA7	1.31393	0.393888
Q01081	Splicing factor U2AF 35 kDa subunit OS=Homo sapiens GN=U2AF1 PE=1 SV=3	2	465	560.7	736.6	U2AF1; LOC102724594; U2AF1L5	1.31371	0.393652
Q6IPH7	RPL14 protein OS=Homo sapiens GN=RPL14 PE=1 SV=1	2	423.9	4083.5	5362.7	RPL14	1.31326	0.393153
H0Y3Z3	Protein disulfide-isomerase (Fragment) OS=Homo sapiens GN=P4HB PE=1 SV=1	2	291.2	353.1	463.6		1.31294	0.392804
A0A087WUF6	Fibroblast growth factor OS=Homo sapiens GN=FGF2 PE=1 SV=2	2	15.2	45.7	60	FGF2	1.31291	0.392768
A8K6H6	Tyrosine-protein phosphatase non-receptor type OS=Homo sapiens PE=2 SV=1	1	57.6	98.8	129.7	PTPN14	1.31275	0.392596
Q15393	Splicing factor 3B subunit 3 OS=Homo sapiens GN=SF3B3 PE=1 SV=4	2	718.8	1129.8	1483	SF3B3	1.31262	0.392451
Q9P0J6	39S ribosomal protein L36, mitochondrial OS=Homo sapiens GN=MRPL36 PE=1 SV=1	1	42.5	130.6	171.4	MRPL36	1.3124	0.392212
O14647	Chromodomain-helicase-DNA-binding protein 2 OS=Homo sapiens GN=CHD2 PE=1 SV=2	1	112.7	324.2	425.3	CHD2	1.31184	0.391597
E7EN19	Mitogen-activated protein kinase kinase kinase kinase 4 OS=Homo sapiens GN=MAP4K4 PE=1 SV=1	2	149.9	713.3	935.6		1.31165	0.391383
M0R2Z9	SURP and G-patch domain-containing protein 2 OS=Homo sapiens GN=SUGP2 PE=1 SV=1	1	29.1	41.2	54	SUGP2	1.31068	0.390315
P53992	Protein transport protein Sec24C OS=Homo sapiens GN=SEC24C PE=1 SV=3	2	1232.3	1690.3	2215.4	SEC24C	1.31065	0.390288
A0A024RB03	KIAA0528, isoform CRA_b OS=Homo sapiens GN=KIAA0528 PE=4 SV=1	1	11.3	33.5	43.9	C2CD5; KIAA0528	1.31045	0.39006
Q59GY2	Ribosomal protein L4 variant (Fragment) OS=Homo sapiens PE=2 SV=1	2	935.5	10607.8	13899.8	RPL4	1.31034	0.389939
Q9NTJ4	Alpha-mannosidase 2C1 OS=Homo sapiens GN=MAN2C1 PE=1 SV=1	1	181.6	178.9	234.4	MAN2C1	1.31023	0.389819
Q86WJ1	Chromodomain-helicase-DNA-binding protein 1-like OS=Homo sapiens GN=CHD1L PE=1 SV=2	1	39.4	44.5	58.3	CHD1L	1.31011	0.389691
O95425	Supervillin OS=Homo sapiens GN=SVIL PE=1 SV=2	1	106.6	190.3	249.3	SVIL	1.31004	0.389607
Q9C0C2	182 kDa tankyrase-1-binding protein OS=Homo sapiens GN=TNKS1BP1 PE=1 SV=4	2	3168.3	704.1	921.6	TNKS1BP1	1.3089	0.38836
B2R7G6	cDNA, FLJ93437, highly similar to Homo sapiens histidyl-tRNA synthetase-like (HARSL), mRNA OS=Homo sapiens PE=2 SV=1	1	34.9	63.5	83.1	HARS2	1.30866	0.388092
Q9H5Z1	Probable ATP-dependent RNA helicase DHX35 OS=Homo sapiens GN=DHX35 PE=1 SV=2	1	31.2	36.3	47.5	DHX35	1.30854	0.387958
Q14558	Phosphoribosyl pyrophosphate synthase-associated protein 1 OS=Homo sapiens GN=PRPSAP1 PE=1 SV=2	2	10.7	52.2	68.3	PRPSAP1	1.30843	0.387836
Q13045	Protein flightless-1 homolog OS=Homo sapiens GN=FLII PE=1 SV=2	2	545.1	2546.9	3332.1	FLII	1.3083	0.387689
B4DSP0	HCG1642748, isoform CRA_b OS=Homo sapiens GN=PEG10 PE=1 SV=1	1	18.8	100.9	132	PEG10	1.30823	0.387612
P30260	Cell division cycle protein 27 homolog OS=Homo sapiens GN=CDC27 PE=1 SV=2	2	6.4	15.6	20.4	CDC27	1.30769	0.387023
D3DU92	RNA binding protein S1 OS=Homo sapiens GN=RNPS1 PE=1 SV=1	2	96.2	244.5	319.7	RNPS1	1.30757	0.386884
A0A0S2Z3L2	ATPase Ca++ transporting cardiac muscle slow twitch 2 isoform 1 (Fragment) OS=Homo sapiens GN=ATP2A2 PE=2 SV=1	2	428.9	679.7	888.6	ATP2A2	1.30734	0.386636
Q8N3D4	EH domain-binding protein 1-like protein 1 OS=Homo sapiens GN=EHBP1L1 PE=1 SV=2	2	229.7	347.6	453.8	EHBP1L1	1.30552	0.384629
Q00325	Phosphate carrier protein, mitochondrial OS=Homo sapiens GN=SLC25A3 PE=1 SV=2	2	290.3	789.1	1029.9	SLC25A3	1.30516	0.384224
Q8IY63	Angiomotin-like protein 1 OS=Homo sapiens GN=AMOTL1 PE=1 SV=1	1	12.5	23.3	30.4	AMOTL1	1.30472	0.383741
B4DTK7	cDNA FLJ61387, highly similar to Homo sapiens conserved nuclear protein NHN1 (NHN1), mRNA OS=Homo sapiens PE=2 SV=1	2	113.6	1876.7	2448.5	ZC3H18	1.30468	0.3837
Q53FE8	cDNA FLJ36526 fis, clone TRACH2003347, highly similar to NSFL1 cofactor p47 (Fragment) OS=Homo sapiens PE=2 SV=1	2	119.2	112.3	146.5	NSFL1C	1.30454	0.383543
E5KLJ5	Dynamin-like 120 kDa protein, mitochondrial OS=Homo sapiens GN=OPA1 PE=1 SV=1	2	23	70.6	92.1	OPA1	1.30453	0.383533
Q15334	Lethal(2) giant larvae protein homolog 1 OS=Homo sapiens GN=LLGL1 PE=1 SV=3	2	79.8	365.5	476.8	LLGL1	1.30451	0.383513
Q9HD33	39S ribosomal protein L47, mitochondrial OS=Homo sapiens GN=MRPL47 PE=1 SV=2	1	18.4	40.1	52.3	MRPL47	1.30424	0.383209
O94822	E3 ubiquitin-protein ligase listerin OS=Homo sapiens GN=LTN1 PE=1 SV=6	1	9.2	25	32.6	LTN1	1.304	0.382944
Q9UK45	U6 snRNA-associated Sm-like protein LSm7 OS=Homo sapiens GN=LSM7 PE=1 SV=1	1	9.9	50	65.2	LSM7	1.304	0.382944
O95363	Phenylalanine--tRNA ligase, mitochondrial OS=Homo sapiens GN=FARS2 PE=1 SV=1	2	16.3	62.9	82	FARS2	1.30366	0.382564
Q9P227	Rho GTPase-activating protein 23 OS=Homo sapiens GN=ARHGAP23 PE=1 SV=2	2	19.4	43.2	56.3	ARHGAP23	1.30324	0.382104
Q9H9Y6	DNA-directed RNA polymerase I subunit RPA2 OS=Homo sapiens GN=POLR1B PE=1 SV=2	2	9.2	16.5	21.5	POLR1B	1.30303	0.381871
Q7Z3U7	Protein MON2 homolog OS=Homo sapiens GN=MON2 PE=1 SV=3	2	48.3	94.1	122.6	MON2	1.30287	0.381692
P62854	40S ribosomal protein S26 OS=Homo sapiens GN=RPS26 PE=1 SV=3	2	106.3	582.9	759.4	RPS26; LOC101929876; RPS26P25	1.3028	0.381612
G5EA03	LIM and calponin homology domains-containing protein 1 OS=Homo sapiens GN=LIMCH1 PE=1 SV=1	2	19	26.1	34	LIMCH1	1.30268	0.381485
P53602	Diphosphomevalonate decarboxylase OS=Homo sapiens GN=MVD PE=1 SV=1	1	13.1	14.9	19.4	MVD	1.30201	0.380744
P15880	40S ribosomal protein S2 OS=Homo sapiens GN=RPS2 PE=1 SV=2	2	439.1	2321	3021	RPS2	1.30159	0.38028
Q96KP4	Cytosolic non-specific dipeptidase OS=Homo sapiens GN=CNDP2 PE=1 SV=2	2	48.7	37.8	49.2	CNDP2	1.30159	0.380272
E9PGC8	Microtubule-associated protein 1A OS=Homo sapiens GN=MAP1A PE=1 SV=1	2	128.6	290.3	377.7	MAP1A	1.30107	0.379696
B3KXN9	cDNA FLJ45793 fis, clone NT2RI2009233 OS=Homo sapiens PE=2 SV=1	2	6.8	24.6	32	ADO	1.30081	0.379414
Q8N474	Secreted frizzled-related protein 1 OS=Homo sapiens GN=SFRP1 PE=1 SV=1	2	145.1	1412.8	1837.2	SFRP1	1.3004	0.378951
A0A1Y0BRN3	Myosin VI transcript variant 007 OS=Homo sapiens GN=Myo6-007 PE=2 SV=1	2	124.1	217.8	283.2		1.30028	0.378817
Q15058	Kinesin-like protein KIF14 OS=Homo sapiens GN=KIF14 PE=1 SV=1	1	45.8	97.7	127	KIF14	1.2999	0.378398
Q14258	E3 ubiquitin/ISG15 ligase TRIM25 OS=Homo sapiens GN=TRIM25 PE=1 SV=2	2	520.3	996.1	1294.7	TRIM25	1.29977	0.378255
A0A024R7E0	BTB (POZ) domain containing 14B, isoform CRA_a OS=Homo sapiens GN=BTBD14B PE=4 SV=1	1	59.9	76.1	98.9	NACC1	1.29961	0.378074
Q6QNY5	UDP-N-acetylglucosamine-2-epimerase / N-acetylmannosamine kinase OS=Homo sapiens GN=GNE PE=2 SV=1	1	30.8	41.1	53.4	GNE	1.29927	0.377701
Q8WUQ7	Cactin OS=Homo sapiens GN=CACTIN PE=1 SV=3	1	48.5	71.1	92.3	CACTIN	1.29817	0.376481
Q8IVF2	Protein AHNAK2 OS=Homo sapiens GN=AHNAK2 PE=1 SV=2	2	213.9	331	429.6	AHNAK2	1.29789	0.376163
A0A0S2Z4Z6	Serine/arginine repetitive matrix 1 isoform 2 (Fragment) OS=Homo sapiens GN=SRRM1 PE=2 SV=1	2	523	1207.6	1567.1	SRRM1	1.2977	0.375955
P38646	Stress-70 protein, mitochondrial OS=Homo sapiens GN=HSPA9 PE=1 SV=2	2	596.5	1231.8	1597.9	HSPA9	1.29721	0.375409
P52788	Spermine synthase OS=Homo sapiens GN=SMS PE=1 SV=2	2	164.6	274.6	356.2	SMS	1.29716	0.375356
P26368	Splicing factor U2AF 65 kDa subunit OS=Homo sapiens GN=U2AF2 PE=1 SV=4	2	1186.1	1974.9	2559.2	U2AF2	1.29586	0.373913
P55735	Protein SEC13 homolog OS=Homo sapiens GN=SEC13 PE=1 SV=3	2	300.9	528.7	685	SEC13	1.29563	0.373655
Q9UKA4	A-kinase anchor protein 11 OS=Homo sapiens GN=AKAP11 PE=1 SV=1	2	47.6	175.4	227.2	AKAP11	1.29532	0.373314
O43150	Arf-GAP with SH3 domain, ANK repeat and PH domain-containing protein 2 OS=Homo sapiens GN=ASAP2 PE=1 SV=3	2	105.3	241.6	312.7	ASAP2	1.29429	0.372159
Q92896	Golgi apparatus protein 1 OS=Homo sapiens GN=GLG1 PE=1 SV=2	2	148.4	261.8	338.7	GLG1	1.29374	0.371543
Q53GA4	Pleckstrin homology-like domain family A member 2 OS=Homo sapiens GN=PHLDA2 PE=1 SV=2	1	61.4	102.6	132.7	PHLDA2	1.29337	0.371138
P30876	DNA-directed RNA polymerase II subunit RPB2 OS=Homo sapiens GN=POLR2B PE=1 SV=1	2	306.5	1127.4	1458.1	POLR2B	1.29333	0.37109
A0A024RAM4	Microtubule-associated protein 1B, isoform CRA_b OS=Homo sapiens GN=MAP1B PE=4 SV=1	2	1415.7	3402.3	4400	MAP1B	1.29324	0.370993
Q13610	Periodic tryptophan protein 1 homolog OS=Homo sapiens GN=PWP1 PE=1 SV=1	1	61.8	259.6	335.7	PWP1	1.29314	0.370882
B2RBD5	Tubulin beta chain OS=Homo sapiens PE=2 SV=1	2	137.9	392.7	507.5	TUBB3	1.29234	0.36998
Q7Z7G8	Vacuolar protein sorting-associated protein 13B OS=Homo sapiens GN=VPS13B PE=1 SV=2	1	51.4	115.4	149.1	VPS13B	1.29203	0.369637
H7C2I1	Protein arginine N-methyltransferase 1 OS=Homo sapiens GN=PRMT1 PE=1 SV=1	2	1133.8	1477.2	1907.3	PRMT1	1.29116	0.368667
Q86U75	Dihydropyrimidinase-like 2 OS=Homo sapiens PE=2 SV=1	2	7.2	44.5	57.4		1.28989	0.367245
P41223	Protein BUD31 homolog OS=Homo sapiens GN=BUD31 PE=1 SV=2	1	14.7	24.5	31.6	BUD31	1.2898	0.367143
B2RCM2	cDNA, FLJ96156, highly similar to Homo sapiens leucyl-tRNA synthetase (LARS), mRNA OS=Homo sapiens PE=2 SV=1	2	274.1	480	619	LARS	1.28958	0.366905
A0A024R7U6	DNA helicase OS=Homo sapiens GN=MCM4 PE=3 SV=1	2	102.1	130.1	167.7	MCM4	1.28901	0.366262
P68032	Actin, alpha cardiac muscle 1 OS=Homo sapiens GN=ACTC1 PE=1 SV=1	2	143.9	264.4	340.8	ACTC1	1.28896	0.366203
Q15369	Elongin-C OS=Homo sapiens GN=ELOC PE=1 SV=1	2	277.7	566.2	729.8	TCEB1; ELOC	1.28894	0.366189
Q96TA2	ATP-dependent zinc metalloprotease YME1L1 OS=Homo sapiens GN=YME1L1 PE=1 SV=2	1	7.8	41.6	53.6	YME1L1	1.28846	0.365649
Q6IBU4	SDF2 protein OS=Homo sapiens GN=SDF2 PE=2 SV=1	1	19.1	87.1	112.2	SDF2	1.28817	0.365328
Q53S08	Rab6C OS=Homo sapiens GN=RAB6C PE=2 SV=1	1	32	37.5	48.3	WTH3DI	1.288	0.365133
A0A024R4U3	Tubulin tyrosine ligase-like family, member 12, isoform CRA_a OS=Homo sapiens GN=TTLL12 PE=4 SV=1	2	7.6	15.3	19.7	TTLL12	1.28758	0.364664
O43795	Unconventional myosin-Ib OS=Homo sapiens GN=MYO1B PE=1 SV=3	2	25.2	61.9	79.7	MYO1B	1.28756	0.36464
Q13649	Threonine, tyrosine phosphatase (Fragment) OS=Homo sapiens PE=2 SV=1	2	110.6	148.5	191.2	DUSP4	1.28754	0.36462
Q01968	Inositol polyphosphate 5-phosphatase OCRL-1 OS=Homo sapiens GN=OCRL PE=1 SV=3	1	59.9	58.8	75.7	OCRL	1.28741	0.364477
Q9NS15	Latent-transforming growth factor beta-binding protein 3 OS=Homo sapiens GN=LTBP3 PE=1 SV=4	2	39.8	112.4	144.7	LTBP3	1.28737	0.364423
Q9BWH6	RNA polymerase II-associated protein 1 OS=Homo sapiens GN=RPAP1 PE=1 SV=3	2	13.5	58.3	75	RPAP1	1.28645	0.363395
Q58FF8	Putative heat shock protein HSP 90-beta 2 OS=Homo sapiens GN=HSP90AB2P PE=1 SV=2	1	7.2	125.5	161.4	HSP90AB2P	1.28606	0.362953
A8K6I4	cDNA FLJ76877, highly similar to Homo sapiens superkiller viralicidic activity 2-like 2 (SKIV2L2), mRNA OS=Homo sapiens PE=2 SV=1	2	171.9	289.3	372	SKIV2L2	1.28586	0.362736
Q00653	Nuclear factor NF-kappa-B p100 subunit OS=Homo sapiens GN=NFKB2 PE=1 SV=4	2	114.7	287.1	368.9	NFKB2	1.28492	0.361676
A8K905	cDNA FLJ77615, highly similar to Homo sapiens nucleolar complex associated 3 homolog (S. cerevisiae) (NOC3L), mRNA OS=Homo sapiens PE=2 SV=1	1	22	55.9	71.8	NOC3L	1.28444	0.361136
Q8WVK2	U4/U6.U5 small nuclear ribonucleoprotein 27 kDa protein OS=Homo sapiens GN=SNRNP27 PE=1 SV=1	2	47.7	55.2	70.9	SNRNP27	1.28442	0.361117
Q96IV0	Peptide-N(4)-(N-acetyl-beta-glucosaminyl)asparagine amidase OS=Homo sapiens GN=NGLY1 PE=1 SV=1	1	26.3	113.8	146.1	NGLY1	1.28383	0.360456
B2R805	cDNA, FLJ93684, highly similar to Homo sapiens mab-21-like 1 (C. elegans) (MAB21L1), mRNA OS=Homo sapiens PE=2 SV=1	2	29.9	77.4	99.3	MAB21L1	1.28295	0.35946
P46087	Probable 28S rRNA (cytosine(4447)-C(5))-methyltransferase OS=Homo sapiens GN=NOP2 PE=1 SV=2	2	120.8	296.6	380.3	NOP2	1.2822	0.358619
Q9Y383	Putative RNA-binding protein Luc7-like 2 OS=Homo sapiens GN=LUC7L2 PE=1 SV=2	2	1614	2283.3	2927.6	LUC7L2	1.28218	0.358598
A0A024R419	KIAA0971, isoform CRA_b OS=Homo sapiens GN=KIAA0971 PE=4 SV=1	1	30.1	52.1	66.8	FASTKD2	1.28215	0.358565
A0A024R6W0	Aspartate aminotransferase OS=Homo sapiens GN=GOT2 PE=4 SV=1	2	36.7	67.8	86.9	GOT2	1.28171	0.358071
B3KM97	cDNA FLJ10554 fis, clone NT2RP2002385, highly similar to Synaptic glycoprotein SC2 OS=Homo sapiens PE=2 SV=1	2	209	370.3	474.5	TECR	1.28139	0.357714
P05023	Sodium/potassium-transporting ATPase subunit alpha-1 OS=Homo sapiens GN=ATP1A1 PE=1 SV=1	2	314.9	448.8	574.8	ATP1A1	1.28075	0.356987
A8K6V0	cDNA FLJ78676, highly similar to Homo sapiens SEC24 related gene family, member D (SEC24D), mRNA OS=Homo sapiens PE=2 SV=1	2	922.4	1021.9	1308.4	SEC24D	1.28036	0.35655
Q8TEQ6	Gem-associated protein 5 OS=Homo sapiens GN=GEMIN5 PE=1 SV=3	2	126.8	248.3	317.9	GEMIN5	1.28031	0.356489
O94964	Protein SOGA1 OS=Homo sapiens GN=SOGA1 PE=1 SV=2	2	109.1	470.5	602.2	SOGA1	1.27991	0.356048
O00139	Kinesin-like protein KIF2A OS=Homo sapiens GN=KIF2A PE=1 SV=3	2	105.7	496.6	635.4	KIF2A	1.2795	0.355581
A0A024R203	Proteasome (Prosome, macropain) activator subunit 3 (PA28 gamma Ki), isoform CRA_a OS=Homo sapiens GN=PSME3 PE=4 SV=1	1	148.5	137.5	175.9	PSME3	1.27927	0.355324
B2RAM2	cDNA, FLJ94999, highly similar to Homo sapiens calpain 7 (CAPN7), mRNA OS=Homo sapiens PE=2 SV=1	2	21.8	36.9	47.2	CAPN7	1.27913	0.355166
P61081	NEDD8-conjugating enzyme Ubc12 OS=Homo sapiens GN=UBE2M PE=1 SV=1	2	68.1	161.6	206.7	UBE2M	1.27908	0.355111
A0A024R3D4	Uncharacterized protein OS=Homo sapiens GN=DKFZp547C195 PE=4 SV=1	1	41.6	66.7	85.3	RNF214	1.27886	0.354859
Q06124	Tyrosine-protein phosphatase non-receptor type 11 OS=Homo sapiens GN=PTPN11 PE=1 SV=2	2	20.3	18.3	23.4	PTPN11	1.27869	0.354665
Q96AY4	Tetratricopeptide repeat protein 28 OS=Homo sapiens GN=TTC28 PE=1 SV=4	1	58.6	211.9	270.9	TTC28	1.27843	0.354377
P49792	E3 SUMO-protein ligase RanBP2 OS=Homo sapiens GN=RANBP2 PE=1 SV=2	1	194.7	387.9	495.9	RANBP2	1.27842	0.354364
Q6ZUT6	Uncharacterized protein C15orf52 OS=Homo sapiens GN=C15orf52 PE=1 SV=1	2	137.7	354.3	452.6	C15orf52	1.27745	0.353265
J3KQY1	39S ribosomal protein L22, mitochondrial OS=Homo sapiens GN=MRPL22 PE=1 SV=1	2	12.9	44.8	57.2		1.27679	0.352516
P30536	Translocator protein OS=Homo sapiens GN=TSPO PE=1 SV=3	2	50.8	45.2	57.7	TSPO	1.27655	0.352249
G3V180	Dipeptidyl peptidase 3 OS=Homo sapiens GN=DPP3 PE=1 SV=1	2	52.2	58.6	74.8	DPP3	1.27645	0.352138
J3KTA4	Probable ATP-dependent RNA helicase DDX5 OS=Homo sapiens GN=DDX5 PE=1 SV=1	2	464.5	1277.3	1630.3	DDX5	1.27636	0.35204
A8K7N0	cDNA FLJ75556, highly similar to Homo sapiens ribosomal protein L14, mRNA OS=Homo sapiens PE=2 SV=1	2	57.6	555.8	709.4	RPL14	1.27636	0.352033
Q9Y4E6	WD repeat-containing protein 7 OS=Homo sapiens GN=WDR7 PE=1 SV=2	1	40.4	48.6	62	WDR7	1.27572	0.351312
Q6ZSZ5	Rho guanine nucleotide exchange factor 18 OS=Homo sapiens GN=ARHGEF18 PE=1 SV=3	1	17.7	88.6	113	ARHGEF18	1.2754	0.350944
A0A024R2F8	Coiled-coil-helix-coiled-coil-helix domain containing 4, isoform CRA_b OS=Homo sapiens GN=CHCHD4 PE=4 SV=1	2	2.6	21.8	27.8	CHCHD4	1.27523	0.350757
Q8TCC3	39S ribosomal protein L30, mitochondrial OS=Homo sapiens GN=MRPL30 PE=1 SV=1	2	74.4	269.6	343.7	MRPL30	1.27485	0.350329
A5PLM5	Exosome component 9 OS=Homo sapiens GN=EXOSC9 PE=2 SV=1	2	74.1	202.3	257.9	EXOSC9	1.27484	0.350315
Q92945	Far upstream element-binding protein 2 OS=Homo sapiens GN=KHSRP PE=1 SV=4	1	482.9	864.2	1101.6	KHSRP	1.2747	0.350163
F6IR49	MHC class I antigen (Fragment) OS=Homo sapiens GN=HLA-A PE=3 SV=1	2	16.8	19.3	24.6	HLA-A	1.27461	0.350057
Q9UGN5	Poly [ADP-ribose] polymerase 2 OS=Homo sapiens GN=PARP2 PE=1 SV=2	1	298.9	296	377.1	PARP2	1.27399	0.34935
O95470	Sphingosine-1-phosphate lyase 1 OS=Homo sapiens GN=SGPL1 PE=1 SV=3	2	32.2	107.7	137.2	SGPL1	1.27391	0.349262
Q53HQ0	Flotillin 1 variant (Fragment) OS=Homo sapiens PE=2 SV=1	2	125.7	257.8	328.4	FLOT1	1.27386	0.349202
Q9NWB6	Arginine and glutamate-rich protein 1 OS=Homo sapiens GN=ARGLU1 PE=1 SV=1	2	1361.8	1439.5	1833.7	ARGLU1	1.27385	0.34919
P23284	Peptidyl-prolyl cis-trans isomerase B OS=Homo sapiens GN=PPIB PE=1 SV=2	2	453.5	849	1081.2	PPIB	1.2735	0.348797
B7WPE2	Echinoderm microtubule associated protein like 3, isoform CRA_e OS=Homo sapiens GN=EML3 PE=1 SV=1	1	48.8	167.5	213.3	EML3	1.27343	0.348723
Q8TA92	Similar to AFG3 ATPase family gene 3-like 2 (Yeast) (Fragment) OS=Homo sapiens PE=2 SV=1	2	36.5	121.8	155.1	AFG3L2	1.2734	0.348685
O75592	E3 ubiquitin-protein ligase MYCBP2 OS=Homo sapiens GN=MYCBP2 PE=1 SV=3	2	172.3	417.6	531.7	MYCBP2	1.27323	0.348491
O14802	DNA-directed RNA polymerase III subunit RPC1 OS=Homo sapiens GN=POLR3A PE=1 SV=2	2	63.7	198.4	252.6	POLR3A	1.27319	0.348443
Q5U5J2	CSNK2A1 protein OS=Homo sapiens GN=CSNK2A1 PE=1 SV=1	2	113.4	1726.3	2197.2	CSNK2A1	1.27278	0.347983
P62875	DNA-directed RNA polymerases I, II, and III subunit RPABC5 OS=Homo sapiens GN=POLR2L PE=1 SV=1	1	107.5	424.6	540.1	POLR2L	1.27202	0.347122
Q12996	Cleavage stimulation factor subunit 3 OS=Homo sapiens GN=CSTF3 PE=1 SV=1	2	106.3	104.6	133	CSTF3	1.27151	0.346543
O75165	DnaJ homolog subfamily C member 13 OS=Homo sapiens GN=DNAJC13 PE=1 SV=5	2	46.5	90.4	114.9	DNAJC13	1.27102	0.345984
A8K666	cDNA FLJ75460, highly similar to Homo sapiens phenylalanine-tRNA synthetase-like, beta subunit, mRNA OS=Homo sapiens PE=2 SV=1	2	423.8	693.5	881.2	FARSB	1.27066	0.345574
F8W6H6	Unconventional myosin-Va OS=Homo sapiens GN=MYO5A PE=1 SV=2	2	146	299.4	380.4		1.27054	0.345443
P35268	60S ribosomal protein L22 OS=Homo sapiens GN=RPL22 PE=1 SV=2	2	87.9	328.4	417.2	RPL22	1.2704	0.345285
Q9Y2W1	Thyroid hormone receptor-associated protein 3 OS=Homo sapiens GN=THRAP3 PE=1 SV=2	2	365.5	1098.3	1394.5	THRAP3	1.26969	0.344476
V9HW31	ATP synthase subunit beta OS=Homo sapiens GN=HEL-S-271 PE=1 SV=1	2	449	622	789.6	ATP5B	1.26945	0.344207
B2R4C1	cDNA, FLJ92036, highly similar to Homo sapiens ribosomal protein L31 (RPL31), mRNA OS=Homo sapiens PE=2 SV=1	2	148.6	706.4	896.7	RPL31	1.26939	0.34414
P55084	Trifunctional enzyme subunit beta, mitochondrial OS=Homo sapiens GN=HADHB PE=1 SV=3	2	132.4	263	333.6	HADHB	1.26844	0.343056
Q8NFD5	AT-rich interactive domain-containing protein 1B OS=Homo sapiens GN=ARID1B PE=1 SV=2	1	113.9	131.9	167.3	ARID1B	1.26839	0.342993
P16035	Metalloproteinase inhibitor 2 OS=Homo sapiens GN=TIMP2 PE=1 SV=2	2	187.7	1351.7	1714.3	TIMP2	1.26825	0.342845
Q9UGR2	Zinc finger CCCH domain-containing protein 7B OS=Homo sapiens GN=ZC3H7B PE=1 SV=1	2	83.5	243.3	308.5	ZC3H7B	1.26798	0.342534
Q9BTE3	Mini-chromosome maintenance complex-binding protein OS=Homo sapiens GN=MCMBP PE=1 SV=2	2	134.5	324.9	411.9	MCMBP	1.26777	0.342298
Q9Y5Q9	General transcription factor 3C polypeptide 3 OS=Homo sapiens GN=GTF3C3 PE=1 SV=1	1	22.1	136.4	172.9	GTF3C3	1.2676	0.342094
Q9HDC9	Adipocyte plasma membrane-associated protein OS=Homo sapiens GN=APMAP PE=1 SV=2	2	60.1	59.8	75.8	APMAP	1.26756	0.342052
B2RE46	cDNA, FLJ96923, highly similar to Homo sapiens ribophorin II (RPN2), mRNA OS=Homo sapiens PE=2 SV=1	2	75.3	61.9	78.4	RPN2	1.26656	0.340914
A8K602	Mitogen-activated protein kinase kinase kinase kinase OS=Homo sapiens PE=2 SV=1	1	52.4	78.8	99.8	MAP4K3	1.2665	0.340844
Q969V3	Nicalin OS=Homo sapiens GN=NCLN PE=1 SV=2	2	28.4	56.3	71.3	NCLN	1.26643	0.340767
Q12965	Unconventional myosin-Ie OS=Homo sapiens GN=MYO1E PE=1 SV=2	2	11.4	15.4	19.5	MYO1E	1.26623	0.340544
P67775	Serine/threonine-protein phosphatase 2A catalytic subunit alpha isoform OS=Homo sapiens GN=PPP2CA PE=1 SV=1	2	24.5	48.5	61.4	PPP2CA	1.26598	0.340254
Q9NXH8	Torsin-4A OS=Homo sapiens GN=TOR4A PE=1 SV=2	2	57	639.2	808.9	TOR4A	1.26549	0.339694
A0A0S2Z3F2	V-raf murine sarcoma 3611 viral oncogene-like protein isoform 2 (Fragment) OS=Homo sapiens GN=ARAF PE=2 SV=1	2	69.1	195.2	247	ARAF	1.26537	0.339558
A8K4Z6	cDNA FLJ76180 OS=Homo sapiens PE=2 SV=1	1	65	109.8	138.9	BUD13	1.26503	0.339169
E9PLM6	Midkine OS=Homo sapiens GN=MDK PE=1 SV=1	2	25.1	43.4	54.9		1.26498	0.339111
P35251	Replication factor C subunit 1 OS=Homo sapiens GN=RFC1 PE=1 SV=4	2	86	195.2	246.9	RFC1	1.26486	0.338974
Q9UNF0	Protein kinase C and casein kinase substrate in neurons protein 2 OS=Homo sapiens GN=PACSIN2 PE=1 SV=2	2	49.9	66.6	84.2	PACSIN2	1.26426	0.338298
B7ZKT9	KIAA1033 protein OS=Homo sapiens GN=KIAA1033 PE=2 SV=1	2	89.6	177.1	223.9	KIAA1033; WASHC4	1.26426	0.33829
H3BSH7	U3 small nucleolar RNA-associated protein 4 homolog (Fragment) OS=Homo sapiens GN=UTP4 PE=1 SV=1	2	13.7	42.1	53.2		1.26366	0.337606
Q8TCS8	Polyribonucleotide nucleotidyltransferase 1, mitochondrial OS=Homo sapiens GN=PNPT1 PE=1 SV=2	2	226.4	365.2	461.1	PNPT1	1.2626	0.336393
Q14566	DNA replication licensing factor MCM6 OS=Homo sapiens GN=MCM6 PE=1 SV=1	2	173.4	188.4	237.8	MCM6	1.26221	0.33595
A0A024R6N2	CDC42 binding protein kinase beta (DMPK-like), isoform CRA_a OS=Homo sapiens GN=CDC42BPB PE=3 SV=1	2	179.3	458.5	578.7	CDC42BPB	1.26216	0.335894
P26196	Probable ATP-dependent RNA helicase DDX6 OS=Homo sapiens GN=DDX6 PE=1 SV=2	2	361.4	779.5	983.7	DDX6	1.26196	0.335669
Q8N684	Cleavage and polyadenylation specificity factor subunit 7 OS=Homo sapiens GN=CPSF7 PE=1 SV=1	2	272.5	416.8	525.9	CPSF7	1.26176	0.335433
D3DUZ3	Interferon, gamma-inducible protein 16, isoform CRA_a OS=Homo sapiens GN=IFI16 PE=4 SV=1	2	531.9	1998.3	2521	IFI16	1.26157	0.335223
Q6FHX6	Flap endonuclease 1 OS=Homo sapiens GN=FEN1 PE=2 SV=1	2	32.3	56.2	70.9	FEN1	1.26157	0.335215
Q8IWR0	Zinc finger CCCH domain-containing protein 7A OS=Homo sapiens GN=ZC3H7A PE=1 SV=1	1	48.2	93.4	117.8	ZC3H7A	1.26124	0.334845
A0A0S2Z4J1	Hydroxysteroid (17-beta) dehydrogenase 4, isoform CRA_b (Fragment) OS=Homo sapiens GN=HSD17B4 PE=2 SV=1	2	113.7	196.2	247.4	HSD17B4	1.26096	0.33452
H0Y368	Dolichol-phosphate mannosyltransferase subunit 1 (Fragment) OS=Homo sapiens GN=DPM1 PE=1 SV=1	2	84.1	212.9	268.4		1.26069	0.334209
Q4G0J3	La-related protein 7 OS=Homo sapiens GN=LARP7 PE=1 SV=1	2	201.5	655.5	826.3	LARP7	1.26056	0.33407
H7C4S2	HMG box-containing protein 1 (Fragment) OS=Homo sapiens GN=HBP1 PE=1 SV=1	2	182.7	120.9	152.3		1.25972	0.333102
Q9UBV8	Peflin OS=Homo sapiens GN=PEF1 PE=1 SV=1	2	103.3	170.3	214.5	PEF1	1.25954	0.332899
A0A024R329	GDP-mannose pyrophosphorylase B, isoform CRA_a OS=Homo sapiens GN=GMPPB PE=4 SV=1	2	21	21.2	26.7	GMPPB	1.25943	0.332775
B4DI41	cDNA FLJ55972, highly similar to Methyl-CpG-binding domain protein 1 OS=Homo sapiens PE=2 SV=1	2	34.6	64	80.6	MBD1	1.25937	0.332708
Q14764	Major vault protein OS=Homo sapiens GN=MVP PE=1 SV=4	2	10847.2	15919.4	20048.4	MVP	1.25937	0.332701
B2RB90	cDNA, FLJ95375, highly similar to Homo sapiens glutamine-fructose-6-phosphate transaminase 2 (GFPT2), mRNA OS=Homo sapiens PE=2 SV=1	1	13.5	24.7	31.1	GFPT2	1.25911	0.332404
Q96PU4	E3 ubiquitin-protein ligase UHRF2 OS=Homo sapiens GN=UHRF2 PE=1 SV=1	2	78.1	145.3	182.9	UHRF2	1.25877	0.33202
P17480	Nucleolar transcription factor 1 OS=Homo sapiens GN=UBTF PE=1 SV=1	2	276	1586.8	1997.3	UBTF	1.2587	0.331931
P07437	Tubulin beta chain OS=Homo sapiens GN=TUBB PE=1 SV=2	2	2462	10131.7	12744	TUBB	1.25783	0.330942
Q14197	Peptidyl-tRNA hydrolase ICT1, mitochondrial OS=Homo sapiens GN=MRPL58 PE=1 SV=1	2	6.4	26.4	33.2	ICT1; MRPL58	1.25758	0.330645
O95487	Protein transport protein Sec24B OS=Homo sapiens GN=SEC24B PE=1 SV=2	2	402.3	584.4	734.4	SEC24B	1.25667	0.32961
P14324	Farnesyl pyrophosphate synthase OS=Homo sapiens GN=FDPS PE=1 SV=4	2	127.2	131.9	165.7	FDPS	1.25625	0.329129
Q8TDR0	TRAF3-interacting protein 1 OS=Homo sapiens GN=TRAF3IP1 PE=1 SV=1	2	33.7	481.7	605	TRAF3IP1	1.25597	0.3288
B4E0L0	cDNA FLJ54030, highly similar to Polymerase delta-interacting protein 3 OS=Homo sapiens PE=2 SV=1	2	39.9	46.1	57.9	POLDIP3	1.25597	0.328797
Q13283	Ras GTPase-activating protein-binding protein 1 OS=Homo sapiens GN=G3BP1 PE=1 SV=1	2	187.6	664.5	834.4	G3BP1	1.25568	0.32847
Q8WXA9	Splicing regulatory glutamine/lysine-rich protein 1 OS=Homo sapiens GN=SREK1 PE=1 SV=1	2	413.2	631	792.2	SREK1	1.25547	0.328225
Q9Y2J2	Band 4.1-like protein 3 OS=Homo sapiens GN=EPB41L3 PE=1 SV=2	2	27.4	41.9	52.6	EPB41L3	1.25537	0.328113
A0A024R8B6	Nucleoporin 214kDa, isoform CRA_b OS=Homo sapiens GN=NUP214 PE=4 SV=1	2	72.1	132	165.7	NUP214	1.2553	0.328036
O75940	Survival of motor neuron-related-splicing factor 30 OS=Homo sapiens GN=SMNDC1 PE=1 SV=1	1	37.5	146.2	183.5	SMNDC1	1.25513	0.327837
B3KY51	cDNA FLJ46863 fis, clone UTERU3011558 OS=Homo sapiens PE=2 SV=1	1	17.2	121.6	152.6	NOA1	1.25493	0.327612
A6NHB5	Zinc finger MYM-type protein 3 OS=Homo sapiens GN=ZMYM3 PE=1 SV=1	2	29.4	75	94.1		1.25467	0.327304
O75607	Nucleoplasmin-3 OS=Homo sapiens GN=NPM3 PE=1 SV=3	1	10.2	66	82.8	NPM3	1.25455	0.327165
O95758	Polypyrimidine tract-binding protein 3 OS=Homo sapiens GN=PTBP3 PE=1 SV=2	2	30.3	63.3	79.4	PTBP3	1.25434	0.326934
P56537	Eukaryotic translation initiation factor 6 OS=Homo sapiens GN=EIF6 PE=1 SV=1	2	154.7	233.2	292.5	EIF6	1.25429	0.326869
Q9H857	5'-nucleotidase domain-containing protein 2 OS=Homo sapiens GN=NT5DC2 PE=1 SV=1	2	37.5	142.6	178.8	NT5DC2	1.25386	0.326373
B2RDP6	cDNA, FLJ96709, highly similar to Homo sapiens glutamate rich WD repeat protein GRWD (GRWD), mRNA OS=Homo sapiens PE=2 SV=1	2	35.9	207.5	260.1	GRWD1	1.25349	0.325955
Q9H3P7	Golgi resident protein GCP60 OS=Homo sapiens GN=ACBD3 PE=1 SV=4	2	34.5	64.7	81.1	ACBD3	1.25348	0.325936
Q8WWN8	Arf-GAP with Rho-GAP domain, ANK repeat and PH domain-containing protein 3 OS=Homo sapiens GN=ARAP3 PE=1 SV=1	2	40	146.5	183.5	ARAP3	1.25256	0.324879
E7EVA0	Microtubule-associated protein OS=Homo sapiens GN=MAP4 PE=1 SV=1	2	1920.3	5035.3	6306.7	MAP4	1.2525	0.324808
A0A087WXF8	Nucleolar protein of 40 kDa OS=Homo sapiens GN=ZCCHC17 PE=1 SV=1	2	708.8	827.8	1036.6	ZCCHC17	1.25223	0.324505
P31930	Cytochrome b-c1 complex subunit 1, mitochondrial OS=Homo sapiens GN=UQCRC1 PE=1 SV=3	2	17.5	36.5	45.7	UQCRC1	1.25205	0.324298
P52701	DNA mismatch repair protein Msh6 OS=Homo sapiens GN=MSH6 PE=1 SV=2	2	78.7	121.7	152.3	MSH6	1.25144	0.323587
Q15650	Activating signal cointegrator 1 OS=Homo sapiens GN=TRIP4 PE=1 SV=4	2	59	264.6	331.1	TRIP4	1.25132	0.323454
A1KY36	Cell proliferation-inducing protein 41 OS=Homo sapiens PE=2 SV=1	2	84.5	180.9	226.2	COL8A1	1.25041	0.322407
A0A024QZY4	Tripartite motif-containing 38, isoform CRA_a OS=Homo sapiens GN=TRIM38 PE=4 SV=1	2	6.9	51.3	64.1	TRIM38	1.24951	0.321366
H0Y2S1	Putative GTP-binding protein 6 OS=Homo sapiens GN=GTPBP6 PE=1 SV=2	1	60.3	238.5	298	GTPBP6	1.24948	0.321323
B2R4A5	cDNA, FLJ92019, highly similar to Homo sapiens mitochondrial ribosomal protein S14 (MRPS14), nuclear gene encoding mitochondrial protein, mRNA OS=Homo sapiens PE=2 SV=1	2	10.2	42.1	52.6	MRPS14	1.24941	0.321243
Q07954	Prolow-density lipoprotein receptor-related protein 1 OS=Homo sapiens GN=LRP1 PE=1 SV=2	2	499.9	1340.9	1675.3	LRP1	1.24938	0.321218
Q9NZB2	Constitutive coactivator of PPAR-gamma-like protein 1 OS=Homo sapiens GN=FAM120A PE=1 SV=2	2	677.4	2019	2521.7	FAM120A	1.24898	0.320756
J3KPP4	Cisplatin resistance-associated overexpressed protein, isoform CRA_b OS=Homo sapiens GN=LUC7L3 PE=1 SV=1	2	340.5	548.7	685.1	LUC7L3	1.24859	0.320297
P51572	B-cell receptor-associated protein 31 OS=Homo sapiens GN=BCAP31 PE=1 SV=3	2	42.9	120.7	150.7	BCAP31	1.24855	0.320254
Q53FE5	Uncharacterized protein (Fragment) OS=Homo sapiens PE=2 SV=1	2	190.7	620	774.1	NECAP2	1.24855	0.320252
Q8WW35	Tctex1 domain-containing protein 2 OS=Homo sapiens GN=TCTEX1D2 PE=1 SV=2	2	133.6	746.9	931.6	TCTEX1D2	1.24729	0.318796
O95486	Protein transport protein Sec24A OS=Homo sapiens GN=SEC24A PE=1 SV=2	2	70.8	77.3	96.4	SEC24A	1.24709	0.318565
Q5T160	Probable arginine--tRNA ligase, mitochondrial OS=Homo sapiens GN=RARS2 PE=1 SV=1	1	11.5	33.6	41.9	RARS2	1.24702	0.318489
P50570	Dynamin-2 OS=Homo sapiens GN=DNM2 PE=1 SV=2	2	132.7	226.1	281.9	DNM2	1.24679	0.318222
A0A024QZT9	NAD(P)H dehydrogenase, quinone 2, isoform CRA_a OS=Homo sapiens GN=NQO2 PE=4 SV=1	2	111.4	219.7	273.9	NQO2	1.2467	0.318114
Q5TDG3	WD repeat domain 3, isoform CRA_b OS=Homo sapiens GN=WDR3 PE=2 SV=1	1	50	82.4	102.7	WDR3	1.24636	0.31772
Q15020	Squamous cell carcinoma antigen recognized by T-cells 3 OS=Homo sapiens GN=SART3 PE=1 SV=1	2	105.9	296.1	369	SART3	1.2462	0.317536
P27824	Calnexin OS=Homo sapiens GN=CANX PE=1 SV=2	2	275	439.8	547.9	CANX	1.24579	0.317065
A8KAP3	cDNA FLJ78483, highly similar to Homo sapiens elongation factor Tu GTP binding domain containing 2 (EFTUD2), mRNA OS=Homo sapiens PE=2 SV=1	2	213.1	360.8	449.4	EFTUD2	1.24557	0.316801
A6P4V4	Tyrosine-protein kinase receptor OS=Homo sapiens PE=2 SV=1	2	28	61.5	76.6		1.24553	0.316758
Q9NYI0	PH and SEC7 domain-containing protein 3 OS=Homo sapiens GN=PSD3 PE=1 SV=2	1	128.1	236.7	294.8	PSD3	1.24546	0.316677
B2RB52	cDNA, FLJ95314, highly similar to Homo sapiens transducin (beta)-like 2 (TBL2), transcript variant 1, mRNA OS=Homo sapiens PE=2 SV=1	2	72.1	130.4	162.4	TBL2	1.2454	0.316608
P46109	Crk-like protein OS=Homo sapiens GN=CRKL PE=1 SV=1	2	56.7	59.1	73.6	CRKL	1.24535	0.316548
Q9NVE5	Ubiquitin carboxyl-terminal hydrolase 40 OS=Homo sapiens GN=USP40 PE=1 SV=3	2	14.4	41.2	51.3	USP40	1.24515	0.316314
P22695	Cytochrome b-c1 complex subunit 2, mitochondrial OS=Homo sapiens GN=UQCRC2 PE=1 SV=3	2	80.4	158.3	197.1	UQCRC2	1.2451	0.316267
P61513	60S ribosomal protein L37a OS=Homo sapiens GN=RPL37A PE=1 SV=2	2	203.1	572.2	712.3	RPL37A	1.24484	0.315965
B4DKM0	cDNA FLJ51883, highly similar to Mitochondrial 39S ribosomal protein L3 OS=Homo sapiens PE=2 SV=1	2	77.1	305.7	380.4	MRPL3	1.24436	0.315401
Q9NYF8	Bcl-2-associated transcription factor 1 OS=Homo sapiens GN=BCLAF1 PE=1 SV=2	2	124.7	633.9	788.7	BCLAF1	1.2442	0.315221
Q15084	Protein disulfide-isomerase A6 OS=Homo sapiens GN=PDIA6 PE=1 SV=1	2	555	682.1	848.6	PDIA6	1.2441	0.315101
E9PCR7	2-oxoglutarate dehydrogenase, mitochondrial OS=Homo sapiens GN=OGDH PE=1 SV=1	2	45.3	68.1	84.7	OGDH	1.24376	0.314707
Q96GA3	Protein LTV1 homolog OS=Homo sapiens GN=LTV1 PE=1 SV=1	2	54.6	199.1	247.6	LTV1	1.2436	0.314518
A0A0D9SFG6	Cytohesin-2 OS=Homo sapiens GN=CYTH2 PE=1 SV=1	2	29.2	84.2	104.7		1.24347	0.314369
B5ME97	Septin 10, isoform CRA_c OS=Homo sapiens GN=SEPT10 PE=1 SV=2	2	67.1	113.6	141.2	SEPT10	1.24296	0.313777
Q9NRN5	Olfactomedin-like protein 3 OS=Homo sapiens GN=OLFML3 PE=2 SV=1	2	131.5	123.5	153.5	OLFML3	1.24291	0.313728
P15121	Aldose reductase OS=Homo sapiens GN=AKR1B1 PE=1 SV=3	2	26.7	53.6	66.6	AKR1B1	1.24254	0.313289
Q9UK58	Cyclin-L1 OS=Homo sapiens GN=CCNL1 PE=1 SV=1	1	37.6	74.8	92.9	CCNL1	1.24198	0.31264
A0A0K0K1H8	Epididymis secretory sperm binding protein Li 71p OS=Homo sapiens GN=HEL-S-71p PE=2 SV=1	2	1044.2	988.4	1227.3	TF	1.2417	0.312321
Q9UK13	Zinc finger protein 221 OS=Homo sapiens GN=ZNF221 PE=2 SV=3	1	87.9	501.4	622.5	ZNF221	1.24152	0.312112
P05556	Integrin beta-1 OS=Homo sapiens GN=ITGB1 PE=1 SV=2	2	359.8	468.4	581.4	ITGB1	1.24125	0.31179
Q969T9	WW domain-binding protein 2 OS=Homo sapiens GN=WBP2 PE=1 SV=1	2	103.2	148.3	184	WBP2	1.24073	0.311187
B4DJ30	cDNA FLJ61290, highly similar to Neutral alpha-glucosidase AB OS=Homo sapiens PE=2 SV=1	2	683.8	1144.5	1420		1.24072	0.311173
J3QR07	YTH domain-containing protein 1 OS=Homo sapiens GN=YTHDC1 PE=1 SV=1	1	39.4	152.5	189.2	YTHDC1	1.24066	0.311103
D3DTH7	Myosin IC, isoform CRA_a OS=Homo sapiens GN=MYO1C PE=3 SV=1	2	13.9	18.7	23.2	MYO1C	1.24064	0.311087
Q7Z3R8	DNA-directed RNA polymerase subunit beta OS=Homo sapiens GN=DKFZp686D10173 PE=2 SV=1	1	24.1	42.4	52.6	POLR3B	1.24057	0.310999
Q15434	RNA-binding motif, single-stranded-interacting protein 2 OS=Homo sapiens GN=RBMS2 PE=1 SV=1	2	150.1	444.5	551.4	RBMS2	1.24049	0.310916
A8K8Y8	cDNA FLJ77796, highly similar to Homo sapiens evolutionarily conserved G-patch domain containing protein mRNA OS=Homo sapiens PE=2 SV=1	1	69.6	73.3	90.9	GPATCH1	1.24011	0.310467
Q71U36	Tubulin alpha-1A chain OS=Homo sapiens GN=TUBA1A PE=1 SV=1	2	168.5	569.7	706.1	TUBA1A	1.23942	0.30967
Q9HAU5	Regulator of nonsense transcripts 2 OS=Homo sapiens GN=UPF2 PE=1 SV=1	1	20.4	72.7	90.1	UPF2	1.23934	0.309572
P61964	WD repeat-containing protein 5 OS=Homo sapiens GN=WDR5 PE=1 SV=1	1	21.8	46.8	58	WDR5	1.23932	0.309544
M0R0P8	Unconventional myosin-IXb OS=Homo sapiens GN=MYO9B PE=1 SV=1	2	62.8	110.7	137.1		1.23848	0.308573
E9PFW3	AP-2 complex subunit mu OS=Homo sapiens GN=AP2M1 PE=1 SV=1	2	174.1	598.4	741.1	AP2M1	1.23847	0.308558
Q6NTG0	SLC9A3R2 protein (Fragment) OS=Homo sapiens GN=SLC9A3R2 PE=2 SV=1	2	114.3	296.2	366.7	SLC9A3R2	1.23801	0.308029
P36542	ATP synthase subunit gamma, mitochondrial OS=Homo sapiens GN=ATP5C1 PE=1 SV=1	2	160.2	428.3	530.2	ATP5C1	1.23792	0.307915
B4DEA8	cDNA FLJ56425, highly similar to Very-long-chain specific acyl-CoAdehydrogenase, mitochondrial (EC 1.3.99.-) OS=Homo sapiens PE=2 SV=1	2	119.3	332.5	411.6		1.23789	0.307889
Q6NUL7	SPTLC1 protein OS=Homo sapiens GN=SPTLC1 PE=2 SV=1	2	38.9	104.7	129.6	SPTLC1	1.23782	0.307804
A0A024R4C5	ADP-ribosylation factor-like 4C, isoform CRA_a OS=Homo sapiens GN=ARL4C PE=3 SV=1	1	11.2	38.3	47.4	ARL4C	1.2376	0.307543
Q96SB3	Neurabin-2 OS=Homo sapiens GN=PPP1R9B PE=1 SV=2	2	20.9	169.2	209.4	PPP1R9B	1.23759	0.307532
Q9HAU4	E3 ubiquitin-protein ligase SMURF2 OS=Homo sapiens GN=SMURF2 PE=1 SV=1	1	58.9	161.7	200.1	SMURF2	1.23748	0.307401
Q9BQ70	Transcription factor 25 OS=Homo sapiens GN=TCF25 PE=1 SV=1	2	95.4	327.6	404.9	TCF25	1.23596	0.30563
Q53GQ2	COP9 constitutive photomorphogenic homolog subunit 7B variant (Fragment) OS=Homo sapiens PE=2 SV=1	1	34.8	61.1	75.5	COPS7B	1.23568	0.305304
B2RDZ9	cDNA, FLJ96850 OS=Homo sapiens PE=2 SV=1	1	23.3	18.3	22.6	EXOSC7	1.23497	0.304479
Q9Y237	Peptidyl-prolyl cis-trans isomerase NIMA-interacting 4 OS=Homo sapiens GN=PIN4 PE=1 SV=1	2	27.7	24.7	30.5	PIN4	1.23482	0.304298
P14625	Endoplasmin OS=Homo sapiens GN=HSP90B1 PE=1 SV=1	2	1839.7	2163.6	2670.9	HSP90B1	1.23447	0.303892
E9PR30	40S ribosomal protein S30 OS=Homo sapiens GN=FAU PE=1 SV=1	2	225.3	574.7	709.4		1.23438	0.30379
O75340	Programmed cell death protein 6 OS=Homo sapiens GN=PDCD6 PE=1 SV=1	2	111.6	182.4	225.1	PDCD6	1.2341	0.30346
B4DI54	cDNA FLJ56386, highly similar to Heat shock 70 kDa protein 1L OS=Homo sapiens PE=2 SV=1	1	19.6	53.4	65.9	HSPA1L	1.23408	0.303439
Q59EC0	Adenosine deaminase, RNA-specific isoform ADAR-a variant (Fragment) OS=Homo sapiens PE=2 SV=1	2	246.3	840	1036.5	ADAR	1.23393	0.303259
X6R8A1	Carboxypeptidase OS=Homo sapiens GN=CTSA PE=1 SV=1	2	55	143.8	177.4	CTSA	1.23366	0.302942
Q8TCT9	Minor histocompatibility antigen H13 OS=Homo sapiens GN=HM13 PE=1 SV=1	2	18.9	25.7	31.7	HM13	1.23346	0.302714
A0A140VK66	Testicular secretory protein Li 66 OS=Homo sapiens PE=2 SV=1	2	2373.4	85483.3	105424	WDR60	1.23327	0.302485
P62701	40S ribosomal protein S4, X isoform OS=Homo sapiens GN=RPS4X PE=1 SV=2	2	688.8	3070	3786	RPS4X	1.23322	0.302436
A0A024R6N1	TNF receptor-associated factor 3, isoform CRA_a OS=Homo sapiens GN=TRAF3 PE=4 SV=1	1	22.7	41.6	51.3	TRAF3	1.23317	0.302375
A8K5Q1	cDNA FLJ77548, highly similar to Homo sapiens bin3, bicoid-interacting 3, homolog (Drosophila) (BCDIN3), mRNA OS=Homo sapiens PE=2 SV=1	2	212.1	590.8	728.5	MEPCE	1.23307	0.302259
A0A024R582	D4, zinc and double PHD fingers family 2, isoform CRA_a OS=Homo sapiens GN=DPF2 PE=4 SV=1	1	9.7	26.2	32.3	DPF2	1.23282	0.301967
Q96CS3	FAS-associated factor 2 OS=Homo sapiens GN=FAF2 PE=1 SV=2	2	26.2	59.3	73.1	FAF2	1.23272	0.301839
Q12769	Nuclear pore complex protein Nup160 OS=Homo sapiens GN=NUP160 PE=1 SV=3	1	47.2	99.7	122.9	NUP160	1.2327	0.30182
A0A0J9YVP6	Poly(U)-binding-splicing factor PUF60 (Fragment) OS=Homo sapiens GN=PUF60 PE=1 SV=1	2	1094.1	1323.7	1631.5		1.23253	0.301623
A0A0D9SF53	ATP-dependent RNA helicase DDX3X OS=Homo sapiens GN=DDX3X PE=1 SV=1	2	1396.2	2743	3380.6		1.23245	0.301525
Q9Y3U8	60S ribosomal protein L36 OS=Homo sapiens GN=RPL36 PE=1 SV=3	2	178.6	953.8	1174.8	RPL36	1.2317	0.300656
Q7L5D6	Golgi to ER traffic protein 4 homolog OS=Homo sapiens GN=GET4 PE=1 SV=1	2	35.5	197.7	243.4	GET4	1.23116	0.300016
J3KNR0	Non-specific serine/threonine protein kinase OS=Homo sapiens GN=MARK3 PE=1 SV=2	2	146.3	416.2	512.4	MARK3	1.23114	0.299994
O15294	UDP-N-acetylglucosamine--peptide N-acetylglucosaminyltransferase 110 kDa subunit OS=Homo sapiens GN=OGT PE=1 SV=3	2	92.6	212.6	261.7	OGT	1.23095	0.299772
O94906	Pre-mRNA-processing factor 6 OS=Homo sapiens GN=PRPF6 PE=1 SV=1	2	30.3	84.9	104.5	PRPF6	1.23086	0.299666
F8W6C2	SPATS2-like protein (Fragment) OS=Homo sapiens GN=SPATS2L PE=1 SV=8	2	6.9	46.8	57.6		1.23077	0.29956
B2R9K6	cDNA, FLJ94436, highly similar to Homo sapiens platelet derived growth factor C (PDGFC), mRNA OS=Homo sapiens PE=2 SV=1	1	59.4	111.1	136.7	PDGFC	1.23042	0.299154
Q01804	OTU domain-containing protein 4 OS=Homo sapiens GN=OTUD4 PE=1 SV=4	1	61.5	237.9	292.7	OTUD4	1.23035	0.299067
A0A087X295	WD repeat-containing protein 6 OS=Homo sapiens GN=WDR6 PE=1 SV=1	2	96.7	300.6	369.8	WDR6	1.23021	0.2989
Q6PGP7	Tetratricopeptide repeat protein 37 OS=Homo sapiens GN=TTC37 PE=1 SV=1	2	87.6	139.2	171.2	TTC37	1.22989	0.298523
A0A0F7KYT8	Fragile X mental retardation autosomal homolog variant p2K OS=Homo sapiens GN=FXR1 PE=2 SV=1	2	235.1	1202.1	1478.4	FXR1	1.22985	0.29848
P82663	28S ribosomal protein S25, mitochondrial OS=Homo sapiens GN=MRPS25 PE=1 SV=1	1	31.7	213.3	262.2	MRPS25	1.22925	0.297784
Q13643	Four and a half LIM domains protein 3 OS=Homo sapiens GN=FHL3 PE=1 SV=4	2	341.1	546.2	671.4	FHL3	1.22922	0.297743
H0Y8P4	U3 small nucleolar RNA-associated protein 15 homolog (Fragment) OS=Homo sapiens GN=UTP15 PE=1 SV=1	2	63.2	113.9	140		1.22915	0.297659
P41214	Eukaryotic translation initiation factor 2D OS=Homo sapiens GN=EIF2D PE=1 SV=3	2	160	570.9	701.6	EIF2D	1.22894	0.297411
O95831	Apoptosis-inducing factor 1, mitochondrial OS=Homo sapiens GN=AIFM1 PE=1 SV=1	2	129.1	651.5	800.6	AIFM1	1.22886	0.297316
A8K401	Prohibitin, isoform CRA_a OS=Homo sapiens GN=PHB PE=2 SV=1	2	55.6	133.1	163.5	PHB	1.2284	0.29678
O95071	E3 ubiquitin-protein ligase UBR5 OS=Homo sapiens GN=UBR5 PE=1 SV=2	1	62.7	133.2	163.5	UBR5	1.22748	0.295697
Q9UPZ3	Hermansky-Pudlak syndrome 5 protein OS=Homo sapiens GN=HPS5 PE=1 SV=2	1	8.3	27.3	33.5	HPS5	1.22711	0.29526
Q9NZC9	SWI/SNF-related matrix-associated actin-dependent regulator of chromatin subfamily A-like protein 1 OS=Homo sapiens GN=SMARCAL1 PE=1 SV=1	1	23.3	148	181.6	SMARCAL1	1.22703	0.295167
A8K521	DNA helicase OS=Homo sapiens PE=2 SV=1	2	196.7	325.1	398.9	MCM5	1.22701	0.295144
A0A096LPC5	WASH complex subunit 2C OS=Homo sapiens GN=WASHC2C PE=1 SV=1	2	39.2	74.9	91.9	FAM21C; WASHC2C	1.22697	0.295099
Q9BZK7	F-box-like/WD repeat-containing protein TBL1XR1 OS=Homo sapiens GN=TBL1XR1 PE=1 SV=1	2	95.9	153.5	188.3	TBL1XR1	1.22671	0.294794
Q9P2N5	RNA-binding protein 27 OS=Homo sapiens GN=RBM27 PE=1 SV=2	2	17.7	63.6	78	RBM27	1.22642	0.294447
B4DSR7	cDNA FLJ58470, highly similar to SS18-like protein 1 OS=Homo sapiens PE=2 SV=1	1	11.2	37.1	45.5	SS18L1	1.22642	0.294447
Q9HBB9	HC56 OS=Homo sapiens PE=4 SV=1	2	43.1	132.1	162	GEMIN4	1.22634	0.294363
Q09028	Histone-binding protein RBBP4 OS=Homo sapiens GN=RBBP4 PE=1 SV=3	2	60.8	97.7	119.8	RBBP4	1.2262	0.294197
Q13427	Peptidyl-prolyl cis-trans isomerase G OS=Homo sapiens GN=PPIG PE=1 SV=2	2	56.7	79.2	97.1	PPIG	1.22601	0.293971
Q6U8A4	Ubiquitin-specific protease 7 isoform (Fragment) OS=Homo sapiens PE=2 SV=1	2	363.9	742.9	910.8	USP7	1.22601	0.293966
P30049	ATP synthase subunit delta, mitochondrial OS=Homo sapiens GN=ATP5D PE=1 SV=2	2	30.1	52.4	64.2	ATP5D	1.22519	0.293006
V9HW87	Abhydrolase domain containing 14B, isoform CRA_a OS=Homo sapiens GN=HEL-S-299 PE=2 SV=1	1	42.9	67.5	82.7	ABHD14B	1.22519	0.293
Q08397	Lysyl oxidase homolog 1 OS=Homo sapiens GN=LOXL1 PE=1 SV=2	2	140.6	377.8	462.7	LOXL1	1.22472	0.292454
A6NHL2	Tubulin alpha chain-like 3 OS=Homo sapiens GN=TUBAL3 PE=1 SV=2	1	17.8	49	60	TUBAL3	1.22449	0.292181
A5PLM9	Cathepsin L1 OS=Homo sapiens GN=CTSL1 PE=2 SV=1	2	23	71.3	87.3	CTSL; CTSL1	1.2244	0.29208
P53621	Coatomer subunit alpha OS=Homo sapiens GN=COPA PE=1 SV=2	2	987.4	1766.6	2162.5	COPA	1.2241	0.291725
O00299	Chloride intracellular channel protein 1 OS=Homo sapiens GN=CLIC1 PE=1 SV=4	2	153.9	193	236.1	CLIC1	1.22332	0.290797
Q9BRP8	Partner of Y14 and mago OS=Homo sapiens GN=PYM1 PE=1 SV=1	2	107.8	351.7	430.2	WIBG; PYM1	1.2232	0.290662
Q99715	Collagen alpha-1(XII) chain OS=Homo sapiens GN=COL12A1 PE=1 SV=2	2	169.7	340.3	416.2	COL12A1	1.22304	0.29047
Q7L4I2	Arginine/serine-rich coiled-coil protein 2 OS=Homo sapiens GN=RSRC2 PE=1 SV=1	2	147.6	179.9	220	RSRC2	1.2229	0.290308
Q9UBB6	Neurochondrin OS=Homo sapiens GN=NCDN PE=1 SV=1	2	3.4	70.1	85.7	NCDN	1.22254	0.289881
J3KQN4	60S ribosomal protein L36a OS=Homo sapiens GN=RPL36A PE=1 SV=1	2	454.7	2411.1	2947.4	RPL36A	1.22243	0.289751
O60711	Leupaxin OS=Homo sapiens GN=LPXN PE=1 SV=1	2	146.2	190.2	232.5	LPXN	1.2224	0.289713
X6R4W8	BUB3-interacting and GLEBS motif-containing protein ZNF207 OS=Homo sapiens GN=ZNF207 PE=1 SV=1	2	37.9	79.3	96.9		1.22194	0.289176
Q9H444	Charged multivesicular body protein 4b OS=Homo sapiens GN=CHMP4B PE=1 SV=1	2	37.2	53.2	65	CHMP4B	1.2218	0.289013
A0A024R8A7	HCG31253, isoform CRA_a OS=Homo sapiens GN=hCG_31253 PE=4 SV=1	2	89.7	239	292	FUBP3	1.22176	0.288958
Q8NCA5	Protein FAM98A OS=Homo sapiens GN=FAM98A PE=1 SV=1	2	291.3	560.9	685	FAM98A	1.22125	0.28836
R9QDW3	Signal transducer and activator of transcription OS=Homo sapiens GN=STAT2 PE=3 SV=1	2	14.2	33.9	41.4	STAT2	1.22124	0.288345
A0A0A0MT49	Transcription activator BRG1 OS=Homo sapiens GN=SMARCA4 PE=1 SV=1	2	311.8	482.7	589.4		1.22105	0.28812
Q15056	Eukaryotic translation initiation factor 4H OS=Homo sapiens GN=EIF4H PE=1 SV=5	2	318.3	370	451.6	EIF4H	1.22054	0.28752
B2R995	Malic enzyme OS=Homo sapiens PE=2 SV=1	1	15.1	31.3	38.2	ME3	1.22045	0.28741
P35613	Basigin OS=Homo sapiens GN=BSG PE=1 SV=2	2	32.4	57.8	70.5	BSG	1.21972	0.286554
A0A024R8P8	Ribosomal protein L38, isoform CRA_a OS=Homo sapiens GN=RPL38 PE=3 SV=1	2	995.8	2271.3	2770	RPL38	1.21957	0.286368
P46063	ATP-dependent DNA helicase Q1 OS=Homo sapiens GN=RECQL PE=1 SV=3	2	940.7	1081.6	1318.7	RECQL	1.21921	0.285949
G1UI16	SCC-112 protein, isoform CRA_b OS=Homo sapiens GN=PDS5A PE=2 SV=1	2	39.8	75.3	91.8	PDS5A	1.21912	0.285844
Q66PJ3	ADP-ribosylation factor-like protein 6-interacting protein 4 OS=Homo sapiens GN=ARL6IP4 PE=1 SV=2	2	111.4	184	224.3	ARL6IP4	1.21902	0.285724
B3KRW4	cDNA FLJ34980 fis, clone OCBBF2000522, highly similar to Rab GTPase-binding effector protein 2 OS=Homo sapiens PE=2 SV=1	2	10.4	34.7	42.3	RABEP2	1.21902	0.285722
O94905	Erlin-2 OS=Homo sapiens GN=ERLIN2 PE=1 SV=1	2	20.2	52.4	63.8	ERLIN2	1.21756	0.28399
P50479	PDZ and LIM domain protein 4 OS=Homo sapiens GN=PDLIM4 PE=1 SV=2	2	49.6	123.3	150.1	PDLIM4	1.21736	0.283751
A4D0V4	Capping protein (Actin filament) muscle Z-line, alpha 2 OS=Homo sapiens GN=CAPZA2 PE=2 SV=1	2	22.3	34.6	42.1	CAPZA2	1.21676	0.283048
B2RMV2	CYTSA protein OS=Homo sapiens GN=CYTSA PE=2 SV=1	2	24.5	55.4	67.4	SPECC1L	1.21661	0.282863
Q05048	Cleavage stimulation factor subunit 1 OS=Homo sapiens GN=CSTF1 PE=1 SV=1	2	110.2	143.3	174.3	CSTF1	1.21633	0.282534
A0A0K2GN21	BCKDHB protein OS=Homo sapiens GN=BCKDHB PE=4 SV=1	2	30.3	166	201.9	BCKDHB	1.21627	0.282458
O95744	Putative postmeiotic segregation increased 2-like protein 2 OS=Homo sapiens GN=PMS2P2 PE=5 SV=1	1	38.7	56.9	69.2	PMS2P6	1.21617	0.282343
P46939	Utrophin OS=Homo sapiens GN=UTRN PE=1 SV=2	2	220.6	359.8	437.5	UTRN	1.21595	0.282088
Q86SQ0	Pleckstrin homology-like domain family B member 2 OS=Homo sapiens GN=PHLDB2 PE=1 SV=2	1	50.5	71.9	87.4	PHLDB2	1.21558	0.281642
B3KNI0	cDNA FLJ14646 fis, clone NT2RP2001883, highly similar to Homo sapiens CGI-01 protein mRNA OS=Homo sapiens PE=2 SV=1	1	71.7	101.6	123.5	METTL13	1.21555	0.281611
P78386	Keratin, type II cuticular Hb5 OS=Homo sapiens GN=KRT85 PE=1 SV=1	1	6725.5	312.7	380.1	KRT85	1.21554	0.2816
Q9BX40	Protein LSM14 homolog B OS=Homo sapiens GN=LSM14B PE=1 SV=1	1	6.9	55.7	67.7	LSM14B	1.21544	0.281479
Q8WXX5	DnaJ homolog subfamily C member 9 OS=Homo sapiens GN=DNAJC9 PE=1 SV=1	2	35.8	46.5	56.5	DNAJC9	1.21505	0.28102
E9PB61	THO complex subunit 4 OS=Homo sapiens GN=ALYREF PE=1 SV=1	2	102.3	317.8	386.1	ALYREF	1.21492	0.280855
Q15370	Elongin-B OS=Homo sapiens GN=ELOB PE=1 SV=1	2	273.6	657.6	798.8	TCEB2; ELOB	1.21472	0.280624
A0A024R125	Protein kinase, AMP-activated, gamma 1 non-catalytic subunit, isoform CRA_a OS=Homo sapiens GN=PRKAG1 PE=4 SV=1	2	18.4	28.9	35.1	PRKAG1	1.21453	0.280402
Q9P2R3	Rabankyrin-5 OS=Homo sapiens GN=ANKFY1 PE=1 SV=2	2	226.1	211.8	257.2	ANKFY1	1.21435	0.280188
P68366	Tubulin alpha-4A chain OS=Homo sapiens GN=TUBA4A PE=1 SV=1	2	209.2	918	1114.6	TUBA4A	1.21416	0.27996
H0UID3	AP complex subunit beta OS=Homo sapiens GN=AP2B1 PE=3 SV=1	2	763.7	1458.7	1770.9	AP2B1	1.21403	0.2798
Q5SQH4	DBP2 protein OS=Homo sapiens GN=DHX16 PE=2 SV=1	1	36.8	67.3	81.7	DHX16	1.21397	0.27973
Q00839	Heterogeneous nuclear ribonucleoprotein U OS=Homo sapiens GN=HNRNPU PE=1 SV=6	2	1289.5	2798.2	3395.8	HNRNPU	1.21357	0.279252
A0A024QZY5	PRP4 pre-mRNA processing factor 4 homolog B (Yeast), isoform CRA_a OS=Homo sapiens GN=PRPF4B PE=4 SV=1	2	106.1	208.4	252.9	PRPF4B	1.21353	0.279212
A0A024R1Q8	Ribosomal protein L23, isoform CRA_b OS=Homo sapiens GN=RPL23 PE=3 SV=1	2	515.4	2055.3	2494	RPL23	1.21345	0.279112
Q92499	ATP-dependent RNA helicase DDX1 OS=Homo sapiens GN=DDX1 PE=1 SV=2	2	1399.9	2203.6	2673.2	DDX1	1.21311	0.278705
A8K7G2	cDNA FLJ75762, highly similar to Homo sapiens protease, serine, 25 (PRSS25), nuclear gene encodingmitochondrial protein, transcript variant 1, mRNA OS=Homo sapiens PE=2 SV=1	2	43.2	59.8	72.5	HTRA2	1.21237	0.277836
P50748	Kinetochore-associated protein 1 OS=Homo sapiens GN=KNTC1 PE=1 SV=1	1	162.4	271.1	328.6	KNTC1	1.2121	0.277507
E9KL48	Epididymis tissue sperm binding protein Li 18mP OS=Homo sapiens GN=GLUD1 PE=2 SV=1	2	246.7	574.4	696.2	GLUD1	1.21205	0.277446
A0A0S2Z5U3	Heterogeneous nuclear ribonucleoprotein L-like isoform 2 (Fragment) OS=Homo sapiens GN=HNRPLL PE=2 SV=1	2	98.1	197	238.7	HNRNPLL; HNRPLL	1.21168	0.277003
B3KNU0	cDNA FLJ30470 fis, clone BRAWH1000040, highly similar to Rap1 GTPase-GDP dissociation stimulator 1 OS=Homo sapiens PE=2 SV=1	2	20.5	44.9	54.4	RAP1GDS1	1.21158	0.276891
Q9UNZ5	Leydig cell tumor 10 kDa protein homolog OS=Homo sapiens GN=C19orf53 PE=1 SV=1	2	88.4	174.5	211.4	C19orf53	1.21146	0.276748
Q6FHV6	ENO2 protein OS=Homo sapiens GN=ENO2 PE=1 SV=1	2	107.2	132.1	160	ENO2	1.2112	0.276441
Q7L3S4	Zinc finger protein 771 OS=Homo sapiens GN=ZNF771 PE=1 SV=1	2	10.5	31.8	38.5	ZNF771	1.21069	0.275832
Q9NR09	Baculoviral IAP repeat-containing protein 6 OS=Homo sapiens GN=BIRC6 PE=1 SV=2	2	35.3	92.1	111.5	BIRC6	1.21064	0.275771
A0A0S2Z4A5	DNA helicase (Fragment) OS=Homo sapiens GN=MCM7 PE=2 SV=1	2	148.6	264.1	319.7	MCM7	1.21053	0.275634
Q9H0N5	Pterin-4-alpha-carbinolamine dehydratase 2 OS=Homo sapiens GN=PCBD2 PE=1 SV=4	2	27	41.9	50.7	PCBD2	1.21002	0.275036
A0A0A6YY96	Iron-responsive element-binding protein 2 OS=Homo sapiens GN=IREB2 PE=1 SV=1	2	31	52.9	64		1.20983	0.274804
B3KM36	cDNA FLJ10153 fis, clone HEMBA1003417, highly similar to BAG family molecular chaperone regulator 2 OS=Homo sapiens PE=2 SV=1	2	138.6	1730.9	2093.8	BAG2	1.20966	0.274601
F5H5D3	Tubulin alpha chain OS=Homo sapiens GN=TUBA1C PE=1 SV=1	2	1940.9	9668.7	11695.6	TUBA1C	1.20964	0.274572
Q8WW12	PEST proteolytic signal-containing nuclear protein OS=Homo sapiens GN=PCNP PE=1 SV=2	2	165.6	232.4	281	PCNP	1.20912	0.27396
Q549N0	Cofilin 2 (Muscle), isoform CRA_a OS=Homo sapiens GN=CFL2 PE=1 SV=1	2	22.6	27.8	33.6	CFL2	1.20863	0.273376
A6NEM2	Host cell factor 1 OS=Homo sapiens GN=HCFC1 PE=1 SV=2	2	76.3	162.2	195.9	HCFC1	1.20777	0.272344
A8K940	cDNA FLJ77630, highly similar to Homo sapiens BPY2 interacting protein 1, mRNA OS=Homo sapiens PE=1 SV=1	2	112	233	281.3	MAP1S	1.2073	0.27178
A0A024RDQ8	Replication factor C (Activator 1) 3, 38kDa, isoform CRA_a OS=Homo sapiens GN=RFC3 PE=4 SV=1	1	11.3	30.4	36.7	RFC3	1.20724	0.271709
Q15942	Zyxin OS=Homo sapiens GN=ZYX PE=1 SV=1	2	400.8	589.4	711	ZYX	1.20631	0.270602
Q13724	Mannosyl-oligosaccharide glucosidase OS=Homo sapiens GN=MOGS PE=1 SV=5	2	25.9	74.7	90.1	MOGS	1.20616	0.270419
A0A024R4Z9	SET binding factor 1, isoform CRA_a OS=Homo sapiens GN=SBF1 PE=3 SV=1	2	125	300.8	362.6	SBF1	1.20545	0.269574
Q86VX4	Structural maintenance of chromosomes protein OS=Homo sapiens GN=SMC3 PE=2 SV=1	2	680.5	1076.6	1297.5	SMC3	1.20518	0.269252
A8K3C8	cDNA FLJ78308, highly similar to Homo sapiens praja 1 (PJA1), mRNA OS=Homo sapiens PE=2 SV=1	1	9.4	78.5	94.6	PJA1	1.2051	0.269148
Q9H832	Ubiquitin-conjugating enzyme E2 Z OS=Homo sapiens GN=UBE2Z PE=1 SV=2	2	34.1	61.5	74.1	UBE2Z	1.20488	0.268887
A0A060VCV0	MHC class I antigen OS=Homo sapiens GN=HLA-C PE=3 SV=1	2	18	74.2	89.4	HLA-C	1.20485	0.268856
P41250	Glycine--tRNA ligase OS=Homo sapiens GN=GARS PE=1 SV=3	2	289.5	297.4	358.2	GARS	1.20444	0.268361
Q9NQW6	Anillin OS=Homo sapiens GN=ANLN PE=1 SV=2	2	38.2	64.1	77.2	ANLN	1.20437	0.268276
B4DHQ3	Phosphoserine aminotransferase OS=Homo sapiens PE=2 SV=1	2	115.6	98.4	118.5	PSAT1	1.20427	0.268157
A0A075B7D0	Immunoglobulin heavy variable 1/OR15-1 (non-functional) (Fragment) OS=Homo sapiens GN=IGHV1OR15-1 PE=1 SV=1	2	90.3	100.9	121.5		1.20416	0.26803
Q96KG9	N-terminal kinase-like protein OS=Homo sapiens GN=SCYL1 PE=1 SV=1	2	136.7	174.5	210.1	SCYL1	1.20401	0.267849
Q9NQX3	Gephyrin OS=Homo sapiens GN=GPHN PE=1 SV=1	1	57.4	92.3	111.1	GPHN	1.20368	0.267456
B4DT31	cDNA FLJ53425, highly similar to Far upstream element-binding protein 1 OS=Homo sapiens PE=2 SV=1	1	207.5	338	406.7	FUBP1	1.20325	0.266942
Q14119	Vascular endothelial zinc finger 1 OS=Homo sapiens GN=VEZF1 PE=1 SV=2	2	49.4	186.3	224	VEZF1	1.20236	0.265871
Q9P2K8	eIF-2-alpha kinase GCN2 OS=Homo sapiens GN=EIF2AK4 PE=1 SV=3	2	70.8	136.5	164.1	EIF2AK4	1.2022	0.265674
O00178	GTP-binding protein 1 OS=Homo sapiens GN=GTPBP1 PE=1 SV=3	2	63.9	158.8	190.9	GTPBP1	1.20214	0.265606
A0A024RBA9	RAB21, member RAS oncogene family, isoform CRA_a OS=Homo sapiens GN=RAB21 PE=4 SV=1	2	17.7	28.8	34.6	RAB21	1.20139	0.264703
P12270	Nucleoprotein TPR OS=Homo sapiens GN=TPR PE=1 SV=3	2	343.1	545.8	655.5	TPR	1.20099	0.264223
B3KRJ9	cDNA FLJ34439 fis, clone HLUNG2001146, highly similar to Splicing factor, arginine/serine-rich 12 OS=Homo sapiens PE=2 SV=1	2	92.6	129.9	156	SREK1	1.20092	0.264145
A0A024R4H4	Kinesin family member 1B, isoform CRA_b OS=Homo sapiens GN=KIF1B PE=3 SV=1	2	27.2	46.1	55.3	KIF1B	1.19957	0.262513
Q09666	Neuroblast differentiation-associated protein AHNAK OS=Homo sapiens GN=AHNAK PE=1 SV=2	2	6271.3	9437.8	11320.6	AHNAK	1.1995	0.262428
Q15181	Inorganic pyrophosphatase OS=Homo sapiens GN=PPA1 PE=1 SV=2	2	24.5	35.1	42.1	PPA1	1.19943	0.262349
Q504R6	RAB13 protein (Fragment) OS=Homo sapiens GN=RAB13 PE=2 SV=1	2	53.6	106.4	127.6	RAB13	1.19925	0.26213
P23497	Nuclear autoantigen Sp-100 OS=Homo sapiens GN=SP100 PE=1 SV=3	2	15.4	29.7	35.6	SP100	1.19865	0.261414
B4DJQ5	cDNA FLJ59211, highly similar to Glucosidase 2 subunit beta OS=Homo sapiens PE=2 SV=1	2	125.7	331.8	397.6	PRKCSH	1.19831	0.261004
C9J2R5	Lipoma-preferred partner (Fragment) OS=Homo sapiens GN=LPP PE=1 SV=8	2	69.5	103.9	124.5		1.19827	0.26095
A0A024RA85	Cell division cycle 2-like 5 (Cholinesterase-related cell division controller), isoform CRA_a OS=Homo sapiens GN=CDC2L5 PE=4 SV=1	1	234.2	519	621.9	CDK13	1.19827	0.260948
P48201	ATP synthase F(0) complex subunit C3, mitochondrial OS=Homo sapiens GN=ATP5G3 PE=2 SV=1	1	25	43.5	52.1	ATP5G3	1.1977	0.260268
A0A0S2Z491	Nucleophosmin isoform 2 (Fragment) OS=Homo sapiens GN=NPM1 PE=2 SV=1	2	1023.8	5663.9	6782.4	NPM1	1.19748	0.26
Q9BUF5	Tubulin beta-6 chain OS=Homo sapiens GN=TUBB6 PE=1 SV=1	2	107.9	383.4	459	TUBB6	1.19718	0.259644
Q05D08	PA2G4 protein (Fragment) OS=Homo sapiens GN=PA2G4 PE=2 SV=1	2	571.5	1634.5	1955.9	PA2G4	1.19664	0.258983
Q86YV9	Hermansky-Pudlak syndrome 6 protein OS=Homo sapiens GN=HPS6 PE=1 SV=1	1	17.5	70.7	84.6	HPS6	1.19661	0.258947
A0A024R3M1	Thymocyte nuclear protein 1, isoform CRA_a OS=Homo sapiens GN=THYN1 PE=4 SV=1	2	159.6	298.6	357.2	THYN1	1.19625	0.258518
B4DPP6	cDNA FLJ54371, highly similar to Serum albumin OS=Homo sapiens PE=2 SV=1	2	553.2	794.5	950.4	ALB	1.19622	0.258488
Q14683	Structural maintenance of chromosomes protein 1A OS=Homo sapiens GN=SMC1A PE=1 SV=2	2	324.2	883	1056.2	SMC1A	1.19615	0.258398
Q9P2K1	Coiled-coil and C2 domain-containing protein 2A OS=Homo sapiens GN=CC2D2A PE=1 SV=3	1	50	101.1	120.9	CC2D2A	1.19585	0.258031
B7ZM99	MTHFD1L protein OS=Homo sapiens GN=MTHFD1L PE=1 SV=1	2	75.6	116	138.7	MTHFD1L	1.19569	0.257843
Q6N0B1	Succinate-CoA ligase subunit beta (Fragment) OS=Homo sapiens GN=DKFZp686D0880 PE=2 SV=1	2	26.7	103.4	123.6	SUCLA2	1.19536	0.257443
P49321	Nuclear autoantigenic sperm protein OS=Homo sapiens GN=NASP PE=1 SV=2	2	87	109.1	130.4	NASP	1.19523	0.257293
P46734	Dual specificity mitogen-activated protein kinase kinase 3 OS=Homo sapiens GN=MAP2K3 PE=1 SV=2	2	76.1	199.9	238.9	MAP2K3	1.1951	0.257128
Q05209	Tyrosine-protein phosphatase non-receptor type 12 OS=Homo sapiens GN=PTPN12 PE=1 SV=3	2	42.1	79.5	95	PTPN12	1.19497	0.256973
A0A1B0GTU4	Paxillin OS=Homo sapiens GN=PXN PE=1 SV=1	2	124.8	202.3	241.7		1.19476	0.256721
Q8N9E0	Protein FAM133A OS=Homo sapiens GN=FAM133A PE=1 SV=1	1	93	94	112.3	FAM133A	1.19468	0.256625
F8VW96	Cysteine and glycine-rich protein 2 OS=Homo sapiens GN=CSRP2 PE=1 SV=1	2	139	235.9	281.8	CSRP2	1.19457	0.256496
E5KNY5	Leucine-rich PPR-motif containing OS=Homo sapiens GN=LRPPRC PE=4 SV=1	2	526.5	2180	2604.1	LRPPRC	1.19454	0.256457
A8K517	Ribosomal protein S23, isoform CRA_a OS=Homo sapiens GN=RPS23 PE=2 SV=1	2	414.3	2620.3	3129.3	RPS23	1.19425	0.256108
Q96N66	Lysophospholipid acyltransferase 7 OS=Homo sapiens GN=MBOAT7 PE=1 SV=2	2	11.2	23.7	28.3	MBOAT7	1.19409	0.255915
A0A024RDE5	Ras-GTPase activating protein SH3 domain-binding protein 2, isoform CRA_a OS=Homo sapiens GN=G3BP2 PE=4 SV=1	2	48.1	266.6	318.2	G3BP2	1.19355	0.255257
Q5T6F2	Ubiquitin-associated protein 2 OS=Homo sapiens GN=UBAP2 PE=1 SV=1	1	106.4	165.5	197.5	UBAP2	1.19335	0.255021
P07741	Adenine phosphoribosyltransferase OS=Homo sapiens GN=APRT PE=1 SV=2	2	49.3	63.1	75.3	APRT	1.19334	0.25501
P08572	Collagen alpha-2(IV) chain OS=Homo sapiens GN=COL4A2 PE=1 SV=4	2	31.6	106.7	127.3	COL4A2	1.19306	0.254672
A0A024R6W2	Nudix (Nucleoside diphosphate linked moiety X)-type motif 21, isoform CRA_a OS=Homo sapiens GN=NUDT21 PE=4 SV=1	2	97.3	158.5	189.1	NUDT21	1.19306	0.254667
Q99567	Nuclear pore complex protein Nup88 OS=Homo sapiens GN=NUP88 PE=1 SV=2	2	127.7	289	344.7	NUP88	1.19273	0.254272
P51116	Fragile X mental retardation syndrome-related protein 2 OS=Homo sapiens GN=FXR2 PE=1 SV=2	2	73.2	310	369.4	FXR2	1.19161	0.252916
Q59EH3	Acid phosphatase 1 isoform c variant (Fragment) OS=Homo sapiens PE=2 SV=1	2	18.9	24.6	29.3	ACP1	1.19106	0.252242
A8K132	cDNA FLJ75476, highly similar to Homo sapiens glutaminase (GLS), mRNA OS=Homo sapiens PE=2 SV=1	2	74.4	107.1	127.5	GLS	1.19048	0.251539
Q14331	Protein FRG1 OS=Homo sapiens GN=FRG1 PE=1 SV=1	2	14.7	58.3	69.4	FRG1	1.19039	0.25144
A8K6Q8	cDNA FLJ75881, highly similar to Homo sapiens transferrin receptor (p90, CD71) (TFRC), mRNA OS=Homo sapiens PE=2 SV=1	2	297.5	365.6	435.2	TFRC	1.19037	0.251412
Q8N5F7	NF-kappa-B-activating protein OS=Homo sapiens GN=NKAP PE=1 SV=1	2	132.5	223.9	266.5	NKAP	1.19026	0.251281
A0A1B0GUS7	Protein unc-13 homolog B OS=Homo sapiens GN=UNC13B PE=1 SV=1	2	153.1	162.1	192.9		1.19001	0.250969
O43251	RNA binding protein fox-1 homolog 2 OS=Homo sapiens GN=RBFOX2 PE=1 SV=3	1	65.3	131.6	156.6	RBFOX2	1.18997	0.250925
A0A024R0C3	Nicotinamide nucleotide transhydrogenase, isoform CRA_a OS=Homo sapiens GN=NNT PE=4 SV=1	2	1.7	62.2	74	NNT	1.18971	0.250611
F1T0L5	ATP-dependent RNA helicase DDX51 OS=Homo sapiens GN=DDX51 PE=2 SV=1	1	43.1	48.5	57.7	DDX51	1.18969	0.250587
Q08257	Quinone oxidoreductase OS=Homo sapiens GN=CRYZ PE=1 SV=1	2	51.1	108.6	129.2	CRYZ	1.18969	0.250582
Q12756	Kinesin-like protein KIF1A OS=Homo sapiens GN=KIF1A PE=1 SV=2	1	2.4	37.5	44.6	KIF1A	1.18933	0.250153
O43719	HIV Tat-specific factor 1 OS=Homo sapiens GN=HTATSF1 PE=1 SV=1	2	51.2	69.8	83	HTATSF1	1.18911	0.249884
O95817	BAG family molecular chaperone regulator 3 OS=Homo sapiens GN=BAG3 PE=1 SV=3	2	215.1	1204	1431.3	BAG3	1.18879	0.249491
P11441	Ubiquitin-like protein 4A OS=Homo sapiens GN=UBL4A PE=1 SV=1	1	34.7	343.5	408.3	UBL4A	1.18865	0.249319
Q96EE3	Nucleoporin SEH1 OS=Homo sapiens GN=SEH1L PE=1 SV=3	2	61.8	149.1	177.2	SEH1L	1.18846	0.249098
D4YW74	Polytrophin OS=Homo sapiens GN=TROPH PE=2 SV=1	1	26.9	42.5	50.5	SYNE2	1.18824	0.248821
Q9Y3I0	tRNA-splicing ligase RtcB homolog OS=Homo sapiens GN=RTCB PE=1 SV=1	2	1479.1	2343.8	2784.6	C22orf28; RTCB	1.18807	0.248621
A8K2T7	Receptor protein-tyrosine kinase OS=Homo sapiens PE=2 SV=1	2	82.7	189.3	224.8	EGFR	1.18753	0.247968
P27694	Replication protein A 70 kDa DNA-binding subunit OS=Homo sapiens GN=RPA1 PE=1 SV=2	2	189.4	169.1	200.8	RPA1	1.18746	0.247883
O43660	Pleiotropic regulator 1 OS=Homo sapiens GN=PLRG1 PE=1 SV=1	1	18.3	39.5	46.9	PLRG1	1.18734	0.247735
O14828	Secretory carrier-associated membrane protein 3 OS=Homo sapiens GN=SCAMP3 PE=1 SV=3	2	15.7	107	127	SCAMP3	1.18692	0.247218
A0A087WUT6	Eukaryotic translation initiation factor 5B OS=Homo sapiens GN=EIF5B PE=1 SV=1	2	502.4	2350.3	2789.1		1.1867	0.246955
B5BU61	Histone deacetylase OS=Homo sapiens GN=HDAC1 PE=2 SV=1	2	188.9	593.7	704.1	HDAC1	1.18595	0.246046
A8K8N7	Phosphoribosylformylglycinamidine synthase (FGAR amidotransferase), isoform CRA_b OS=Homo sapiens GN=PFAS PE=2 SV=1	2	229.7	294.3	348.9	PFAS	1.18552	0.245526
Q9NQW7	Xaa-Pro aminopeptidase 1 OS=Homo sapiens GN=XPNPEP1 PE=1 SV=3	2	57.4	69.6	82.5	XPNPEP1	1.18534	0.245307
B1AK66	Smad nuclear interacting protein 1 OS=Homo sapiens GN=SNIP1 PE=2 SV=1	1	76.6	98.9	117.2	SNIP1	1.18504	0.24493
P17040	Zinc finger and SCAN domain-containing protein 20 OS=Homo sapiens GN=ZSCAN20 PE=2 SV=3	2	9.3	30.3	35.9	ZSCAN20	1.18482	0.244666
Q562R1	Beta-actin-like protein 2 OS=Homo sapiens GN=ACTBL2 PE=1 SV=2	2	28	43.9	52	ACTBL2	1.18451	0.244291
Q9UKJ3	G patch domain-containing protein 8 OS=Homo sapiens GN=GPATCH8 PE=1 SV=2	2	120.4	1089.8	1290	GPATCH8	1.1837	0.243308
A8K7D9	Importin subunit alpha OS=Homo sapiens PE=2 SV=1	2	177.2	575.6	681.3	KPNA2	1.18363	0.243224
Q5T5H1	Alpha-endosulfine OS=Homo sapiens GN=ENSA PE=1 SV=1	2	36.3	37.1	43.9	ENSA	1.18329	0.242802
D3DV26	S100 calcium binding protein A10 (Annexin II ligand, calpactin I, light polypeptide (P11)), isoform CRA_b (Fragment) OS=Homo sapiens GN=S100A10 PE=4 SV=1	2	169	312.8	370	S100A10	1.18286	0.242285
A0A024RD03	Mitochondrial ribosomal protein S10, isoform CRA_a OS=Homo sapiens GN=MRPS10 PE=4 SV=1	1	29.7	94.1	111.3	MRPS10	1.18278	0.242187
Q9Y520	Protein PRRC2C OS=Homo sapiens GN=PRRC2C PE=1 SV=4	2	716.6	2382.4	2816.7	PRRC2C	1.1823	0.24159
P43246	DNA mismatch repair protein Msh2 OS=Homo sapiens GN=MSH2 PE=1 SV=1	2	111.3	179	211.6	MSH2	1.18212	0.24138
P14174	Macrophage migration inhibitory factor OS=Homo sapiens GN=MIF PE=1 SV=4	1	57.6	45.7	54	MIF	1.18162	0.240765
Q9BXP5	Serrate RNA effector molecule homolog OS=Homo sapiens GN=SRRT PE=1 SV=1	2	44.4	108	127.6	SRRT	1.18148	0.240597
B2RD27	cDNA, FLJ96428, highly similar to Homo sapiens proteasome (prosome, macropain) 26S subunit, non-ATPase, 7 (Mov34 homolog) (PSMD7), mRNA OS=Homo sapiens PE=2 SV=1	2	87.7	125.2	147.9	PSMD7	1.18131	0.240387
A0A0A6YZ17	Ubiquitinyl hydrolase 1 OS=Homo sapiens PE=2 SV=1	1	37.3	55.2	65.2	USP13	1.18116	0.240204
P26583	High mobility group protein B2 OS=Homo sapiens GN=HMGB2 PE=1 SV=2	2	605.9	1115.1	1316.9	HMGB2	1.18097	0.239973
B4DYY5	cDNA FLJ55671, highly similar to Ubiquitin-associated protein 2-like OS=Homo sapiens PE=2 SV=1	2	28.9	50.3	59.4	UBAP2L	1.18091	0.239905
P29317	Ephrin type-A receptor 2 OS=Homo sapiens GN=EPHA2 PE=1 SV=2	2	63.5	74.1	87.5	EPHA2	1.18084	0.239809
B4DGE7	cDNA FLJ61235, weakly similar to WD repeat protein YBL104C OS=Homo sapiens PE=2 SV=1	1	15.1	44.9	53	MIOS	1.1804	0.239277
A0A0C4DG89	Probable ATP-dependent RNA helicase DDX46 OS=Homo sapiens GN=DDX46 PE=1 SV=1	2	1274.1	1396.5	1647.7	DDX46	1.17988	0.238638
B7Z8F4	cDNA FLJ56523, highly similar to ATP-dependent RNA helicase DHX8 (EC 3.6.1.-) OS=Homo sapiens PE=2 SV=1	1	3.5	17.8	21	DHX8	1.17978	0.238512
P49406	39S ribosomal protein L19, mitochondrial OS=Homo sapiens GN=MRPL19 PE=1 SV=2	2	130.3	437.9	516.6	MRPL19	1.17972	0.238446
A0A1U9X836	NEU1 OS=Homo sapiens PE=4 SV=1	1	58.8	80.2	94.6	NEU1	1.17955	0.238238
A0A087X1Z3	Proteasome activator complex subunit 2 OS=Homo sapiens GN=PSME2 PE=1 SV=1	2	126.7	138.8	163.7		1.17939	0.238047
A0A140VJK2	Glycerol-3-phosphate dehydrogenase OS=Homo sapiens PE=2 SV=1	2	32.7	48	56.6	GPD2	1.17917	0.237768
Q14247	Src substrate cortactin OS=Homo sapiens GN=CTTN PE=1 SV=2	2	1365.9	1310.9	1545.4	CTTN	1.17888	0.237423
Q9HAV7	GrpE protein homolog 1, mitochondrial OS=Homo sapiens GN=GRPEL1 PE=1 SV=2	2	156.3	285	335.9	GRPEL1	1.1786	0.23707
V9HWE0	Annexin OS=Homo sapiens GN=HEL-S-7 PE=2 SV=1	2	418.4	742.6	874.9	ANXA5	1.17816	0.236533
P51617	Interleukin-1 receptor-associated kinase 1 OS=Homo sapiens GN=IRAK1 PE=1 SV=2	1	95.4	65.7	77.4	IRAK1	1.17808	0.23644
P52888	Thimet oligopeptidase OS=Homo sapiens GN=THOP1 PE=1 SV=2	2	17.3	25.3	29.8	THOP1	1.17787	0.236175
Q8IZH2	5'-3' exoribonuclease 1 OS=Homo sapiens GN=XRN1 PE=1 SV=1	2	170.2	471.4	555.2	XRN1	1.17777	0.236056
O14980	Exportin-1 OS=Homo sapiens GN=XPO1 PE=1 SV=1	2	354.2	506.6	596.6	XPO1	1.17765	0.235917
P63172	Dynein light chain Tctex-type 1 OS=Homo sapiens GN=DYNLT1 PE=1 SV=1	2	20.3	504.5	594.1	DYNLT1	1.1776	0.235852
V9HW80	Epididymis luminal protein 220 OS=Homo sapiens GN=HEL-S-70 PE=1 SV=1	2	2375.1	2387.5	2809.8	VCP	1.17688	0.234967
A8K1F4	cDNA FLJ78094, highly similar to Homo sapiens myeloid leukemia factor 2, mRNA OS=Homo sapiens PE=1 SV=1	2	9.6	23.2	27.3	MLF2	1.17672	0.234776
D3DS14	Uncharacterized protein OS=Homo sapiens GN=FLJ10357 PE=4 SV=1	2	78.6	427.2	502.3	ARHGEF40	1.1758	0.233638
B4DJQ6	cDNA FLJ56630, highly similar to Homo sapiens phospholipase D family, member 4 (PLD4), mRNA OS=Homo sapiens PE=2 SV=1	1	99	120.6	141.8	PLD4	1.17579	0.233628
O00425	Insulin-like growth factor 2 mRNA-binding protein 3 OS=Homo sapiens GN=IGF2BP3 PE=1 SV=2	2	592.9	3176.1	3733.7	IGF2BP3	1.17556	0.23335
P36957	Dihydrolipoyllysine-residue succinyltransferase component of 2-oxoglutarate dehydrogenase complex, mitochondrial OS=Homo sapiens GN=DLST PE=1 SV=4	2	157.1	362.9	426.6	DLST	1.17553	0.233312
A0A023T787	RNA-binding protein 8A OS=Homo sapiens GN=RBM8 PE=2 SV=1	2	25.3	73.7	86.6	RBM8A; LOC101060541	1.17503	0.232702
P46977	Dolichyl-diphosphooligosaccharide--protein glycosyltransferase subunit STT3A OS=Homo sapiens GN=STT3A PE=1 SV=2	2	73.6	175.3	205.9	STT3A	1.17456	0.232118
H3BS72	Very-long-chain (3R)-3-hydroxyacyl-CoA dehydratase OS=Homo sapiens GN=HACD3 PE=1 SV=1	2	26.4	52.2	61.3		1.17433	0.231837
Q13425	Beta-2-syntrophin OS=Homo sapiens GN=SNTB2 PE=1 SV=1	2	132	196.6	230.8	SNTB2	1.17396	0.23138
Q96JN8	Neuralized-like protein 4 OS=Homo sapiens GN=NEURL4 PE=1 SV=2	1	10.3	80.5	94.5	NEURL4	1.17391	0.231326
Q9P0K7	Ankycorbin OS=Homo sapiens GN=RAI14 PE=1 SV=2	2	638.8	1273.8	1495.3	RAI14	1.17389	0.231296
B7Z952	cDNA FLJ54827, highly similar to Alpha-parvin OS=Homo sapiens PE=2 SV=1	2	123.3	121.4	142.5	PARVA	1.17381	0.231193
P23508	Colorectal mutant cancer protein OS=Homo sapiens GN=MCC PE=1 SV=2	1	45.2	77.1	90.5	MCC	1.1738	0.231187
A0A024R880	Cyclin-dependent kinase 9 (CDC2-related kinase), isoform CRA_a OS=Homo sapiens GN=CDK9 PE=3 SV=1	2	26.1	43.8	51.4	CDK9	1.17352	0.230837
A0A024R7L2	HSPC142 protein, isoform CRA_a OS=Homo sapiens GN=HSPC142 PE=4 SV=1	2	9.8	66.6	78.1	BABAM1	1.17267	0.2298
P55263	Adenosine kinase OS=Homo sapiens GN=ADK PE=1 SV=2	2	459.6	410.7	481.6	ADK	1.17263	0.22975
A0A0S2Z559	V-raf-1 murine leukemia viral oncogene-like protein 1 isoform 2 (Fragment) OS=Homo sapiens GN=RAF1 PE=2 SV=1	1	82.3	165.9	194.5	RAF1	1.17239	0.229456
Q86UP2	Kinectin OS=Homo sapiens GN=KTN1 PE=1 SV=1	2	397	896.1	1050.5	KTN1	1.1723	0.229345
Q92626	Peroxidasin homolog OS=Homo sapiens GN=PXDN PE=1 SV=2	2	75.4	161.9	189.7	PXDN	1.17171	0.228617
B2RD00	cDNA, FLJ96396, highly similar to Homo sapiens ERO1-like beta (S. cerevisiae) (ERO1LB), mRNA OS=Homo sapiens PE=2 SV=1	1	34.4	36.7	43	ERO1LB; ERO1B	1.17166	0.228557
Q2NL82	Pre-rRNA-processing protein TSR1 homolog OS=Homo sapiens GN=TSR1 PE=1 SV=1	2	31.7	47.8	56	TSR1	1.17155	0.228416
B2R983	cDNA, FLJ94267, highly similar to Homo sapiens glutathione S-transferase omega 1 (GSTO1), mRNA OS=Homo sapiens PE=2 SV=1	2	258.1	447.2	523.9	GSTO1	1.17151	0.228371
P61927	60S ribosomal protein L37 OS=Homo sapiens GN=RPL37 PE=1 SV=2	2	166.8	473.7	554.6	RPL37	1.17078	0.227474
V9HW26	ATP synthase subunit alpha OS=Homo sapiens GN=HEL-S-123m PE=1 SV=1	2	623.9	1172	1372	ATP5A1	1.17065	0.227308
Q9GZT9	Egl nine homolog 1 OS=Homo sapiens GN=EGLN1 PE=1 SV=1	2	50	115.5	135.2	EGLN1	1.17056	0.227202
Q14315	Filamin-C OS=Homo sapiens GN=FLNC PE=1 SV=3	2	5776.8	6278.8	7345.7	FLNC	1.16992	0.226411
Q99623	Prohibitin-2 OS=Homo sapiens GN=PHB2 PE=1 SV=2	2	173.2	320.8	375.3	PHB2	1.16989	0.22637
Q5RKV6	Exosome complex component MTR3 OS=Homo sapiens GN=EXOSC6 PE=1 SV=1	2	23.6	44.8	52.4	EXOSC6	1.16964	0.226068
A0A024R0Q5	Protein phosphatase 1, regulatory (Inhibitor) subunit 13 like, isoform CRA_a OS=Homo sapiens GN=PPP1R13L PE=4 SV=1	2	170.4	393.7	460.3	PPP1R13L	1.16916	0.225478
Q96AG4	Leucine-rich repeat-containing protein 59 OS=Homo sapiens GN=LRRC59 PE=1 SV=1	2	160.2	361.4	422.5	LRRC59	1.16906	0.225355
Q15057	Arf-GAP with coiled-coil, ANK repeat and PH domain-containing protein 2 OS=Homo sapiens GN=ACAP2 PE=1 SV=3	2	37	63	73.6	ACAP2	1.16825	0.224354
P07686	Beta-hexosaminidase subunit beta OS=Homo sapiens GN=HEXB PE=1 SV=3	2	124.1	292.1	341.2	HEXB	1.16809	0.224155
Q8NHP8	Putative phospholipase B-like 2 OS=Homo sapiens GN=PLBD2 PE=1 SV=2	2	540	697.1	814.2	PLBD2	1.16798	0.224018
A0A024RAI1	ARP3 actin-related protein 3 homolog (Yeast), isoform CRA_a OS=Homo sapiens GN=ACTR3 PE=3 SV=1	2	431.3	627.9	733.2	ACTR3	1.1677	0.223672
Q14157	Ubiquitin-associated protein 2-like OS=Homo sapiens GN=UBAP2L PE=1 SV=2	2	411.7	780.5	911.3	UBAP2L	1.16758	0.223527
Q96I51	RCC1-like G exchanging factor-like protein OS=Homo sapiens GN=RCC1L PE=1 SV=2	1	98.4	141	164.6	WBSCR16; RCC1L	1.16738	0.223269
Q9UBF2	Coatomer subunit gamma-2 OS=Homo sapiens GN=COPG2 PE=1 SV=1	2	85.6	237.4	277.1	COPG2	1.16723	0.223087
A0A158RFU6	RAB7, member RAS oncogene family, isoform CRA_a OS=Homo sapiens GN=RAB7A PE=2 SV=1	2	69.9	102.8	119.9	RAB7A	1.16634	0.221991
A8K8U1	cDNA FLJ77762, highly similar to Homo sapiens cullin-associated and neddylation-dissociated 1 (CAND1), mRNA OS=Homo sapiens PE=2 SV=1	2	521.8	652.9	761.4	CAND1	1.16618	0.221793
A8QI98	DIS3 OS=Homo sapiens PE=2 SV=1	2	25.6	30.2	35.2	DIS3	1.16556	0.221027
B4DUC8	S-methyl-5'-thioadenosine phosphorylase OS=Homo sapiens GN=MTAP PE=1 SV=1	2	28.2	45.3	52.8	MTAP	1.16556	0.221027
P34897	Serine hydroxymethyltransferase, mitochondrial OS=Homo sapiens GN=SHMT2 PE=1 SV=3	2	502.8	607.5	708	SHMT2	1.16543	0.220865
Q9BZR9	Probable E3 ubiquitin-protein ligase TRIM8 OS=Homo sapiens GN=TRIM8 PE=1 SV=2	2	58.7	116.8	136.1	TRIM8	1.16524	0.220627
A0A024R3Z5	LanC lantibiotic synthetase component C-like 1 (Bacterial), isoform CRA_b OS=Homo sapiens GN=LANCL1 PE=4 SV=1	2	388.4	625.2	728.4	LANCL1	1.16507	0.220413
Q9UBS4	DnaJ homolog subfamily B member 11 OS=Homo sapiens GN=DNAJB11 PE=1 SV=1	2	411.2	938	1092.7	DNAJB11	1.16493	0.220238
P58335	Anthrax toxin receptor 2 OS=Homo sapiens GN=ANTXR2 PE=1 SV=5	1	16.3	62	72.2	ANTXR2	1.16452	0.219731
Q969T4	Ubiquitin-conjugating enzyme E2 E3 OS=Homo sapiens GN=UBE2E3 PE=1 SV=1	2	52.3	54.1	63	UBE2E3	1.16451	0.219723
B3KQM3	Receptor-interacting serine/threonine-protein kinase 2 OS=Homo sapiens PE=2 SV=1	1	53.5	72.4	84.3	RIPK2	1.16436	0.219543
Q6IAW5	CALU protein OS=Homo sapiens GN=CALU PE=2 SV=1	2	679	1504.1	1750.8	CALU	1.16402	0.219114
A0A1W2PNP0	GPI transamidase component PIG-T (Fragment) OS=Homo sapiens GN=PIGT PE=1 SV=1	2	20.9	47	54.7		1.16383	0.21888
Q9H936	Mitochondrial glutamate carrier 1 OS=Homo sapiens GN=SLC25A22 PE=1 SV=1	2	3.1	27.5	32	SLC25A22	1.16364	0.21864
Q5U000	Cathepsin Z OS=Homo sapiens PE=2 SV=1	1	20.7	59.3	69	CTSZ	1.16358	0.218564
V9HW63	Epididymis secretory sperm binding protein Li 97n OS=Homo sapiens GN=HEL-S-97n PE=2 SV=1	2	269.4	306.5	356.5	PRDX4	1.16313	0.218015
A0A024R5W0	Hect (Homologous to the E6-AP (UBE3A) carboxyl terminus) domain and RCC1 (CHC1)-like domain (RLD) 1, isoform CRA_b OS=Homo sapiens GN=HERC1 PE=4 SV=1	1	18.1	63.2	73.5	HERC1	1.16297	0.21782
Q9Y2A7	Nck-associated protein 1 OS=Homo sapiens GN=NCKAP1 PE=1 SV=1	2	245	424.7	493.7	NCKAP1	1.16247	0.217191
B4DDD6	Drebrin-like protein OS=Homo sapiens GN=DBNL PE=1 SV=1	2	20.1	19.7	22.9	DBNL	1.16244	0.217152
P10155	60 kDa SS-A/Ro ribonucleoprotein OS=Homo sapiens GN=TROVE2 PE=1 SV=2	2	127.7	309.2	359.4	TROVE2	1.16235	0.21705
B2R739	cDNA, FLJ93269, highly similar to Homo sapiens mitochondrial ribosomal protein L15 (MRPL15), nuclear gene encoding mitochondrial protein, mRNA OS=Homo sapiens PE=2 SV=1	2	128.9	511.3	594.3	MRPL15	1.16233	0.217021
Q70CQ2	Ubiquitin carboxyl-terminal hydrolase 34 OS=Homo sapiens GN=USP34 PE=1 SV=2	1	50	163.4	189.9	USP34	1.16218	0.216832
Q08945	FACT complex subunit SSRP1 OS=Homo sapiens GN=SSRP1 PE=1 SV=1	2	645	1328.7	1544	SSRP1	1.16204	0.216657
Q9H992	E3 ubiquitin-protein ligase MARCH7 OS=Homo sapiens GN=MARCH7 PE=1 SV=1	1	24.6	50.7	58.9	MARCH7	1.16174	0.216282
P29590	Protein PML OS=Homo sapiens GN=PML PE=1 SV=3	1	25.5	32.8	38.1	PML	1.16159	0.216095
Q5T1Z8	Pumilio homolog 1 OS=Homo sapiens GN=PUM1 PE=1 SV=1	1	159.4	319.1	370.6	PUM1	1.16139	0.215854
Q96KM6	Zinc finger protein 512B OS=Homo sapiens GN=ZNF512B PE=1 SV=1	1	52.1	261	303.1	ZNF512B	1.1613	0.215744
Q15366	Poly(rC)-binding protein 2 OS=Homo sapiens GN=PCBP2 PE=1 SV=1	2	253.8	415.6	482.2	PCBP2	1.16025	0.214436
Q7L775	EPM2A-interacting protein 1 OS=Homo sapiens GN=EPM2AIP1 PE=1 SV=1	2	6.3	23.8	27.6	EPM2AIP1	1.15966	0.213707
D3DR22	Hydroxysteroid (17-beta) dehydrogenase 12, isoform CRA_a OS=Homo sapiens GN=HSD17B12 PE=3 SV=1	2	186.9	289.9	336.1	HSD17B12	1.15937	0.213335
F8J2B5	LIM domain only 7 protein OS=Homo sapiens GN=LMO7 PE=2 SV=1	2	589.7	876.1	1015.5	LMO7	1.15911	0.213023
Q01970	1-phosphatidylinositol 4,5-bisphosphate phosphodiesterase beta-3 OS=Homo sapiens GN=PLCB3 PE=1 SV=2	2	77.1	190.1	220.3	PLCB3	1.15886	0.212711
O43684	Mitotic checkpoint protein BUB3 OS=Homo sapiens GN=BUB3 PE=1 SV=1	2	408.3	607.8	704.2	BUB3	1.1586	0.212389
O60271	C-Jun-amino-terminal kinase-interacting protein 4 OS=Homo sapiens GN=SPAG9 PE=1 SV=4	2	107.1	212.5	246.2	SPAG9	1.15859	0.212368
H0YBX6	Ubiquitin-conjugating enzyme E2 variant 2 (Fragment) OS=Homo sapiens GN=UBE2V2 PE=1 SV=1	2	70.1	99.1	114.8		1.15843	0.212166
P08134	Rho-related GTP-binding protein RhoC OS=Homo sapiens GN=RHOC PE=1 SV=1	2	10.4	13.9	16.1	RHOC	1.15827	0.211976
O95678	Keratin, type II cytoskeletal 75 OS=Homo sapiens GN=KRT75 PE=1 SV=2	1	18.2	31.6	36.6	KRT75	1.15823	0.211919
A0A0A0MTS2	Glucose-6-phosphate isomerase (Fragment) OS=Homo sapiens GN=GPI PE=1 SV=1	2	456	455.2	527.1		1.15795	0.211576
B4DTZ1	cDNA FLJ60154, highly similar to Centrosomal protein of 110 kDa OS=Homo sapiens PE=2 SV=1	1	10.8	36.1	41.8	CCP110	1.15789	0.211504
A0A0M4G3H8	Amylo-alpha-1, 6-glucosidase, 4-alpha-glucanotransferaseprovided OS=Homo sapiens GN=AGL PE=4 SV=1	1	172.7	250.9	290.5	AGL	1.15783	0.211426
P83731	60S ribosomal protein L24 OS=Homo sapiens GN=RPL24 PE=1 SV=1	2	303.2	2261.3	2617.2	RPL24	1.15739	0.210872
P82912	28S ribosomal protein S11, mitochondrial OS=Homo sapiens GN=MRPS11 PE=1 SV=2	2	70.3	627.8	726.1	MRPS11	1.15658	0.209863
Q9BQ39	ATP-dependent RNA helicase DDX50 OS=Homo sapiens GN=DDX50 PE=1 SV=1	2	128.5	283	327.2	DDX50	1.15618	0.209371
G3V3D1	Epididymal secretory protein E1 (Fragment) OS=Homo sapiens GN=NPC2 PE=1 SV=1	2	150.7	242.4	280.2		1.15594	0.209067
B4DEF8	cDNA FLJ61100, highly similar to 39S ribosomal protein L45, mitochondrial OS=Homo sapiens PE=2 SV=1	2	113.5	212.8	245.9	MRPL45	1.15555	0.208574
Q8N9Q2	Protein SREK1IP1 OS=Homo sapiens GN=SREK1IP1 PE=1 SV=1	1	248.6	245.1	283.2	SREK1IP1	1.15545	0.208451
Q8IZD4	mRNA-decapping enzyme 1B OS=Homo sapiens GN=DCP1B PE=1 SV=2	1	19.5	47	54.3	DCP1B	1.15532	0.208291
Q12816	Trophinin OS=Homo sapiens GN=TRO PE=1 SV=3	2	98	191.8	221.5	TRO	1.15485	0.207704
Q9Y5T5	Ubiquitin carboxyl-terminal hydrolase 16 OS=Homo sapiens GN=USP16 PE=1 SV=1	2	52.8	147.3	170.1	USP16	1.15479	0.207626
B0S7P4	MRPS18B OS=Homo sapiens PE=2 SV=1	1	27.4	144.1	166.4	MRPS18B	1.15475	0.207585
A8K0S6	Autophagy-related protein 13 OS=Homo sapiens PE=2 SV=1	2	39.7	175.2	202.3	ATG13	1.15468	0.207494
A8K335	cDNA FLJ76254, highly similar to Homo sapiens gamma-glutamyl hydrolase (GGH), mRNA OS=Homo sapiens PE=2 SV=1	2	65.9	154.2	178	GGH	1.15435	0.207074
M0QXB4	Coatomer protein complex, subunit epsilon, isoform CRA_g OS=Homo sapiens GN=COPE PE=1 SV=1	2	92.7	151.3	174.6	COPE	1.154	0.206642
Q05519	Serine/arginine-rich splicing factor 11 OS=Homo sapiens GN=SRSF11 PE=1 SV=1	2	430.2	522.1	602.5	SRSF11	1.15399	0.206635
G3XAI2	Laminin subunit beta-1 OS=Homo sapiens GN=LAMB1 PE=1 SV=1	2	44.7	101.6	117.2	LAMB1	1.15354	0.206072
Q9UBC2	Epidermal growth factor receptor substrate 15-like 1 OS=Homo sapiens GN=EPS15L1 PE=1 SV=1	2	59.4	81.5	94	EPS15L1	1.15337	0.205861
A0A1X7SBR1	Prickle-like protein 2 OS=Homo sapiens GN=PRICKLE2 PE=1 SV=1	1	18.5	35.9	41.4	PRICKLE2	1.1532	0.205647
Q52LJ0	Protein FAM98B OS=Homo sapiens GN=FAM98B PE=1 SV=1	1	171.2	156.5	180.4	FAM98B	1.15272	0.205037
A8K4K9	cDNA FLJ76169 OS=Homo sapiens PE=2 SV=1	1	43.3	73.5	84.7	EMC2	1.15238	0.204618
A0A0A0MQX8	Muscleblind-like protein 1 OS=Homo sapiens GN=MBNL1 PE=1 SV=1	2	149	354.1	407.8	MBNL1	1.15165	0.203705
B7Z3K9	Fructose-bisphosphate aldolase OS=Homo sapiens PE=2 SV=1	1	65.2	78.5	90.4	ALDOC	1.15159	0.20363
O43175	D-3-phosphoglycerate dehydrogenase OS=Homo sapiens GN=PHGDH PE=1 SV=4	2	182.1	235.6	271.2	PHGDH	1.1511	0.203018
B3KML9	cDNA FLJ11352 fis, clone HEMBA1000020, highly similar to Tubulin beta-2C chain OS=Homo sapiens PE=2 SV=1	2	151.4	343.5	395.4	TUBB4B	1.15109	0.203003
B0YJ88	Radixin OS=Homo sapiens GN=RDX PE=2 SV=1	2	243.8	387.7	446.2	RDX	1.15089	0.20275
Q9Y305	Acyl-coenzyme A thioesterase 9, mitochondrial OS=Homo sapiens GN=ACOT9 PE=1 SV=2	2	201.2	330.1	379.8	ACOT9	1.15056	0.202337
K7ER00	Phenylalanine--tRNA ligase alpha subunit OS=Homo sapiens GN=FARSA PE=1 SV=1	2	48.2	111.8	128.6		1.15027	0.20197
Q7Z4H7	HAUS augmin-like complex subunit 6 OS=Homo sapiens GN=HAUS6 PE=1 SV=2	1	7.7	19.3	22.2	HAUS6	1.15026	0.201959
Q71UA4	Adenylosuccinate lyase OS=Homo sapiens PE=3 SV=1	2	175.1	189.9	218.4	ADSL	1.15008	0.201733
B3KQY7	cDNA FLJ33305 fis, clone BNGH42003529, highly similar to E3 ubiquitin protein ligase TRAF7 (EC 6.3.2.-) OS=Homo sapiens PE=2 SV=1	2	34.7	136.8	157.3	TRAF7	1.14985	0.20145
B4DZR0	cDNA FLJ55529, highly similar to Heat shock 70 kDa protein 4L OS=Homo sapiens PE=2 SV=1	2	116.6	661.9	761	HSPA4L	1.14972	0.201283
Q8IX04	Ubiquitin-conjugating enzyme E2 variant 3 OS=Homo sapiens GN=UEVLD PE=1 SV=2	2	30.3	35.4	40.7	UEVLD	1.14972	0.201279
E7ES52	Cyclin-dependent kinase inhibitor 1B OS=Homo sapiens GN=CDKN1B PE=1 SV=1	2	9.3	25.4	29.2		1.14961	0.20114
Q02252	Methylmalonate-semialdehyde dehydrogenase [acylating], mitochondrial OS=Homo sapiens GN=ALDH6A1 PE=1 SV=2	1	8.1	15.4	17.7	ALDH6A1	1.14935	0.200819
Q14444	Caprin-1 OS=Homo sapiens GN=CAPRIN1 PE=1 SV=2	2	143.9	400.2	459.8	CAPRIN1	1.14893	0.200285
P25311	Zinc-alpha-2-glycoprotein OS=Homo sapiens GN=AZGP1 PE=1 SV=2	1	22	26.2	30.1	AZGP1	1.14885	0.200197
P09543	2',3'-cyclic-nucleotide 3'-phosphodiesterase OS=Homo sapiens GN=CNP PE=1 SV=2	2	147.8	561.1	644.5	CNP	1.14864	0.199922
A0A0S2Z577	Vacuolar protein sorting 33-like protein B isoform 1 (Fragment) OS=Homo sapiens GN=VPS33B PE=2 SV=1	1	17.6	51.2	58.8	VPS33B	1.14844	0.199672
Q96N67	Dedicator of cytokinesis protein 7 OS=Homo sapiens GN=DOCK7 PE=1 SV=4	2	291.5	597	685.6	DOCK7	1.14841	0.199636
Q9NUQ6	SPATS2-like protein OS=Homo sapiens GN=SPATS2L PE=1 SV=2	2	174.3	1304.1	1497.6	SPATS2L	1.14838	0.199598
Q68CZ2	Tensin-3 OS=Homo sapiens GN=TNS3 PE=1 SV=2	2	762.6	1327.3	1524	TNS3	1.1482	0.199368
P84101	Small EDRK-rich factor 2 OS=Homo sapiens GN=SERF2 PE=1 SV=1	1	75.1	92.1	105.7	SERF2	1.14767	0.198702
Q8WXG6	MAP kinase-activating death domain protein OS=Homo sapiens GN=MADD PE=1 SV=2	1	8.3	33.9	38.9	MADD	1.14749	0.198485
Q06330	Recombining binding protein suppressor of hairless OS=Homo sapiens GN=RBPJ PE=1 SV=3	1	46.5	176.5	202.5	RBPJ	1.14731	0.198254
Q8NB90	Spermatogenesis-associated protein 5 OS=Homo sapiens GN=SPATA5 PE=1 SV=3	2	90.3	201.1	230.7	SPATA5	1.14719	0.198105
A0A0G2JH68	Protein diaphanous homolog 1 OS=Homo sapiens GN=DIAPH1 PE=1 SV=1	2	17.5	36.7	42.1		1.14714	0.19804
A0A024R098	Adenosine monophosphate deaminase 2 (Isoform L), isoform CRA_c OS=Homo sapiens GN=AMPD2 PE=4 SV=1	2	55.3	98.6	113.1	AMPD2	1.14706	0.197939
G5E975	SWI/SNF related, matrix associated, actin dependent regulator of chromatin, subfamily b, member 1, isoform CRA_c OS=Homo sapiens GN=SMARCB1 PE=1 SV=1	1	69.7	98.6	113.1	SMARCB1	1.14706	0.197939
Q53R19	Arp2/3 complex 34 kDa subunit OS=Homo sapiens GN=ARPC2 PE=2 SV=1	2	500.2	770.1	883.2	ARPC2	1.14686	0.197694
H0UI63	Zinc finger, NFX1-type containing 1, isoform CRA_b OS=Homo sapiens GN=ZNFX1 PE=4 SV=1	2	23	42.3	48.5	ZNFX1	1.14657	0.197327
P49916	DNA ligase 3 OS=Homo sapiens GN=LIG3 PE=1 SV=2	1	44.6	71.7	82.2	LIG3	1.14644	0.197165
X6RLX0	ELKS/Rab6-interacting/CAST family member 1 OS=Homo sapiens GN=ERC1 PE=1 SV=1	2	96.5	106.8	122.4	ERC1	1.14607	0.196692
P08240	Signal recognition particle receptor subunit alpha OS=Homo sapiens GN=SRPRA PE=1 SV=2	2	33.4	55.8	63.9	SRPR; SRPRA	1.14516	0.195551
Q9H0L4	Cleavage stimulation factor subunit 2 tau variant OS=Homo sapiens GN=CSTF2T PE=1 SV=1	2	12.3	41.4	47.4	CSTF2T	1.14493	0.195256
Q9NWU2	Glucose-induced degradation protein 8 homolog OS=Homo sapiens GN=GID8 PE=1 SV=1	1	24.3	36.6	41.9	GID8	1.14481	0.195107
Q5T4S7	E3 ubiquitin-protein ligase UBR4 OS=Homo sapiens GN=UBR4 PE=1 SV=1	2	597.6	1903.7	2178.5	UBR4	1.14435	0.194529
Q8TDM6	Disks large homolog 5 OS=Homo sapiens GN=DLG5 PE=1 SV=4	2	192.2	673.4	770.6	DLG5	1.14434	0.194518
Q96FQ6	Protein S100-A16 OS=Homo sapiens GN=S100A16 PE=1 SV=1	2	49.3	86	98.4	S100A16	1.14419	0.194322
P61764	Syntaxin-binding protein 1 OS=Homo sapiens GN=STXBP1 PE=1 SV=1	2	74.9	315.4	360.8	STXBP1	1.14394	0.194017
H7BY36	RNA-binding protein EWS (Fragment) OS=Homo sapiens GN=EWSR1 PE=1 SV=1	2	42.8	56.3	64.4		1.14387	0.193926
tr	GFP GFP	2	20981.5	590.1	674.9		1.1437	0.193714
O14936	Peripheral plasma membrane protein CASK OS=Homo sapiens GN=CASK PE=1 SV=3	2	8.5	50.8	58.1	CASK	1.1437	0.19371
B9EKV4	Aldehyde dehydrogenase 9 family, member A1 OS=Homo sapiens GN=ALDH9A1 PE=2 SV=1	2	387.7	518.1	592.5	ALDH9A1	1.1436	0.193585
G3V0E4	Mitochondrial-processing peptidase subunit beta OS=Homo sapiens GN=PMPCB PE=1 SV=1	2	45.5	106.7	122	PMPCB	1.14339	0.193321
O60566	Mitotic checkpoint serine/threonine-protein kinase BUB1 beta OS=Homo sapiens GN=BUB1B PE=1 SV=3	2	11.5	11.2	12.8	BUB1B	1.14286	0.192645
A0A1W2PS05	Phosphatidylinositol 3-kinase catalytic subunit type 3 OS=Homo sapiens GN=PIK3C3 PE=1 SV=1	2	11.7	128.9	147.3		1.14275	0.192505
Q9BR76	Coronin-1B OS=Homo sapiens GN=CORO1B PE=1 SV=1	2	167.5	364.5	416.5	CORO1B	1.14266	0.192398
Q13363	C-terminal-binding protein 1 OS=Homo sapiens GN=CTBP1 PE=1 SV=2	2	112.7	126.9	145	CTBP1	1.14263	0.192361
A0A024R8Y0	Cell division cycle associated 1, isoform CRA_a OS=Homo sapiens GN=CDCA1 PE=4 SV=1	2	84.8	151.7	173.3	NUF2	1.14239	0.192051
A0A0S2Z5H0	Mitochondrial ribosomal protein S28 isoform 2 (Fragment) OS=Homo sapiens GN=MRPS28 PE=2 SV=1	2	15.4	130.8	149.4	MRPS28	1.1422	0.191818
A9UK01	Rho GTPase activating protein OS=Homo sapiens PE=2 SV=1	2	172.5	147.7	168.7	ARHGAP18	1.14218	0.19179
E9PRY8	Elongation factor 1-delta OS=Homo sapiens GN=EEF1D PE=1 SV=1	2	475.1	748.6	854.8		1.14186	0.191392
O75190	DnaJ homolog subfamily B member 6 OS=Homo sapiens GN=DNAJB6 PE=1 SV=2	2	209.3	725.9	828.7	DNAJB6	1.14162	0.191079
Q7Z6D5	KLHL5 protein (Fragment) OS=Homo sapiens GN=KLHL5 PE=2 SV=1	1	68	260.1	296.9	KLHL5	1.14148	0.190911
B0LPF3	Growth factor receptor-bound protein 2 OS=Homo sapiens GN=GRB2 PE=2 SV=1	2	115.3	226.9	259	GRB2	1.14147	0.190895
Q13057	Bifunctional coenzyme A synthase OS=Homo sapiens GN=COASY PE=1 SV=4	2	16.5	20.5	23.4	COASY	1.14146	0.190885
P16930	Fumarylacetoacetase OS=Homo sapiens GN=FAH PE=1 SV=2	2	18	49.5	56.5	FAH	1.14141	0.190822
Q9H269	Vacuolar protein sorting-associated protein 16 homolog OS=Homo sapiens GN=VPS16 PE=1 SV=2	1	10.3	26.2	29.9	VPS16	1.14122	0.190579
Q15075	Early endosome antigen 1 OS=Homo sapiens GN=EEA1 PE=1 SV=2	2	297.1	362.6	413.7	EEA1	1.14093	0.190206
B4E163	Serine/threonine-protein phosphatase OS=Homo sapiens PE=2 SV=1	2	142.5	133	151.7	PPP1CB	1.1406	0.189795
Q9NQ29	Putative RNA-binding protein Luc7-like 1 OS=Homo sapiens GN=LUC7L PE=1 SV=1	2	101.9	112.9	128.7	LUC7L	1.13995	0.188967
E7EVH7	Uncharacterized protein OS=Homo sapiens PE=4 SV=1	2	232.9	350.9	400		1.13993	0.18894
B3KMS0	Condensin complex subunit 1 OS=Homo sapiens PE=2 SV=1	2	52.3	85.8	97.8	NCAPD2	1.13986	0.188857
Q8N5D0	WD and tetratricopeptide repeats protein 1 OS=Homo sapiens GN=WDTC1 PE=1 SV=2	1	61.5	160.4	182.8	WDTC1	1.13965	0.188592
Q70EL1	Inactive ubiquitin carboxyl-terminal hydrolase 54 OS=Homo sapiens GN=USP54 PE=1 SV=4	1	25.8	70.3	80.1	USP54	1.1394	0.188278
O95714	E3 ubiquitin-protein ligase HERC2 OS=Homo sapiens GN=HERC2 PE=1 SV=2	2	218.7	862.4	982.2	HERC2	1.13891	0.18766
V9HW00	Epididymis secretory sperm binding protein Li 77p (Fragment) OS=Homo sapiens GN=HEL-S-77p PE=2 SV=1	2	126.1	429.2	488.8	CSNK1A1	1.13886	0.187594
A2RRC9	IQ motif containing GTPase activating protein 3 OS=Homo sapiens GN=IQGAP3 PE=1 SV=1	2	77.1	119.1	135.6	IQGAP3	1.13854	0.187184
A0A140VJX1	Testicular tissue protein Li 198 OS=Homo sapiens PE=2 SV=1	2	113.4	204.5	232.8	ACAT1	1.13839	0.18699
O15511	Actin-related protein 2/3 complex subunit 5 OS=Homo sapiens GN=ARPC5 PE=1 SV=3	2	81	133.3	151.7	ARPC5	1.13803	0.186544
Q27J81	Inverted formin-2 OS=Homo sapiens GN=INF2 PE=1 SV=2	2	69.8	140.6	160	INF2	1.13798	0.186475
B7Z8Z6	DNA helicase OS=Homo sapiens PE=2 SV=1	2	70.5	75.4	85.8	MCM2	1.13793	0.186413
V9HW62	Lactoylglutathione lyase OS=Homo sapiens GN=HEL-S-74 PE=2 SV=1	2	186.7	278.6	317	GLO1	1.13783	0.186288
A5PLN9	Trafficking protein particle complex subunit 13 OS=Homo sapiens GN=TRAPPC13 PE=1 SV=2	1	21.1	27.7	31.5	C5orf44; TRAPPC13	1.13718	0.185466
Q9Y4X5	E3 ubiquitin-protein ligase ARIH1 OS=Homo sapiens GN=ARIH1 PE=1 SV=2	2	92.4	171.9	195.4	ARIH1	1.13671	0.184861
A0A140VKA0	Caldesmon 1, isoform CRA_i OS=Homo sapiens GN=CALD1 PE=2 SV=1	2	873	687.3	781.2	CALD1	1.13662	0.184752
B4DR48	Arginyl-tRNA--protein transferase 1 OS=Homo sapiens PE=2 SV=1	2	60.1	100.3	114	ATE1	1.13659	0.184712
O14646	Chromodomain-helicase-DNA-binding protein 1 OS=Homo sapiens GN=CHD1 PE=1 SV=2	1	63.5	109.1	124	CHD1	1.13657	0.184689
F8WA39	Myotubularin-related protein 1 OS=Homo sapiens GN=MTMR1 PE=1 SV=1	2	16	29.3	33.3	MTMR1	1.13652	0.184622
P35527	Keratin, type I cytoskeletal 9 OS=Homo sapiens GN=KRT9 PE=1 SV=3	2	1913	4479.4	5089.7	KRT9	1.13625	0.184275
A0A024R0Q0	Uncharacterized protein OS=Homo sapiens GN=FLJ12886 PE=4 SV=1	2	13.5	25	28.4	SMG9	1.136	0.183963
P48047	ATP synthase subunit O, mitochondrial OS=Homo sapiens GN=ATP5O PE=1 SV=1	2	6.1	22.8	25.9	ATP5O	1.13596	0.183918
A0A0C4DGB5	Calpastatin OS=Homo sapiens GN=CAST PE=1 SV=1	2	87.7	101.5	115.3	CAST	1.13596	0.183913
B3KXY9	cDNA FLJ46359 fis, clone TESTI4049786, highly similar to Hexokinase-1 (EC 2.7.1.1) OS=Homo sapiens PE=2 SV=1	2	356.5	537.1	609.5	HK1	1.1348	0.182435
B4DR61	Protein transport protein Sec61 subunit alpha isoform 1 OS=Homo sapiens GN=SEC61A1 PE=1 SV=1	2	73.9	193.7	219.8	SEC61A1	1.13474	0.182367
A0A024R7E3	DNA (cytosine-5)-methyltransferase OS=Homo sapiens GN=DNMT1 PE=3 SV=1	2	197.7	132.9	150.8	DNMT1	1.13469	0.182295
Q15124	Phosphoglucomutase-like protein 5 OS=Homo sapiens GN=PGM5 PE=1 SV=2	2	87	119.1	135.1	PGM5	1.13434	0.181854
Q13144	Translation initiation factor eIF-2B subunit epsilon OS=Homo sapiens GN=EIF2B5 PE=1 SV=3	2	31.3	83	94.1	EIF2B5	1.13373	0.181083
A0A024RDG9	3-hydroxybutyrate dehydrogenase, type 2, isoform CRA_b OS=Homo sapiens GN=BDH2 PE=4 SV=1	2	20.6	99.5	112.8	BDH2	1.13367	0.180999
Q8WWY3	U4/U6 small nuclear ribonucleoprotein Prp31 OS=Homo sapiens GN=PRPF31 PE=1 SV=2	2	15.3	40.5	45.9	PRPF31	1.13333	0.180572
Q5U0I6	H.sapiens ras-related Hrab1A protein OS=Homo sapiens GN=RAB1A PE=2 SV=1	2	167.3	312.2	353.8	RAB1A	1.13325	0.180464
Q08J23	tRNA (cytosine(34)-C(5))-methyltransferase OS=Homo sapiens GN=NSUN2 PE=1 SV=2	2	95	359.3	407.1	NSUN2	1.13304	0.180194
P00558	Phosphoglycerate kinase 1 OS=Homo sapiens GN=PGK1 PE=1 SV=3	2	723.5	1013.2	1147.9	PGK1	1.13295	0.180078
E9KL35	Epididymis tissue sperm binding protein Li 3a OS=Homo sapiens PE=1 SV=1	2	437.3	840.2	951.9	GNB2L1; RACK1	1.13294	0.180077
Q13217	DnaJ homolog subfamily C member 3 OS=Homo sapiens GN=DNAJC3 PE=1 SV=1	2	29.3	54.2	61.4	DNAJC3	1.13284	0.179946
Q96GC5	39S ribosomal protein L48, mitochondrial OS=Homo sapiens GN=MRPL48 PE=1 SV=2	2	19.8	90.5	102.5	MRPL48	1.1326	0.179634
Q9NR12	PDZ and LIM domain protein 7 OS=Homo sapiens GN=PDLIM7 PE=1 SV=1	2	400.4	576.2	652.6	PDLIM7	1.13259	0.179629
Q96JC1	Vam6/Vps39-like protein OS=Homo sapiens GN=VPS39 PE=1 SV=2	2	41.3	80.7	91.4	VPS39	1.13259	0.179625
A2J1N7	Rheumatoid factor RF-ET10 (Fragment) OS=Homo sapiens PE=2 SV=1	2	47.1	52.8	59.8		1.13258	0.179608
Q59EP1	Annexin (Fragment) OS=Homo sapiens PE=2 SV=1	2	9.2	13.6	15.4	ANXA11	1.13235	0.179324
B7ZLW8	5-methyltetrahydrofolate-homocysteine methyltransferase OS=Homo sapiens GN=MTR PE=2 SV=1	2	152.5	114.8	129.9	MTR	1.13153	0.178279
A8K5S3	cDNA FLJ78449 OS=Homo sapiens PE=2 SV=1	2	40.9	55.5	62.8	IST1	1.13153	0.178277
O95372	Acyl-protein thioesterase 2 OS=Homo sapiens GN=LYPLA2 PE=1 SV=1	2	25.1	35	39.6	LYPLA2	1.13143	0.178146
A0A1W2PNV4	Uncharacterized protein OS=Homo sapiens PE=4 SV=1	2	335.7	427.7	483.9		1.1314	0.17811
V9HW09	Epididymis secretory sperm binding protein Li 91n OS=Homo sapiens GN=HEL-S-91n PE=2 SV=1	2	100.9	239.2	270.6	PSMD8	1.13127	0.177944
O75821	Eukaryotic translation initiation factor 3 subunit G OS=Homo sapiens GN=EIF3G PE=1 SV=2	2	79.5	310	350.4	EIF3G	1.13032	0.176735
Q15785	Mitochondrial import receptor subunit TOM34 OS=Homo sapiens GN=TOMM34 PE=1 SV=2	2	96.6	313.6	354.4	TOMM34	1.1301	0.176453
Q59FC3	G protein-coupled receptor kinase interactor 1 variant (Fragment) OS=Homo sapiens PE=2 SV=1	2	54.4	127	143.5	GIT1	1.12992	0.176222
Q9P253	Vacuolar protein sorting-associated protein 18 homolog OS=Homo sapiens GN=VPS18 PE=1 SV=2	2	152.3	592.4	669.3	VPS18	1.12981	0.176081
Q59EF6	Calpain 2, large [catalytic] subunit variant (Fragment) OS=Homo sapiens PE=2 SV=1	2	665.8	1164.5	1315.2	CAPN2	1.12941	0.175572
Q96L92	Sorting nexin-27 OS=Homo sapiens GN=SNX27 PE=1 SV=2	2	17.1	31.7	35.8	SNX27	1.12934	0.175477
P82673	28S ribosomal protein S35, mitochondrial OS=Homo sapiens GN=MRPS35 PE=1 SV=1	2	45.8	245.9	277.7	MRPS35	1.12932	0.175455
Q9P2L0	WD repeat-containing protein 35 OS=Homo sapiens GN=WDR35 PE=1 SV=3	1	75.2	173.6	196	WDR35	1.12903	0.175087
P62979	Ubiquitin-40S ribosomal protein S27a OS=Homo sapiens GN=RPS27A PE=1 SV=2	2	1462.3	3545.8	4003.3	RPS27A	1.12903	0.175079
P49327	Fatty acid synthase OS=Homo sapiens GN=FASN PE=1 SV=3	2	2491.3	1978.2	2233	FASN	1.1288	0.174795
P53611	Geranylgeranyl transferase type-2 subunit beta OS=Homo sapiens GN=RABGGTB PE=1 SV=2	1	109.6	146.9	165.8	RABGGTB	1.12866	0.17461
A8KAQ3	Sortilin OS=Homo sapiens PE=2 SV=1	2	99.5	241.5	272.5	SORT1	1.12836	0.174233
Q709C8	Vacuolar protein sorting-associated protein 13C OS=Homo sapiens GN=VPS13C PE=1 SV=1	2	211.5	397.6	448.6	VPS13C	1.12827	0.174112
P41226	Ubiquitin-like modifier-activating enzyme 7 OS=Homo sapiens GN=UBA7 PE=1 SV=2	2	18.2	35.1	39.6	UBA7	1.12821	0.174029
Q9H6S0	Probable ATP-dependent RNA helicase YTHDC2 OS=Homo sapiens GN=YTHDC2 PE=1 SV=2	2	285.2	815.7	920.1	YTHDC2	1.12799	0.173752
O00483	Cytochrome c oxidase subunit NDUFA4 OS=Homo sapiens GN=NDUFA4 PE=1 SV=1	2	138.5	629.9	710.5	NDUFA4	1.12796	0.173712
P18084	Integrin beta-5 OS=Homo sapiens GN=ITGB5 PE=1 SV=1	2	40.4	68	76.7	ITGB5	1.12794	0.173692
P30040	Endoplasmic reticulum resident protein 29 OS=Homo sapiens GN=ERP29 PE=1 SV=4	2	182.7	230.7	260.2	ERP29	1.12787	0.173603
Q7Z4V5	Hepatoma-derived growth factor-related protein 2 OS=Homo sapiens GN=HDGFL2 PE=1 SV=1	2	155.2	247.9	279.5	HDGFRP2; HDGFL2	1.12747	0.17309
Q15323	Keratin, type I cuticular Ha1 OS=Homo sapiens GN=KRT31 PE=1 SV=3	1	2740.3	205.1	231.2	KRT31	1.12725	0.172814
Q96Q45	Transmembrane protein 237 OS=Homo sapiens GN=TMEM237 PE=1 SV=2	1	37.1	103	116.1	TMEM237	1.12718	0.172724
Q8IY21	Probable ATP-dependent RNA helicase DDX60 OS=Homo sapiens GN=DDX60 PE=1 SV=3	1	6.4	40.1	45.2	DDX60	1.12718	0.172721
B2R7P8	cDNA, FLJ93545, highly similar to Homo sapiens 5-aminoimidazole-4-carboxamide ribonucleotide formyltransferase/IMP cyclohydrolase (ATIC), mRNA OS=Homo sapiens PE=2 SV=1	2	117.2	195.6	220.4	ATIC	1.12679	0.172218
P0C2W1	F-box/SPRY domain-containing protein 1 OS=Homo sapiens GN=FBXO45 PE=1 SV=1	1	40.4	67.1	75.6	FBXO45	1.12668	0.172073
O95782	AP-2 complex subunit alpha-1 OS=Homo sapiens GN=AP2A1 PE=1 SV=3	2	472.1	872.6	983.1	AP2A1	1.12663	0.172018
Q92552	28S ribosomal protein S27, mitochondrial OS=Homo sapiens GN=MRPS27 PE=1 SV=3	2	166	601.9	678	MRPS27	1.12643	0.171761
Q3V6T2	Girdin OS=Homo sapiens GN=CCDC88A PE=1 SV=2	2	258	544.4	613.1	CCDC88A	1.12619	0.171455
A0A140VJM0	Testicular tissue protein Li 96 OS=Homo sapiens PE=2 SV=1	2	297.4	507.1	571	ITGA3	1.12601	0.17122
Q86W92	Liprin-beta-1 OS=Homo sapiens GN=PPFIBP1 PE=1 SV=2	2	78.8	181.8	204.7	PPFIBP1	1.12596	0.171159
A0A0G2JK23	Large proline-rich protein BAG6 OS=Homo sapiens GN=BAG6 PE=1 SV=1	2	92.3	591.1	665.5	BAG6	1.12587	0.171036
D3DUP1	WNK lysine deficient protein kinase 1, isoform CRA_b OS=Homo sapiens GN=WNK1 PE=4 SV=1	2	38	102.8	115.7	WNK1	1.12549	0.170549
Q7L576	Cytoplasmic FMR1-interacting protein 1 OS=Homo sapiens GN=CYFIP1 PE=1 SV=1	2	412.9	603.7	679.4	CYFIP1	1.12539	0.170429
O75964	ATP synthase subunit g, mitochondrial OS=Homo sapiens GN=ATP5L PE=1 SV=3	2	18.4	35.1	39.5	ATP5L	1.12536	0.170382
Q7Z4X2	Neuronal protein OS=Homo sapiens PE=2 SV=1	1	16.2	63.3	71.2	NDUFB11	1.1248	0.169672
A0A024R1U4	RAB5C, member RAS oncogene family, isoform CRA_a OS=Homo sapiens GN=RAB5C PE=4 SV=1	2	32.5	36.9	41.5	RAB5C	1.12466	0.169491
F8WCF6	Actin-related protein 2/3 complex subunit 4 OS=Homo sapiens GN=ARPC4-TTLL3 PE=3 SV=1	2	128.7	136.7	153.7		1.12436	0.169104
B3KMV5	cDNA FLJ12728 fis, clone NT2RP2000040, highly similar to Protein FAM62A OS=Homo sapiens PE=2 SV=1	2	292.6	389.5	437.9	ESYT1	1.12426	0.168978
A0A024R355	Three prime histone mRNA exonuclease 1, isoform CRA_b OS=Homo sapiens GN=THEX1 PE=4 SV=1	1	32.5	75.7	85.1	ERI1	1.12417	0.168866
Q59ES3	Amino acid transporter (Fragment) OS=Homo sapiens PE=2 SV=1	2	17.4	28.2	31.7	SLC1A5	1.12411	0.168788
A4QPB0	IQ motif containing GTPase activating protein 1 OS=Homo sapiens GN=IQGAP1 PE=1 SV=1	2	2066.6	2525.7	2838	IQGAP1	1.12365	0.168191
H3BQK9	Microtubule-actin cross-linking factor 1, isoforms 1/2/3/5 OS=Homo sapiens GN=MACF1 PE=1 SV=1	2	602	1160.9	1303.9		1.12318	0.16759
A0A024R0H2	Mitochondrial ribosomal protein S12, isoform CRA_a OS=Homo sapiens GN=MRPS12 PE=3 SV=1	1	73.1	432.7	486	MRPS12	1.12318	0.167589
P12004	Proliferating cell nuclear antigen OS=Homo sapiens GN=PCNA PE=1 SV=1	2	357.1	592.2	665.1	PCNA	1.1231	0.167487
P26639	Threonine--tRNA ligase, cytoplasmic OS=Homo sapiens GN=TARS PE=1 SV=3	2	535.7	606.1	680.6	TARS	1.12292	0.167251
A0A024R845	RAB14, member RAS oncogene family, isoform CRA_a OS=Homo sapiens GN=RAB14 PE=4 SV=1	2	48.3	70.8	79.5	RAB14	1.12288	0.167206
P09874	Poly [ADP-ribose] polymerase 1 OS=Homo sapiens GN=PARP1 PE=1 SV=4	2	834.9	2866.2	3218.2	PARP1	1.12281	0.167115
Q5HYL6	Uncharacterized protein DKFZp686E1899 OS=Homo sapiens GN=DKFZp686E1899 PE=2 SV=1	2	69.8	158.5	177.9	TMOD3	1.1224	0.166584
A0A0S2Z4R4	Hepatocyte growth factor-regulated tyrosine kinase substrate isoform 1 (Fragment) OS=Homo sapiens GN=HGS PE=2 SV=1	2	152.9	247.1	277.3	HGS	1.12222	0.166353
Q6AZZ1	E3 ubiquitin-protein ligase TRIM68 OS=Homo sapiens GN=TRIM68 PE=1 SV=1	1	12	44.2	49.6	TRIM68	1.12217	0.166294
Q15046	Lysine--tRNA ligase OS=Homo sapiens GN=KARS PE=1 SV=3	2	466.8	773.2	867.5	KARS	1.12196	0.166022
Q9Y4F3	Meiosis regulator and mRNA stability factor 1 OS=Homo sapiens GN=MARF1 PE=1 SV=6	1	71.4	69.8	78.3	KIAA0430; MARF1	1.12178	0.165785
Q53F62	ADP-ribosylation factor GTPase activating protein 1 isoform a variant (Fragment) OS=Homo sapiens PE=2 SV=1	2	48.6	150.6	168.9	ARFGAP1	1.12151	0.165448
V9HWK0	Signal recognition particle subunit SRP72 OS=Homo sapiens GN=HEL103 PE=2 SV=1	2	292.4	912.8	1023.7	SRP72	1.12149	0.165422
M0QZR4	Rho guanine nucleotide exchange factor 1 OS=Homo sapiens GN=ARHGEF1 PE=1 SV=1	2	49.8	74.1	83.1		1.12146	0.165375
A0A024RAD5	Dolichyl-diphosphooligosaccharide--protein glycosyltransferase 48 kDa subunit OS=Homo sapiens GN=DDOST PE=3 SV=1	2	63.8	121.1	135.8	DDOST	1.12139	0.165285
Q9H967	WD repeat-containing protein 76 OS=Homo sapiens GN=WDR76 PE=1 SV=2	1	22.1	33	37	WDR76	1.12121	0.165059
Q96EY7	Pentatricopeptide repeat domain-containing protein 3, mitochondrial OS=Homo sapiens GN=PTCD3 PE=1 SV=3	2	173.6	1371.7	1537.8	PTCD3	1.12109	0.164903
P62136	Serine/threonine-protein phosphatase PP1-alpha catalytic subunit OS=Homo sapiens GN=PPP1CA PE=1 SV=1	2	315.1	675.5	757.2	PPP1CA	1.12095	0.164719
A0A024QZS4	Peptidyl-prolyl cis-trans isomerase OS=Homo sapiens GN=PPIF PE=3 SV=1	2	166.9	292.5	327.8	PPIF	1.12068	0.164379
Q03001	Dystonin OS=Homo sapiens GN=DST PE=1 SV=4	2	81.2	178.2	199.7	DST	1.12065	0.164337
A0A024QZ30	Succinate dehydrogenase [ubiquinone] flavoprotein subunit, mitochondrial OS=Homo sapiens GN=SDHA PE=3 SV=1	2	307.9	429.5	481.3	SDHA	1.12061	0.164278
P55060	Exportin-2 OS=Homo sapiens GN=CSE1L PE=1 SV=3	2	420.3	638.8	715.7	CSE1L	1.12038	0.163991
A0A024QZW7	Nucleoporin 153kDa, isoform CRA_a OS=Homo sapiens GN=NUP153 PE=4 SV=1	1	19.1	45.7	51.2	NUP153	1.12035	0.16395
O75937	DnaJ homolog subfamily C member 8 OS=Homo sapiens GN=DNAJC8 PE=1 SV=2	2	185.2	174.5	195.5	DNAJC8	1.12034	0.163942
Q9UHC7	E3 ubiquitin-protein ligase makorin-1 OS=Homo sapiens GN=MKRN1 PE=1 SV=3	1	15	34.9	39.1	MKRN1	1.12034	0.163942
Q96SB8	Structural maintenance of chromosomes protein 6 OS=Homo sapiens GN=SMC6 PE=1 SV=2	2	91.7	127.5	142.8	SMC6	1.12	0.163499
B2RAM6	cDNA, FLJ95005, highly similar to Homo sapiens kinesin family member 11 (KIF11), mRNA OS=Homo sapiens PE=2 SV=1	2	22.8	39.2	43.9	KIF11	1.1199	0.163367
B2RD79	cDNA, FLJ96494, highly similar to Homo sapiens ubiquitin specific peptidase 14 (tRNA-guanine transglycosylase) (USP14), mRNA OS=Homo sapiens PE=2 SV=1	2	100.7	143.6	160.8	USP14	1.11978	0.163212
Q13137	Calcium-binding and coiled-coil domain-containing protein 2 OS=Homo sapiens GN=CALCOCO2 PE=1 SV=1	2	36.5	183.9	205.9	CALCOCO2	1.11963	0.163022
A0A0C4DGG9	Chromodomain-helicase-DNA-binding protein 4 OS=Homo sapiens GN=CHD4 PE=1 SV=1	2	178.5	441.7	494.4	CHD4	1.11931	0.162612
Q14694	Ubiquitin carboxyl-terminal hydrolase 10 OS=Homo sapiens GN=USP10 PE=1 SV=2	2	190.7	496.7	555.8	USP10	1.11899	0.162191
B4DM27	cDNA FLJ54637, highly similar to Homo sapiens BAT2 domain containing 1 (BAT2D1), mRNA (Fragment) OS=Homo sapiens PE=2 SV=1	2	94.8	105.9	118.5	PRRC2C	1.11898	0.162184
P21359	Neurofibromin OS=Homo sapiens GN=NF1 PE=1 SV=2	1	30.4	44.6	49.9	NF1	1.11883	0.161996
A0A0A0MS14	Immunoglobulin heavy variable 1-45 OS=Homo sapiens GN=IGHV1-45 PE=3 SV=1	2	508.6	625.2	699.4	IGHV1-45	1.11868	0.1618
A0A024R333	Transmembrane protein 113, isoform CRA_a OS=Homo sapiens GN=TMEM113 PE=4 SV=1	2	113.5	265	296.2	WDR82	1.11774	0.160579
Q8IW35	Centrosomal protein of 97 kDa OS=Homo sapiens GN=CEP97 PE=1 SV=1	1	70.5	319	356.5	CEP97	1.11755	0.160346
Q6IBS0	Twinfilin-2 OS=Homo sapiens GN=TWF2 PE=1 SV=2	2	299.7	333.5	372.7	TWF2	1.11754	0.160328
P51398	28S ribosomal protein S29, mitochondrial OS=Homo sapiens GN=DAP3 PE=1 SV=1	2	136	773.8	864.7	DAP3	1.11747	0.160239
Q8NBJ5	Procollagen galactosyltransferase 1 OS=Homo sapiens GN=COLGALT1 PE=1 SV=1	2	70.5	143.1	159.9	COLGALT1; GLT25D1	1.1174	0.160146
O43776	Asparagine--tRNA ligase, cytoplasmic OS=Homo sapiens GN=NARS PE=1 SV=1	2	450	577.8	645.5	NARS	1.11717	0.159847
A0A087WVQ6	Clathrin heavy chain OS=Homo sapiens GN=CLTC PE=1 SV=1	2	3911.2	6350.7	7094.1	CLTC	1.11706	0.159704
A5YKK6	CCR4-NOT transcription complex subunit 1 OS=Homo sapiens GN=CNOT1 PE=1 SV=2	2	269.4	446.7	498.9	CNOT1	1.11686	0.159444
A0A1U9X9A1	VARS OS=Homo sapiens PE=3 SV=2	2	511.4	602.6	673		1.11683	0.159406
A8K4T8	Condensin complex subunit 2 OS=Homo sapiens PE=2 SV=1	2	110.1	187.3	209.1	NCAPH	1.11639	0.158842
D9HTE9	Plasma membrane citrate carrier OS=Homo sapiens GN=SLC25A1 PE=2 SV=1	2	34	116.1	129.6	SLC25A1	1.11628	0.158698
Q14008	Cytoskeleton-associated protein 5 OS=Homo sapiens GN=CKAP5 PE=1 SV=3	2	389.6	1018.8	1137.2	CKAP5	1.11622	0.158615
A0A024QZR3	Protein pelota homolog OS=Homo sapiens GN=hCG_2002731 PE=3 SV=1	2	127.2	414.2	462.3	PELO	1.11613	0.158502
Q7LBR1	Charged multivesicular body protein 1b OS=Homo sapiens GN=CHMP1B PE=1 SV=1	2	38.1	53.4	59.6	CHMP1B	1.1161	0.158473
Q59EG8	Proteasome 26S non-ATPase subunit 2 variant (Fragment) OS=Homo sapiens PE=2 SV=1	2	716.9	1466.9	1637.1	PSMD2	1.11603	0.158372
P11177	Pyruvate dehydrogenase E1 component subunit beta, mitochondrial OS=Homo sapiens GN=PDHB PE=1 SV=3	2	87.4	159.6	178.1	PDHB	1.11591	0.158227
Q5VZU9	Tripeptidyl-peptidase 2 OS=Homo sapiens GN=TPP2 PE=1 SV=1	2	290.5	491.6	548.5	TPP2	1.11574	0.158007
B7ZLW0	LPP protein OS=Homo sapiens GN=LPP PE=2 SV=1	2	321	546.1	609.3	LPP	1.11573	0.157988
Q96Q42	Alsin OS=Homo sapiens GN=ALS2 PE=1 SV=2	1	37.8	51.9	57.9	ALS2	1.11561	0.157829
Q9H7E2	Tudor domain-containing protein 3 OS=Homo sapiens GN=TDRD3 PE=1 SV=1	2	60.1	110.1	122.8	TDRD3	1.11535	0.157496
P51812	Ribosomal protein S6 kinase alpha-3 OS=Homo sapiens GN=RPS6KA3 PE=1 SV=1	2	58.5	73.9	82.4	RPS6KA3	1.11502	0.15707
Q15738	Sterol-4-alpha-carboxylate 3-dehydrogenase, decarboxylating OS=Homo sapiens GN=NSDHL PE=1 SV=2	2	54.6	72.2	80.5	NSDHL	1.11496	0.15699
P35606	Coatomer subunit beta' OS=Homo sapiens GN=COPB2 PE=1 SV=2	2	1015.1	1749.6	1950.7	COPB2	1.11494	0.156967
Q8N3C0	Activating signal cointegrator 1 complex subunit 3 OS=Homo sapiens GN=ASCC3 PE=1 SV=3	2	574.1	3776.6	4209.7	ASCC3	1.11468	0.156629
Q9BYC9	39S ribosomal protein L20, mitochondrial OS=Homo sapiens GN=MRPL20 PE=1 SV=1	1	52	68.2	76	MRPL20	1.11437	0.156228
A0A140VJW5	Testicular tissue protein Li 192 OS=Homo sapiens PE=2 SV=1	2	561.3	859.4	957.5	DARS	1.11415	0.155943
H3BVG0	Nuclear pore complex protein Nup93 OS=Homo sapiens GN=NUP93 PE=1 SV=1	2	8.2	11.4	12.7		1.11404	0.155795
A8K1U0	cDNA FLJ75601, highly similar to Homo sapiens neighbor of BRCA1 gene 1 (NBR1), transcript variant 1, mRNA OS=Homo sapiens PE=2 SV=1	2	59.9	100.1	111.5	NBR1	1.11389	0.155602
Q5U043	S-(hydroxymethyl)glutathione dehydrogenase OS=Homo sapiens PE=2 SV=1	2	152.5	197.9	220.4	ADH5	1.11369	0.155353
V9HW04	Serine/threonine-protein phosphatase OS=Homo sapiens GN=HEL-S-80p PE=2 SV=1	2	46.6	146.6	163.2	PPP1CB	1.11323	0.154756
E7EQZ4	Survival motor neuron protein OS=Homo sapiens GN=SMN1 PE=1 SV=1	2	26.2	118.7	132.1	SMN1; SMN2	1.11289	0.154311
Q9NVR2	Integrator complex subunit 10 OS=Homo sapiens GN=INTS10 PE=1 SV=2	1	29.5	44.4	49.4	INTS10	1.11261	0.153951
P20073	Annexin A7 OS=Homo sapiens GN=ANXA7 PE=1 SV=3	2	385.3	411.4	457.7	ANXA7	1.11254	0.15386
Q08379	Golgin subfamily A member 2 OS=Homo sapiens GN=GOLGA2 PE=1 SV=3	1	210.1	250	278.1	GOLGA2	1.1124	0.153676
P53985	Monocarboxylate transporter 1 OS=Homo sapiens GN=SLC16A1 PE=1 SV=3	2	26.4	54.6	60.7	SLC16A1	1.11172	0.152796
P49588	Alanine--tRNA ligase, cytoplasmic OS=Homo sapiens GN=AARS PE=1 SV=2	2	198.7	222.9	247.7	AARS	1.11126	0.152197
Q5BKZ1	DBIRD complex subunit ZNF326 OS=Homo sapiens GN=ZNF326 PE=1 SV=2	2	26.4	57.9	64.3	ZNF326	1.11054	0.151255
Q8N7G1	Purine nucleoside phosphorylase OS=Homo sapiens PE=2 SV=1	2	366	238.5	264.8	PNP	1.11027	0.150914
H7BY58	Protein-L-isoaspartate O-methyltransferase OS=Homo sapiens GN=PCMT1 PE=1 SV=1	2	400.5	514.2	570.9	PCMT1	1.11027	0.150908
A0A087WZV0	Inositol hexakisphosphate and diphosphoinositol-pentakisphosphate kinase 2 OS=Homo sapiens GN=PPIP5K2 PE=1 SV=1	2	74	211.8	235.1	PPIP5K2	1.11001	0.150572
Q5JSZ5	Protein PRRC2B OS=Homo sapiens GN=PRRC2B PE=1 SV=2	2	15.2	39.1	43.4	PRRC2B	1.10997	0.150526
Q53EL1	Protein KIAA0196 variant (Fragment) OS=Homo sapiens PE=2 SV=1	2	64.7	148.5	164.8	KIAA0196; WASHC5	1.10976	0.150253
P20042	Eukaryotic translation initiation factor 2 subunit 2 OS=Homo sapiens GN=EIF2S2 PE=1 SV=2	2	140.1	371.7	412.4	EIF2S2	1.1095	0.149906
Q9NZJ4	Sacsin OS=Homo sapiens GN=SACS PE=1 SV=2	2	25.7	42.1	46.7	SACS	1.10926	0.149602
P10809	60 kDa heat shock protein, mitochondrial OS=Homo sapiens GN=HSPD1 PE=1 SV=2	2	488.4	842.1	934	HSPD1	1.10913	0.149431
O60508	Pre-mRNA-processing factor 17 OS=Homo sapiens GN=CDC40 PE=1 SV=1	1	54	91.8	101.8	CDC40	1.10893	0.149172
A0A1W2PPZ5	Transcription elongation factor A protein 1 OS=Homo sapiens GN=TCEA1 PE=1 SV=1	2	58.5	82.7	91.7		1.10883	0.149034
P63151	Serine/threonine-protein phosphatase 2A 55 kDa regulatory subunit B alpha isoform OS=Homo sapiens GN=PPP2R2A PE=1 SV=1	2	232.2	539	597.5	PPP2R2A	1.10853	0.148653
Q4KMP7	TBC1 domain family member 10B OS=Homo sapiens GN=TBC1D10B PE=1 SV=3	2	14	33.2	36.8	TBC1D10B	1.10843	0.148523
Q9BZE1	39S ribosomal protein L37, mitochondrial OS=Homo sapiens GN=MRPL37 PE=1 SV=2	2	52.4	194.2	215.2	MRPL37	1.10814	0.148135
Q9ULJ7	Ankyrin repeat domain-containing protein 50 OS=Homo sapiens GN=ANKRD50 PE=1 SV=4	2	58.1	173.4	192	ANKRD50	1.10727	0.147002
O60524	Nuclear export mediator factor NEMF OS=Homo sapiens GN=NEMF PE=1 SV=4	2	151.7	426.4	472	NEMF	1.10694	0.146579
A0A024R2W3	Protein kinase cAMP-dependent regulatory type II alpha isoform 2 OS=Homo sapiens GN=PRKAR2A PE=2 SV=1	2	137.4	291	322.1	PRKAR2A	1.10687	0.14649
A0A024RAM0	Transportin 1, isoform CRA_a OS=Homo sapiens GN=TNPO1 PE=4 SV=1	2	244.1	548.4	607	TNPO1	1.10686	0.146468
Q8WVJ2	NudC domain-containing protein 2 OS=Homo sapiens GN=NUDCD2 PE=1 SV=1	2	6.8	28.1	31.1	NUDCD2	1.10676	0.146344
P78356	Phosphatidylinositol 5-phosphate 4-kinase type-2 beta OS=Homo sapiens GN=PIP4K2B PE=1 SV=1	2	11.8	28.1	31.1	PIP4K2B	1.10676	0.146344
O94985	Calsyntenin-1 OS=Homo sapiens GN=CLSTN1 PE=1 SV=1	2	36.6	43.1	47.7	CLSTN1	1.10673	0.146301
D3DQ70	SERPINE1 mRNA binding protein 1, isoform CRA_d OS=Homo sapiens GN=SERBP1 PE=4 SV=1	2	527.8	2866.1	3171.8	SERBP1	1.10666	0.146213
P00338	L-lactate dehydrogenase A chain OS=Homo sapiens GN=LDHA PE=1 SV=2	2	2198.1	2179.7	2411.4	LDHA	1.1063	0.145741
A0A0A0MS52	Calcium/calmodulin-dependent protein kinase (CaM kinase) II gamma, isoform CRA_a OS=Homo sapiens GN=CAMK2G PE=1 SV=1	1	332.4	655.9	725.6	CAMK2G	1.10627	0.145699
Q59EK3	Adaptor-related protein complex 1, mu 1 subunit variant (Fragment) OS=Homo sapiens PE=2 SV=1	2	101.3	131.1	145	AP1M1	1.10603	0.145385
Q8NE71	ATP-binding cassette sub-family F member 1 OS=Homo sapiens GN=ABCF1 PE=1 SV=2	2	204	788.2	871.6	ABCF1	1.10581	0.145104
P61956	Small ubiquitin-related modifier 2 OS=Homo sapiens GN=SUMO2 PE=1 SV=3	1	78.1	157.9	174.6	SUMO2	1.10576	0.145042
H0YMV8	40S ribosomal protein S27 OS=Homo sapiens GN=RPS27L PE=1 SV=1	2	173.1	976.9	1079.9		1.10544	0.144615
O75153	Clustered mitochondria protein homolog OS=Homo sapiens GN=CLUH PE=1 SV=2	2	38.8	45.9	50.7	CLUH; KIAA0664	1.10458	0.143492
B4DLN1	cDNA FLJ60124, highly similar to Mitochondrial dicarboxylate carrier OS=Homo sapiens PE=2 SV=1	2	65.4	372.9	411.6		1.10378	0.142454
V9HW22	Epididymis luminal protein 33 OS=Homo sapiens GN=HEL-S-72p PE=2 SV=1	2	2302.3	31207	34442.3	HSPA8	1.10367	0.142312
P11047	Laminin subunit gamma-1 OS=Homo sapiens GN=LAMC1 PE=1 SV=3	2	33.1	57	62.9	LAMC1	1.10351	0.142098
G5E9G6	E3 ubiquitin-protein ligase TRIP12 OS=Homo sapiens GN=TRIP12 PE=1 SV=1	2	22.7	29	32	TRIP12	1.10345	0.142019
Q9NRV9	Heme-binding protein 1 OS=Homo sapiens GN=HEBP1 PE=1 SV=1	2	49.6	80.3	88.6	HEBP1	1.10336	0.141907
Q5CZB5	Uncharacterized protein DKFZp686M0430 OS=Homo sapiens GN=DKFZp686M0430 PE=2 SV=1	2	15.3	68.7	75.8	AKAP12	1.10335	0.141888
A0A068F7M9	FH1/FH2 domain-containing protein 1 variant OS=Homo sapiens GN=FHOD1 PE=2 SV=1	2	72.4	109.4	120.7	FHOD1	1.10329	0.141813
A0A0A1HAW1	H.sapiens ras-related Hrab2 protein OS=Homo sapiens PE=2 SV=1	2	61.4	85.4	94.2	RAB2A	1.10304	0.141491
Q9Y6E3	HSPC027 OS=Homo sapiens PE=2 SV=1	2	94.6	172.8	190.6	PSMD13	1.10301	0.141445
Q9NTJ3	Structural maintenance of chromosomes protein 4 OS=Homo sapiens GN=SMC4 PE=1 SV=2	2	238.8	410.8	453.1	SMC4	1.10297	0.141393
Q8IY26	Phospholipid phosphatase 6 OS=Homo sapiens GN=PLPP6 PE=1 SV=3	1	29.6	65.1	71.8	PPAPDC2; PLPP6	1.10292	0.141326
Q7Z478	ATP-dependent RNA helicase DHX29 OS=Homo sapiens GN=DHX29 PE=1 SV=2	2	247	672.6	741.7	DHX29	1.10274	0.141087
H0Y4Z8	Chromosome 9 open reading frame 86, isoform CRA_b OS=Homo sapiens GN=RABL6 PE=1 SV=2	2	30.2	92	101.4	RABL6	1.10217	0.140352
Q96EL2	28S ribosomal protein S24, mitochondrial OS=Homo sapiens GN=MRPS24 PE=1 SV=1	2	55.2	673.3	742	MRPS24	1.10203	0.14017
I1E4Y6	GRB10-interacting GYF protein 2 OS=Homo sapiens GN=GIGYF2 PE=1 SV=1	2	10.3	17.7	19.5		1.10169	0.139725
A8KA19	cDNA FLJ75831, highly similar to Homo sapiens exportin, tRNA (nuclear export receptor for tRNAs) (XPOT), mRNA OS=Homo sapiens PE=2 SV=1	2	104.2	165.5	182.3	XPOT	1.10151	0.139483
B2R679	cDNA, FLJ92825, highly similar to Homo sapiens SAR1a gene homolog 1 (S. cerevisiae) (SARA1), mRNA OS=Homo sapiens PE=2 SV=1	2	74.7	168.6	185.7	SAR1A	1.10142	0.139369
Q9Y5B9	FACT complex subunit SPT16 OS=Homo sapiens GN=SUPT16H PE=1 SV=1	2	396.4	787.9	867.8	SUPT16H	1.10141	0.13935
Q9Y4L1	Hypoxia up-regulated protein 1 OS=Homo sapiens GN=HYOU1 PE=1 SV=1	2	93.5	193.4	213	HYOU1	1.10134	0.139266
D6RBW1	Eukaryotic translation initiation factor 4E OS=Homo sapiens GN=EIF4E PE=1 SV=1	2	88.3	157.9	173.9	EIF4E	1.10133	0.139247
B7Z6M0	Peptidylprolyl isomerase OS=Homo sapiens PE=2 SV=1	2	195.7	750.1	826.1	FKBP8	1.10132	0.139233
A0A024R101	Spermatogenesis associated, serine-rich 2, isoform CRA_a OS=Homo sapiens GN=SPATS2 PE=4 SV=1	2	88.7	622.9	686	SPATS2	1.1013	0.139208
Q6P158	Putative ATP-dependent RNA helicase DHX57 OS=Homo sapiens GN=DHX57 PE=1 SV=2	2	312.2	335.7	369.7	DHX57	1.10128	0.139183
P84098	60S ribosomal protein L19 OS=Homo sapiens GN=RPL19 PE=1 SV=1	2	300.1	2110	2323.7	RPL19	1.10128	0.139181
D3DNI2	Profilin (Fragment) OS=Homo sapiens GN=PFN2 PE=3 SV=1	2	129.3	191.3	210.6	PFN2	1.10089	0.138669
Q92665	28S ribosomal protein S31, mitochondrial OS=Homo sapiens GN=MRPS31 PE=1 SV=3	2	52.5	329.2	362.4	MRPS31	1.10085	0.138619
A0A1U9X8I7	SKIV2L OS=Homo sapiens PE=4 SV=1	2	62.4	77.8	85.6	SKIV2L	1.10026	0.137841
O15347	High mobility group protein B3 OS=Homo sapiens GN=HMGB3 PE=1 SV=4	2	115.8	167.6	184.4	HMGB3	1.10024	0.137817
A0A024R1T2	Keratin, hair, acidic, 5, isoform CRA_a OS=Homo sapiens GN=KRTHA5 PE=3 SV=1	2	336.8	3	3.3	KRT35	1.1	0.137504
J9JIE6	Calcium load-activated calcium channel OS=Homo sapiens GN=TMCO1 PE=1 SV=1	2	27.6	49	53.9	TMCO1	1.1	0.137504
B2RAH5	cDNA, FLJ94919, highly similar to Homo sapiens protein phosphatase 1, regulatory (inhibitor) subunit 12A (PPP1R12A), mRNA OS=Homo sapiens PE=2 SV=1	2	306.4	595.3	654.8	PPP1R12A	1.09995	0.137437
A8K2U2	cDNA FLJ75392, highly similar to Homo sapiens hexokinase II (HKII) mRNA OS=Homo sapiens PE=2 SV=1	2	52.7	83.2	91.5	HK2	1.09976	0.137188
Q14232	Translation initiation factor eIF-2B subunit alpha OS=Homo sapiens GN=EIF2B1 PE=1 SV=1	2	22.8	30.1	33.1	EIF2B1	1.09967	0.137068
P26641	Elongation factor 1-gamma OS=Homo sapiens GN=EEF1G PE=1 SV=3	2	1293.8	1772.2	1948.8	EEF1G	1.09965	0.137045
P31153	S-adenosylmethionine synthase isoform type-2 OS=Homo sapiens GN=MAT2A PE=1 SV=1	2	570.3	487.3	535.8	MAT2A	1.09953	0.136884
Q96RS6	NudC domain-containing protein 1 OS=Homo sapiens GN=NUDCD1 PE=1 SV=2	2	77.3	65.4	71.9	NUDCD1	1.09939	0.136701
A0A0A0MTN0	Cullin-2 OS=Homo sapiens GN=CUL2 PE=1 SV=1	2	357.8	556	611	CUL2	1.09892	0.136087
Q8N6H7	ADP-ribosylation factor GTPase-activating protein 2 OS=Homo sapiens GN=ARFGAP2 PE=1 SV=1	2	280.9	320.5	352	ARFGAP2	1.09828	0.135251
A0A087WSV8	Nucleobindin 2, isoform CRA_b OS=Homo sapiens GN=NUCB2 PE=1 SV=1	2	33.9	85.5	93.9	NUCB2	1.09825	0.135201
A0A0S2Z3W7	Nucleotide diphosphatase (Fragment) OS=Homo sapiens GN=ITPA PE=2 SV=1	2	97.3	144.8	159	ITPA	1.09807	0.134965
A0A0S2Z492	DNA helicase OS=Homo sapiens GN=MCM3 PE=2 SV=1	2	308.2	384.9	422.6	MCM3	1.09795	0.134809
Q9BX69	Caspase recruitment domain-containing protein 6 OS=Homo sapiens GN=CARD6 PE=1 SV=2	1	28.2	72.6	79.7	CARD6	1.0978	0.13461
Q9BRP1	Programmed cell death protein 2-like OS=Homo sapiens GN=PDCD2L PE=1 SV=1	1	102.8	122.8	134.8	PDCD2L	1.09772	0.13451
P13667	Protein disulfide-isomerase A4 OS=Homo sapiens GN=PDIA4 PE=1 SV=2	2	548.8	1879.4	2061.8	PDIA4	1.09705	0.133632
P28290	Sperm-specific antigen 2 OS=Homo sapiens GN=SSFA2 PE=1 SV=3	2	100	243.4	267	SSFA2	1.09696	0.133511
Q8TEW0	Partitioning defective 3 homolog OS=Homo sapiens GN=PARD3 PE=1 SV=2	2	53.4	106.3	116.6	PARD3	1.0969	0.133426
P30043	Flavin reductase (NADPH) OS=Homo sapiens GN=BLVRB PE=1 SV=3	2	30.9	46.6	51.1	BLVRB	1.09657	0.132993
Q96KB5	Lymphokine-activated killer T-cell-originated protein kinase OS=Homo sapiens GN=PBK PE=1 SV=3	1	24.2	36.3	39.8	PBK	1.09642	0.132799
Q9HD45	Transmembrane 9 superfamily member 3 OS=Homo sapiens GN=TM9SF3 PE=1 SV=2	2	16.2	35.3	38.7	TM9SF3	1.09632	0.132665
Q4VXZ2	Vacuolar protein sorting 52 (Yeast) OS=Homo sapiens GN=VPS52 PE=4 SV=1	1	8	41.7	45.7	VPS52	1.09592	0.132147
P34896	Serine hydroxymethyltransferase, cytosolic OS=Homo sapiens GN=SHMT1 PE=1 SV=1	2	58.2	39.7	43.5	SHMT1	1.09572	0.131876
B2RAY1	cDNA, FLJ95184, highly similar to Homo sapiens signal transducing adaptor molecule (SH3 domain and ITAM motif) 1 (STAM), mRNA OS=Homo sapiens PE=2 SV=1	2	55.8	81.5	89.3	STAM	1.09571	0.13186
A8K2W7	cDNA FLJ78119, highly similar to Homo sapiens G1 to S phase transition 1 (GSPT1), mRNA OS=Homo sapiens PE=2 SV=1	2	460.5	456.9	500.6	GSPT1	1.09564	0.13178
A0A0S2Z569	DAZ associated protein 1 isoform 1 (Fragment) OS=Homo sapiens GN=DAZAP1 PE=2 SV=1	1	38.6	104.7	114.7	DAZAP1	1.09551	0.131604
Q9BRZ2	E3 ubiquitin-protein ligase TRIM56 OS=Homo sapiens GN=TRIM56 PE=1 SV=3	2	150.2	506	554.3	TRIM56	1.09545	0.13153
A0A024RDT9	Fibronectin type III domain containing 3A, isoform CRA_d OS=Homo sapiens GN=FNDC3A PE=4 SV=1	1	25.4	53.5	58.6	FNDC3A	1.09533	0.131362
B5BU38	Annexin OS=Homo sapiens GN=ANXA1 PE=2 SV=1	2	291	362.3	396.8	ANXA1	1.09522	0.131227
Q9NYK5	39S ribosomal protein L39, mitochondrial OS=Homo sapiens GN=MRPL39 PE=1 SV=3	2	123.4	471	515.6	MRPL39	1.09469	0.130525
A0A0C4DFQ0	Myomegalin OS=Homo sapiens GN=PDE4DIP PE=1 SV=1	1	12.3	27.5	30.1	PDE4DIP; LOC101060291	1.09455	0.130332
Q549M8	CLE7 OS=Homo sapiens GN=C14orf166 PE=2 SV=1	2	412.4	831.6	910	C14orf166	1.09428	0.129977
A8K6X9	cDNA FLJ76427, highly similar to Homo sapiens SH2 domain binding protein 1 (tetratricopeptide repeat containing) (SH2BP1), mRNA OS=Homo sapiens PE=2 SV=1	2	36.4	116	126.9	CTR9	1.09397	0.129567
Q9H2U2	Inorganic pyrophosphatase 2, mitochondrial OS=Homo sapiens GN=PPA2 PE=1 SV=2	2	102.6	260	284.4	PPA2	1.09385	0.12941
B3KS98	Eukaryotic translation initiation factor 3 subunit H OS=Homo sapiens GN=EIF3S3 PE=1 SV=1	2	152.1	252.7	276.4	EIF3H	1.09379	0.129332
Q8N1G4	Leucine-rich repeat-containing protein 47 OS=Homo sapiens GN=LRRC47 PE=1 SV=1	2	18.7	41.6	45.5	LRRC47	1.09375	0.129283
Q99700	Ataxin-2 OS=Homo sapiens GN=ATXN2 PE=1 SV=2	2	426.9	991.1	1083.8	ATXN2	1.09353	0.128996
Q9GZS1	DNA-directed RNA polymerase I subunit RPA49 OS=Homo sapiens GN=POLR1E PE=1 SV=2	1	4	35.3	38.6	POLR1E	1.09348	0.128933
Q6FIG4	RAB1B protein OS=Homo sapiens GN=RAB1B PE=2 SV=1	2	92.8	172.7	188.8	RAB1B	1.09323	0.128591
O75396	Vesicle-trafficking protein SEC22b OS=Homo sapiens GN=SEC22B PE=1 SV=4	2	86.6	210.6	230.2	SEC22B	1.09307	0.128382
Q71RC2	La-related protein 4 OS=Homo sapiens GN=LARP4 PE=1 SV=3	2	80.8	156.9	171.5	LARP4	1.09305	0.128363
P04424	Argininosuccinate lyase OS=Homo sapiens GN=ASL PE=1 SV=4	2	37.4	40.9	44.7	ASL	1.09291	0.128174
Q8TD16	Protein bicaudal D homolog 2 OS=Homo sapiens GN=BICD2 PE=1 SV=1	1	6.3	115.2	125.9	BICD2	1.09288	0.128138
A8K4V4	cDNA FLJ76392, highly similar to Homo sapiens mitochondrial ribosomal protein L43 (MRPL43), transcript variant 1, mRNA OS=Homo sapiens PE=2 SV=1	2	10.8	54.2	59.2	MRPL43	1.09225	0.127304
Q9H3S7	Tyrosine-protein phosphatase non-receptor type 23 OS=Homo sapiens GN=PTPN23 PE=1 SV=1	2	125.5	169.2	184.8	PTPN23	1.0922	0.127235
Q9P0M9	39S ribosomal protein L27, mitochondrial OS=Homo sapiens GN=MRPL27 PE=1 SV=1	2	103.9	508.9	555.6	MRPL27	1.09177	0.126664
P11717	Cation-independent mannose-6-phosphate receptor OS=Homo sapiens GN=IGF2R PE=1 SV=3	2	36.5	99.2	108.3	IGF2R	1.09173	0.126621
A0A024R7I3	RAB8A, member RAS oncogene family, isoform CRA_a OS=Homo sapiens GN=RAB8A PE=4 SV=1	2	49.2	103.6	113.1	RAB8A	1.0917	0.126575
Q5T011	KICSTOR complex protein SZT2 OS=Homo sapiens GN=SZT2 PE=1 SV=3	2	21	26.2	28.6	SZT2	1.0916	0.126448
Q6P5V6	SNX5 protein (Fragment) OS=Homo sapiens GN=SNX5 PE=2 SV=1	2	38.6	178.1	194.4	SNX5	1.09152	0.126341
P17858	ATP-dependent 6-phosphofructokinase, liver type OS=Homo sapiens GN=PFKL PE=1 SV=6	2	238.2	556.7	607.6	PFKL	1.09143	0.126222
P25685	DnaJ homolog subfamily B member 1 OS=Homo sapiens GN=DNAJB1 PE=1 SV=4	2	192	930.6	1015.5	DNAJB1	1.09123	0.125957
A0A140VJF4	Biliverdin reductase A OS=Homo sapiens PE=2 SV=1	1	22.8	28.6	31.2	BLVRA	1.09091	0.125531
A0A024R7S3	Clathrin light chain OS=Homo sapiens GN=CLTB PE=3 SV=1	2	240.9	518.7	565.7	CLTB	1.09061	0.125137
Q69YJ7	Uncharacterized protein DKFZp667H197 (Fragment) OS=Homo sapiens GN=DKFZp667H197 PE=2 SV=1	2	245.8	259.6	283.1	RBM12	1.09052	0.125021
B2R8R5	cDNA, FLJ94025, highly similar to Homo sapiens tripartite motif-containing 28 (TRIM28), mRNA OS=Homo sapiens PE=2 SV=1	2	78.6	123.9	135.1	TRIM28	1.0904	0.124851
Q53F47	Down-regulator of transcription 1 variant (Fragment) OS=Homo sapiens PE=2 SV=1	1	30.8	57.6	62.8	DR1	1.09028	0.124696
A0A024RBH2	Cytoskeleton-associated protein 4, isoform CRA_c OS=Homo sapiens GN=CKAP4 PE=4 SV=1	2	59	163.5	178.2	CKAP4	1.08991	0.124207
Q8WWM7	Ataxin-2-like protein OS=Homo sapiens GN=ATXN2L PE=1 SV=2	2	122.5	213.3	232.4	ATXN2L	1.08955	0.123726
A0A024R7X0	ADP-ribosylation factor guanine nucleotide-exchange factor 1(Brefeldin A-inhibited), isoform CRA_a OS=Homo sapiens GN=ARFGEF1 PE=4 SV=1	2	60.7	128.6	140.1	ARFGEF1	1.08942	0.123566
Q53GG0	Epithelial protein lost in neoplasm beta variant (Fragment) OS=Homo sapiens PE=2 SV=1	2	67	127.9	139.3	LIMA1	1.08913	0.123179
Q92878	DNA repair protein RAD50 OS=Homo sapiens GN=RAD50 PE=1 SV=1	2	248.1	389.5	424.1	RAD50	1.08883	0.122781
P27635	60S ribosomal protein L10 OS=Homo sapiens GN=RPL10 PE=1 SV=4	2	590	4227.1	4601.5	RPL10	1.08857	0.122436
Q53EU7	N-myc downstream regulated gene 1 variant (Fragment) OS=Homo sapiens PE=2 SV=1	2	53	71.4	77.7	NDRG1	1.08824	0.121991
Q9C0C9	(E3-independent) E2 ubiquitin-conjugating enzyme OS=Homo sapiens GN=UBE2O PE=1 SV=3	2	165.3	1800	1958.6	UBE2O	1.08811	0.121826
V9GYM8	Rho guanine nucleotide exchange factor 2 OS=Homo sapiens GN=ARHGEF2 PE=1 SV=1	2	93.1	230.5	250.7		1.08764	0.121195
V9HWB4	Epididymis secretory sperm binding protein Li 89n OS=Homo sapiens GN=HEL-S-89n PE=2 SV=1	2	2762.9	4399.3	4784.3	HSPA5	1.08751	0.121034
Q9P2Q2	FERM domain-containing protein 4A OS=Homo sapiens GN=FRMD4A PE=1 SV=3	1	21.5	64	69.6	FRMD4A	1.0875	0.121015
A0A024R8D4	Mitochondrial ribosomal protein S2, isoform CRA_a OS=Homo sapiens GN=MRPS2 PE=3 SV=1	2	47	407.3	442.9	MRPS2	1.0874	0.120889
Q3MHD2	Protein LSM12 homolog OS=Homo sapiens GN=LSM12 PE=1 SV=2	2	256.3	492	534.9	LSM12; LSM12P1	1.0872	0.120611
Q9Y6A4	Cilia- and flagella-associated protein 20 OS=Homo sapiens GN=CFAP20 PE=1 SV=1	2	35.7	66.9	72.7	C16orf80; CFAP20	1.0867	0.119949
A0A024QZY1	JTV1 gene, isoform CRA_a OS=Homo sapiens GN=JTV1 PE=4 SV=1	2	155.9	231.4	251.4	AIMP2	1.08643	0.119596
O75794	Cell division cycle protein 123 homolog OS=Homo sapiens GN=CDC123 PE=1 SV=1	1	159	153	166.2	CDC123	1.08627	0.119389
E5KNL5	Mitochondrial endonuclease G OS=Homo sapiens PE=4 SV=1	1	19.3	82.5	89.6	ENDOG	1.08606	0.119105
Q13526	Peptidyl-prolyl cis-trans isomerase NIMA-interacting 1 OS=Homo sapiens GN=PIN1 PE=1 SV=1	2	26.7	68.7	74.6	PIN1	1.08588	0.118866
A4D2P0	Ras-related C3 botulinum toxin substrate 1 (Rho family, small GTP binding protein Rac1) OS=Homo sapiens GN=RAC1 PE=2 SV=1	2	203.5	325.1	353	RAC1	1.08582	0.118785
A0A140TA86	MICOS complex subunit MIC13 OS=Homo sapiens GN=C19orf70 PE=1 SV=1	2	64	133	144.4	C19orf70	1.08571	0.118644
P62330	ADP-ribosylation factor 6 OS=Homo sapiens GN=ARF6 PE=1 SV=2	2	39.9	80.6	87.5	ARF6	1.08561	0.118503
Q13546	Receptor-interacting serine/threonine-protein kinase 1 OS=Homo sapiens GN=RIPK1 PE=1 SV=3	1	134.3	181.1	196.6	RIPK1	1.08559	0.118477
P82675	28S ribosomal protein S5, mitochondrial OS=Homo sapiens GN=MRPS5 PE=1 SV=2	2	182.2	1294.1	1404.7	MRPS5	1.08546	0.118313
O94763	Unconventional prefoldin RPB5 interactor 1 OS=Homo sapiens GN=URI1 PE=1 SV=3	2	17.9	325.5	353.2	URI1	1.0851	0.117828
A0A1B4Z394	Tubulin gamma chain OS=Homo sapiens GN=TUBG2 PE=2 SV=1	2	36.1	68.3	74.1	TUBG2	1.08492	0.117588
G5E9E7	Tight junction protein 1 (Zona occludens 1), isoform CRA_e OS=Homo sapiens GN=TJP1 PE=1 SV=1	2	515.7	1671.8	1813.5	TJP1	1.08476	0.117374
Q12904	Aminoacyl tRNA synthase complex-interacting multifunctional protein 1 OS=Homo sapiens GN=AIMP1 PE=1 SV=2	2	286.8	488.6	530	AIMP1	1.08473	0.117338
J3KPS3	Fructose-bisphosphate aldolase OS=Homo sapiens GN=ALDOA PE=1 SV=1	2	708.7	950.3	1030.7	ALDOA	1.0846	0.11717
V9HWJ1	Glutathione synthetase OS=Homo sapiens GN=HEL-S-64p PE=2 SV=1	2	101.8	88.7	96.2	GSS	1.08455	0.117103
P36507	Dual specificity mitogen-activated protein kinase kinase 2 OS=Homo sapiens GN=MAP2K2 PE=1 SV=1	2	110.9	212.6	230.5	MAP2K2	1.0842	0.116625
O14777	Kinetochore protein NDC80 homolog OS=Homo sapiens GN=NDC80 PE=1 SV=1	1	80.4	157	170.2	NDC80	1.08408	0.116466
Q8TDD1	ATP-dependent RNA helicase DDX54 OS=Homo sapiens GN=DDX54 PE=1 SV=2	2	16.3	22.6	24.5	DDX54	1.08407	0.116459
P60228	Eukaryotic translation initiation factor 3 subunit E OS=Homo sapiens GN=EIF3E PE=1 SV=1	2	231.5	449.4	487.1	EIF3E	1.08389	0.116218
Q658Y4	Protein FAM91A1 OS=Homo sapiens GN=FAM91A1 PE=1 SV=3	2	84.1	200.3	217.1	FAM91A1	1.08387	0.116197
A8K5U9	cDNA FLJ75056, highly similar to Homo sapiens phosphatidylinositol binding clathrin assembly protein (PICALM), mRNA OS=Homo sapiens PE=2 SV=1	2	35.1	39.6	42.9	PICALM	1.08333	0.115477
P54886	Delta-1-pyrroline-5-carboxylate synthase OS=Homo sapiens GN=ALDH18A1 PE=1 SV=2	2	59.6	93.9	101.7	ALDH18A1	1.08307	0.115123
B4DPD5	Ubiquitin thioesterase OS=Homo sapiens PE=2 SV=1	2	18.5	57.8	62.6	OTUB1	1.08304	0.115093
Q6PJI9	GATOR complex protein WDR59 OS=Homo sapiens GN=WDR59 PE=1 SV=2	1	50.8	102.4	110.9	WDR59	1.08301	0.115044
P78385	Keratin, type II cuticular Hb3 OS=Homo sapiens GN=KRT83 PE=1 SV=2	1	2241	71.1	77	KRT83	1.08298	0.115009
Q86UK7	E3 ubiquitin-protein ligase ZNF598 OS=Homo sapiens GN=ZNF598 PE=1 SV=1	2	57.2	259.4	280.9	ZNF598	1.08288	0.114878
Q9NXR7	BRISC and BRCA1-A complex member 2 OS=Homo sapiens GN=BABAM2 PE=1 SV=2	1	9.4	25.5	27.6	BRE; BABAM2	1.08235	0.114171
Q9Y4W2	Ribosomal biogenesis protein LAS1L OS=Homo sapiens GN=LAS1L PE=1 SV=2	1	28.2	98.6	106.7	LAS1L	1.08215	0.113901
A0A0G2JIW1	Heat shock 70 kDa protein 1B OS=Homo sapiens GN=HSPA1B PE=1 SV=1	2	390.7	4583.1	4959.1		1.08204	0.113755
P17812	CTP synthase 1 OS=Homo sapiens GN=CTPS1 PE=1 SV=2	2	777.5	810.9	877.2	CTPS1	1.08176	0.113382
A8MYK1	39S ribosomal protein L23, mitochondrial OS=Homo sapiens GN=MRPL23 PE=1 SV=1	2	7.5	34.4	37.2	MRPL23; LOC107987373	1.0814	0.112894
P09496	Clathrin light chain A OS=Homo sapiens GN=CLTA PE=1 SV=1	1	377.5	981.3	1061.1	CLTA	1.08132	0.112794
Q8TD26	Chromodomain-helicase-DNA-binding protein 6 OS=Homo sapiens GN=CHD6 PE=1 SV=4	1	50.1	61.8	66.8	CHD6	1.08091	0.112241
A0A024R6D1	NIMA (Never in mitosis gene a)-related kinase 9, isoform CRA_a OS=Homo sapiens GN=NEK9 PE=4 SV=1	2	260.1	791.4	855.3	NEK9	1.08074	0.112023
P62750	60S ribosomal protein L23a OS=Homo sapiens GN=RPL23A PE=1 SV=1	2	795.7	2956.4	3193	RPL23A	1.08003	0.111071
O95881	Thioredoxin domain-containing protein 12 OS=Homo sapiens GN=TXNDC12 PE=1 SV=1	1	96.3	142.7	154.1	TXNDC12	1.07989	0.110882
F8VQZ7	Methionine aminopeptidase 2 OS=Homo sapiens GN=METAP2 PE=1 SV=1	2	126	397.2	428.9	METAP2	1.07981	0.110776
A0A090CXP3	MHC class I antigen OS=Homo sapiens GN=HLA-A PE=3 SV=1	2	125.8	178.1	192.3	HLA-A	1.07973	0.110671
A8K5A4	cDNA FLJ76826, highly similar to Homo sapiens ceruloplasmin (ferroxidase) (CP), mRNA OS=Homo sapiens PE=2 SV=1	2	284.6	277.7	299.7	CP	1.07922	0.109992
Q16531	DNA damage-binding protein 1 OS=Homo sapiens GN=DDB1 PE=1 SV=1	2	564.7	3200.7	3453.8	DDB1	1.07908	0.109797
A0A140VJY2	Testicular tissue protein Li 209 OS=Homo sapiens PE=2 SV=1	2	52.8	112.9	121.8	TRAP1	1.07883	0.109469
Q5STK2	Prefoldin subunit 6, isoform CRA_b OS=Homo sapiens GN=PFDN6 PE=2 SV=1	2	115.7	908.9	980.5	PFDN6	1.07878	0.109396
A8K0T9	cDNA FLJ75422, highly similar to Homo sapiens capping protein (actin filament) muscle Z-line, alpha 1, mRNA OS=Homo sapiens PE=2 SV=1	2	267.8	433.3	467.3	CAPZA1	1.07847	0.108983
P08779	Keratin, type I cytoskeletal 16 OS=Homo sapiens GN=KRT16 PE=1 SV=4	2	166.5	295.7	318.9	KRT16	1.07846	0.10897
E9PI68	Signal peptidase complex subunit 2 OS=Homo sapiens GN=SPCS2 PE=1 SV=1	2	202	394.4	425.3		1.07835	0.108821
Q96IF1	LIM domain-containing protein ajuba OS=Homo sapiens GN=AJUBA PE=1 SV=1	1	36.4	39.6	42.7	AJUBA	1.07828	0.108736
A0A087WZN1	Isocitrate dehydrogenase [NAD] subunit, mitochondrial OS=Homo sapiens GN=IDH3B PE=1 SV=1	1	22.5	47.3	51	IDH3B	1.07822	0.108657
P54727	UV excision repair protein RAD23 homolog B OS=Homo sapiens GN=RAD23B PE=1 SV=1	2	189.3	484.3	522.1	RAD23B	1.07805	0.108425
E9LUH4	Methyl-CpG-binding protein 2 OS=Homo sapiens GN=MECP2 PE=2 SV=1	1	39.6	51.4	55.4	MECP2	1.07782	0.108118
Q7RU04	Aminopeptidase B OS=Homo sapiens GN=RNPEP PE=4 SV=1	2	76.7	99.2	106.9	RNPEP	1.07762	0.10785
A0A024R324	Ras homolog gene family, member A, isoform CRA_a OS=Homo sapiens GN=RHOA PE=3 SV=1	2	133.5	208.8	225	RHOA	1.07759	0.107803
Q9UHB9	Signal recognition particle subunit SRP68 OS=Homo sapiens GN=SRP68 PE=1 SV=2	2	78	220.5	237.6	SRP68	1.07755	0.107756
Q13618	Cullin-3 OS=Homo sapiens GN=CUL3 PE=1 SV=2	2	643.8	1237.2	1333	CUL3	1.07743	0.107598
Q96AY3	Peptidyl-prolyl cis-trans isomerase FKBP10 OS=Homo sapiens GN=FKBP10 PE=1 SV=1	2	145.2	295.1	317.9	FKBP10	1.07726	0.107369
O60331	Phosphatidylinositol 4-phosphate 5-kinase type-1 gamma OS=Homo sapiens GN=PIP5K1C PE=1 SV=2	1	68.6	72.7	78.3	PIP5K1C	1.07703	0.107057
Q12959	Disks large homolog 1 OS=Homo sapiens GN=DLG1 PE=1 SV=2	2	58.3	115.9	124.8	DLG1	1.07679	0.106737
A0A024R8U1	Solute carrier family 16 (Monocarboxylic acid transporters), member 3, isoform CRA_a OS=Homo sapiens GN=SLC16A3 PE=4 SV=1	1	246.7	674.6	726.4	SLC16A3	1.07679	0.106732
P37235	Hippocalcin-like protein 1 OS=Homo sapiens GN=HPCAL1 PE=1 SV=3	2	58.3	191.9	206.6	HPCAL1	1.0766	0.106486
B7Z4T6	Nuclear factor 1 OS=Homo sapiens PE=2 SV=1	2	64	99.7	107.3	NFIC	1.07623	0.105985
B1AKJ5	Nardilysin OS=Homo sapiens GN=NRDC PE=1 SV=1	2	86.5	95.9	103.2	NRD1; NRDC	1.07612	0.10584
Q15042	Rab3 GTPase-activating protein catalytic subunit OS=Homo sapiens GN=RAB3GAP1 PE=1 SV=3	2	60.2	109.1	117.4	RAB3GAP1	1.07608	0.105781
A0A024R4I7	Leucine zipper and CTNNBIP1 domain containing, isoform CRA_a OS=Homo sapiens GN=LZIC PE=4 SV=1	2	50.1	99.9	107.5	LZIC	1.07608	0.10578
A0A140VKA6	Testis secretory sperm-binding protein Li 233m OS=Homo sapiens PE=2 SV=1	2	85.7	1324.2	1424.8	ST13	1.07597	0.105638
O00764	Pyridoxal kinase OS=Homo sapiens GN=PDXK PE=1 SV=1	2	125.8	155.6	167.4	PDXK	1.07584	0.105457
O75521	Enoyl-CoA delta isomerase 2, mitochondrial OS=Homo sapiens GN=ECI2 PE=1 SV=4	2	39.5	77.8	83.7	ECI2	1.07584	0.105457
A0A024R8S5	Protein disulfide-isomerase OS=Homo sapiens GN=P4HB PE=2 SV=1	2	505.7	1116	1200.6	P4HB	1.07581	0.105419
Q16630	Cleavage and polyadenylation specificity factor subunit 6 OS=Homo sapiens GN=CPSF6 PE=1 SV=2	2	214.5	394.5	424.4	CPSF6	1.07579	0.105399
D6R956	Ubiquitin carboxyl-terminal hydrolase OS=Homo sapiens GN=UCHL1 PE=1 SV=1	2	318.1	501.3	539		1.0752	0.104611
P62277	40S ribosomal protein S13 OS=Homo sapiens GN=RPS13 PE=1 SV=2	2	365.1	1238	1330.9	RPS13	1.07504	0.104391
F8VYN9	ADP-ribosylation factor-like protein 1 OS=Homo sapiens GN=ARL1 PE=1 SV=1	2	3.6	16	17.2		1.075	0.104337
Q59G75	Isoleucyl-tRNA synthetase, cytoplasmic variant (Fragment) OS=Homo sapiens PE=2 SV=1	2	1357	2292.8	2464.5	IARS	1.07489	0.104184
P28799	Granulins OS=Homo sapiens GN=GRN PE=1 SV=2	2	106.1	305.8	328.7	GRN	1.07489	0.104183
P35221	Catenin alpha-1 OS=Homo sapiens GN=CTNNA1 PE=1 SV=1	2	89.9	92.2	99.1	CTNNA1	1.07484	0.104118
A0A0A0MTC1	E3 ubiquitin-protein ligase RNF213 OS=Homo sapiens GN=RNF213 PE=1 SV=1	2	63.3	171.1	183.9	RNF213	1.07481	0.104082
A0A024R1X8	Junction plakoglobin, isoform CRA_a OS=Homo sapiens GN=JUP PE=4 SV=1	2	414.1	373.4	401.3	JUP	1.07472	0.103959
A0A024R0C7	CTTNBP2 N-terminal like, isoform CRA_b OS=Homo sapiens GN=CTTNBP2NL PE=4 SV=1	1	17.2	48.5	52.1	CTTNBP2NL	1.07423	0.103299
P49915	GMP synthase [glutamine-hydrolyzing] OS=Homo sapiens GN=GMPS PE=1 SV=1	2	359.1	399.3	428.9	GMPS	1.07413	0.103168
Q9UNE7	E3 ubiquitin-protein ligase CHIP OS=Homo sapiens GN=STUB1 PE=1 SV=2	2	62	587.1	630.5	STUB1	1.07392	0.10289
Q6ZUX3	TOG array regulator of axonemal microtubules protein 2 OS=Homo sapiens GN=TOGARAM2 PE=2 SV=2	1	271.8	274.7	295	FAM179A; TOGARAM2	1.0739	0.102858
Q6DD88	Atlastin-3 OS=Homo sapiens GN=ATL3 PE=1 SV=1	2	10.2	9.5	10.2	ATL3	1.07368	0.10257
Q8IVB5	LIX1-like protein OS=Homo sapiens GN=LIX1L PE=2 SV=1	1	11.1	35.3	37.9	LIX1L; LOC101060547	1.07365	0.10253
Q9UH65	Switch-associated protein 70 OS=Homo sapiens GN=SWAP70 PE=1 SV=1	2	22.7	23.1	24.8	SWAP70	1.07359	0.102447
A0A0S2Z4R1	Tyrosine--tRNA ligase (Fragment) OS=Homo sapiens GN=YARS PE=2 SV=1	2	128.8	172.6	185.3	YARS	1.07358	0.10243
Q6DHV5	Protein CC2D2B OS=Homo sapiens GN=CC2D2B PE=2 SV=3	1	29.2	29.9	32.1	CC2D2B	1.07358	0.102428
Q53G35	Phosphoglycerate mutase (Fragment) OS=Homo sapiens PE=2 SV=1	2	533.2	814.3	874.2	PGAM1	1.07356	0.102403
A0A024R5V9	NMDA receptor regulated 2, isoform CRA_b OS=Homo sapiens GN=NARG2 PE=4 SV=1	1	22.4	51.8	55.6	NARG2; ICE2	1.07336	0.102133
P15559	NAD(P)H dehydrogenase [quinone] 1 OS=Homo sapiens GN=NQO1 PE=1 SV=1	2	286.8	407.4	437.2	NQO1	1.07315	0.101847
Q32Q12	Nucleoside diphosphate kinase OS=Homo sapiens GN=NME1-NME2 PE=1 SV=1	2	229.1	380.3	408.1	NME1-NME2	1.0731	0.101785
Q06210	Glutamine--fructose-6-phosphate aminotransferase [isomerizing] 1 OS=Homo sapiens GN=GFPT1 PE=1 SV=3	2	525.5	765.1	821	GFPT1	1.07306	0.101734
P08253	72 kDa type IV collagenase OS=Homo sapiens GN=MMP2 PE=1 SV=2	2	647.6	5031.8	5399.3	MMP2	1.07304	0.101698
Q9Y295	Developmentally-regulated GTP-binding protein 1 OS=Homo sapiens GN=DRG1 PE=1 SV=1	2	61.5	159.1	170.7	DRG1	1.07291	0.101529
B7Z3U1	cDNA FLJ53798, highly similar to Long-chain fatty acid transport protein 1 (EC 6.2.1.-) OS=Homo sapiens PE=2 SV=1	1	14.5	15.2	16.3	SLC27A1	1.07237	0.100801
A0A024QZT2	Exocyst complex component 2, isoform CRA_a OS=Homo sapiens GN=EXOC2 PE=4 SV=1	2	96.4	200.5	215	EXOC2	1.07232	0.100734
E9KL30	Proteasome subunit beta type OS=Homo sapiens PE=2 SV=1	2	83.5	174.4	187	PSMB7	1.07225	0.100638
Q10567	AP-1 complex subunit beta-1 OS=Homo sapiens GN=AP1B1 PE=1 SV=2	2	95.5	140	150.1	AP1B1	1.07214	0.100497
P21281	V-type proton ATPase subunit B, brain isoform OS=Homo sapiens GN=ATP6V1B2 PE=1 SV=3	2	112.3	130.7	140.1	ATP6V1B2	1.07192	0.100198
O14929	Histone acetyltransferase type B catalytic subunit OS=Homo sapiens GN=HAT1 PE=1 SV=1	1	137	72.8	78	HAT1	1.07143	0.0995357
E9PBG7	Calcium/calmodulin-dependent protein kinase type II subunit delta OS=Homo sapiens GN=CAMK2D PE=1 SV=1	2	1015.5	1963.6	2103.7	CAMK2D	1.07135	0.0994279
P04843	Dolichyl-diphosphooligosaccharide--protein glycosyltransferase subunit 1 OS=Homo sapiens GN=RPN1 PE=1 SV=1	2	153.8	381.2	408.3	RPN1	1.07109	0.0990814
Q92615	La-related protein 4B OS=Homo sapiens GN=LARP4B PE=1 SV=3	2	86.2	265	283.8	LARP4B	1.07094	0.0988822
Q68DE3	Basic helix-loop-helix domain-containing protein USF3 OS=Homo sapiens GN=USF3 PE=1 SV=3	1	99.1	91.7	98.2	KIAA2018; USF3	1.07088	0.0988013
P23381	Tryptophan--tRNA ligase, cytoplasmic OS=Homo sapiens GN=WARS PE=1 SV=2	2	146.8	269.3	288.3	WARS	1.07055	0.0983566
O95155	Ubiquitin conjugation factor E4 B OS=Homo sapiens GN=UBE4B PE=1 SV=1	1	9.9	19.9	21.3	UBE4B	1.07035	0.098085
B2R4D5	Actin-related protein 2/3 complex subunit 3 OS=Homo sapiens PE=2 SV=1	2	54.7	91.1	97.5	ARPC3	1.07025	0.0979512
Q9BQS8	FYVE and coiled-coil domain-containing protein 1 OS=Homo sapiens GN=FYCO1 PE=1 SV=3	2	43	54.2	58	FYCO1	1.07011	0.09776
P51648	Fatty aldehyde dehydrogenase OS=Homo sapiens GN=ALDH3A2 PE=1 SV=1	2	34.3	61.7	66	ALDH3A2	1.06969	0.0971955
P61457	Pterin-4-alpha-carbinolamine dehydratase OS=Homo sapiens GN=PCBD1 PE=1 SV=2	2	153.9	231.2	247.3	PCBD1	1.06964	0.0971208
Q59GX2	Solute carrier family 2 (Facilitated glucose transporter), member 1 variant (Fragment) OS=Homo sapiens PE=2 SV=1	2	44.9	77.8	83.2	SLC2A1	1.06941	0.0968134
X6RAY8	39S ribosomal protein L4, mitochondrial OS=Homo sapiens GN=MRPL4 PE=1 SV=1	2	141.3	557.3	595.9	MRPL4	1.06926	0.0966161
P46060	Ran GTPase-activating protein 1 OS=Homo sapiens GN=RANGAP1 PE=1 SV=1	2	6.9	24.8	26.5	RANGAP1	1.06855	0.0956522
Q9NQX4	Unconventional myosin-Vc OS=Homo sapiens GN=MYO5C PE=1 SV=2	1	27.3	56.9	60.8	MYO5C	1.06854	0.0956427
O60925	Prefoldin subunit 1 OS=Homo sapiens GN=PFDN1 PE=1 SV=2	2	125.3	465.8	497.7	PFDN1	1.06848	0.0955657
P23921	Ribonucleoside-diphosphate reductase large subunit OS=Homo sapiens GN=RRM1 PE=1 SV=1	2	113.4	174.1	186	RRM1	1.06835	0.0953864
Q9NR50	Translation initiation factor eIF-2B subunit gamma OS=Homo sapiens GN=EIF2B3 PE=1 SV=1	2	164	414.5	442.8	EIF2B3	1.06828	0.0952831
Q92575	UBX domain-containing protein 4 OS=Homo sapiens GN=UBXN4 PE=1 SV=2	1	156.9	180.5	192.8	UBXN4	1.06814	0.0951062
A8K984	Structural maintenance of chromosomes protein OS=Homo sapiens PE=2 SV=1	2	303.8	537.1	573.6	SMC2	1.06796	0.0948543
A0A140VK07	Testicular secretory protein Li 7 OS=Homo sapiens PE=2 SV=1	2	497.4	646.1	690	DPYSL3	1.06795	0.0948389
B4DWA6	cDNA FLJ60094, highly similar to F-actin capping protein subunit beta OS=Homo sapiens PE=2 SV=1	2	745.2	1311.4	1400.3	CAPZB	1.06779	0.0946281
Q9Y3F4	Serine-threonine kinase receptor-associated protein OS=Homo sapiens GN=STRAP PE=1 SV=1	2	423.7	733.2	782.8	STRAP	1.06765	0.094437
P18031	Tyrosine-protein phosphatase non-receptor type 1 OS=Homo sapiens GN=PTPN1 PE=1 SV=1	2	70.6	67	71.5	PTPN1	1.06716	0.0937821
Q9H993	Protein-glutamate O-methyltransferase OS=Homo sapiens GN=ARMT1 PE=1 SV=1	2	18.9	16.4	17.5	C6orf211; ARMT1	1.06707	0.0936591
P80723	Brain acid soluble protein 1 OS=Homo sapiens GN=BASP1 PE=1 SV=2	2	194	431.4	460.3	BASP1	1.06699	0.0935483
Q59HH3	Trifunctional purine biosynthetic protein adenosine-3 (Fragment) OS=Homo sapiens PE=2 SV=1	2	653.3	594.7	634.5	GART	1.06692	0.0934581
P08243	Asparagine synthetase [glutamine-hydrolyzing] OS=Homo sapiens GN=ASNS PE=1 SV=4	1	484.1	579.1	617.8	ASNS	1.06683	0.0933274
P11279	Lysosome-associated membrane glycoprotein 1 OS=Homo sapiens GN=LAMP1 PE=1 SV=3	2	15.1	22.5	24	LAMP1	1.06667	0.0931094
Q9H788	SH2 domain-containing protein 4A OS=Homo sapiens GN=SH2D4A PE=1 SV=1	2	8.9	18	19.2	SH2D4A	1.06667	0.0931094
J3KQC6	Transmembrane protease serine 13 OS=Homo sapiens GN=TMPRSS13 PE=1 SV=1	2	149.7	132.5	141.3	TMPRSS13	1.06642	0.0927691
Q99959	Plakophilin-2 OS=Homo sapiens GN=PKP2 PE=1 SV=2	2	155.5	182.4	194.5	PKP2	1.06634	0.0926644
Q8NI36	WD repeat-containing protein 36 OS=Homo sapiens GN=WDR36 PE=1 SV=1	1	67.4	264.3	281.8	WDR36	1.06621	0.0924952
F8VVA7	Coatomer subunit zeta-1 OS=Homo sapiens GN=COPZ1 PE=1 SV=1	2	16	22.7	24.2		1.06608	0.0923147
P18085	ADP-ribosylation factor 4 OS=Homo sapiens GN=ARF4 PE=1 SV=3	2	559	788.6	840.6	ARF4	1.06594	0.0921257
A0A1U9X8Q1	TRIM26 OS=Homo sapiens PE=4 SV=1	2	54.7	333.3	355.2	TRIM26	1.06571	0.0918103
Q53H37	Calmodulin-like skin protein variant (Fragment) OS=Homo sapiens PE=2 SV=1	1	22.4	42.8	45.6	CALML5	1.06542	0.091423
P07814	Bifunctional glutamate/proline--tRNA ligase OS=Homo sapiens GN=EPRS PE=1 SV=5	2	1810.2	3102.6	3305	EPRS	1.06524	0.0911726
B3KXW5	cDNA FLJ46199 fis, clone TESTI4007965, highly similar to AP-1 complex subunit gamma-1 OS=Homo sapiens PE=2 SV=1	2	33.5	49.1	52.3	AP1G1	1.06517	0.0910879
A0A087WTW0	E3 ubiquitin-protein ligase UHRF1 OS=Homo sapiens GN=UHRF1 PE=1 SV=1	2	47.7	52.2	55.6		1.06513	0.0910351
A6NFX8	ADP-sugar pyrophosphatase OS=Homo sapiens GN=NUDT5 PE=1 SV=1	2	56.2	38.5	41		1.06494	0.0907655
B4DUP2	cDNA FLJ56155, highly similar to UTP--glucose-1-phosphate uridylyltransferase 2 (EC 2.7.7.9) OS=Homo sapiens PE=2 SV=1	2	589.1	506.4	539.2	UGP2	1.06477	0.0905431
O75147	Obscurin-like protein 1 OS=Homo sapiens GN=OBSL1 PE=1 SV=4	2	125.4	295.5	314.6	OBSL1	1.06464	0.0903605
F2Z2W7	tRNA (uracil-5-)-methyltransferase homolog A OS=Homo sapiens GN=TRMT2A PE=1 SV=1	1	16.4	29.4	31.3	TRMT2A	1.06463	0.0903465
Q9BTL3	RNMT-activating mini protein OS=Homo sapiens GN=FAM103A1 PE=1 SV=1	1	30.3	49.6	52.8	FAM103A1	1.06452	0.0901978
Q8NBF2	NHL repeat-containing protein 2 OS=Homo sapiens GN=NHLRC2 PE=1 SV=1	2	107.1	116.5	124	NHLRC2	1.06438	0.0900102
A0A024R8R4	Nuclear protein localization 4 homolog (S. cerevisiae), isoform CRA_a OS=Homo sapiens GN=NPLOC4 PE=4 SV=1	2	359.7	319.1	339.6	NPLOC4	1.06424	0.0898279
Q9NQC7	Ubiquitin carboxyl-terminal hydrolase CYLD OS=Homo sapiens GN=CYLD PE=1 SV=1	1	10	21.8	23.2	CYLD	1.06422	0.0897967
A0A024QYY9	Spectrin domain with coiled-coils 1, isoform CRA_a OS=Homo sapiens GN=SPECC1 PE=4 SV=1	2	36.1	101.3	107.8	SPECC1	1.06417	0.089723
P78362	SRSF protein kinase 2 OS=Homo sapiens GN=SRPK2 PE=1 SV=3	2	167.8	916.8	975.5	SRPK2	1.06403	0.0895348
O00233	26S proteasome non-ATPase regulatory subunit 9 OS=Homo sapiens GN=PSMD9 PE=1 SV=3	2	94.8	141.1	150.1	PSMD9	1.06378	0.089206
Q9Y266	Nuclear migration protein nudC OS=Homo sapiens GN=NUDC PE=1 SV=1	2	346.7	11896.4	12655	NUDC	1.06377	0.0891824
A8K727	Pleckstrin homology domain-containing family A member 2 OS=Homo sapiens GN=PLEKHA2 PE=1 SV=1	1	55.9	99	105.3	PLEKHA2	1.06364	0.089005
A0A024R7I5	tRNA (guanine(26)-N(2))-dimethyltransferase OS=Homo sapiens GN=TRMT1 PE=3 SV=1	2	23.9	45.8	48.7	TRMT1	1.06332	0.0885742
P00387	NADH-cytochrome b5 reductase 3 OS=Homo sapiens GN=CYB5R3 PE=1 SV=3	2	277.5	330.5	351.4	CYB5R3	1.06324	0.0884639
Q59FF0	EBNA-2 co-activator variant (Fragment) OS=Homo sapiens PE=2 SV=1	2	627.2	2839.8	3019.3	SND1	1.06321	0.0884248
O14602	Eukaryotic translation initiation factor 1A, Y-chromosomal OS=Homo sapiens GN=EIF1AY PE=1 SV=4	1	291	511.8	544.1	EIF1AY	1.06311	0.0882917
A0A024RC00	CTP synthase OS=Homo sapiens GN=CTPS2 PE=3 SV=1	1	28.9	52.3	55.6	CTPS2	1.0631	0.0882739
Q15654	Thyroid receptor-interacting protein 6 OS=Homo sapiens GN=TRIP6 PE=1 SV=3	2	190.5	398.2	423.2	TRIP6	1.06278	0.0878464
E9KL44	Epididymis tissue sperm binding protein Li 14m OS=Homo sapiens PE=2 SV=1	2	158.4	446	473.9	HADHA	1.06256	0.087539
Q8N556	Actin filament-associated protein 1 OS=Homo sapiens GN=AFAP1 PE=1 SV=2	2	20	61.3	65.1	AFAP1	1.06199	0.0867705
Q02978	Mitochondrial 2-oxoglutarate/malate carrier protein OS=Homo sapiens GN=SLC25A11 PE=1 SV=3	2	21	67.8	72	SLC25A11	1.06195	0.0867116
B4DZF2	cDNA FLJ59571, highly similar to Eukaryotic translation initiation factor 4gamma 2 OS=Homo sapiens PE=2 SV=1	2	191.4	295.7	314	EIF4G2	1.06189	0.0866303
A0A024R3W7	Eukaryotic translation elongation factor 1 beta 2, isoform CRA_a OS=Homo sapiens GN=EEF1B2 PE=3 SV=1	2	210.7	319.7	339.4	EEF1B2	1.06162	0.0862678
A0A1B0GW77	Alpha-aminoadipic semialdehyde dehydrogenase OS=Homo sapiens GN=ALDH7A1 PE=1 SV=1	2	198.7	242.5	257.4		1.06144	0.0860273
B4DI08	cDNA FLJ60091, highly similar to Hypoxia-inducible factor 1 alpha inhibitor(EC 1.14.11.16) OS=Homo sapiens PE=2 SV=1	1	54.9	133.7	141.9	HIF1AN	1.06133	0.0858751
Q9Y4G6	Talin-2 OS=Homo sapiens GN=TLN2 PE=1 SV=4	1	71.5	296.7	314.8	TLN2	1.061	0.0854306
Q9Y438	Uncharacterized protein DKFZp564A026 (Fragment) OS=Homo sapiens GN=DKFZp564A026 PE=2 SV=1	1	14.6	24.7	26.2	FAM171A1	1.06073	0.0850558
B2RCJ6	cDNA, FLJ96114, highly similar to Homo sapiens bromodomain and WD repeat domain containing 2 (BRWD2), mRNA OS=Homo sapiens PE=2 SV=1	2	235.8	418.5	443.9	WDR11	1.06069	0.0850071
Q9BSJ2	Gamma-tubulin complex component 2 OS=Homo sapiens GN=TUBGCP2 PE=1 SV=2	1	102.4	145.1	153.9	TUBGCP2	1.06065	0.0849457
P30622	CAP-Gly domain-containing linker protein 1 OS=Homo sapiens GN=CLIP1 PE=1 SV=2	2	72.2	161.8	171.6	CLIP1	1.06057	0.0848379
P57721	Poly(rC)-binding protein 3 OS=Homo sapiens GN=PCBP3 PE=2 SV=2	1	80.4	175.4	185.9	PCBP3	1.05986	0.083878
A8K9U1	cDNA FLJ76468, highly similar to Homo sapiens cullin 7 (CUL7), mRNA OS=Homo sapiens PE=2 SV=1	2	72.6	366.4	388.1	CUL7	1.05922	0.0830089
Q5T0G8	Annexin OS=Homo sapiens GN=ANXA11 PE=1 SV=1	2	300.5	519.1	549.7	ANXA11	1.05895	0.082632
Q96K76	Ubiquitin carboxyl-terminal hydrolase 47 OS=Homo sapiens GN=USP47 PE=1 SV=3	2	191.2	305.6	323.6	USP47	1.0589	0.0825671
Q8WUY3	Protein prune homolog 2 OS=Homo sapiens GN=PRUNE2 PE=1 SV=3	1	20.6	25.5	27	PRUNE2	1.05882	0.0824622
A0A024R6S1	DnaJ (Hsp40) homolog, subfamily A, member 2, isoform CRA_a OS=Homo sapiens GN=DNAJA2 PE=3 SV=1	2	245.3	5089.8	5389.1	DNAJA2	1.0588	0.0824354
Q5T5C7	Serine--tRNA ligase, cytoplasmic OS=Homo sapiens GN=SARS PE=1 SV=1	2	164.1	193.9	205.3	SARS	1.05879	0.0824208
A2A3R6	40S ribosomal protein S6 OS=Homo sapiens GN=RPS6 PE=2 SV=1	2	513.1	3954.8	4186.6	RPS6	1.05861	0.0821743
Q6XZF7	Dynamin-binding protein OS=Homo sapiens GN=DNMBP PE=1 SV=1	2	284.3	485.3	513.7	DNMBP	1.05852	0.0820492
Q9H7D7	WD repeat-containing protein 26 OS=Homo sapiens GN=WDR26 PE=1 SV=3	2	19.3	55	58.2	WDR26	1.05818	0.0815875
Q16222	UDP-N-acetylhexosamine pyrophosphorylase OS=Homo sapiens GN=UAP1 PE=1 SV=3	2	155.5	155.4	164.4	UAP1	1.05792	0.0812238
B4DMN1	cDNA FLJ61136, highly similar to Ras-related protein Rab-11A OS=Homo sapiens PE=2 SV=1	1	11.3	17.3	18.3	RAB11A	1.0578	0.0810716
Q3KQU3	MAP7 domain-containing protein 1 OS=Homo sapiens GN=MAP7D1 PE=1 SV=1	2	199.4	729.1	771.2	MAP7D1	1.05774	0.0809884
Q04864	Proto-oncogene c-Rel OS=Homo sapiens GN=REL PE=1 SV=1	1	105	95.3	100.8	REL	1.05771	0.0809475
Q16881	Thioredoxin reductase 1, cytoplasmic OS=Homo sapiens GN=TXNRD1 PE=1 SV=3	2	505	548.5	580.1	TXNRD1	1.05761	0.08081
Q01813	ATP-dependent 6-phosphofructokinase, platelet type OS=Homo sapiens GN=PFKP PE=1 SV=2	2	526	858.8	908.2	PFKP	1.05752	0.0806878
A8K6Q4	cDNA FLJ76888, highly similar to Homo sapiens RNA binding motif protein 6 (RBM6), mRNA OS=Homo sapiens PE=2 SV=1	1	53	181	191.4	RBM6	1.05746	0.0806011
Q9P1J8	PRO1289 OS=Homo sapiens PE=2 SV=1	1	11.6	12.2	12.9	UTP6	1.05738	0.0804899
Q9Y3B2	Exosome complex component CSL4 OS=Homo sapiens GN=EXOSC1 PE=1 SV=1	1	64.5	139.6	147.6	EXOSC1	1.05731	0.0803938
Q7Z3K3	Pogo transposable element with ZNF domain OS=Homo sapiens GN=POGZ PE=1 SV=2	1	14.2	29.9	31.6	POGZ	1.05686	0.0797791
P35579	Myosin-9 OS=Homo sapiens GN=MYH9 PE=1 SV=4	2	8315.2	14931.9	15777.2	MYH9	1.05661	0.0794434
Q9H2M9	Rab3 GTPase-activating protein non-catalytic subunit OS=Homo sapiens GN=RAB3GAP2 PE=1 SV=1	2	225.1	322.6	340.8	RAB3GAP2	1.05642	0.0791789
Q6NS36	Ferritin (Fragment) OS=Homo sapiens GN=FTH1 PE=2 SV=1	2	30.2	118.8	125.5	FTH1	1.0564	0.0791525
O75179	Ankyrin repeat domain-containing protein 17 OS=Homo sapiens GN=ANKRD17 PE=1 SV=3	2	159.6	544.4	575.1	ANKRD17	1.05639	0.0791458
A1L0S7	TNS1 protein (Fragment) OS=Homo sapiens GN=TNS1 PE=2 SV=2	1	27.2	39.2	41.4	TNS1	1.05612	0.0787771
Q8WW22	DnaJ homolog subfamily A member 4 OS=Homo sapiens GN=DNAJA4 PE=1 SV=1	1	32.3	171.3	180.9	DNAJA4	1.05604	0.0786673
Q9GZS3	WD repeat-containing protein 61 OS=Homo sapiens GN=WDR61 PE=1 SV=1	2	126.5	157.7	166.5	WDR61	1.0558	0.0783395
Q6MZT3	Uncharacterized protein DKFZp686C1054 OS=Homo sapiens GN=DKFZp686C1054 PE=2 SV=1	2	16.4	170.3	179.8	THUMPD1	1.05578	0.0783146
J3KNQ4	Alpha-parvin OS=Homo sapiens GN=PARVA PE=1 SV=1	2	99.3	160.2	169.1	PARVA	1.05556	0.0780025
A0A024R9Y6	Guanine nucleotide binding protein-like 3 (Nucleolar)-like, isoform CRA_a OS=Homo sapiens GN=GNL3L PE=4 SV=1	1	21.7	27	28.5	GNL3L	1.05556	0.0780025
P35611	Alpha-adducin OS=Homo sapiens GN=ADD1 PE=1 SV=2	2	144.9	255.7	269.7	ADD1	1.05475	0.0769034
A0A024QZG0	Ring finger protein 40, isoform CRA_a OS=Homo sapiens GN=RNF40 PE=4 SV=1	1	12.2	23.9	25.2	RNF40	1.05439	0.0764131
P50851	Lipopolysaccharide-responsive and beige-like anchor protein OS=Homo sapiens GN=LRBA PE=1 SV=4	2	56.4	127.1	134	LRBA	1.05429	0.076269
A0A024RDG1	Vesicle docking protein p115, isoform CRA_a OS=Homo sapiens GN=VDP PE=4 SV=1	2	186.9	245.3	258.6	USO1	1.05422	0.076175
Q9BVG8	Kinesin-like protein KIFC3 OS=Homo sapiens GN=KIFC3 PE=1 SV=4	2	29.6	110.7	116.7	KIFC3	1.0542	0.0761493
A0A024R1A3	Testicular secretory protein Li 63 OS=Homo sapiens GN=UBE1 PE=2 SV=1	2	534.8	758.7	799.7	UBA1	1.05404	0.0759294
Q9UI26	Importin-11 OS=Homo sapiens GN=IPO11 PE=1 SV=1	2	76.5	146.8	154.7	IPO11	1.05381	0.0756212
Q9Y388	RNA-binding motif protein, X-linked 2 OS=Homo sapiens GN=RBMX2 PE=1 SV=2	1	6.3	20.5	21.6	RBMX2	1.05366	0.0754074
Q5STZ8	ATP-binding cassette sub-family F member 1 (Fragment) OS=Homo sapiens GN=ABCF1 PE=1 SV=9	2	51.3	319.2	336.3		1.05357	0.0752881
P48735	Isocitrate dehydrogenase [NADP], mitochondrial OS=Homo sapiens GN=IDH2 PE=1 SV=2	2	105.4	134.8	142	IDH2	1.05341	0.0750704
F5GXV7	Neurobeachin OS=Homo sapiens GN=NBEA PE=1 SV=2	2	21.1	37.5	39.5		1.05333	0.0749621
O43819	Protein SCO2 homolog, mitochondrial OS=Homo sapiens GN=SCO2 PE=1 SV=3	2	21.8	36	37.9	SCO2	1.05278	0.0742009
F5H5P2	Uncharacterized protein OS=Homo sapiens PE=4 SV=1	2	51.5	87.2	91.8		1.05275	0.074166
Q86W42	THO complex subunit 6 homolog OS=Homo sapiens GN=THOC6 PE=1 SV=1	1	17.9	24.8	26.1	THOC6	1.05242	0.0737097
A8K3H8	cDNA FLJ77680, highly similar to Homo sapiens protein phosphatase 2 (formerly 2A), regulatory subunit A (PR 65), alpha isoform (PPP2R1A), mRNA OS=Homo sapiens PE=2 SV=1	2	310.6	690.7	726.9	PPP2R1A	1.05241	0.0736977
O00487	26S proteasome non-ATPase regulatory subunit 14 OS=Homo sapiens GN=PSMD14 PE=1 SV=1	2	108.7	297.1	312.6	PSMD14	1.05217	0.0733692
Q9Y4B5	Microtubule cross-linking factor 1 OS=Homo sapiens GN=MTCL1 PE=1 SV=5	1	175.1	654.2	688	SOGA2; MTCL1	1.05167	0.0726768
A0A024RDV9	Spastic paraplegia 20 isoform 1 OS=Homo sapiens GN=SPG20 PE=2 SV=1	2	67.7	112.6	118.4	SPG20; SPART	1.05151	0.0724623
A0A0A0MRI2	Sorting nexin OS=Homo sapiens GN=SNX6 PE=1 SV=1	2	33.1	73.9	77.7	SNX6	1.05142	0.0723402
A0A087WW66	26S proteasome non-ATPase regulatory subunit 1 OS=Homo sapiens GN=PSMD1 PE=1 SV=1	2	272.6	623.8	655.8		1.0513	0.0721723
Q9Y6Y8	SEC23-interacting protein OS=Homo sapiens GN=SEC23IP PE=1 SV=1	2	882.5	799.2	839.9	SEC23IP	1.05093	0.071661
Q15019	Septin-2 OS=Homo sapiens GN=SEPT2 PE=1 SV=1	2	331.7	526	552.7	SEPT2	1.05076	0.0714338
Q9UHV9	Prefoldin subunit 2 OS=Homo sapiens GN=PFDN2 PE=1 SV=1	2	164.6	1519.6	1596.6	PFDN2	1.05067	0.0713113
Q59HE3	Calpastatin isoform a variant (Fragment) OS=Homo sapiens PE=2 SV=1	2	475	786.6	826.2	CAST	1.05034	0.0708609
Q32P28	Prolyl 3-hydroxylase 1 OS=Homo sapiens GN=P3H1 PE=1 SV=2	2	7.4	18	18.9	LEPRE1; P3H1	1.05	0.0703893
A0A0A6YYL6	Protein RPL17-C18orf32 OS=Homo sapiens GN=RPL17-C18orf32 PE=3 SV=1	2	308.6	2341.8	2456.6	RPL17-C18ORF32; RPL17	1.04902	0.0690451
A0A140VK70	Testis secretory sperm-binding protein Li 197a OS=Homo sapiens PE=2 SV=1	2	277.4	679.5	712.8	PSMC2	1.04901	0.0690238
P14735	Insulin-degrading enzyme OS=Homo sapiens GN=IDE PE=1 SV=4	2	177.7	237.7	249.3	IDE	1.0488	0.068741
B0QZ18	Copine-1 OS=Homo sapiens GN=CPNE1 PE=1 SV=1	2	91.3	167	175.1	CPNE1	1.0485	0.068331
A8K6I5	Signal transducer and activator of transcription OS=Homo sapiens PE=2 SV=1	1	147.2	301.5	316.1	STAT5A	1.04842	0.068223
Q9NVT9	Armadillo repeat-containing protein 1 OS=Homo sapiens GN=ARMC1 PE=1 SV=1	1	36.5	119.8	125.6	ARMC1	1.04841	0.0682086
A0A087X2I1	26S proteasome regulatory subunit 10B OS=Homo sapiens GN=PSMC6 PE=1 SV=1	2	159.7	332.9	349	PSMC6	1.04836	0.0681382
P21333	Filamin-A OS=Homo sapiens GN=FLNA PE=1 SV=4	2	9604	11879.2	12451.7	FLNA	1.04819	0.067905
Q9Y6W5	Wiskott-Aldrich syndrome protein family member 2 OS=Homo sapiens GN=WASF2 PE=1 SV=3	2	73.4	153.7	161.1	WASF2	1.04815	0.0678393
P0C7P3	Protein SLFN14 OS=Homo sapiens GN=SLFN14 PE=1 SV=2	1	12.5	25	26.2	SLFN14	1.048	0.0676387
A8K3B6	Tyrosine-protein kinase OS=Homo sapiens PE=2 SV=1	2	81.7	98	102.7	CSK	1.04796	0.0675825
Q9Y4C2	TRPM8 channel-associated factor 1 OS=Homo sapiens GN=TCAF1 PE=1 SV=3	2	221.9	709.4	743.4	FAM115A; TCAF1	1.04793	0.0675394
Q460N5	Poly [ADP-ribose] polymerase 14 OS=Homo sapiens GN=PARP14 PE=1 SV=3	1	55.6	129.7	135.9	PARP14	1.0478	0.067367
F8W0W8	Serine/threonine-protein phosphatase OS=Homo sapiens GN=PPP1CC PE=1 SV=1	2	49.6	111.5	116.8		1.04753	0.0669966
Q53SS8	Epididymis secretory protein Li 85 OS=Homo sapiens GN=PCBP1 PE=2 SV=1	2	463.5	825.1	863.9	PCBP1	1.04702	0.0662953
Q93034	Cullin-5 OS=Homo sapiens GN=CUL5 PE=1 SV=4	2	371.5	592.3	620.1	CUL5	1.04694	0.0661728
P17936	Insulin-like growth factor-binding protein 3 OS=Homo sapiens GN=IGFBP3 PE=1 SV=2	1	38.3	105	109.9	IGFBP3	1.04667	0.0658021
A0A024R9T6	HCG17415, isoform CRA_a OS=Homo sapiens GN=SLAIN2 PE=2 SV=1	1	20.1	53.8	56.3	SLAIN2	1.04647	0.0655287
Q9P0L0	Vesicle-associated membrane protein-associated protein A OS=Homo sapiens GN=VAPA PE=1 SV=3	2	74.4	168.5	176.3	VAPA	1.04629	0.0652839
A0A109NGN6	Proteasome subunit alpha type OS=Homo sapiens PE=2 SV=1	2	212.7	363.8	380.5	PSMA5	1.0459	0.0647509
Q86XN8	RNA-binding protein MEX3D OS=Homo sapiens GN=MEX3D PE=1 SV=3	1	30.3	63.6	66.5	MEX3D	1.0456	0.0643276
A8K168	Malic enzyme OS=Homo sapiens PE=2 SV=1	2	62.3	61.5	64.3	ME1	1.04553	0.0642323
O95218	Zinc finger Ran-binding domain-containing protein 2 OS=Homo sapiens GN=ZRANB2 PE=1 SV=2	2	76	386.4	403.8	ZRANB2	1.04503	0.0635458
E7EPK1	Septin-7 OS=Homo sapiens GN=SEPT7 PE=1 SV=2	2	914.9	1353.1	1413.8		1.04486	0.0633096
B0QY89	Eukaryotic translation initiation factor 3 subunit L OS=Homo sapiens GN=EIF3L PE=1 SV=1	2	487.7	928.2	969.7	EIF3L	1.04471	0.0631028
V9HW41	Epididymis secretory protein Li 71 OS=Homo sapiens GN=HEL-S-71 PE=2 SV=1	2	22.8	64.9	67.8	UBE2N	1.04468	0.0630668
Q8WX93	Palladin OS=Homo sapiens GN=PALLD PE=1 SV=3	2	173.4	278.3	290.4	PALLD	1.04348	0.0614005
E7EV01	Calpain-5 OS=Homo sapiens GN=CAPN5 PE=1 SV=2	1	30.1	30.1	31.4	CAPN5	1.04319	0.0610011
O00154	Cytosolic acyl coenzyme A thioester hydrolase OS=Homo sapiens GN=ACOT7 PE=1 SV=3	2	68.7	83.6	87.2	ACOT7	1.04306	0.0608252
A0A024R866	Ribosomal protein L35, isoform CRA_a OS=Homo sapiens GN=RPL35 PE=3 SV=1	2	40.8	88.4	92.2	RPL35	1.04299	0.0607204
B7Z6Z4	Myosin light polypeptide 6 OS=Homo sapiens GN=MYL6 PE=1 SV=1	2	924.3	1931.4	2014.1	MYL6	1.04282	0.0604883
O00231	26S proteasome non-ATPase regulatory subunit 11 OS=Homo sapiens GN=PSMD11 PE=1 SV=3	2	105	226.6	236.3	PSMD11	1.04281	0.0604718
E9PAU2	Ribonucleoprotein PTB-binding 1 OS=Homo sapiens GN=RAVER1 PE=1 SV=1	1	65.3	75.1	78.3	RAVER1	1.04261	0.0601994
P60174	Triosephosphate isomerase OS=Homo sapiens GN=TPI1 PE=1 SV=3	2	603.3	817.1	851.9	TPI1	1.04259	0.0601714
Q8NBS9	Thioredoxin domain-containing protein 5 OS=Homo sapiens GN=TXNDC5 PE=1 SV=2	2	210.3	425.4	443.5	TXNDC5	1.04255	0.0601141
B4E1J8	cDNA FLJ56285, highly similar to ADP-ribosylation factor-like protein 8B OS=Homo sapiens PE=2 SV=1	2	24.8	49.4	51.5	ARL8B	1.04251	0.0600614
Q3SYG4	Protein PTHB1 OS=Homo sapiens GN=BBS9 PE=1 SV=1	1	2.6	28.3	29.5	BBS9	1.0424	0.0599129
O60502	Protein O-GlcNAcase OS=Homo sapiens GN=MGEA5 PE=1 SV=2	2	52.7	75.9	79.1	MGEA5	1.04216	0.0595778
O75069	Transmembrane and coiled-coil domains protein 2 OS=Homo sapiens GN=TMCC2 PE=1 SV=3	1	16.1	43.1	44.9	TMCC2	1.04176	0.0590276
P04040	Catalase OS=Homo sapiens GN=CAT PE=1 SV=3	2	105.1	146.4	152.5	CAT	1.04167	0.0588937
Q86WT1	Tetratricopeptide repeat protein 30A OS=Homo sapiens GN=TTC30A PE=2 SV=3	1	21.7	91.5	95.3	TTC30A	1.04153	0.0587045
Q8IWC1	MAP7 domain-containing protein 3 OS=Homo sapiens GN=MAP7D3 PE=1 SV=2	1	37	118.5	123.4	MAP7D3	1.04135	0.0584553
Q15008	26S proteasome non-ATPase regulatory subunit 6 OS=Homo sapiens GN=PSMD6 PE=1 SV=1	2	134.8	199.5	207.7	PSMD6	1.0411	0.0581125
O95359	Transforming acidic coiled-coil-containing protein 2 OS=Homo sapiens GN=TACC2 PE=1 SV=3	1	30.1	63.4	66	TACC2	1.04101	0.0579832
B2R4V2	cDNA, FLJ92227, highly similar to Homo sapiens ribosomal protein L36a-like (RPL36AL), mRNA OS=Homo sapiens PE=2 SV=1	2	19.4	63.5	66.1	RPL36AL	1.04094	0.0578937
P52209	6-phosphogluconate dehydrogenase, decarboxylating OS=Homo sapiens GN=PGD PE=1 SV=3	2	338.2	368.9	383.9	PGD	1.04066	0.0575008
Q9NU22	Midasin OS=Homo sapiens GN=MDN1 PE=1 SV=2	2	268.1	560.8	583.6	MDN1	1.04066	0.0574935
J3KR97	Tubulin-specific chaperone D OS=Homo sapiens GN=TBCD PE=1 SV=1	2	57.3	81.5	84.8	TBCD	1.04049	0.0572642
B3KN49	cDNA FLJ13562 fis, clone PLACE1008080, highly similar to Homo sapiens hexamethylene bis-acetamide inducible 1 (HEXIM1), mRNA OS=Homo sapiens PE=2 SV=1	2	73.4	195.2	203.1	HEXIM1	1.04047	0.0572372
O75817	Ribonuclease P protein subunit p20 OS=Homo sapiens GN=POP7 PE=1 SV=2	2	39.4	64.3	66.9	POP7	1.04044	0.0571875
A0A024R8A0	Rab9 effector protein with kelch motifs isoform 1 OS=Homo sapiens GN=RABEPK PE=2 SV=1	1	12.9	27.3	28.4	RABEPK	1.04029	0.05699
P12081	Histidine--tRNA ligase, cytoplasmic OS=Homo sapiens GN=HARS PE=1 SV=2	2	124.9	181.4	188.7	HARS	1.04024	0.05692
V9HW43	Epididymis secretory protein Li 102 OS=Homo sapiens GN=HEL-S-102 PE=2 SV=1	2	300.2	679.7	706.8	HSPB1	1.03987	0.0564039
Q13596	Sorting nexin-1 OS=Homo sapiens GN=SNX1 PE=1 SV=3	2	14.9	22.6	23.5	SNX1	1.03982	0.056338
O43294	Transforming growth factor beta-1-induced transcript 1 protein OS=Homo sapiens GN=TGFB1I1 PE=1 SV=2	2	22.8	80.9	84.1	TGFB1I1	1.03956	0.0559661
O43681	ATPase ASNA1 OS=Homo sapiens GN=ASNA1 PE=1 SV=2	2	11.6	63.7	66.2	ASNA1	1.03925	0.0555378
A6QKW0	SHINC3 OS=Homo sapiens GN=SHINC3 PE=2 SV=1	2	29.4	84.2	87.5	TMEM33	1.03919	0.0554628
Q6FI00	CCND1 protein OS=Homo sapiens GN=CCND1 PE=2 SV=1	2	21.2	120.3	125	CCND1	1.03907	0.0552915
O15021	Microtubule-associated serine/threonine-protein kinase 4 OS=Homo sapiens GN=MAST4 PE=1 SV=3	1	77.6	202.3	210.1	MAST4	1.03856	0.0545798
Q5VWC4	26S proteasome non-ATPase regulatory subunit 4 OS=Homo sapiens GN=PSMD4 PE=1 SV=1	2	225.1	519.8	539.7	PSMD4	1.03828	0.0542011
Q53HB3	Proteasome 26S ATPase subunit 1 variant (Fragment) OS=Homo sapiens PE=1 SV=1	2	209.6	482	500.4	PSMC1	1.03817	0.0540486
P26038	Moesin OS=Homo sapiens GN=MSN PE=1 SV=3	2	2612.9	3646.7	3785.7	MSN	1.03812	0.0539686
V9HWB8	Pyruvate kinase OS=Homo sapiens GN=HEL-S-30 PE=1 SV=1	2	3450.9	3382.9	3511.6	PKM	1.03804	0.053868
B2R960	cDNA, FLJ94230, highly similar to Homo sapiens thioredoxin-like 1 (TXNL1), mRNA OS=Homo sapiens PE=2 SV=1	2	186	271.1	281.4	TXNL1	1.03799	0.0537972
Q4W4Y1	Dopamine receptor interacting protein 4 OS=Homo sapiens GN=DRIP4 PE=2 SV=1	2	1195.5	1442.7	1496.7	PDCD6IP	1.03743	0.0530137
P84022	Mothers against decapentaplegic homolog 3 OS=Homo sapiens GN=SMAD3 PE=1 SV=1	2	12.8	35.2	36.5	SMAD3	1.03693	0.052321
Q9UEW8	STE20/SPS1-related proline-alanine-rich protein kinase OS=Homo sapiens GN=STK39 PE=1 SV=3	2	175.6	311.9	323.4	STK39	1.03687	0.0522361
A0A024R994	Copine III, isoform CRA_a OS=Homo sapiens GN=CPNE3 PE=4 SV=1	2	747.1	657.2	681.3	CPNE3	1.03667	0.0519577
Q5H9N4	Uncharacterized protein DKFZp686L20222 OS=Homo sapiens GN=DKFZp686L20222 PE=3 SV=1	2	35.8	80.7	83.6	CDK1	1.03594	0.0509343
Q8NF17	FLJ00385 protein (Fragment) OS=Homo sapiens GN=FLJ00385 PE=1 SV=1	1	120.6	159	164.7	IGHM	1.03585	0.0508138
H3BRJ5	Uncharacterized protein OS=Homo sapiens PE=4 SV=1	2	37.7	140	145		1.03571	0.0506261
A0A024QZ89	Component of oligomeric golgi complex 4, isoform CRA_d OS=Homo sapiens GN=COG4 PE=4 SV=1	1	15.3	64.4	66.7	COG4	1.03571	0.0506261
Q14126	Desmoglein-2 OS=Homo sapiens GN=DSG2 PE=1 SV=2	1	69.3	70.1	72.6	DSG2	1.03566	0.0505551
A8MUH2	ATP synthase-coupling factor 6, mitochondrial OS=Homo sapiens GN=ATP5J PE=1 SV=1	2	7.6	22.6	23.4		1.0354	0.0501858
Q53EP0	Fibronectin type III domain-containing protein 3B OS=Homo sapiens GN=FNDC3B PE=1 SV=2	2	43.8	102.1	105.7	FNDC3B	1.03526	0.0499925
P30101	Protein disulfide-isomerase A3 OS=Homo sapiens GN=PDIA3 PE=1 SV=4	2	313.2	654.4	677.2	PDIA3	1.03484	0.0494092
Q9UHD8	Septin-9 OS=Homo sapiens GN=SEPT9 PE=1 SV=2	2	392.5	593.5	614.1	SEPT9	1.03471	0.0492256
H7BYT1	Casein kinase I isoform delta OS=Homo sapiens GN=CSNK1D PE=1 SV=2	1	40.7	66.3	68.6	CSNK1D	1.03469	0.0491997
Q9H0U6	39S ribosomal protein L18, mitochondrial OS=Homo sapiens GN=MRPL18 PE=1 SV=1	2	10.3	32	33.1	MRPL18	1.03438	0.0487593
Q9NZN5	Rho guanine nucleotide exchange factor 12 OS=Homo sapiens GN=ARHGEF12 PE=1 SV=1	2	89.1	161.2	166.7	ARHGEF12	1.03412	0.0484024
Q14693	Phosphatidate phosphatase LPIN1 OS=Homo sapiens GN=LPIN1 PE=1 SV=2	2	82.9	158.3	163.7	LPIN1	1.03411	0.0483931
K7PML8	Cyclin-dependent kinase inhibitor 2A OS=Homo sapiens GN=CDKN2A PE=2 SV=1	2	37.3	172.2	178	CDKN2A	1.03368	0.0477921
P08559	Pyruvate dehydrogenase E1 component subunit alpha, somatic form, mitochondrial OS=Homo sapiens GN=PDHA1 PE=1 SV=3	2	71.5	104.2	107.7	PDHA1	1.03359	0.047663
Q8WUP2	Filamin-binding LIM protein 1 OS=Homo sapiens GN=FBLIM1 PE=1 SV=2	2	20.6	47.8	49.4	FBLIM1	1.03347	0.0475004
A0A140VJL8	Inositol-1-monophosphatase OS=Homo sapiens PE=2 SV=1	2	27.7	30	31	IMPA1	1.03333	0.0473057
D9ZGF8	Rho-associated protein kinase OS=Homo sapiens GN=ROCK1 PE=3 SV=1	2	130.2	311.9	322.2	ROCK1	1.03302	0.0468729
Q9UJU6	Drebrin-like protein OS=Homo sapiens GN=DBNL PE=1 SV=1	2	148.8	261.7	270.3	DBNL	1.03286	0.0466476
[truncated: 811 more rows]

## Sheet: HA-WDR34 Pull downs
			Abundances				Ratios
Accession	Protein	Identified in # experiments	WT HA-GFP	WT HA-WDR34	WDR60KO HA-WDR34	Gene ID	WDR60KO HAWDR34/WT	WDR60KO HAWDR34/WT Log2
Q6ZW31	Rho GTPase-activating protein SYDE1 OS=Homo sapiens GN=SYDE1 PE=1 SV=1	2	6.5	59.4	2.9	SYDE1	0.0488215	-4.35634
B0I1S0	DYNC2H1 variant protein OS=Homo sapiens PE=2 SV=1	2	643.8	10145.4	928.6	DYNC2H1	0.0915292	-3.44962
P63172	Dynein light chain Tctex-type 1 OS=Homo sapiens GN=DYNLT1 PE=1 SV=1	2	20.3	209.7	22.4	DYNLT1	0.106819	-3.22676
B2R4M6	Protein S100 OS=Homo sapiens PE=2 SV=1	1	32.6	354.5	40.3	S100A9	0.113681	-3.13693
A8MUH2	ATP synthase-coupling factor 6, mitochondrial OS=Homo sapiens GN=ATP5J PE=1 SV=1	1	7.6	63.3	7.4		0.116904	-3.09661
A0A0A0MQX1	Unconventional myosin-X OS=Homo sapiens GN=MYO10 PE=1 SV=1	2		8.6	1.3		0.151163	-2.72583
Q14525	Keratin, type I cuticular Ha3-II OS=Homo sapiens GN=KRT33B PE=1 SV=3	1	430.5	10.4	1.7	KRT33B	0.163462	-2.61298
Q13541	Eukaryotic translation initiation factor 4E-binding protein 1 OS=Homo sapiens GN=EIF4EBP1 PE=1 SV=3	1	10.8	22.4	3.8	EIF4EBP1	0.169643	-2.55943
P38935	DNA-binding protein SMUBP-2 OS=Homo sapiens GN=IGHMBP2 PE=1 SV=3	1	8.3	15.3	3.1	IGHMBP2	0.202614	-2.30319
Q13501	Sequestosome-1 OS=Homo sapiens GN=SQSTM1 PE=1 SV=1	1	8.1	18.4	3.8	SQSTM1	0.206522	-2.27563
P16949	Stathmin OS=Homo sapiens GN=STMN1 PE=1 SV=3	2	778.6	2772.3	585.3	STMN1	0.211124	-2.24384
A1A4E9	Keratin 13 OS=Homo sapiens GN=KRT13 PE=1 SV=1	2	35.9	154.5	32.7	KRT13	0.21165	-2.24024
B1AKJ5	Nardilysin OS=Homo sapiens GN=NRDC PE=1 SV=1	2	86.5	279.1	59.2	NRD1; NRDC	0.21211	-2.23711
A8MWX3	Putative WAS protein family homolog 4 OS=Homo sapiens GN=WASH4P PE=5 SV=1	2	3.8	13	2.8		0.215385	-2.21501
O15347	High mobility group protein B3 OS=Homo sapiens GN=HMGB3 PE=1 SV=4	2	115.8	356.3	78.2	HMGB3	0.219478	-2.18785
B2R5H0	Protein S100 OS=Homo sapiens PE=2 SV=1	2	15.4	74	16.5	S100A11	0.222973	-2.16506
B8ZWD9	Diazepam binding inhibitor, splice form 1D(2) OS=Homo sapiens GN=DBI PE=2 SV=1	2	20.2	97.5	21.8	DBI	0.22359	-2.16107
Q6NX51	Exocyst complex component 4 OS=Homo sapiens GN=EXOC4 PE=2 SV=1	2	46.1	130.5	30.3	EXOC4	0.232184	-2.10666
D3DPK5	SH3 domain binding glutamic acid-rich protein like 3, isoform CRA_a (Fragment) OS=Homo sapiens GN=SH3BGRL3 PE=4 SV=1	2	38.8	150.5	35.6	SH3BGRL3	0.236545	-2.07981
K7ESQ2	Kinetochore protein Spc24 (Fragment) OS=Homo sapiens GN=SPC24 PE=1 SV=1	1	10.9	8.8	2.1		0.238636	-2.06711
V9HWC9	Superoxide dismutase [Cu-Zn] OS=Homo sapiens GN=HEL-S-44 PE=2 SV=1	2	124	673.8	163.1	SOD1	0.24206	-2.04656
A4D1E9	GTP-binding protein 10 OS=Homo sapiens GN=GTPBP10 PE=1 SV=1	1	8.1	15.4	3.8	GTPBP10	0.246753	-2.01886
Q53G87	ENG protein (Endoglin) (Osler-Rendu-Weber syndrome 1) variant (Fragment) OS=Homo sapiens PE=2 SV=1	1	76.4	398.5	99.3	ENG	0.249184	-2.00471
Q32Q12	Nucleoside diphosphate kinase OS=Homo sapiens GN=NME1-NME2 PE=1 SV=1	2	229.1	824.7	210.4	NME1-NME2	0.255123	-1.97073
B1AKZ4	Phosphoprotein enriched in astrocytes 15, isoform CRA_a OS=Homo sapiens GN=PEA15 PE=2 SV=1	2	57	309.6	79.2	PEA15	0.255814	-1.96683
Q9P2K1	Coiled-coil and C2 domain-containing protein 2A OS=Homo sapiens GN=CC2D2A PE=1 SV=3	1	50	211.8	54.7	CC2D2A	0.258263	-1.95309
Q15691	Microtubule-associated protein RP/EB family member 1 OS=Homo sapiens GN=MAPRE1 PE=1 SV=3	2	17.1	49.7	13.1	MAPRE1	0.263581	-1.92368
Q96B97	SH3 domain-containing kinase-binding protein 1 OS=Homo sapiens GN=SH3KBP1 PE=1 SV=2	2	114.3	138.9	36.9	SH3KBP1	0.265659	-1.91235
P49006	MARCKS-related protein OS=Homo sapiens GN=MARCKSL1 PE=1 SV=2	2	12.5	55.2	14.7	MARCKSL1	0.266304	-1.90885
Q9UKY7	Protein CDV3 homolog OS=Homo sapiens GN=CDV3 PE=1 SV=1	2	105.6	293.3	78.4	CDV3	0.267303	-1.90345
Q53GA4	Pleckstrin homology-like domain family A member 2 OS=Homo sapiens GN=PHLDA2 PE=1 SV=2	1	61.4	958.4	257.1	PHLDA2	0.26826	-1.8983
A0A024RDR0	High-mobility group box 1, isoform CRA_a OS=Homo sapiens GN=HMGB1 PE=4 SV=1	2	474	1414.2	384.5	HMGB1	0.271885	-1.87893
P61604	10 kDa heat shock protein, mitochondrial OS=Homo sapiens GN=HSPE1 PE=1 SV=2	2	202.9	721.3	198	HSPE1	0.274504	-1.8651
A0A024R3E4	Yes-associated protein 1, 65kDa, isoform CRA_b OS=Homo sapiens GN=YAP1 PE=4 SV=1	2	25.8	66.2	18.2	YAP1	0.274924	-1.86289
A6NFX8	ADP-sugar pyrophosphatase OS=Homo sapiens GN=NUDT5 PE=1 SV=1	1	56.2	74.9	20.7		0.276368	-1.85533
Q15631	Translin OS=Homo sapiens GN=TSN PE=1 SV=1	2	50.3	130	36	TSN	0.276923	-1.85244
Q58FF9	Heat shock protein 90Af OS=Homo sapiens GN=HSP90Af PE=2 SV=1	1	8.9	44.6	12.4	HSP90AA6P	0.278027	-1.8467
O14545	TRAF-type zinc finger domain-containing protein 1 OS=Homo sapiens GN=TRAFD1 PE=1 SV=1	1	13.8	31.9	8.9	TRAFD1	0.278997	-1.84168
Q92688	Acidic leucine-rich nuclear phosphoprotein 32 family member B OS=Homo sapiens GN=ANP32B PE=1 SV=1	2	137	648.9	181.1	ANP32B	0.279088	-1.84121
Q86XN8	RNA-binding protein MEX3D OS=Homo sapiens GN=MEX3D PE=1 SV=3	1	30.3	107.8	30.2	MEX3D	0.280148	-1.83574
Q13442	28 kDa heat- and acid-stable phosphoprotein OS=Homo sapiens GN=PDAP1 PE=1 SV=1	2	203.3	429.4	121.6	PDAP1	0.283186	-1.82018
E5RHG6	Tubulin-specific chaperone A OS=Homo sapiens GN=TBCA PE=1 SV=2	1	44.6	194.3	55.2	TBCA	0.284097	-1.81555
Q5VXV3	SET OS=Homo sapiens GN=SET PE=2 SV=1	2	213.3	947.9	270.1	SET	0.284946	-1.81124
Q8ND56	Protein LSM14 homolog A OS=Homo sapiens GN=LSM14A PE=1 SV=3	2	34.5	90.1	25.7	LSM14A	0.285239	-1.80976
P29966	Myristoylated alanine-rich C-kinase substrate OS=Homo sapiens GN=MARCKS PE=1 SV=4	2	148.2	607.1	173.7	MARCKS	0.286114	-1.80534
P30049	ATP synthase subunit delta, mitochondrial OS=Homo sapiens GN=ATP5D PE=1 SV=2	2	30.1	107.7	31	ATP5D	0.287837	-1.79668
P0CG34	Thymosin beta-15A OS=Homo sapiens GN=TMSB15A PE=1 SV=1	2	24.5	69	19.9	TMSB15A; LOC101060235; TMSB15B	0.288406	-1.79383
P53634	Dipeptidyl peptidase 1 OS=Homo sapiens GN=CTSC PE=1 SV=2	2	130	604.2	175.4	CTSC	0.290301	-1.78438
P67936	Tropomyosin alpha-4 chain OS=Homo sapiens GN=TPM4 PE=1 SV=3	2	228.7	653.5	190	TPM4	0.290742	-1.78219
O43294	Transforming growth factor beta-1-induced transcript 1 protein OS=Homo sapiens GN=TGFB1I1 PE=1 SV=2	2	22.8	110.7	32.4	TGFB1I1	0.292683	-1.77259
Q9UK76	Jupiter microtubule associated homolog 1 OS=Homo sapiens GN=JPT1 PE=1 SV=3	2	17	33.3	9.8	HN1; JPT1	0.294294	-1.76467
B2R825	Alpha-1,4 glucan phosphorylase OS=Homo sapiens PE=2 SV=1	2	36.1	89.7	26.6	PYGL	0.296544	-1.75368
P02795	Metallothionein-2 OS=Homo sapiens GN=MT2A PE=1 SV=1	1	331.9	1386.8	412	MT2A	0.297087	-1.75104
Q969S3	Zinc finger protein 622 OS=Homo sapiens GN=ZNF622 PE=1 SV=1	2	11.5	25.2	7.5	ZNF622	0.297619	-1.74846
B4DHQ3	Phosphoserine aminotransferase OS=Homo sapiens PE=2 SV=1	2	115.6	244.7	73	PSAT1	0.298324	-1.74505
P06703	Protein S100-A6 OS=Homo sapiens GN=S100A6 PE=1 SV=1	2	178.4	956.6	285.5	S100A6	0.298453	-1.74443
Q9UII2	ATPase inhibitor, mitochondrial OS=Homo sapiens GN=ATPIF1 PE=1 SV=1	2	23.4	106.1	31.7	ATPIF1	0.298775	-1.74287
P09496	Clathrin light chain A OS=Homo sapiens GN=CLTA PE=1 SV=1	1	377.5	1050.2	314.1	CLTA	0.299086	-1.74137
B5BU24	14-3-3 protein beta/alpha OS=Homo sapiens GN=YWHAB PE=2 SV=1	2	114.6	337.3	100.9	YWHAB	0.29914	-1.74111
Q5U077	L-lactate dehydrogenase OS=Homo sapiens GN=LDHB PE=2 SV=1	2	1157	2219.6	665.4	LDHB	0.299784	-1.73801
P06733	Alpha-enolase OS=Homo sapiens GN=ENO1 PE=1 SV=2	2	2496.9	5343.6	1605.9	ENO1	0.300528	-1.73443
F6WQW2	Ran-specific GTPase-activating protein OS=Homo sapiens GN=RANBP1 PE=1 SV=1	2	34	63.8	19.2	RANBP1	0.30094	-1.73245
O14531	Dihydropyrimidinase-related protein 4 OS=Homo sapiens GN=DPYSL4 PE=1 SV=2	1	22.6	39.5	11.9	DPYSL4	0.301266	-1.73089
Q6UXH1	Cysteine-rich with EGF-like domain protein 2 OS=Homo sapiens GN=CRELD2 PE=1 SV=1	2	22.4	77.9	23.6	CRELD2	0.302953	-1.72284
Q12986	Transcriptional repressor NF-X1 OS=Homo sapiens GN=NFX1 PE=1 SV=2	1	3.3	8.9	2.7	NFX1	0.303371	-1.72085
Q00688	Peptidyl-prolyl cis-trans isomerase FKBP3 OS=Homo sapiens GN=FKBP3 PE=1 SV=1	2	92.4	225.1	68.4	FKBP3	0.303865	-1.7185
A0A024R1S8	LIM and SH3 protein 1, isoform CRA_b OS=Homo sapiens GN=LASP1 PE=4 SV=1	2	1055.9	2508.4	762.3	LASP1	0.303899	-1.71834
Q5T765	Interferon-induced protein with tetratricopeptide repeats 3, isoform CRA_a OS=Homo sapiens GN=IFIT3 PE=2 SV=1	1	29.7	95.8	29.2	IFIT3	0.304802	-1.71406
Q5T5H1	Alpha-endosulfine OS=Homo sapiens GN=ENSA PE=1 SV=1	2	36.3	90.8	27.8	ENSA	0.306167	-1.70761
A0A024R3W7	Eukaryotic translation elongation factor 1 beta 2, isoform CRA_a OS=Homo sapiens GN=EEF1B2 PE=3 SV=1	2	210.7	419.6	128.7	EEF1B2	0.306721	-1.705
Q9NQC3	Reticulon-4 OS=Homo sapiens GN=RTN4 PE=1 SV=2	1	23	76.1	23.4	RTN4	0.30749	-1.70139
A0A0B4J2C3	Translationally-controlled tumor protein OS=Homo sapiens GN=TPT1 PE=1 SV=1	2	40.8	219.6	67.6	TPT1	0.307832	-1.69978
P52209	6-phosphogluconate dehydrogenase, decarboxylating OS=Homo sapiens GN=PGD PE=1 SV=3	2	338.2	740.1	228.4	PGD	0.308607	-1.69616
Q59EN5	Prosaposin variant (Fragment) OS=Homo sapiens PE=2 SV=1	2	178.8	767.5	238.1	PSAP	0.310228	-1.6886
B2R8N1	cDNA, FLJ93976, highly similar to Homo sapiens COP9 homolog (COP9), mRNA OS=Homo sapiens PE=2 SV=1	2	33.5	42.2	13.1	COPS8	0.310427	-1.68768
O15231	Zinc finger protein 185 OS=Homo sapiens GN=ZNF185 PE=1 SV=3	2	221.6	408.8	127.2	ZNF185	0.311155	-1.6843
B4DRM3	cDNA FLJ54492, highly similar to Eukaryotic translation initiation factor 4B OS=Homo sapiens PE=2 SV=1	2	430.9	1109.6	346.2	EIF4B	0.312004	-1.68036
A0A024R7S3	Clathrin light chain OS=Homo sapiens GN=CLTB PE=3 SV=1	2	240.9	593.7	186.3	CLTB	0.313795	-1.67211
A0A140VK56	Transaldolase OS=Homo sapiens PE=2 SV=1	2	357.8	958.8	301	TALDO1	0.313934	-1.67147
A0A158RFU6	RAB7, member RAS oncogene family, isoform CRA_a OS=Homo sapiens GN=RAB7A PE=2 SV=1	2	69.9	204	64.1	RAB7A	0.314216	-1.67017
P54727	UV excision repair protein RAD23 homolog B OS=Homo sapiens GN=RAD23B PE=1 SV=1	2	189.3	605.1	190.7	RAD23B	0.315155	-1.66587
B4DJQ5	cDNA FLJ59211, highly similar to Glucosidase 2 subunit beta OS=Homo sapiens PE=2 SV=1	2	125.7	585	184.4	PRKCSH	0.315214	-1.6656
D3DQ70	SERPINE1 mRNA binding protein 1, isoform CRA_d OS=Homo sapiens GN=SERBP1 PE=4 SV=1	2	527.8	1424.7	449.2	SERBP1	0.315294	-1.66523
B2R4C1	cDNA, FLJ92036, highly similar to Homo sapiens ribosomal protein L31 (RPL31), mRNA OS=Homo sapiens PE=2 SV=1	2	148.6	674	212.8	RPL31	0.315727	-1.66325
Q15738	Sterol-4-alpha-carboxylate 3-dehydrogenase, decarboxylating OS=Homo sapiens GN=NSDHL PE=1 SV=2	2	54.6	203.8	64.4	NSDHL	0.315996	-1.66202
O75521	Enoyl-CoA delta isomerase 2, mitochondrial OS=Homo sapiens GN=ECI2 PE=1 SV=4	2	39.5	94.3	29.8	ECI2	0.316013	-1.66195
A0A140VKA6	Testis secretory sperm-binding protein Li 233m OS=Homo sapiens PE=2 SV=1	2	85.7	736.1	232.9	ST13	0.316397	-1.66019
J3KQY1	39S ribosomal protein L22, mitochondrial OS=Homo sapiens GN=MRPL22 PE=1 SV=1	1	12.9	44.4	14.1		0.317568	-1.65486
A0A0S2Z3H6	Cleft lip and palate associated transmembrane protein 1 isoform 1 (Fragment) OS=Homo sapiens GN=CLPTM1 PE=2 SV=1	1	12.6	47.6	15.2	CLPTM1	0.319328	-1.64689
F8VXU5	Vacuolar protein sorting-associated protein 29 OS=Homo sapiens GN=VPS29 PE=1 SV=1	2	37.8	78.5	25.1	VPS29	0.319745	-1.64501
O14562	Ubiquitin domain-containing protein UBFD1 OS=Homo sapiens GN=UBFD1 PE=1 SV=2	2	56.4	118.7	38	UBFD1	0.320135	-1.64325
A0A024R4R3	CCR4-NOT transcription complex, subunit 3, isoform CRA_a OS=Homo sapiens GN=CNOT3 PE=4 SV=1	2	6.6	17.8	5.7	CNOT3	0.320225	-1.64284
P00338	L-lactate dehydrogenase A chain OS=Homo sapiens GN=LDHA PE=1 SV=2	2	2198.1	3673.7	1179	LDHA	0.32093	-1.63967
Q9P0L0	Vesicle-associated membrane protein-associated protein A OS=Homo sapiens GN=VAPA PE=1 SV=3	2	74.4	198.7	63.8	VAPA	0.321087	-1.63896
P61981	14-3-3 protein gamma OS=Homo sapiens GN=YWHAG PE=1 SV=2	2	113.5	263	84.6	YWHAG	0.321673	-1.63633
B2R6J2	cDNA, FLJ92973, highly similar to Homo sapiens villin 2 (ezrin) (VIL2), mRNA OS=Homo sapiens PE=2 SV=1	2	1007.2	1557.7	501.5	EZR	0.321949	-1.6351
B2RDE8	cDNA, FLJ96580, highly similar to Homo sapiens hepatoma-derived growth factor (high-mobility group protein 1-like) (HDGF), mRNA OS=Homo sapiens PE=2 SV=1	2	105.5	327.5	105.8	HDGF	0.323053	-1.63016
A0A169TED2	Protein kinase C OS=Homo sapiens GN=PRKCA PE=2 SV=1	2	32.1	60.2	19.5	PRKCA	0.32392	-1.62629
J3QQX2	Rho GDP-dissociation inhibitor 1 OS=Homo sapiens GN=ARHGDIA PE=1 SV=1	2	21.3	86.6	28.1	ARHGDIA	0.32448	-1.6238
A8K005	cDNA FLJ77896, highly similar to Homo sapiens Ras homolog enriched in brain (RHEB), mRNA OS=Homo sapiens PE=2 SV=1	2	21.3	62.5	20.3	RHEB	0.3248	-1.62238
P58546	Myotrophin OS=Homo sapiens GN=MTPN PE=1 SV=2	2	117.7	260.7	85.1	LUZP6; MTPN	0.326429	-1.61516
A0A1W2PPZ5	Transcription elongation factor A protein 1 OS=Homo sapiens GN=TCEA1 PE=1 SV=1	1	58.5	149.4	48.9		0.327309	-1.61127
Q00765	Receptor expression-enhancing protein 5 OS=Homo sapiens GN=REEP5 PE=1 SV=3	2	35.2	146.2	47.9	REEP5	0.327633	-1.60985
Q4VXZ2	Vacuolar protein sorting 52 (Yeast) OS=Homo sapiens GN=VPS52 PE=4 SV=1	1	8	11.9	3.9	VPS52	0.327731	-1.60942
J3KPS3	Fructose-bisphosphate aldolase OS=Homo sapiens GN=ALDOA PE=1 SV=1	2	708.7	1643.6	539.2	ALDOA	0.32806	-1.60797
Q9Y305	Acyl-coenzyme A thioesterase 9, mitochondrial OS=Homo sapiens GN=ACOT9 PE=1 SV=2	2	201.2	587	192.6	ACOT9	0.328109	-1.60775
A0A140VJK1	Testicular tissue protein Li 75 OS=Homo sapiens PE=2 SV=1	2	68.7	75.1	24.7	GLRX3	0.328895	-1.6043
P14324	Farnesyl pyrophosphate synthase OS=Homo sapiens GN=FDPS PE=1 SV=4	2	127.2	285.6	94.1	FDPS	0.329482	-1.60173
O60869	Endothelial differentiation-related factor 1 OS=Homo sapiens GN=EDF1 PE=1 SV=1	2	142.3	341.3	112.6	EDF1	0.329915	-1.59983
O75937	DnaJ homolog subfamily C member 8 OS=Homo sapiens GN=DNAJC8 PE=1 SV=2	2	185.2	312.1	103.1	DNAJC8	0.330343	-1.59796
A0A0S2Z4I4	Tropomyosin 3 isoform 3 (Fragment) OS=Homo sapiens GN=TPM3 PE=2 SV=1	2	765.7	1908.6	630.5	TPM3	0.330347	-1.59795
O95817	BAG family molecular chaperone regulator 3 OS=Homo sapiens GN=BAG3 PE=1 SV=3	2	215.1	784.8	259.5	BAG3	0.330657	-1.59659
A0A024R5Z9	Pyruvate kinase OS=Homo sapiens GN=PKM2 PE=3 SV=1	2	81.7	133.2	44.1	PKM	0.331081	-1.59474
P12004	Proliferating cell nuclear antigen OS=Homo sapiens GN=PCNA PE=1 SV=1	2	357.1	1001.3	331.9	PCNA	0.331469	-1.59305
Q6FIE5	PHP14 protein OS=Homo sapiens GN=PHP14 PE=2 SV=1	2	53.7	254.1	84.5	PHPT1	0.332546	-1.58837
Q0VDC6	Peptidylprolyl isomerase OS=Homo sapiens GN=FKBP1A PE=1 SV=1	2	9.2	24.3	8.1	FKBP1A	0.333333	-1.58496
Q59GX2	Solute carrier family 2 (Facilitated glucose transporter), member 1 variant (Fragment) OS=Homo sapiens PE=2 SV=1	2	44.9	135.3	45.1	SLC2A1	0.333333	-1.58496
A8K168	Malic enzyme OS=Homo sapiens PE=2 SV=1	2	62.3	94.2	31.4	ME1	0.333333	-1.58496
P30260	Cell division cycle protein 27 homolog OS=Homo sapiens GN=CDC27 PE=1 SV=2	2	6.4	7.5	2.5	CDC27	0.333333	-1.58496
P63104	14-3-3 protein zeta/delta OS=Homo sapiens GN=YWHAZ PE=1 SV=1	2	734.4	2120.4	708	YWHAZ	0.333899	-1.58252
B2R983	cDNA, FLJ94267, highly similar to Homo sapiens glutathione S-transferase omega 1 (GSTO1), mRNA OS=Homo sapiens PE=2 SV=1	2	258.1	647.5	216.7	GSTO1	0.334672	-1.57918
F8W031	Uncharacterized protein (Fragment) OS=Homo sapiens PE=1 SV=1	2	17.6	62.1	20.8		0.334944	-1.57801
P37235	Hippocalcin-like protein 1 OS=Homo sapiens GN=HPCAL1 PE=1 SV=3	2	58.3	205.7	68.9	HPCAL1	0.334954	-1.57797
A0A0S2Z2Z6	Annexin (Fragment) OS=Homo sapiens GN=ANXA6 PE=2 SV=1	2	923.4	2146.1	719.5	ANXA6	0.335259	-1.57665
B2R6A3	Na(+)/H(+) exchange regulatory cofactor NHE-RF OS=Homo sapiens PE=2 SV=1	2	43.5	90.3	30.3	SLC9A3R1	0.335548	-1.57541
Q13884	Beta-1-syntrophin OS=Homo sapiens GN=SNTB1 PE=1 SV=3	1	16.4	28.8	9.7	SNTB1	0.336806	-1.57001
P16070	CD44 antigen OS=Homo sapiens GN=CD44 PE=1 SV=3	2	125.9	577.8	194.7	CD44	0.336968	-1.56932
Q6MZT3	Uncharacterized protein DKFZp686C1054 OS=Homo sapiens GN=DKFZp686C1054 PE=2 SV=1	2	16.4	49.5	16.7	THUMPD1	0.337374	-1.56758
Q6YN16	Hydroxysteroid dehydrogenase-like protein 2 OS=Homo sapiens GN=HSDL2 PE=1 SV=1	2	68.6	143.2	48.4	HSDL2	0.337989	-1.56495
A0A0C4DFM7	Terminal uridylyltransferase 4 OS=Homo sapiens GN=ZCCHC11 PE=1 SV=1	1	103.4	177.8	60.1	ZCCHC11	0.33802	-1.56482
Q6NTG0	SLC9A3R2 protein (Fragment) OS=Homo sapiens GN=SLC9A3R2 PE=2 SV=1	2	114.3	286.3	96.8	SLC9A3R2	0.338107	-1.56445
Q68DE3	Basic helix-loop-helix domain-containing protein USF3 OS=Homo sapiens GN=USF3 PE=1 SV=3	1	99.1	205.6	69.6	KIAA2018; USF3	0.338521	-1.56268
P26038	Moesin OS=Homo sapiens GN=MSN PE=1 SV=3	2	2612.9	4706.4	1598.6	MSN	0.339665	-1.55781
A0A087WTW0	E3 ubiquitin-protein ligase UHRF1 OS=Homo sapiens GN=UHRF1 PE=1 SV=1	1	47.7	99.5	33.8		0.339698	-1.55767
Q9BVG4	Protein PBDC1 OS=Homo sapiens GN=PBDC1 PE=1 SV=1	2	41.8	107.1	36.5	CXorf26; PBDC1	0.340803	-1.55299
A0A0A0MTS2	Glucose-6-phosphate isomerase (Fragment) OS=Homo sapiens GN=GPI PE=1 SV=1	2	456	780.4	266		0.340851	-1.55279
I3L504	Eukaryotic translation initiation factor 5A-1 OS=Homo sapiens GN=EIF5A PE=1 SV=1	2	431.1	1019.2	347.9		0.341346	-1.55069
Q86WB0	Nuclear-interacting partner of ALK OS=Homo sapiens GN=ZC3HC1 PE=1 SV=1	1	32	75.1	25.7	ZC3HC1	0.34221	-1.54704
Q6FGH5	RPS21 protein (Fragment) OS=Homo sapiens GN=RPS21 PE=2 SV=1	2	132.1	369.1	126.5	RPS21	0.342726	-1.54487
Q53G35	Phosphoglycerate mutase (Fragment) OS=Homo sapiens PE=2 SV=1	2	533.2	1285.9	442.5	PGAM1	0.344117	-1.53903
Q8WVJ2	NudC domain-containing protein 2 OS=Homo sapiens GN=NUDCD2 PE=1 SV=1	2	6.8	21.2	7.3	NUDCD2	0.34434	-1.5381
Q5CZB5	Uncharacterized protein DKFZp686M0430 OS=Homo sapiens GN=DKFZp686M0430 PE=2 SV=1	2	15.3	40.6	14	AKAP12	0.344828	-1.53605
A0A024R687	Pleckstrin homology domain containing, family C (With FERM domain) member 1, isoform CRA_b OS=Homo sapiens GN=PLEKHC1 PE=4 SV=1	2	158.9	380.3	131.2	FERMT2	0.344991	-1.53537
D6R956	Ubiquitin carboxyl-terminal hydrolase OS=Homo sapiens GN=UCHL1 PE=1 SV=1	2	318.1	870.2	300.4		0.345208	-1.53446
O43765	Small glutamine-rich tetratricopeptide repeat-containing protein alpha OS=Homo sapiens GN=SGTA PE=1 SV=1	2	10.3	64	22.1	SGTA	0.345313	-1.53403
P26583	High mobility group protein B2 OS=Homo sapiens GN=HMGB2 PE=1 SV=2	2	605.9	1625	561.3	HMGB2	0.345415	-1.5336
P39687	Acidic leucine-rich nuclear phosphoprotein 32 family member A OS=Homo sapiens GN=ANP32A PE=1 SV=1	2	3.5	22	7.6	ANP32A	0.345455	-1.53343
V9HWE0	Annexin OS=Homo sapiens GN=HEL-S-7 PE=2 SV=1	2	418.4	1229.5	424.8	ANXA5	0.345506	-1.53322
J3QRS3	Myosin regulatory light chain 12A OS=Homo sapiens GN=MYL12A PE=1 SV=1	2	147.1	355.9	123.3	MYL12A	0.346446	-1.5293
J3KN67	Tropomyosin alpha-3 chain OS=Homo sapiens GN=TPM3 PE=1 SV=1	2	78.2	223.4	77.4	TPM3	0.346464	-1.52922
Q9H1E3	Nuclear ubiquitous casein and cyclin-dependent kinase substrate 1 OS=Homo sapiens GN=NUCKS1 PE=1 SV=1	2	43.2	132.9	46.1	NUCKS1	0.346877	-1.5275
O95433	Activator of 90 kDa heat shock protein ATPase homolog 1 OS=Homo sapiens GN=AHSA1 PE=1 SV=1	2	158.9	410.7	142.5	AHSA1	0.346969	-1.52712
A0A024RD84	Translocating chain-associated membrane protein OS=Homo sapiens GN=TRAM2 PE=2 SV=1	1	15.1	62.2	21.6	TRAM2	0.347267	-1.52588
E9PB61	THO complex subunit 4 OS=Homo sapiens GN=ALYREF PE=1 SV=1	2	102.3	235.4	81.9	ALYREF	0.347918	-1.52318
Q53FN7	BZW1 protein variant (Fragment) OS=Homo sapiens PE=2 SV=1	2	158.4	330.5	115	BZW1	0.347958	-1.52302
Q0P5N8	TMSB4X protein (Fragment) OS=Homo sapiens GN=TMSB4X PE=2 SV=1	2	253.8	1263.5	440.4	TMSB4X	0.348556	-1.52054
B4DDD6	Drebrin-like protein OS=Homo sapiens GN=DBNL PE=1 SV=1	2	20.1	34.1	11.9	DBNL	0.348974	-1.51881
E5RJR5	S-phase kinase-associated protein 1 OS=Homo sapiens GN=SKP1 PE=1 SV=1	2	25.8	68.7	24		0.349345	-1.51728
A0A024RC00	CTP synthase OS=Homo sapiens GN=CTPS2 PE=3 SV=1	1	28.9	54.1	18.9	CTPS2	0.349353	-1.51724
V9HW91	Epididymis secretory sperm binding protein Li 8a OS=Homo sapiens GN=HEL-S-8a PE=2 SV=1	2	6.7	16.6	5.8	NIT2	0.349398	-1.51706
D6W5Y5	Cold inducible RNA binding protein, isoform CRA_c OS=Homo sapiens GN=CIRBP PE=1 SV=1	2	81.8	246.5	86.2	CIRBP	0.349696	-1.51583
Q9HC36	rRNA methyltransferase 3, mitochondrial OS=Homo sapiens GN=MRM3 PE=1 SV=2	2	15.8	56.9	19.9	RNMTL1; MRM3	0.349736	-1.51566
Q76LA1	CSTB protein OS=Homo sapiens GN=CSTB PE=2 SV=1	2	565	607.4	212.5	CSTB	0.349852	-1.51518
O43242	26S proteasome non-ATPase regulatory subunit 3 OS=Homo sapiens GN=PSMD3 PE=1 SV=2	2	99.7	315.8	110.5	PSMD3	0.349905	-1.51496
Q9UBB6	Neurochondrin OS=Homo sapiens GN=NCDN PE=1 SV=1	2	3.4	22	7.7	NCDN	0.35	-1.51457
A0A024R2H0	TBC1 domain family, member 5, isoform CRA_a OS=Homo sapiens GN=TBC1D5 PE=4 SV=1	2	76.5	65.9	23.1	TBC1D5	0.350531	-1.51239
E9KL30	Proteasome subunit beta type OS=Homo sapiens PE=2 SV=1	2	83.5	252.4	88.5	PSMB7	0.350634	-1.51196
A0A140VK69	Aspartate aminotransferase OS=Homo sapiens PE=2 SV=1	2	172.2	478.8	167.9	GOT1	0.350668	-1.51182
Q59HE3	Calpastatin isoform a variant (Fragment) OS=Homo sapiens PE=2 SV=1	2	475	1120.3	393.5	CAST	0.351245	-1.50945
B2R7P8	cDNA, FLJ93545, highly similar to Homo sapiens 5-aminoimidazole-4-carboxamide ribonucleotide formyltransferase/IMP cyclohydrolase (ATIC), mRNA OS=Homo sapiens PE=2 SV=1	2	117.2	264.4	92.9	ATIC	0.351362	-1.50897
A0A140VJJ2	S-formylglutathione hydrolase OS=Homo sapiens GN=ESD PE=2 SV=1	2	148	194.3	68.3	ESD	0.351518	-1.50833
A0JP11	Phosphoinositide-3-kinase, regulatory subunit 4 OS=Homo sapiens GN=PIK3R4 PE=2 SV=1	1	45.9	56.3	19.8	PIK3R4	0.351687	-1.50763
A2KBC6	Anti-FactorVIII scFv (Fragment) OS=Homo sapiens PE=2 SV=1	1	23.6	75.9	26.7	IGKV3-20	0.351779	-1.50726
Q59EP1	Annexin (Fragment) OS=Homo sapiens PE=2 SV=1	2	9.2	27.8	9.8	ANXA11	0.352518	-1.50423
A8K690	cDNA FLJ76863, highly similar to Homo sapiens stress-induced-phosphoprotein 1 (Hsp70/Hsp90-organizing protein) (STIP1), mRNA OS=Homo sapiens PE=2 SV=1	2	654.2	7385.1	2607.9	STIP1	0.35313	-1.50173
P00558	Phosphoglycerate kinase 1 OS=Homo sapiens GN=PGK1 PE=1 SV=3	2	723.5	1960.7	693.7	PGK1	0.353802	-1.49899
Q96IV0	Peptide-N(4)-(N-acetyl-beta-glucosaminyl)asparagine amidase OS=Homo sapiens GN=NGLY1 PE=1 SV=1	1	26.3	90.4	32	NGLY1	0.353982	-1.49825
Q53EM5	Transketolase variant (Fragment) OS=Homo sapiens PE=2 SV=1	2	1519	2919.3	1034	TKT	0.354194	-1.49739
V9HW25	Epididymis secretory protein Li 273 OS=Homo sapiens GN=HEL-S-273 PE=2 SV=1	2	874.4	2196.9	778.2	TPM2	0.354226	-1.49726
O60566	Mitotic checkpoint serine/threonine-protein kinase BUB1 beta OS=Homo sapiens GN=BUB1B PE=1 SV=3	2	11.5	11	3.9	BUB1B	0.354545	-1.49596
P40925	Malate dehydrogenase, cytoplasmic OS=Homo sapiens GN=MDH1 PE=1 SV=4	2	186.7	493.6	175.1	MDH1	0.354741	-1.49516
Q5VWC4	26S proteasome non-ATPase regulatory subunit 4 OS=Homo sapiens GN=PSMD4 PE=1 SV=1	2	225.1	718.7	255.1	PSMD4	0.354946	-1.49433
Q99584	Protein S100-A13 OS=Homo sapiens GN=S100A13 PE=1 SV=1	2	144.4	458.6	162.8	S100A13	0.354993	-1.49414
P30043	Flavin reductase (NADPH) OS=Homo sapiens GN=BLVRB PE=1 SV=3	2	30.9	73.7	26.2	BLVRB	0.355495	-1.4921
Q9H910	Jupiter microtubule associated homolog 2 OS=Homo sapiens GN=JPT2 PE=1 SV=1	2	107.1	197.7	70.3	HN1L; JPT2	0.355589	-1.49172
H7C2N1	Prothymosin alpha (Fragment) OS=Homo sapiens GN=PTMA PE=1 SV=1	2	86.5	282.5	100.7		0.35646	-1.48819
Q01780	Exosome component 10 OS=Homo sapiens GN=EXOSC10 PE=1 SV=2	2	77.8	239.5	85.4	EXOSC10	0.356576	-1.48772
O14828	Secretory carrier-associated membrane protein 3 OS=Homo sapiens GN=SCAMP3 PE=1 SV=3	2	15.7	57.2	20.4	SCAMP3	0.356643	-1.48745
E9PK25	Cofilin-1 OS=Homo sapiens GN=CFL1 PE=1 SV=1	2	1361	3612.3	1292.3		0.35775	-1.48298
Q8N7G1	Purine nucleoside phosphorylase OS=Homo sapiens PE=2 SV=1	2	366	278	99.5	PNP	0.357914	-1.48232
A0A024R394	Cysteine and histidine-rich domain (CHORD)-containing 1, isoform CRA_c OS=Homo sapiens GN=CHORDC1 PE=4 SV=1	2	35.4	82.9	29.7	CHORDC1	0.358263	-1.48091
E9PRY8	Elongation factor 1-delta OS=Homo sapiens GN=EEF1D PE=1 SV=1	2	475.1	814.8	292.6		0.359107	-1.47752
A0A024R324	Ras homolog gene family, member A, isoform CRA_a OS=Homo sapiens GN=RHOA PE=3 SV=1	2	133.5	449.7	161.6	RHOA	0.359351	-1.47654
A0A024R7U6	DNA helicase OS=Homo sapiens GN=MCM4 PE=3 SV=1	2	102.1	237.9	85.5	MCM4	0.359395	-1.47636
P07737	Profilin-1 OS=Homo sapiens GN=PFN1 PE=1 SV=2	2	1209.1	2652.4	953.5	PFN1	0.359486	-1.47599
A0A087X020	Ribosome maturation protein SBDS OS=Homo sapiens GN=SBDS PE=1 SV=1	2	7	16.4	5.9		0.359756	-1.47491
Q5JRX3	Presequence protease, mitochondrial OS=Homo sapiens GN=PITRM1 PE=1 SV=3	2	34.7	118.4	42.6	PITRM1	0.359797	-1.47474
V9HW88	Calreticulin, isoform CRA_b OS=Homo sapiens GN=HEL-S-99n PE=2 SV=1	2	1028	3891.8	1400.4	CALR	0.359833	-1.4746
O60701	UDP-glucose 6-dehydrogenase OS=Homo sapiens GN=UGDH PE=1 SV=1	2	468	873.2	315	UGDH	0.360742	-1.47096
Q9Y333	U6 snRNA-associated Sm-like protein LSm2 OS=Homo sapiens GN=LSM2 PE=1 SV=1	2	81	104.4	37.7	LSM2	0.361111	-1.46949
Q8WW35	Tctex1 domain-containing protein 2 OS=Homo sapiens GN=TCTEX1D2 PE=1 SV=2	2	133.6	461.9	166.8	TCTEX1D2	0.361117	-1.46946
P30084	Enoyl-CoA hydratase, mitochondrial OS=Homo sapiens GN=ECHS1 PE=1 SV=4	2	33.2	203.5	73.8	ECHS1	0.362654	-1.46334
Q15293	Reticulocalbin-1 OS=Homo sapiens GN=RCN1 PE=1 SV=1	2	89.6	371.9	135.1	RCN1	0.36327	-1.46089
A0A024RAF1	Bridging integrator 1, isoform CRA_k OS=Homo sapiens GN=BIN1 PE=4 SV=1	2	11.8	36	13.1	BIN1	0.363889	-1.45843
A8K4K9	cDNA FLJ76169 OS=Homo sapiens PE=2 SV=1	1	43.3	120.9	44	EMC2	0.363937	-1.45824
P08240	Signal recognition particle receptor subunit alpha OS=Homo sapiens GN=SRPRA PE=1 SV=2	2	33.4	47.5	17.3	SRPR; SRPRA	0.364211	-1.45716
P27695	DNA-(apurinic or apyrimidinic site) lyase OS=Homo sapiens GN=APEX1 PE=1 SV=2	2	210.1	512.6	186.7	APEX1	0.364222	-1.45711
Q9NZC9	SWI/SNF-related matrix-associated actin-dependent regulator of chromatin subfamily A-like protein 1 OS=Homo sapiens GN=SMARCAL1 PE=1 SV=1	1	23.3	78.5	28.6	SMARCAL1	0.364331	-1.45668
A0A0A0MTJ9	Neutral cholesterol ester hydrolase 1 OS=Homo sapiens GN=NCEH1 PE=1 SV=1	2	39.6	108.4	39.5	NCEH1	0.364391	-1.45644
O94973	AP-2 complex subunit alpha-2 OS=Homo sapiens GN=AP2A2 PE=1 SV=2	2	9	24.4	8.9	AP2A2	0.364754	-1.455
P04406	Glyceraldehyde-3-phosphate dehydrogenase OS=Homo sapiens GN=GAPDH PE=1 SV=3	2	3978.5	6147.1	2242.6	GAPDH	0.364822	-1.45473
O00299	Chloride intracellular channel protein 1 OS=Homo sapiens GN=CLIC1 PE=1 SV=4	2	153.9	341.2	124.5	CLIC1	0.364889	-1.45447
Q6FIG4	RAB1B protein OS=Homo sapiens GN=RAB1B PE=2 SV=1	2	92.8	338.5	123.7	RAB1B	0.365436	-1.45231
A0A024R6Z0	Dynein, cytoplasmic 1, light intermediate chain 2, isoform CRA_a OS=Homo sapiens GN=DYNC1LI2 PE=4 SV=1	2	69.6	171.2	62.6	DYNC1LI2	0.365654	-1.45145
Q16626	Male-enhanced antigen 1 OS=Homo sapiens GN=MEA1 PE=1 SV=2	1	11.2	35.8	13.1	MEA1	0.365922	-1.45039
A0A024R8A0	Rab9 effector protein with kelch motifs isoform 1 OS=Homo sapiens GN=RABEPK PE=2 SV=1	1	12.9	21.3	7.8	RABEPK	0.366197	-1.44931
Q96GG9	DCN1-like protein 1 OS=Homo sapiens GN=DCUN1D1 PE=1 SV=1	1	16.4	36.8	13.5	DCUN1D1	0.366848	-1.44675
Q96AT9	Ribulose-phosphate 3-epimerase OS=Homo sapiens GN=RPE PE=1 SV=1	2	22.7	35.7	13.1	RPE	0.366947	-1.44636
K7ER00	Phenylalanine--tRNA ligase alpha subunit OS=Homo sapiens GN=FARSA PE=1 SV=1	2	48.2	86.5	31.8		0.36763	-1.44367
A0A024RBB7	Nucleosome assembly protein 1-like 1, isoform CRA_a OS=Homo sapiens GN=NAP1L1 PE=3 SV=1	2	149.3	360.1	132.4	NAP1L1	0.367676	-1.44349
Q9HAU5	Regulator of nonsense transcripts 2 OS=Homo sapiens GN=UPF2 PE=1 SV=1	1	20.4	28.8	10.6	UPF2	0.368056	-1.442
Q562L9	Actin-like protein (Fragment) OS=Homo sapiens GN=ACT PE=4 SV=1	2	25.2	73	26.9	ACTG1	0.368493	-1.44029
P27348	14-3-3 protein theta OS=Homo sapiens GN=YWHAQ PE=1 SV=1	2	302	837	308.8	YWHAQ	0.368937	-1.43855
A0A024RAL3	Zinc finger, FYVE domain containing 16, isoform CRA_a OS=Homo sapiens GN=ZFYVE16 PE=4 SV=1	1	7.9	17.6	6.5	ZFYVE16	0.369318	-1.43706
Q9BW92	Threonine--tRNA ligase, mitochondrial OS=Homo sapiens GN=TARS2 PE=1 SV=1	2	13.6	22.2	8.2	TARS2	0.369369	-1.43686
P55786	Puromycin-sensitive aminopeptidase OS=Homo sapiens GN=NPEPPS PE=1 SV=2	2	269.9	727.7	269.1	NPEPPS	0.369795	-1.4352
B2R995	Malic enzyme OS=Homo sapiens PE=2 SV=1	1	15.1	57.3	21.2	ME3	0.369983	-1.43447
Q96CT7	Coiled-coil domain-containing protein 124 OS=Homo sapiens GN=CCDC124 PE=1 SV=1	2	112.3	265.4	98.2	CCDC124	0.370008	-1.43437
D9IAI1	Epididymis secretory protein Li 34 OS=Homo sapiens GN=PEBP1 PE=2 SV=1	2	294.8	781.3	289.3	PEBP1	0.37028	-1.43331
P30626	Sorcin OS=Homo sapiens GN=SRI PE=1 SV=1	2	193	586.7	217.4	SRI	0.370547	-1.43227
V9HWC7	Epididymis secretory sperm binding protein Li 128m OS=Homo sapiens GN=HEL-S-128m PE=2 SV=1	2	235.3	553.4	205.2	PRDX6	0.370799	-1.43129
B4DLV7	Rab GDP dissociation inhibitor OS=Homo sapiens PE=2 SV=1	2	871	1294.7	480.3	GDI2	0.370974	-1.43061
A8K651	cDNA FLJ75700, highly similar to Homo sapiens complement component 1, q subcomponent binding protein (C1QBP), nuclear gene encoding mitochondrial protein, mRNA OS=Homo sapiens PE=2 SV=1	2	93.9	336.3	124.8	C1QBP	0.371097	-1.43013
P67775	Serine/threonine-protein phosphatase 2A catalytic subunit alpha isoform OS=Homo sapiens GN=PPP2CA PE=1 SV=1	2	24.5	38.8	14.4	PPP2CA	0.371134	-1.42999
A8K401	Prohibitin, isoform CRA_a OS=Homo sapiens GN=PHB PE=2 SV=1	2	55.6	201.8	74.9	PHB	0.37116	-1.42989
Q6IAW5	CALU protein OS=Homo sapiens GN=CALU PE=2 SV=1	2	679	3238	1203.1	CALU	0.371557	-1.42835
A0A024R713	Dihydrolipoyl dehydrogenase OS=Homo sapiens GN=DLD PE=3 SV=1	2	15.9	52.7	19.6	DLD	0.371917	-1.42695
Q6FHV6	ENO2 protein OS=Homo sapiens GN=ENO2 PE=1 SV=1	2	107.2	267.9	99.7	ENO2	0.372154	-1.42603
F5GXR3	Parathymosin OS=Homo sapiens GN=PTMS PE=1 SV=1	2	106.3	580.3	216	PTMS	0.372221	-1.42577
A0A0S2Z4R4	Hepatocyte growth factor-regulated tyrosine kinase substrate isoform 1 (Fragment) OS=Homo sapiens GN=HGS PE=2 SV=1	2	152.9	283.4	105.5	HGS	0.372265	-1.4256
B4DMN1	cDNA FLJ61136, highly similar to Ras-related protein Rab-11A OS=Homo sapiens PE=2 SV=1	1	11.3	33.3	12.4	RAB11A	0.372372	-1.42518
P28074	Proteasome subunit beta type-5 OS=Homo sapiens GN=PSMB5 PE=1 SV=3	2	526.4	1420.8	529.2	PSMB5	0.372466	-1.42482
Q9NVT9	Armadillo repeat-containing protein 1 OS=Homo sapiens GN=ARMC1 PE=1 SV=1	1	36.5	73.5	27.4	ARMC1	0.372789	-1.42357
P14550	Alcohol dehydrogenase [NADP(+)] OS=Homo sapiens GN=AKR1A1 PE=1 SV=3	2	15.2	52.3	19.5	AKR1A1	0.372849	-1.42334
P54886	Delta-1-pyrroline-5-carboxylate synthase OS=Homo sapiens GN=ALDH18A1 PE=1 SV=2	2	59.6	174.5	65.1	ALDH18A1	0.373066	-1.4225
Q9H444	Charged multivesicular body protein 4b OS=Homo sapiens GN=CHMP4B PE=1 SV=1	2	37.2	84.7	31.6	CHMP4B	0.373081	-1.42244
Q5VSQ6	Procollagen-proline, 2-oxoglutarate 4-dioxygenase (Proline 4-hydroxylase), alpha polypeptide I variant (Fragment) OS=Homo sapiens GN=P4HA1 PE=2 SV=1	2	44.9	115.2	43	P4HA1	0.373264	-1.42173
E7EMB3	Calmodulin-2 OS=Homo sapiens GN=CALM2 PE=1 SV=1	2	369.1	1184.4	442.2		0.373354	-1.42139
O43681	ATPase ASNA1 OS=Homo sapiens GN=ASNA1 PE=1 SV=2	2	11.6	93.2	34.8	ASNA1	0.373391	-1.42124
Q9NR45	Sialic acid synthase OS=Homo sapiens GN=NANS PE=1 SV=2	2	100.6	247.1	92.4	NANS	0.373938	-1.41913
P25789	Proteasome subunit alpha type-4 OS=Homo sapiens GN=PSMA4 PE=1 SV=1	2	211.4	589.4	220.4	PSMA4	0.37394	-1.41912
B4DS05	cDNA FLJ59403, highly similar to Nucleosome assembly protein 1-like 4 OS=Homo sapiens PE=2 SV=1	2	85.1	242.9	90.9	NAP1L4	0.374228	-1.41801
S4R3E9	NEDD8-MDP1 readthrough OS=Homo sapiens GN=NEDD8-MDP1 PE=4 SV=1	2	93.2	222.5	83.4		0.374831	-1.41569
Q92896	Golgi apparatus protein 1 OS=Homo sapiens GN=GLG1 PE=1 SV=2	2	148.4	388.6	145.8	GLG1	0.375193	-1.4143
E9KL48	Epididymis tissue sperm binding protein Li 18mP OS=Homo sapiens GN=GLUD1 PE=2 SV=1	2	246.7	1042.6	391.8	GLUD1	0.375791	-1.412
E9PAV3	Nascent polypeptide-associated complex subunit alpha, muscle-specific form OS=Homo sapiens GN=NACA PE=1 SV=1	2	62.7	178	67	NACA	0.376404	-1.40964
Q6NUR1	Non-SMC condensin I complex, subunit G OS=Homo sapiens GN=NCAPG PE=2 SV=1	2	216.1	271.8	102.4	NCAPG	0.376748	-1.40833
A8K486	Peptidyl-prolyl cis-trans isomerase OS=Homo sapiens PE=2 SV=1	2	768.6	1741.7	656.4	PPIA	0.376873	-1.40785
Q96TA1	Niban-like protein 1 OS=Homo sapiens GN=FAM129B PE=1 SV=3	2	195.6	391.8	147.8	FAM129B	0.377233	-1.40647
P49841	Glycogen synthase kinase-3 beta OS=Homo sapiens GN=GSK3B PE=1 SV=2	2	10.8	24.9	9.4	GSK3B	0.37751	-1.40541
P19784	Casein kinase II subunit alpha' OS=Homo sapiens GN=CSNK2A2 PE=1 SV=1	2	18.2	35.7	13.5	CSNK2A2	0.378151	-1.40296
O95881	Thioredoxin domain-containing protein 12 OS=Homo sapiens GN=TXNDC12 PE=1 SV=1	1	96.3	271.6	102.8	TXNDC12	0.378498	-1.40164
P10721	Mast/stem cell growth factor receptor Kit OS=Homo sapiens GN=KIT PE=1 SV=1	1	30.8	29.3	11.1	KIT	0.37884	-1.40034
Q5BIX2	Chromosome 18 open reading frame 25, isoform CRA_a OS=Homo sapiens GN=ARKL1 PE=1 SV=1	2	11.6	16.6	6.3	C18orf25	0.379518	-1.39776
P35268	60S ribosomal protein L22 OS=Homo sapiens GN=RPL22 PE=1 SV=2	2	87.9	327.6	124.4	RPL22	0.379731	-1.39695
Q08257	Quinone oxidoreductase OS=Homo sapiens GN=CRYZ PE=1 SV=1	2	51.1	138	52.5	CRYZ	0.380435	-1.39428
F8W6G1	Nuclear receptor-binding protein OS=Homo sapiens GN=NRBP1 PE=1 SV=1	2	23	98.7	37.6	NRBP1	0.380952	-1.39232
Q15181	Inorganic pyrophosphatase OS=Homo sapiens GN=PPA1 PE=1 SV=2	2	24.5	53.8	20.5	PPA1	0.381041	-1.39198
A0A024R2M7	Oxidative-stress responsive 1, isoform CRA_a OS=Homo sapiens GN=OXSR1 PE=4 SV=1	2	78.8	155.8	59.4	OXSR1	0.381258	-1.39116
A0A0S2Z491	Nucleophosmin isoform 2 (Fragment) OS=Homo sapiens GN=NPM1 PE=2 SV=1	2	1023.8	2513.8	958.5	NPM1	0.381295	-1.39102
J3KQ32	Obg-like ATPase 1 OS=Homo sapiens GN=OLA1 PE=1 SV=1	2	573.8	538.1	205.4		0.381713	-1.38944
A4LAA3	Alpha thalassemia/mental retardation syndrome X-linked OS=Homo sapiens GN=ATRX PE=4 SV=1	2	24.3	52.6	20.1	ATRX	0.382129	-1.38787
A0A024R866	Ribosomal protein L35, isoform CRA_a OS=Homo sapiens GN=RPL35 PE=3 SV=1	2	40.8	114.3	43.7	RPL35	0.382327	-1.38712
Q04206	Transcription factor p65 OS=Homo sapiens GN=RELA PE=1 SV=2	2	14.8	28.5	10.9	RELA	0.382456	-1.38663
A0A023T787	RNA-binding protein 8A OS=Homo sapiens GN=RBM8 PE=2 SV=1	2	25.3	57	21.8	RBM8A; LOC101060541	0.382456	-1.38663
Q00796	Sorbitol dehydrogenase OS=Homo sapiens GN=SORD PE=1 SV=4	2	108.4	131.4	50.3	SORD	0.382801	-1.38533
Q8TCX1	Cytoplasmic dynein 2 light intermediate chain 1 OS=Homo sapiens GN=DYNC2LI1 PE=1 SV=1	2	51.9	157	60.1	DYNC2LI1	0.382803	-1.38533
P12268	Inosine-5'-monophosphate dehydrogenase 2 OS=Homo sapiens GN=IMPDH2 PE=1 SV=2	2	724.6	1597.6	611.8	IMPDH2	0.382949	-1.38477
Q59GM9	Alpha-1,4 glucan phosphorylase (Fragment) OS=Homo sapiens PE=2 SV=1	2	803	1493.7	573.7	PYGB	0.38408	-1.38052
Q9BRX8	Redox-regulatory protein FAM213A OS=Homo sapiens GN=FAM213A PE=1 SV=3	2	39.3	173.1	66.5	FAM213A	0.384171	-1.38018
B4E1U9	cDNA FLJ54776, highly similar to Cell division control protein 42 homolog OS=Homo sapiens PE=2 SV=1	2	271.1	844.9	324.6	CDC42	0.384187	-1.38012
B3KRW4	cDNA FLJ34980 fis, clone OCBBF2000522, highly similar to Rab GTPase-binding effector protein 2 OS=Homo sapiens PE=2 SV=1	2	10.4	19	7.3	RABEP2	0.384211	-1.38003
V9HW37	Epididymis secretory protein Li 69 OS=Homo sapiens GN=HEL-S-69 PE=1 SV=1	2	688.6	2694.5	1036.2	CCT5	0.384561	-1.37872
O43776	Asparagine--tRNA ligase, cytoplasmic OS=Homo sapiens GN=NARS PE=1 SV=1	2	450	783	301.3	NARS	0.384802	-1.37781
Q14240	Eukaryotic initiation factor 4A-II OS=Homo sapiens GN=EIF4A2 PE=1 SV=2	2	36.8	98.4	37.9	EIF4A2	0.385163	-1.37646
Q15008	26S proteasome non-ATPase regulatory subunit 6 OS=Homo sapiens GN=PSMD6 PE=1 SV=1	2	134.8	311	120	PSMD6	0.385852	-1.37388
Q96JN8	Neuralized-like protein 4 OS=Homo sapiens GN=NEURL4 PE=1 SV=2	1	10.3	24.1	9.3	NEURL4	0.385892	-1.37373
A6H8X9	Centrosomal protein 170kDa OS=Homo sapiens GN=CEP170 PE=2 SV=1	2	10.6	86.8	33.5	CEP170	0.385945	-1.37353
B2RE46	cDNA, FLJ96923, highly similar to Homo sapiens ribophorin II (RPN2), mRNA OS=Homo sapiens PE=2 SV=1	2	75.3	152.2	58.8	RPN2	0.386334	-1.37208
B4DEA8	cDNA FLJ56425, highly similar to Very-long-chain specific acyl-CoAdehydrogenase, mitochondrial (EC 1.3.99.-) OS=Homo sapiens PE=2 SV=1	2	119.3	515.8	199.4		0.386584	-1.37115
P20042	Eukaryotic translation initiation factor 2 subunit 2 OS=Homo sapiens GN=EIF2S2 PE=1 SV=2	2	140.1	289.4	112	EIF2S2	0.387008	-1.36957
Q9UK45	U6 snRNA-associated Sm-like protein LSm7 OS=Homo sapiens GN=LSM7 PE=1 SV=1	1	9.9	38.5	14.9	LSM7	0.387013	-1.36955
V9HW43	Epididymis secretory protein Li 102 OS=Homo sapiens GN=HEL-S-102 PE=2 SV=1	2	300.2	958.7	371.1	HSPB1	0.387087	-1.36927
Q969H8	Myeloid-derived growth factor OS=Homo sapiens GN=MYDGF PE=1 SV=1	1	166.1	677.4	262.4	C19orf10; MYDGF	0.387363	-1.36824
P61956	Small ubiquitin-related modifier 2 OS=Homo sapiens GN=SUMO2 PE=1 SV=3	1	78.1	298.9	115.8	SUMO2	0.387421	-1.36803
A0A1W2PPS1	Heterogeneous nuclear ribonucleoprotein U OS=Homo sapiens GN=HNRNPU PE=1 SV=1	2	24.1	65.9	25.6		0.388467	-1.36413
B4DT31	cDNA FLJ53425, highly similar to Far upstream element-binding protein 1 OS=Homo sapiens PE=2 SV=1	1	207.5	473.9	184.1	FUBP1	0.388479	-1.36409
A0A140VJY2	Testicular tissue protein Li 209 OS=Homo sapiens PE=2 SV=1	2	52.8	157.5	61.2	TRAP1	0.388571	-1.36375
Q04695	Keratin, type I cytoskeletal 17 OS=Homo sapiens GN=KRT17 PE=1 SV=2	2	14.1	19.3	7.5	KRT17	0.388601	-1.36364
P62081	40S ribosomal protein S7 OS=Homo sapiens GN=RPS7 PE=1 SV=1	2	113.4	310.6	120.7	RPS7	0.388603	-1.36363
P62330	ADP-ribosylation factor 6 OS=Homo sapiens GN=ARF6 PE=1 SV=2	2	39.9	151	58.7	ARF6	0.388742	-1.36312
Q5HYM3	Oxysterol-binding protein OS=Homo sapiens GN=DKFZp686C0249 PE=2 SV=1	2	58	72.5	28.2	OSBPL8	0.388966	-1.36229
A0A024R1A3	Testicular secretory protein Li 63 OS=Homo sapiens GN=UBE1 PE=2 SV=1	2	534.8	1233.4	479.9	UBA1	0.389087	-1.36184
X5CMJ9	Proteasome subunit beta type OS=Homo sapiens GN=PSM8 PE=3 SV=1	2	33.3	135.8	52.9	PSMB8	0.389543	-1.36014
O00193	Small acidic protein OS=Homo sapiens GN=SMAP PE=1 SV=1	2	70	150.1	58.6	C11orf58	0.390406	-1.35695
P30419	Glycylpeptide N-tetradecanoyltransferase 1 OS=Homo sapiens GN=NMT1 PE=1 SV=2	2	203.8	445.1	173.9	NMT1	0.390699	-1.35587
A0A140VK27	Leukotriene A(4) hydrolase OS=Homo sapiens PE=2 SV=1	2	206.5	458.6	179.2	LTA4H	0.390754	-1.35567
P30044	Peroxiredoxin-5, mitochondrial OS=Homo sapiens GN=PRDX5 PE=1 SV=4	2	31.9	105.4	41.2	PRDX5	0.390892	-1.35516
A0A0A1HAW1	H.sapiens ras-related Hrab2 protein OS=Homo sapiens PE=2 SV=1	2	61.4	166.3	65.1	RAB2A	0.391461	-1.35306
O00116	Alkyldihydroxyacetonephosphate synthase, peroxisomal OS=Homo sapiens GN=AGPS PE=1 SV=1	2	25.4	87.6	34.3	AGPS	0.391553	-1.35272
Q96KP4	Cytosolic non-specific dipeptidase OS=Homo sapiens GN=CNDP2 PE=1 SV=2	2	48.7	73.8	28.9	CNDP2	0.391599	-1.35255
Q9H6Z4	Ran-binding protein 3 OS=Homo sapiens GN=RANBP3 PE=1 SV=1	2	8.1	17.1	6.7	RANBP3	0.391813	-1.35176
P32321	Deoxycytidylate deaminase OS=Homo sapiens GN=DCTD PE=1 SV=2	2	30.3	89.5	35.1	DCTD	0.392179	-1.35042
B2R5T2	cDNA, FLJ92608, highly similar to Homo sapiens aldehyde dehydrogenase 1 family, member A3 (ALDH1A3), mRNA OS=Homo sapiens PE=2 SV=1	2	262.9	568.6	223.1	ALDH1A3	0.392367	-1.34972
Q9Y6E3	HSPC027 OS=Homo sapiens PE=2 SV=1	2	94.6	223.8	87.9	PSMD13	0.392761	-1.34827
Q05209	Tyrosine-protein phosphatase non-receptor type 12 OS=Homo sapiens GN=PTPN12 PE=1 SV=3	2	42.1	87.3	34.3	PTPN12	0.392898	-1.34777
A0A0S2Z569	DAZ associated protein 1 isoform 1 (Fragment) OS=Homo sapiens GN=DAZAP1 PE=2 SV=1	1	38.6	126.2	49.6	DAZAP1	0.393027	-1.3473
V9HW26	ATP synthase subunit alpha OS=Homo sapiens GN=HEL-S-123m PE=1 SV=1	2	623.9	2253.8	886.6	ATP5A1	0.39338	-1.346
A0A024R4K3	Malate dehydrogenase OS=Homo sapiens GN=MDH2 PE=2 SV=1	2	185.2	633.3	249.2	MDH2	0.393494	-1.34559
B4DWX3	Importin subunit alpha OS=Homo sapiens PE=2 SV=1	2	55.7	167.3	65.9	KPNA6	0.393903	-1.34409
Q59GY0	Apolipoprotein B mRNA editing enzyme, catalytic polypeptide-like 3C variant (Fragment) OS=Homo sapiens PE=2 SV=1	1	3.6	9.9	3.9	APOBEC3C	0.393939	-1.34395
D3DV26	S100 calcium binding protein A10 (Annexin II ligand, calpactin I, light polypeptide (P11)), isoform CRA_b (Fragment) OS=Homo sapiens GN=S100A10 PE=4 SV=1	2	169	413.2	162.8	S100A10	0.393998	-1.34374
P28070	Proteasome subunit beta type-4 OS=Homo sapiens GN=PSMB4 PE=1 SV=4	2	72.4	226.6	89.3	PSMB4	0.394086	-1.34342
Q5T160	Probable arginine--tRNA ligase, mitochondrial OS=Homo sapiens GN=RARS2 PE=1 SV=1	1	11.5	19.5	7.7	RARS2	0.394872	-1.34054
P25788	Proteasome subunit alpha type-3 OS=Homo sapiens GN=PSMA3 PE=1 SV=2	2	246.8	694.8	274.5	PSMA3	0.395078	-1.33979
V9HW62	Lactoylglutathione lyase OS=Homo sapiens GN=HEL-S-74 PE=2 SV=1	2	186.7	460	181.8	GLO1	0.395217	-1.33928
Q9NP79	Vacuolar protein sorting-associated protein VTA1 homolog OS=Homo sapiens GN=VTA1 PE=1 SV=1	2	105.4	93.6	37	VTA1	0.395299	-1.33898
Q5T0G8	Annexin OS=Homo sapiens GN=ANXA11 PE=1 SV=1	2	300.5	768.5	304	ANXA11	0.395576	-1.33797
P27824	Calnexin OS=Homo sapiens GN=CANX PE=1 SV=2	2	275	876	346.8	CANX	0.39589	-1.33683
Q8NEZ3	WD repeat-containing protein 19 OS=Homo sapiens GN=WDR19 PE=1 SV=2	1	18.7	56.3	22.3	WDR19	0.396092	-1.33609
V9HW31	ATP synthase subunit beta OS=Homo sapiens GN=HEL-S-271 PE=1 SV=1	2	449	1503.9	595.8	ATP5B	0.39617	-1.33581
Q52LJ0	Protein FAM98B OS=Homo sapiens GN=FAM98B PE=1 SV=1	1	171.2	156.2	61.9	FAM98B	0.396287	-1.33538
Q6FHX6	Flap endonuclease 1 OS=Homo sapiens GN=FEN1 PE=2 SV=1	2	32.3	67.6	26.8	FEN1	0.39645	-1.33479
P07954	Fumarate hydratase, mitochondrial OS=Homo sapiens GN=FH PE=1 SV=3	2	88.4	187.7	74.5	FH	0.39691	-1.33312
A0A024RAD5	Dolichyl-diphosphooligosaccharide--protein glycosyltransferase 48 kDa subunit OS=Homo sapiens GN=DDOST PE=3 SV=1	2	63.8	228.3	90.7	DDOST	0.397284	-1.33176
E5KSX8	Mitochondrial transcription factor A OS=Homo sapiens PE=4 SV=1	2	43.9	108.9	43.3	TFAM	0.397612	-1.33057
Q02790	Peptidyl-prolyl cis-trans isomerase FKBP4 OS=Homo sapiens GN=FKBP4 PE=1 SV=3	2	240.6	1808.9	719.9	FKBP4	0.397977	-1.32924
P49720	Proteasome subunit beta type-3 OS=Homo sapiens GN=PSMB3 PE=1 SV=2	2	72.4	201.5	80.2	PSMB3	0.398015	-1.32911
A0A140VJK2	Glycerol-3-phosphate dehydrogenase OS=Homo sapiens PE=2 SV=1	2	32.7	76.1	30.3	GPD2	0.39816	-1.32858
Q14019	Coactosin-like protein OS=Homo sapiens GN=COTL1 PE=1 SV=3	2	93.7	263.3	104.9	COTL1	0.398405	-1.32769
Q9Y4R8	Telomere length regulation protein TEL2 homolog OS=Homo sapiens GN=TELO2 PE=1 SV=2	1	19.5	50.2	20	TELO2	0.398406	-1.32769
V9HWJ1	Glutathione synthetase OS=Homo sapiens GN=HEL-S-64p PE=2 SV=1	2	101.8	140.8	56.1	GSS	0.398438	-1.32757
A5YM53	ITGAV protein OS=Homo sapiens GN=ITGAV PE=2 SV=1	2	27.7	95.1	37.9	ITGAV	0.398528	-1.32725
Q5SW79	Centrosomal protein of 170 kDa OS=Homo sapiens GN=CEP170 PE=1 SV=1	2	891.9	3222.9	1285.2	CEP170	0.398771	-1.32637
Q9UJU6	Drebrin-like protein OS=Homo sapiens GN=DBNL PE=1 SV=1	2	148.8	286.6	114.3	DBNL	0.398814	-1.32621
B5BUB5	Autoantigen La (Fragment) OS=Homo sapiens GN=SSB PE=2 SV=1	2	264.6	944.2	376.6	SSB	0.398856	-1.32606
B3KVH4	cDNA FLJ16549 fis, clone PLACE7003657, highly similar to RAC-alpha serine/threonine-protein kinase (EC 2.7.11.1) OS=Homo sapiens PE=2 SV=1	2	82.1	137.8	55	AKT1	0.399129	-1.32507
P55263	Adenosine kinase OS=Homo sapiens GN=ADK PE=1 SV=2	2	459.6	782.5	312.4	ADK	0.399233	-1.3247
A0A024R9D7	2,4-dienoyl CoA reductase 1, mitochondrial, isoform CRA_b OS=Homo sapiens GN=DECR1 PE=4 SV=1	2	30.7	105.2	42	DECR1	0.39924	-1.32467
Q9BTL3	RNMT-activating mini protein OS=Homo sapiens GN=FAM103A1 PE=1 SV=1	1	30.3	56.6	22.6	FAM103A1	0.399293	-1.32448
A0A140VJM0	Testicular tissue protein Li 96 OS=Homo sapiens PE=2 SV=1	2	297.4	937.7	374.6	ITGA3	0.399488	-1.32378
A0A024RA52	Proteasome subunit alpha type OS=Homo sapiens GN=PSMA2 PE=1 SV=1	2	106.7	302.2	121.2	PSMA2	0.401059	-1.31811
Q9H7D7	WD repeat-containing protein 26 OS=Homo sapiens GN=WDR26 PE=1 SV=3	2	19.3	35.9	14.4	WDR26	0.401114	-1.31792
P09382	Galectin-1 OS=Homo sapiens GN=LGALS1 PE=1 SV=2	2	210	658.8	264.3	LGALS1	0.401184	-1.31766
B2R679	cDNA, FLJ92825, highly similar to Homo sapiens SAR1a gene homolog 1 (S. cerevisiae) (SARA1), mRNA OS=Homo sapiens PE=2 SV=1	2	74.7	206.7	83	SAR1A	0.401548	-1.31636
G9K388	YWHAE/FAM22A fusion protein (Fragment) OS=Homo sapiens GN=YWHAE/FAM22A fusion PE=2 SV=1	2	334.8	764.4	307.5		0.402276	-1.31374
Q53FR4	Vacuolar protein sorting 35 variant (Fragment) OS=Homo sapiens PE=2 SV=1	2	456.7	683.7	275.1	VPS35	0.402369	-1.31341
P55010	Eukaryotic translation initiation factor 5 OS=Homo sapiens GN=EIF5 PE=1 SV=2	2	28.3	50.2	20.2	EIF5	0.40239	-1.31333
B2R4A5	cDNA, FLJ92019, highly similar to Homo sapiens mitochondrial ribosomal protein S14 (MRPS14), nuclear gene encoding mitochondrial protein, mRNA OS=Homo sapiens PE=2 SV=1	2	10.2	14.4	5.8	MRPS14	0.402778	-1.31194
Q96LB3	Intraflagellar transport protein 74 homolog OS=Homo sapiens GN=IFT74 PE=1 SV=1	2	71.2	122.6	49.4	IFT74	0.402936	-1.31138
Q6PN88	Hematopoietic stem/progenitor cell induced protein 2 (Fragment) OS=Homo sapiens PE=2 SV=1	2	14.1	52.3	21.1		0.403442	-1.30957
E9PQY2	Prefoldin subunit 4 OS=Homo sapiens GN=PFDN4 PE=1 SV=1	2	54.3	313.7	126.6		0.40357	-1.30911
P49721	Proteasome subunit beta type-2 OS=Homo sapiens GN=PSMB2 PE=1 SV=1	2	130.1	355.4	143.6	PSMB2	0.404052	-1.30739
B4DJ30	cDNA FLJ61290, highly similar to Neutral alpha-glucosidase AB OS=Homo sapiens PE=2 SV=1	2	683.8	2323.6	938.9		0.404071	-1.30732
Q99471	Prefoldin subunit 5 OS=Homo sapiens GN=PFDN5 PE=1 SV=2	2	82.1	546.4	220.8	PFDN5	0.4041	-1.30722
B7Z268	Single-stranded DNA binding protein 1, isoform CRA_c OS=Homo sapiens GN=SSBP1 PE=2 SV=1	2	36	128.6	52	SSBP1	0.404355	-1.30631
B4DGE7	cDNA FLJ61235, weakly similar to WD repeat protein YBL104C OS=Homo sapiens PE=2 SV=1	1	15.1	26.2	10.6	MIOS	0.40458	-1.3055
A0A0S2Z5J4	Adaptor-related protein complex 3 beta 1 subunit isoform 1 (Fragment) OS=Homo sapiens GN=AP3B1 PE=2 SV=1	2	302.2	590.3	238.9	AP3B1	0.404709	-1.30504
P62495	Eukaryotic peptide chain release factor subunit 1 OS=Homo sapiens GN=ETF1 PE=1 SV=3	2	131.8	246.4	99.8	ETF1	0.405032	-1.30389
A0A024QZK8	Heterogeneous nuclear ribonucleoprotein H3 (2H9), isoform CRA_a OS=Homo sapiens GN=HNRPH3 PE=4 SV=1	2	643.8	1839.4	745.2	HNRNPH3	0.405132	-1.30354
A0A0K0K1K4	Proteasome subunit alpha type OS=Homo sapiens GN=HEL-S-276 PE=2 SV=1	2	111.3	290	117.5	PSMA7	0.405172	-1.30339
B3KY51	cDNA FLJ46863 fis, clone UTERU3011558 OS=Homo sapiens PE=2 SV=1	1	17.2	53.8	21.8	NOA1	0.405204	-1.30328
Q96EB6	NAD-dependent protein deacetylase sirtuin-1 OS=Homo sapiens GN=SIRT1 PE=1 SV=2	2	58.1	109.5	44.4	SIRT1	0.405479	-1.3023
P46109	Crk-like protein OS=Homo sapiens GN=CRKL PE=1 SV=1	2	56.7	91.2	37	CRKL	0.405702	-1.30151
P37802	Transgelin-2 OS=Homo sapiens GN=TAGLN2 PE=1 SV=3	2	355.5	1136.8	461.8	TAGLN2	0.406228	-1.29964
H9ZYJ2	Thioredoxin OS=Homo sapiens GN=TXN PE=2 SV=1	2	600.7	1109.2	450.7	TXN	0.406329	-1.29928
O14920	Inhibitor of nuclear factor kappa-B kinase subunit beta OS=Homo sapiens GN=IKBKB PE=1 SV=1	2	95	129	52.5	IKBKB	0.406977	-1.29698
O75396	Vesicle-trafficking protein SEC22b OS=Homo sapiens GN=SEC22B PE=1 SV=4	2	86.6	211.8	86.2	SEC22B	0.406988	-1.29694
Q6NUL6	PITPNA protein (Fragment) OS=Homo sapiens GN=PITPNA PE=2 SV=1	2	108.5	126.4	51.5	PITPNA	0.407437	-1.29535
B2RDY9	Adenylyl cyclase-associated protein OS=Homo sapiens PE=2 SV=1	2	1215.6	1801.6	734.3	CAP1	0.407582	-1.29484
Q5H9N4	Uncharacterized protein DKFZp686L20222 OS=Homo sapiens GN=DKFZp686L20222 PE=3 SV=1	2	35.8	74.5	30.4	CDK1	0.408054	-1.29317
H7BZJ3	Protein disulfide-isomerase A3 (Fragment) OS=Homo sapiens GN=PDIA3 PE=1 SV=1	2	40.4	82.9	33.9		0.408926	-1.29009
Q969E4	Transcription elongation factor A protein-like 3 OS=Homo sapiens GN=TCEAL3 PE=1 SV=1	2	31.6	55.5	22.7	TCEAL3	0.409009	-1.2898
Q9UJX2	Cell division cycle protein 23 homolog OS=Homo sapiens GN=CDC23 PE=1 SV=3	2	20.5	36.9	15.1	CDC23	0.409214	-1.28907
P05120	Plasminogen activator inhibitor 2 OS=Homo sapiens GN=SERPINB2 PE=1 SV=2	2	392.4	497.7	204	SERPINB2	0.409885	-1.28671
L0R819	Alternative protein ASNSD1 OS=Homo sapiens GN=ASNSD1 PE=1 SV=1	2	43.1	96.6	39.6		0.409938	-1.28652
D3DUW5	Dynamin 1-like, isoform CRA_c OS=Homo sapiens GN=DNM1L PE=3 SV=1	2	238.9	200.5	82.2	DNM1L	0.409975	-1.28639
P62312	U6 snRNA-associated Sm-like protein LSm6 OS=Homo sapiens GN=LSM6 PE=1 SV=1	2	33.1	83.8	34.4	LSM6	0.410501	-1.28454
B4DPZ4	cDNA FLJ60782, highly similar to Rho-GTPase-activating protein 1 OS=Homo sapiens PE=2 SV=1	2	257.4	417.6	171.5	ARHGAP1	0.41068	-1.28391
Q9Y3B2	Exosome complex component CSL4 OS=Homo sapiens GN=EXOSC1 PE=1 SV=1	1	64.5	83.5	34.3	EXOSC1	0.410778	-1.28357
A2A274	Aconitate hydratase, mitochondrial OS=Homo sapiens GN=ACO2 PE=1 SV=1	2	89	284.9	117.1	ACO2	0.411021	-1.28271
Q5SRQ6	Casein kinase II subunit beta OS=Homo sapiens GN=CSNK2B PE=1 SV=2	2	34.9	74.1	30.5	CSNK2B	0.411606	-1.28066
A0A140VJX1	Testicular tissue protein Li 198 OS=Homo sapiens PE=2 SV=1	2	113.4	364.4	150	ACAT1	0.411636	-1.28056
Q16186	Proteasomal ubiquitin receptor ADRM1 OS=Homo sapiens GN=ADRM1 PE=1 SV=2	2	45	131.9	54.3	ADRM1	0.411676	-1.28042
B3KS98	Eukaryotic translation initiation factor 3 subunit H OS=Homo sapiens GN=EIF3S3 PE=1 SV=1	2	152.1	305.9	126	EIF3H	0.411899	-1.27964
A0A024R1K7	Tyrosine 3-monooxygenase/tryptophan 5-monooxygenase activation protein, eta polypeptide, isoform CRA_b OS=Homo sapiens GN=YWHAH PE=3 SV=1	2	239	599.9	247.1	YWHAH	0.411902	-1.27963
Q8WXX5	DnaJ homolog subfamily C member 9 OS=Homo sapiens GN=DNAJC9 PE=1 SV=1	2	35.8	55.1	22.7	DNAJC9	0.411978	-1.27936
Q969T9	WW domain-binding protein 2 OS=Homo sapiens GN=WBP2 PE=1 SV=1	2	103.2	231.8	95.5	WBP2	0.411993	-1.27931
B0FTY2	NudC-like protein OS=Homo sapiens PE=1 SV=1	2	140.6	1377.3	567.5	NUDCD3	0.412038	-1.27915
Q8WW12	PEST proteolytic signal-containing nuclear protein OS=Homo sapiens GN=PCNP PE=1 SV=2	2	165.6	302.8	124.8	PCNP	0.412153	-1.27875
A0A024R8A2	GTPase activating protein and VPS9 domains 1, isoform CRA_d OS=Homo sapiens GN=GAPVD1 PE=4 SV=1	1	23.9	33.7	13.9	GAPVD1	0.412463	-1.27766
O95218	Zinc finger Ran-binding domain-containing protein 2 OS=Homo sapiens GN=ZRANB2 PE=1 SV=2	2	76	199.6	82.4	ZRANB2	0.412826	-1.2764
Q9H2U2	Inorganic pyrophosphatase 2, mitochondrial OS=Homo sapiens GN=PPA2 PE=1 SV=2	2	102.6	357.1	147.5	PPA2	0.41305	-1.27561
P30040	Endoplasmic reticulum resident protein 29 OS=Homo sapiens GN=ERP29 PE=1 SV=4	2	182.7	419.3	173.2	ERP29	0.413069	-1.27554
Q96IZ0	PRKC apoptosis WT1 regulator protein OS=Homo sapiens GN=PAWR PE=1 SV=1	2	171.3	252.7	104.4	PAWR	0.413138	-1.2753
Q16658	Fascin OS=Homo sapiens GN=FSCN1 PE=1 SV=3	2	411.7	749.6	309.8	FSCN1	0.413287	-1.27478
A8K6Q4	cDNA FLJ76888, highly similar to Homo sapiens RNA binding motif protein 6 (RBM6), mRNA OS=Homo sapiens PE=2 SV=1	1	53	173	71.5	RBM6	0.413295	-1.27476
P10155	60 kDa SS-A/Ro ribonucleoprotein OS=Homo sapiens GN=TROVE2 PE=1 SV=2	2	127.7	375.3	155.2	TROVE2	0.413536	-1.27392
O75940	Survival of motor neuron-related-splicing factor 30 OS=Homo sapiens GN=SMNDC1 PE=1 SV=1	1	37.5	70.6	29.2	SMNDC1	0.413598	-1.2737
G3V3D1	Epididymal secretory protein E1 (Fragment) OS=Homo sapiens GN=NPC2 PE=1 SV=1	2	150.7	723.9	299.5		0.413731	-1.27323
A4D2P0	Ras-related C3 botulinum toxin substrate 1 (Rho family, small GTP binding protein Rac1) OS=Homo sapiens GN=RAC1 PE=2 SV=1	2	203.5	468.3	193.8	RAC1	0.413837	-1.27286
A0A087X1N8	Serpin B6 OS=Homo sapiens GN=SERPINB6 PE=1 SV=1	2	43	76.8	31.8	SERPINB6	0.414062	-1.27208
A0A024R4E5	High density lipoprotein binding protein (Vigilin), isoform CRA_a OS=Homo sapiens GN=HDLBP PE=1 SV=1	2	863.1	1351.2	559.5	HDLBP	0.414076	-1.27203
O14929	Histone acetyltransferase type B catalytic subunit OS=Homo sapiens GN=HAT1 PE=1 SV=1	1	137	98.5	40.8	HAT1	0.414213	-1.27155
O75914	Serine/threonine-protein kinase PAK 3 OS=Homo sapiens GN=PAK3 PE=1 SV=2	1	151.5	249.6	103.4	PAK3	0.414263	-1.27138
P05556	Integrin beta-1 OS=Homo sapiens GN=ITGB1 PE=1 SV=2	2	359.8	934.6	387.6	ITGB1	0.414723	-1.26978
P52788	Spermine synthase OS=Homo sapiens GN=SMS PE=1 SV=2	2	164.6	404.9	168	SMS	0.414917	-1.2691
Q9Y6K9	NF-kappa-B essential modulator OS=Homo sapiens GN=IKBKG PE=1 SV=2	2	136.1	275.4	114.4	IKBKG	0.415396	-1.26744
A0A024RC31	KIAA1012, isoform CRA_b OS=Homo sapiens GN=KIAA1012 PE=4 SV=1	1	24.8	47.6	19.8	TRAPPC8	0.415966	-1.26546
Q13451	Peptidyl-prolyl cis-trans isomerase FKBP5 OS=Homo sapiens GN=FKBP5 PE=1 SV=2	2	171.5	1300.3	541.2	FKBP5	0.416212	-1.26461
F1D8R0	Nuclear receptor subfamily 2, group F, member 2, isoform CRA_a OS=Homo sapiens GN=NR2F2 PE=2 SV=1	1	28.3	93.7	39	NR2F2	0.416222	-1.26457
P20618	Proteasome subunit beta type-1 OS=Homo sapiens GN=PSMB1 PE=1 SV=2	2	102.9	323.2	134.6	PSMB1	0.41646	-1.26375
P35613	Basigin OS=Homo sapiens GN=BSG PE=1 SV=2	2	32.4	132.5	55.2	BSG	0.416604	-1.26325
A8K8D9	Glucose-6-phosphate 1-dehydrogenase OS=Homo sapiens PE=2 SV=1	2	169.1	610.5	254.5	G6PD	0.416871	-1.26233
P53597	Succinate--CoA ligase [ADP/GDP-forming] subunit alpha, mitochondrial OS=Homo sapiens GN=SUCLG1 PE=1 SV=4	2	48	115.3	48.1	SUCLG1	0.417173	-1.26128
P78371	T-complex protein 1 subunit beta OS=Homo sapiens GN=CCT2 PE=1 SV=4	2	588.8	2045.1	853.6	CCT2	0.417388	-1.26054
Q8NBS9	Thioredoxin domain-containing protein 5 OS=Homo sapiens GN=TXNDC5 PE=1 SV=2	2	210.3	627	262	TXNDC5	0.417863	-1.2589
F5H5P2	Uncharacterized protein OS=Homo sapiens PE=4 SV=1	2	51.5	140.4	58.7		0.418091	-1.25811
B7Z809	cDNA FLJ56016, highly similar to C-1-tetrahydrofolate synthase, cytoplasmic OS=Homo sapiens PE=2 SV=1	2	731.8	1360.8	569.4	MTHFD1	0.41843	-1.25694
A0A024RAL2	RAS p21 protein activator (GTPase activating protein) 1, isoform CRA_b OS=Homo sapiens GN=RASA1 PE=4 SV=1	2	35.3	79.8	33.4	RASA1	0.418546	-1.25654
Q6ZUT6	Uncharacterized protein C15orf52 OS=Homo sapiens GN=C15orf52 PE=1 SV=1	2	137.7	259.8	108.8	C15orf52	0.418784	-1.25572
P55084	Trifunctional enzyme subunit beta, mitochondrial OS=Homo sapiens GN=HADHB PE=1 SV=3	2	132.4	477.9	200.2	HADHB	0.418916	-1.25527
Q9Y237	Peptidyl-prolyl cis-trans isomerase NIMA-interacting 4 OS=Homo sapiens GN=PIN4 PE=1 SV=1	2	27.7	37.2	15.6	PIN4	0.419355	-1.25376
A8QI98	DIS3 OS=Homo sapiens PE=2 SV=1	2	25.6	39.8	16.7	DIS3	0.419598	-1.25292
B2R6E2	cDNA, FLJ92910, highly similar to Homo sapiens programmed cell death 4 (neoplastic transformation inhibitor) (PDCD4), transcript variant 1, mRNA OS=Homo sapiens PE=2 SV=1	2	56.1	110.6	46.5	PDCD4	0.420434	-1.25005
P51571	Translocon-associated protein subunit delta OS=Homo sapiens GN=SSR4 PE=1 SV=1	2	6.4	21.4	9	SSR4	0.420561	-1.24961
A0A024QZW7	Nucleoporin 153kDa, isoform CRA_a OS=Homo sapiens GN=NUP153 PE=4 SV=1	1	19.1	44.7	18.8	NUP153	0.420582	-1.24954
O75822	Eukaryotic translation initiation factor 3 subunit J OS=Homo sapiens GN=EIF3J PE=1 SV=2	2	61.6	114.1	48	EIF3J	0.420684	-1.24919
P62750	60S ribosomal protein L23a OS=Homo sapiens GN=RPL23A PE=1 SV=1	2	795.7	2412.9	1015.3	RPL23A	0.42078	-1.24886
Q96G03	Phosphoglucomutase-2 OS=Homo sapiens GN=PGM2 PE=1 SV=4	2	90.1	187.9	79.2	PGM2	0.421501	-1.24639
B3KN49	cDNA FLJ13562 fis, clone PLACE1008080, highly similar to Homo sapiens hexamethylene bis-acetamide inducible 1 (HEXIM1), mRNA OS=Homo sapiens PE=2 SV=1	2	73.4	137.7	58.1	HEXIM1	0.421932	-1.24492
P31483	Nucleolysin TIA-1 isoform p40 OS=Homo sapiens GN=TIA1 PE=1 SV=3	2	64.7	183.2	77.3	TIA1	0.421943	-1.24488
Q96GC5	39S ribosomal protein L48, mitochondrial OS=Homo sapiens GN=MRPL48 PE=1 SV=2	2	19.8	72.5	30.6	MRPL48	0.422069	-1.24445
O75964	ATP synthase subunit g, mitochondrial OS=Homo sapiens GN=ATP5L PE=1 SV=3	2	18.4	73.1	30.9	ATP5L	0.422709	-1.24226
Q12797	Aspartyl/asparaginyl beta-hydroxylase OS=Homo sapiens GN=ASPH PE=1 SV=3	2	346.2	1310.6	554.1	ASPH	0.422783	-1.24201
D9YZV5	Tropomyosin 1 (Alpha) isoform 4 OS=Homo sapiens GN=TPM1 PE=3 SV=1	2	142.4	392.5	166	TPM1	0.42293	-1.24151
Q15286	Ras-related protein Rab-35 OS=Homo sapiens GN=RAB35 PE=1 SV=1	2	68.8	165.2	69.9	RAB35	0.423123	-1.24085
Q9BV81	ER membrane protein complex subunit 6 OS=Homo sapiens GN=EMC6 PE=1 SV=1	1	12.3	31.9	13.5	EMC6	0.423197	-1.2406
V9HWB8	Pyruvate kinase OS=Homo sapiens GN=HEL-S-30 PE=1 SV=1	2	3450.9	5900.6	2497.2	PKM	0.423211	-1.24055
O94874	E3 UFM1-protein ligase 1 OS=Homo sapiens GN=UFL1 PE=1 SV=2	2	12	25.5	10.8	UFL1	0.423529	-1.23947
B0YIW6	Archain 1, isoform CRA_a OS=Homo sapiens GN=ARCN1 PE=1 SV=1	2	416.1	811	343.7	ARCN1	0.423798	-1.23855
G3V2U7	Acylphosphatase OS=Homo sapiens GN=ACYP1 PE=1 SV=1	2	18.8	50	21.2	ACYP1	0.424	-1.23786
E5KNY5	Leucine-rich PPR-motif containing OS=Homo sapiens GN=LRPPRC PE=4 SV=1	2	526.5	1761.2	746.8	LRPPRC	0.424029	-1.23776
A1L0T0	Acetolactate synthase-like protein OS=Homo sapiens GN=ILVBL PE=1 SV=2	2	25.9	71.4	30.3	ILVBL	0.42437	-1.23661
Q99497	Protein DJ-1 OS=Homo sapiens GN=PARK7 PE=1 SV=2	2	289.1	606.2	257.3	PARK7	0.424447	-1.23634
E9PI68	Signal peptidase complex subunit 2 OS=Homo sapiens GN=SPCS2 PE=1 SV=1	2	202	504.2	214.1		0.424633	-1.23571
Q53F55	Deoxythymidylate kinase (Thymidylate kinase) variant (Fragment) OS=Homo sapiens PE=2 SV=1	2	12.8	83.6	35.5	DTYMK	0.424641	-1.23568
A0A024RB32	Prostaglandin E synthase 3 (Cytosolic), isoform CRA_a OS=Homo sapiens GN=PTGES3 PE=4 SV=1	2	131.1	660.8	280.7	PTGES3	0.424788	-1.23518
P11279	Lysosome-associated membrane glycoprotein 1 OS=Homo sapiens GN=LAMP1 PE=1 SV=3	2	15.1	53.2	22.6	LAMP1	0.424812	-1.2351
H3BN98	Uncharacterized protein (Fragment) OS=Homo sapiens PE=4 SV=2	2	11.2	24	10.2		0.425	-1.23447
P50990	T-complex protein 1 subunit theta OS=Homo sapiens GN=CCT8 PE=1 SV=4	2	829.6	2900.9	1233.3	CCT8	0.425144	-1.23398
Q6QNY5	UDP-N-acetylglucosamine-2-epimerase / N-acetylmannosamine kinase OS=Homo sapiens GN=GNE PE=2 SV=1	1	30.8	42.8	18.2	GNE	0.425234	-1.23367
P60174	Triosephosphate isomerase OS=Homo sapiens GN=TPI1 PE=1 SV=3	2	603.3	1272.6	541.4	TPI1	0.425428	-1.23301
Q59H77	T-complex protein 1 subunit gamma (Fragment) OS=Homo sapiens PE=2 SV=1	2	637.9	2036.9	868.2	CCT3	0.426236	-1.23028
V9HW12	Epididymis secretory sperm binding protein Li 2a OS=Homo sapiens GN=HEL-S-2a PE=2 SV=1	2	198.1	452.3	192.9	PRDX2	0.426487	-1.22943
Q53GN7	Mitochondrial ribosomal protein S30 variant (Fragment) OS=Homo sapiens PE=2 SV=1	2	40.8	119.3	50.9	MRPS30	0.426655	-1.22886
A0A024R5Z7	Annexin OS=Homo sapiens GN=ANXA2 PE=3 SV=1	2	1565.7	3039.7	1297.8	ANXA2	0.42695	-1.22786
A0A024R2F8	Coiled-coil-helix-coiled-coil-helix domain containing 4, isoform CRA_b OS=Homo sapiens GN=CHCHD4 PE=4 SV=1	2	2.6	19.9	8.5	CHCHD4	0.427136	-1.22723
Q9BYN8	28S ribosomal protein S26, mitochondrial OS=Homo sapiens GN=MRPS26 PE=1 SV=1	2	22.7	71.6	30.6	MRPS26	0.427374	-1.22643
Q9BRK4	Leucine zipper putative tumor suppressor 2 OS=Homo sapiens GN=LZTS2 PE=1 SV=2	1	9.9	15.2	6.5	LZTS2	0.427632	-1.22556
F8VYN9	ADP-ribosylation factor-like protein 1 OS=Homo sapiens GN=ARL1 PE=1 SV=1	2	3.6	15.9	6.8		0.427673	-1.22542
E9KL44	Epididymis tissue sperm binding protein Li 14m OS=Homo sapiens PE=2 SV=1	2	158.4	533.3	228.1	HADHA	0.427714	-1.22528
B2R9K8	cDNA, FLJ94440, highly similar to Homo sapiens chaperonin containing TCP1, subunit 6A (zeta 1)(CCT6A), mRNA OS=Homo sapiens PE=2 SV=1	2	470.1	1530.6	654.7	CCT6A	0.427741	-1.22519
Q13011	Delta(3,5)-Delta(2,4)-dienoyl-CoA isomerase, mitochondrial OS=Homo sapiens GN=ECH1 PE=1 SV=2	2	12.8	38.1	16.3	ECH1	0.427822	-1.22492
Q9C0B0	RING finger protein unkempt homolog OS=Homo sapiens GN=UNK PE=1 SV=2	1	16.1	24.3	10.4	UNK	0.427984	-1.22437
C9K0J5	Ras association (RalGDS/AF-6) and pleckstrin homology domains 1, isoform CRA_b OS=Homo sapiens GN=RAPH1 PE=1 SV=1	1	20.7	39.7	17	RAPH1	0.428212	-1.2236
M0QZR4	Rho guanine nucleotide exchange factor 1 OS=Homo sapiens GN=ARHGEF1 PE=1 SV=1	2	49.8	73.5	31.5		0.428571	-1.22239
P18031	Tyrosine-protein phosphatase non-receptor type 1 OS=Homo sapiens GN=PTPN1 PE=1 SV=1	2	70.6	99.1	42.5	PTPN1	0.42886	-1.22142
B4DQL5	cDNA FLJ52245, highly similar to Homo sapiens estrogen-related receptor beta like 1 (ESRRBL1), mRNA OS=Homo sapiens PE=2 SV=1	2	7.8	15.6	6.7	IFT57	0.429487	-1.21931
E5RGQ3	RWD domain-containing protein 1 (Fragment) OS=Homo sapiens GN=RWDD1 PE=1 SV=1	2	109.5	175.5	75.4		0.42963	-1.21883
Q5U0I6	H.sapiens ras-related Hrab1A protein OS=Homo sapiens GN=RAB1A PE=2 SV=1	2	167.3	455.5	195.7	RAB1A	0.429638	-1.21881
Q6ZSZ5	Rho guanine nucleotide exchange factor 18 OS=Homo sapiens GN=ARHGEF18 PE=1 SV=3	1	17.7	40.7	17.5	ARHGEF18	0.429975	-1.21767
Q01469	Fatty acid-binding protein, epidermal OS=Homo sapiens GN=FABP5 PE=1 SV=3	2	60.3	126.5	54.4	FABP5	0.43004	-1.21746
Q9BX10	GTP-binding protein 2 OS=Homo sapiens GN=GTPBP2 PE=1 SV=1	1	6.4	8.6	3.7	GTPBP2	0.430233	-1.21681
D6RFF8	Glucosamine-6-phosphate isomerase (Fragment) OS=Homo sapiens GN=GNPDA1 PE=1 SV=1	2	12.4	33	14.2		0.430303	-1.21658
P80723	Brain acid soluble protein 1 OS=Homo sapiens GN=BASP1 PE=1 SV=2	2	194	748.4	322.1	BASP1	0.430385	-1.2163
Q99623	Prohibitin-2 OS=Homo sapiens GN=PHB2 PE=1 SV=2	2	173.2	544.3	234.3	PHB2	0.430461	-1.21605
P25786	Proteasome subunit alpha type-1 OS=Homo sapiens GN=PSMA1 PE=1 SV=1	2	464.6	1138.5	490.7	PSMA1	0.431006	-1.21422
A8K4S9	Signal transducer and activator of transcription OS=Homo sapiens PE=2 SV=1	2	111.6	167.7	72.3	STAT6	0.431127	-1.21382
A0A087WY85	Ubiquitin-conjugating enzyme E2 D3 OS=Homo sapiens GN=UBE2D3 PE=1 SV=1	2	623	351.5	151.6		0.431294	-1.21325
P62277	40S ribosomal protein S13 OS=Homo sapiens GN=RPS13 PE=1 SV=2	2	365.1	1019.7	440.3	RPS13	0.431794	-1.21159
Q9UBB4	Ataxin-10 OS=Homo sapiens GN=ATXN10 PE=1 SV=1	2	52	84.5	36.5	ATXN10	0.431953	-1.21105
Q7L4Q3	Glutathione peroxidase OS=Homo sapiens GN=GPX1 PE=2 SV=1	1	16.7	50.4	21.8	GPX1	0.43254	-1.2091
P48201	ATP synthase F(0) complex subunit C3, mitochondrial OS=Homo sapiens GN=ATP5G3 PE=2 SV=1	1	25	62.4	27	ATP5G3	0.432692	-1.20859
Q9UJ68	Mitochondrial peptide methionine sulfoxide reductase OS=Homo sapiens GN=MSRA PE=1 SV=1	2	34.1	86.2	37.3	MSRA	0.432715	-1.20851
A0A0A0MRI2	Sorting nexin OS=Homo sapiens GN=SNX6 PE=1 SV=1	2	33.1	59.6	25.8	SNX6	0.432886	-1.20794
Q9H2G2	STE20-like serine/threonine-protein kinase OS=Homo sapiens GN=SLK PE=1 SV=1	2	479.6	673.6	291.6	SLK	0.432898	-1.2079
A0A0A0MSW4	Phosphatidylinositol transfer protein beta isoform OS=Homo sapiens GN=PITPNB PE=1 SV=1	2	157.5	88	38.1		0.432955	-1.20771
P16152	Carbonyl reductase [NADPH] 1 OS=Homo sapiens GN=CBR1 PE=1 SV=3	2	100.1	227.4	98.5	CBR1; SETD4	0.433157	-1.20704
Q5U5J2	CSNK2A1 protein OS=Homo sapiens GN=CSNK2A1 PE=1 SV=1	2	113.4	264.4	114.6	CSNK2A1	0.433434	-1.20612
O43252	Bifunctional 3'-phosphoadenosine 5'-phosphosulfate synthase 1 OS=Homo sapiens GN=PAPSS1 PE=1 SV=2	2	169.4	287	124.5	PAPSS1	0.433798	-1.2049
B7Z3K9	Fructose-bisphosphate aldolase OS=Homo sapiens PE=2 SV=1	1	65.2	124.7	54.1	ALDOC	0.433841	-1.20476
B5ME19	Eukaryotic translation initiation factor 3 subunit C-like protein OS=Homo sapiens GN=EIF3CL PE=3 SV=1	2	489.8	949.9	412.9	EIF3CL	0.434677	-1.20198
Q02952	A-kinase anchor protein 12 OS=Homo sapiens GN=AKAP12 PE=1 SV=4	2	52.7	117	50.9	AKAP12	0.435043	-1.20077
Q16270	Insulin-like growth factor-binding protein 7 OS=Homo sapiens GN=IGFBP7 PE=1 SV=1	2	99.4	551.1	239.8	IGFBP7	0.43513	-1.20048
A4D0U5	Testis derived transcript (3 LIM domains) OS=Homo sapiens GN=TES PE=4 SV=1	2	137.3	256.6	111.7	TES	0.435308	-1.19989
O15260	Surfeit locus protein 4 OS=Homo sapiens GN=SURF4 PE=1 SV=3	2	25.8	80.4	35	SURF4	0.435323	-1.19984
Q6FG93	HCG34604, isoform CRA_c OS=Homo sapiens GN=VAMP5 PE=2 SV=1	2	6.3	18.6	8.1	VAMP5	0.435484	-1.19931
A0A024QZY4	Tripartite motif-containing 38, isoform CRA_a OS=Homo sapiens GN=TRIM38 PE=4 SV=1	2	6.9	39.7	17.3	TRIM38	0.435768	-1.19837
Q5TID7	Coiled-coil domain-containing protein 181 OS=Homo sapiens GN=CCDC181 PE=2 SV=1	1	125.5	173.9	75.8	C1orf114; CCDC181	0.435883	-1.19799
Q9BRP1	Programmed cell death protein 2-like OS=Homo sapiens GN=PDCD2L PE=1 SV=1	1	102.8	75.7	33	PDCD2L	0.435931	-1.19783
Q5U0F4	Eukaryotic translation initiation factor 3 subunit I OS=Homo sapiens GN=EIF3S2 PE=2 SV=1	2	311.9	528.5	230.5	EIF3I	0.43614	-1.19714
O14602	Eukaryotic translation initiation factor 1A, Y-chromosomal OS=Homo sapiens GN=EIF1AY PE=1 SV=4	1	291	367.9	160.5	EIF1AY	0.43626	-1.19674
P61962	DDB1- and CUL4-associated factor 7 OS=Homo sapiens GN=DCAF7 PE=1 SV=1	1	12.9	29.1	12.7	DCAF7	0.436426	-1.19619
Q59FR8	Galectin (Fragment) OS=Homo sapiens PE=2 SV=1	2	60.8	229.8	100.3	LGALS3	0.436466	-1.19606
Q9HCC0	Methylcrotonoyl-CoA carboxylase beta chain, mitochondrial OS=Homo sapiens GN=MCCC2 PE=1 SV=1	2	35.1	95.3	41.6	MCCC2	0.436516	-1.19589
A0A0C4DG17	40S ribosomal protein SA OS=Homo sapiens GN=RPSA PE=1 SV=1	2	532.1	1448.1	632.5	RPSA	0.436779	-1.19502
Q59GV6	Zinedin variant (Fragment) OS=Homo sapiens PE=2 SV=1	1	18.8	26.1	11.4	STRN4	0.436782	-1.19502
Q14376	UDP-glucose 4-epimerase OS=Homo sapiens GN=GALE PE=1 SV=2	2	100.1	168	73.4	GALE	0.436905	-1.19461
Q15714	TSC22 domain family protein 1 OS=Homo sapiens GN=TSC22D1 PE=1 SV=3	2	12.6	68.2	29.8	TSC22D1	0.43695	-1.19446
A0A024R994	Copine III, isoform CRA_a OS=Homo sapiens GN=CPNE3 PE=4 SV=1	2	747.1	827.9	361.8	CPNE3	0.437009	-1.19426
Q53GE7	Tetratricopeptide repeat domain 1 variant (Fragment) OS=Homo sapiens PE=2 SV=1	2	78.8	300.9	131.6	TTC1	0.437355	-1.19312
Q58FF6	Putative heat shock protein HSP 90-beta 4 OS=Homo sapiens GN=HSP90AB4P PE=5 SV=1	1	45.1	561	245.4	HSP90AB4P	0.437433	-1.19287
Q8ND30	Liprin-beta-2 OS=Homo sapiens GN=PPFIBP2 PE=1 SV=3	1	8.6	22.4	9.8	PPFIBP2	0.4375	-1.19265
P43034	Platelet-activating factor acetylhydrolase IB subunit alpha OS=Homo sapiens GN=PAFAH1B1 PE=1 SV=2	2	97.1	157.9	69.1	PAFAH1B1	0.437619	-1.19225
A0A140VJT8	Testicular tissue protein Li 164 OS=Homo sapiens PE=2 SV=1	2	234.7	528.7	231.4	RNH1	0.437677	-1.19206
O14737	Programmed cell death protein 5 OS=Homo sapiens GN=PDCD5 PE=1 SV=3	2	130.3	343.4	150.3	PDCD5	0.437682	-1.19205
P49458	Signal recognition particle 9 kDa protein OS=Homo sapiens GN=SRP9 PE=1 SV=2	2	100.9	297	130	SRP9; SRP9P1	0.43771	-1.19195
B7Z8Q2	cDNA FLJ55606, highly similar to Alpha-2-HS-glycoprotein OS=Homo sapiens PE=2 SV=1	2	98.8	281.9	123.4	AHSG	0.437744	-1.19184
Q86UK7	E3 ubiquitin-protein ligase ZNF598 OS=Homo sapiens GN=ZNF598 PE=1 SV=1	2	57.2	102.1	44.7	ZNF598	0.437806	-1.19164
B5ME97	Septin 10, isoform CRA_c OS=Homo sapiens GN=SEPT10 PE=1 SV=2	2	67.1	75.8	33.2	SEPT10	0.437995	-1.19101
O00151	PDZ and LIM domain protein 1 OS=Homo sapiens GN=PDLIM1 PE=1 SV=4	2	58	163.5	71.7	PDLIM1	0.438532	-1.18925
P51572	B-cell receptor-associated protein 31 OS=Homo sapiens GN=BCAP31 PE=1 SV=3	2	42.9	111	48.7	BCAP31	0.438739	-1.18857
A0A024R845	RAB14, member RAS oncogene family, isoform CRA_a OS=Homo sapiens GN=RAB14 PE=4 SV=1	2	48.3	93.6	41.1	RAB14	0.439103	-1.18737
Q6NVY1	3-hydroxyisobutyryl-CoA hydrolase, mitochondrial OS=Homo sapiens GN=HIBCH PE=1 SV=2	2	9.5	69.4	30.5	HIBCH	0.439481	-1.18613
Q9NSE4	Isoleucine--tRNA ligase, mitochondrial OS=Homo sapiens GN=IARS2 PE=1 SV=2	2	96.7	382	167.9	IARS2	0.439529	-1.18597
P48047	ATP synthase subunit O, mitochondrial OS=Homo sapiens GN=ATP5O PE=1 SV=1	2	6.1	26.6	11.7	ATP5O	0.43985	-1.18492
A0A024RDN1	Intraflagellar transport 88 homolog (Chlamydomonas), isoform CRA_d OS=Homo sapiens GN=IFT88 PE=4 SV=1	1	22.3	46.6	20.5	IFT88	0.439914	-1.18471
D6RFG8	Deoxycytidine kinase OS=Homo sapiens GN=DCK PE=1 SV=1	2	49.7	110.4	48.6		0.440217	-1.18371
M0R0P8	Unconventional myosin-IXb OS=Homo sapiens GN=MYO9B PE=1 SV=1	2	62.8	100.8	44.4		0.440476	-1.18286
O14907	Tax1-binding protein 3 OS=Homo sapiens GN=TAX1BP3 PE=1 SV=2	1	16.2	23.8	10.5	TAX1BP3	0.441176	-1.18057
P78357	Contactin-associated protein 1 OS=Homo sapiens GN=CNTNAP1 PE=1 SV=1	1	14.6	40.5	17.9	CNTNAP1	0.441975	-1.17796
A0A0A0MT83	Isovaleryl-CoA dehydrogenase, mitochondrial OS=Homo sapiens GN=IVD PE=1 SV=1	2	12.8	54.3	24	IVD	0.441989	-1.17792
P30101	Protein disulfide-isomerase A3 OS=Homo sapiens GN=PDIA3 PE=1 SV=4	2	313.2	930.5	411.3	PDIA3	0.44202	-1.17782
P34932	Heat shock 70 kDa protein 4 OS=Homo sapiens GN=HSPA4 PE=1 SV=4	2	973.5	3870.3	1710.8	HSPA4	0.442033	-1.17777
A0A0G2JL56	HLA class I histocompatibility antigen, A-3 alpha chain OS=Homo sapiens GN=HLA-A PE=1 SV=1	2	55.3	172.8	76.4		0.44213	-1.17746
A4QPB0	IQ motif containing GTPase activating protein 1 OS=Homo sapiens GN=IQGAP1 PE=1 SV=1	2	2066.6	3251.8	1437.8	IQGAP1	0.442155	-1.17738
A0A0F7NGI8	Leucine rich repeat (In FLII) interacting protein 1, isoform CRA_c OS=Homo sapiens GN=LRRFIP1 PE=2 SV=1	2	280.9	439.3	194.3	LRRFIP1	0.442295	-1.17692
P21291	Cysteine and glycine-rich protein 1 OS=Homo sapiens GN=CSRP1 PE=1 SV=3	2	320.4	535	236.7	CSRP1	0.44243	-1.17648
Q6FI00	CCND1 protein OS=Homo sapiens GN=CCND1 PE=2 SV=1	2	21.2	62.5	27.7	CCND1	0.4432	-1.17397
Q8IZ83	Aldehyde dehydrogenase family 16 member A1 OS=Homo sapiens GN=ALDH16A1 PE=1 SV=2	2	196.3	308.8	137	ALDH16A1	0.443653	-1.1725
E9PAU2	Ribonucleoprotein PTB-binding 1 OS=Homo sapiens GN=RAVER1 PE=1 SV=1	1	65.3	86.1	38.2	RAVER1	0.44367	-1.17244
B3KMV5	cDNA FLJ12728 fis, clone NT2RP2000040, highly similar to Protein FAM62A OS=Homo sapiens PE=2 SV=1	2	292.6	444.5	197.3	ESYT1	0.44387	-1.17179
P11717	Cation-independent mannose-6-phosphate receptor OS=Homo sapiens GN=IGF2R PE=1 SV=3	2	36.5	103.4	45.9	IGF2R	0.443907	-1.17167
Q09666	Neuroblast differentiation-associated protein AHNAK OS=Homo sapiens GN=AHNAK PE=1 SV=2	2	6271.3	9240.7	4106.1	AHNAK	0.444349	-1.17023
Q9UHB9	Signal recognition particle subunit SRP68 OS=Homo sapiens GN=SRP68 PE=1 SV=2	2	78	161.5	71.8	SRP68	0.444582	-1.16948
B2RAH5	cDNA, FLJ94919, highly similar to Homo sapiens protein phosphatase 1, regulatory (inhibitor) subunit 12A (PPP1R12A), mRNA OS=Homo sapiens PE=2 SV=1	2	306.4	490	218.1	PPP1R12A	0.445102	-1.16779
P08238	Heat shock protein HSP 90-beta OS=Homo sapiens GN=HSP90AB1 PE=1 SV=4	2	2616.7	14640.2	6517.5	HSP90AB1	0.445178	-1.16754
B5BUB1	RuvB-like helicase (Fragment) OS=Homo sapiens GN=RUVBL1 PE=2 SV=1	2	205	656.6	292.5	RUVBL1	0.445477	-1.16658
E9PKC0	Pleckstrin homology domain-containing family A member 7 OS=Homo sapiens GN=PLEKHA7 PE=1 SV=1	1	73.6	114.4	51	PLEKHA7	0.445804	-1.16552
A0A087X0X3	Heterogeneous nuclear ribonucleoprotein M OS=Homo sapiens GN=HNRNPM PE=1 SV=1	2	977.2	1550.9	691.4		0.445806	-1.16551
O75340	Programmed cell death protein 6 OS=Homo sapiens GN=PDCD6 PE=1 SV=1	2	111.6	271.6	121.1	PDCD6	0.445876	-1.16528
P61020	Ras-related protein Rab-5B OS=Homo sapiens GN=RAB5B PE=1 SV=1	2	38	105.6	47.1	RAB5B	0.446023	-1.16481
Q16881	Thioredoxin reductase 1, cytoplasmic OS=Homo sapiens GN=TXNRD1 PE=1 SV=3	2	505	741.6	330.8	TXNRD1	0.446063	-1.16468
E9PCR7	2-oxoglutarate dehydrogenase, mitochondrial OS=Homo sapiens GN=OGDH PE=1 SV=1	2	45.3	115.4	51.5	OGDH	0.446274	-1.164
P21281	V-type proton ATPase subunit B, brain isoform OS=Homo sapiens GN=ATP6V1B2 PE=1 SV=3	2	112.3	170.5	76.1	ATP6V1B2	0.446334	-1.1638
O75821	Eukaryotic translation initiation factor 3 subunit G OS=Homo sapiens GN=EIF3G PE=1 SV=2	2	79.5	176.2	78.7	EIF3G	0.446652	-1.16278
J3KR97	Tubulin-specific chaperone D OS=Homo sapiens GN=TBCD PE=1 SV=1	2	57.3	121.1	54.1	TBCD	0.446738	-1.1625
Q59FF0	EBNA-2 co-activator variant (Fragment) OS=Homo sapiens PE=2 SV=1	2	627.2	1320.1	589.9	SND1	0.44686	-1.1621
P62273	40S ribosomal protein S29 OS=Homo sapiens GN=RPS29 PE=1 SV=2	2	41.4	131.1	58.6	RPS29	0.446987	-1.1617
P11177	Pyruvate dehydrogenase E1 component subunit beta, mitochondrial OS=Homo sapiens GN=PDHB PE=1 SV=3	2	87.4	236.9	105.9	PDHB	0.447024	-1.16158
G3V0E4	Mitochondrial-processing peptidase subunit beta OS=Homo sapiens GN=PMPCB PE=1 SV=1	2	45.5	114.7	51.3	PMPCB	0.447254	-1.16083
A8K3B6	Tyrosine-protein kinase OS=Homo sapiens PE=2 SV=1	2	81.7	110.4	49.4	CSK	0.447464	-1.16016
B4DLN1	cDNA FLJ60124, highly similar to Mitochondrial dicarboxylate carrier OS=Homo sapiens PE=2 SV=1	2	65.4	189.7	84.9		0.447549	-1.15988
Q460N5	Poly [ADP-ribose] polymerase 14 OS=Homo sapiens GN=PARP14 PE=1 SV=3	1	55.6	119.3	53.4	PARP14	0.447611	-1.15968
A8KAQ3	Sortilin OS=Homo sapiens PE=2 SV=1	2	99.5	325.5	145.7	SORT1	0.447619	-1.15966
A0A0A0MR39	Myelin expression factor 2 OS=Homo sapiens GN=MYEF2 PE=1 SV=1	2	46.9	80.2	35.9	MYEF2	0.447631	-1.15962
P04040	Catalase OS=Homo sapiens GN=CAT PE=1 SV=3	2	105.1	234.5	105	CAT	0.447761	-1.1592
Q59FB9	Toll interacting protein variant (Fragment) OS=Homo sapiens PE=2 SV=1	2	73.7	194.8	87.3	TOLLIP	0.448152	-1.15794
B4DGG0	cDNA FLJ58989, moderately similar to ADP-ribosylation factor-like protein 2 OS=Homo sapiens PE=2 SV=1	2	66.2	160.2	71.8	ARL2	0.44819	-1.15782
B3KXY9	cDNA FLJ46359 fis, clone TESTI4049786, highly similar to Hexokinase-1 (EC 2.7.1.1) OS=Homo sapiens PE=2 SV=1	2	356.5	726.6	325.7	HK1	0.448252	-1.15762
Q8WXF1	Paraspeckle component 1 OS=Homo sapiens GN=PSPC1 PE=1 SV=1	2	274.6	478.3	214.4	PSPC1	0.448254	-1.15761
A0A024R8R4	Nuclear protein localization 4 homolog (S. cerevisiae), isoform CRA_a OS=Homo sapiens GN=NPLOC4 PE=4 SV=1	2	359.7	487	218.3	NPLOC4	0.448255	-1.15761
Q53GF0	Cytidine 5'-monophosphate N-acetylneuraminic acid synthetase variant (Fragment) OS=Homo sapiens PE=2 SV=1	2	52.9	95.7	42.9	CMAS	0.448276	-1.15754
P20073	Annexin A7 OS=Homo sapiens GN=ANXA7 PE=1 SV=3	2	385.3	734.1	329.1	ANXA7	0.448304	-1.15745
A0A140VK07	Testicular secretory protein Li 7 OS=Homo sapiens PE=2 SV=1	2	497.4	742.3	332.8	DPYSL3	0.448336	-1.15735
I6NLS4	Phosphodiesterase OS=Homo sapiens PE=2 SV=1	1	15.1	22.5	10.1	PDE5A	0.448889	-1.15557
Q53HV2	Chaperonin containing TCP1, subunit 7 (Eta) variant (Fragment) OS=Homo sapiens PE=2 SV=1	2	912	2441.4	1096.1	CCT7	0.448964	-1.15533
B0YJ88	Radixin OS=Homo sapiens GN=RDX PE=2 SV=1	2	243.8	417.4	187.4	RDX	0.44897	-1.15531
Q9NXS2	Glutaminyl-peptide cyclotransferase-like protein OS=Homo sapiens GN=QPCTL PE=1 SV=2	1	12.9	23.6	10.6	QPCTL	0.449153	-1.15472
P61204	ADP-ribosylation factor 3 OS=Homo sapiens GN=ARF3 PE=1 SV=2	2	258.1	512.4	230.3	ARF3	0.449454	-1.15376
A0A0S2Z4J1	Hydroxysteroid (17-beta) dehydrogenase 4, isoform CRA_b (Fragment) OS=Homo sapiens GN=HSD17B4 PE=2 SV=1	2	113.7	242.5	109.1	HSD17B4	0.449897	-1.15233
O14976	Cyclin-G-associated kinase OS=Homo sapiens GN=GAK PE=1 SV=2	2	47	71.1	32	GAK	0.45007	-1.15178
P46977	Dolichyl-diphosphooligosaccharide--protein glycosyltransferase subunit STT3A OS=Homo sapiens GN=STT3A PE=1 SV=2	2	73.6	177.5	79.9	STT3A	0.450141	-1.15155
Q14566	DNA replication licensing factor MCM6 OS=Homo sapiens GN=MCM6 PE=1 SV=1	2	173.4	315.2	141.9	MCM6	0.45019	-1.15139
A8K7Q1	cDNA FLJ77770, highly similar to Homo sapiens nucleobindin 1 (NUCB1), mRNA OS=Homo sapiens PE=2 SV=1	2	85.9	284.1	127.9	NUCB1	0.450194	-1.15138
Q9NZN4	EH domain-containing protein 2 OS=Homo sapiens GN=EHD2 PE=1 SV=2	2	47.2	110.6	49.8	EHD2	0.450271	-1.15113
J9JIE6	Calcium load-activated calcium channel OS=Homo sapiens GN=TMCO1 PE=1 SV=1	2	27.6	52.6	23.7	TMCO1	0.45057	-1.15018
Q9UNE7	E3 ubiquitin-protein ligase CHIP OS=Homo sapiens GN=STUB1 PE=1 SV=2	2	62	276.7	124.7	STUB1	0.450669	-1.14986
Q9H788	SH2 domain-containing protein 4A OS=Homo sapiens GN=SH2D4A PE=1 SV=1	2	8.9	21.3	9.6	SH2D4A	0.450704	-1.14975
P08134	Rho-related GTP-binding protein RhoC OS=Homo sapiens GN=RHOC PE=1 SV=1	2	10.4	31.7	14.3	RHOC	0.451104	-1.14847
P61163	Alpha-centractin OS=Homo sapiens GN=ACTR1A PE=1 SV=1	2	409.9	628	283.3	ACTR1A	0.451115	-1.14843
P40123	Adenylyl cyclase-associated protein 2 OS=Homo sapiens GN=CAP2 PE=1 SV=1	2	67.6	119.9	54.1	CAP2	0.451209	-1.14813
B3KQQ3	cDNA PSEC0016 fis, clone NT2RM1001076, highly similar to Procollagen-lysine,2-oxoglutarate 5-dioxygenase 3 (EC 1.14.11.4) OS=Homo sapiens PE=2 SV=1	2	27.4	71.8	32.4	PLOD3	0.451253	-1.14799
A0A087WXL6	Vacuolar protein sorting 11 (Yeast), isoform CRA_a OS=Homo sapiens GN=VPS11 PE=1 SV=1	2	94.4	189.1	85.4	VPS11	0.451613	-1.14684
Q53GW1	Vesicle transport-related protein isoform a variant (Fragment) OS=Homo sapiens PE=2 SV=1	2	11.7	28.1	12.7	SCFD1	0.451957	-1.14574
Q96HQ2	CDKN2AIP N-terminal-like protein OS=Homo sapiens GN=CDKN2AIPNL PE=1 SV=1	2	22.5	29.2	13.2	CDKN2AIPNL	0.452055	-1.14543
Q92905	COP9 signalosome complex subunit 5 OS=Homo sapiens GN=COPS5 PE=1 SV=4	2	212.6	284.1	128.7	COPS5	0.45301	-1.14239
Q9Y2Z0	Protein SGT1 homolog OS=Homo sapiens GN=SUGT1 PE=1 SV=3	2	273.6	1347.3	610.4	SUGT1	0.453054	-1.14224
P55884	Eukaryotic translation initiation factor 3 subunit B OS=Homo sapiens GN=EIF3B PE=1 SV=3	2	288.3	447.9	203.2	EIF3B	0.453673	-1.14028
Q92890	Ubiquitin recognition factor in ER-associated degradation protein 1 OS=Homo sapiens GN=UFD1 PE=1 SV=3	2	122.8	177.4	80.5	UFD1L; UFD1	0.453777	-1.13995
E5KQF6	Glucocorticoid receptor OS=Homo sapiens GN=NR3C1 PE=3 SV=1	2	158.3	362.7	164.7	NR3C1	0.454094	-1.13894
Q5HYL6	Uncharacterized protein DKFZp686E1899 OS=Homo sapiens GN=DKFZp686E1899 PE=2 SV=1	2	69.8	138.9	63.1	TMOD3	0.454284	-1.13833
Q59EF6	Calpain 2, large [catalytic] subunit variant (Fragment) OS=Homo sapiens PE=2 SV=1	2	665.8	1090.5	495.6	CAPN2	0.45447	-1.13774
A0A087WY31	YTH domain-containing family protein 3 OS=Homo sapiens GN=YTHDF3 PE=1 SV=1	2	426.7	882.7	401.2	YTHDF3	0.454515	-1.1376
P18085	ADP-ribosylation factor 4 OS=Homo sapiens GN=ARF4 PE=1 SV=3	2	559	1335.6	607.2	ARF4	0.454627	-1.13724
B3KNS8	cDNA FLJ30322 fis, clone BRACE2006703, highly similar to Surfeit locus protein 6 OS=Homo sapiens PE=2 SV=1	1	43.5	98.3	44.7	SURF6	0.45473	-1.13692
O00139	Kinesin-like protein KIF2A OS=Homo sapiens GN=KIF2A PE=1 SV=3	2	105.7	215.4	98	KIF2A	0.454968	-1.13616
O00233	26S proteasome non-ATPase regulatory subunit 9 OS=Homo sapiens GN=PSMD9 PE=1 SV=3	2	94.8	124.5	56.7	PSMD9	0.455422	-1.13473
A8K0M6	cDNA FLJ76697 OS=Homo sapiens PE=2 SV=1	1	28.2	84.7	38.6	TMEM87A	0.455726	-1.13376
P82914	28S ribosomal protein S15, mitochondrial OS=Homo sapiens GN=MRPS15 PE=1 SV=1	2	169.3	349.1	159.1	MRPS15	0.455743	-1.13371
Q59ET0	Glucan, branching enzyme 1 variant (Fragment) OS=Homo sapiens PE=2 SV=1	2	1848	3249.4	1481	GBE1	0.455776	-1.1336
A0A024R755	Calumenin, isoform CRA_a OS=Homo sapiens GN=CALU PE=4 SV=1	2	32.5	154.9	70.6	CALU	0.455778	-1.1336
D3DUP1	WNK lysine deficient protein kinase 1, isoform CRA_b OS=Homo sapiens GN=WNK1 PE=4 SV=1	2	38	91.9	41.9	WNK1	0.45593	-1.13311
A0A1W1GSK9	DNA repair endonuclease XPF OS=Homo sapiens GN=ERCC4 PE=2 SV=1	1	17.3	32	14.6	ERCC4	0.45625	-1.1321
A0A024R6W0	Aspartate aminotransferase OS=Homo sapiens GN=GOT2 PE=4 SV=1	2	36.7	97	44.3	GOT2	0.456701	-1.13068
Q59ER5	WD repeat-containing protein 1 isoform 1 variant (Fragment) OS=Homo sapiens PE=2 SV=1	2	789.2	1390.9	635.4	WDR1	0.456827	-1.13028
P38606	V-type proton ATPase catalytic subunit A OS=Homo sapiens GN=ATP6V1A PE=1 SV=2	2	333	551.6	252	ATP6V1A	0.456853	-1.1302
Q9UFW8	CGG triplet repeat-binding protein 1 OS=Homo sapiens GN=CGGBP1 PE=1 SV=2	2	18.9	34.8	15.9	CGGBP1	0.456897	-1.13006
B2R4D5	Actin-related protein 2/3 complex subunit 3 OS=Homo sapiens PE=2 SV=1	2	54.7	99.9	45.7	ARPC3	0.457457	-1.12829
P25685	DnaJ homolog subfamily B member 1 OS=Homo sapiens GN=DNAJB1 PE=1 SV=4	2	192	405.1	185.4	DNAJB1	0.457665	-1.12764
A0A024R1U4	RAB5C, member RAS oncogene family, isoform CRA_a OS=Homo sapiens GN=RAB5C PE=4 SV=1	2	32.5	69.7	31.9	RAB5C	0.457676	-1.1276
B4DWB5	cDNA FLJ53931, highly similar to Bifunctional 3'-phosphoadenosine5'-phosphosulfate synthetase 2 OS=Homo sapiens PE=2 SV=1	2	213.3	395.2	181	PAPSS2	0.457996	-1.12659
Q96RS6	NudC domain-containing protein 1 OS=Homo sapiens GN=NUDCD1 PE=1 SV=2	2	77.3	67.9	31.1	NUDCD1	0.458027	-1.1265
A0A140VKA0	Caldesmon 1, isoform CRA_i OS=Homo sapiens GN=CALD1 PE=2 SV=1	2	873	790.2	362	CALD1	0.458112	-1.12623
Q53H88	Dynactin 2 variant (Fragment) OS=Homo sapiens PE=2 SV=1	2	347.1	587.3	269.1	DCTN2	0.458199	-1.12596
P07384	Calpain-1 catalytic subunit OS=Homo sapiens GN=CAPN1 PE=1 SV=1	2	214.4	375.6	172.1	CAPN1	0.4582	-1.12595
A0A0S2Z3W7	Nucleotide diphosphatase (Fragment) OS=Homo sapiens GN=ITPA PE=2 SV=1	2	97.3	182.4	83.6	ITPA	0.458333	-1.12553
P36542	ATP synthase subunit gamma, mitochondrial OS=Homo sapiens GN=ATP5C1 PE=1 SV=1	2	160.2	544.7	249.7	ATP5C1	0.458417	-1.12527
A0A024RDS1	Heat shock 105kDa/110kDa protein 1, isoform CRA_c OS=Homo sapiens GN=HSPH1 PE=3 SV=1	2	717.5	1773.9	813.2	HSPH1	0.458425	-1.12524
P17301	Integrin alpha-2 OS=Homo sapiens GN=ITGA2 PE=1 SV=1	2	9.4	18.1	8.3	ITGA2	0.458564	-1.12481
Q53SS8	Epididymis secretory protein Li 85 OS=Homo sapiens GN=PCBP1 PE=2 SV=1	2	463.5	843.7	386.9	PCBP1	0.458575	-1.12477
Q9Y266	Nuclear migration protein nudC OS=Homo sapiens GN=NUDC PE=1 SV=1	2	346.7	1359.6	623.6	NUDC	0.458664	-1.12449
A0A096LP25	AP2-associated protein kinase 1 (Fragment) OS=Homo sapiens GN=AAK1 PE=1 SV=1	2	41.5	71.5	32.8		0.458741	-1.12425
Q32P28	Prolyl 3-hydroxylase 1 OS=Homo sapiens GN=P3H1 PE=1 SV=2	2	7.4	30.5	14	LEPRE1; P3H1	0.459016	-1.12338
Q15056	Eukaryotic translation initiation factor 4H OS=Homo sapiens GN=EIF4H PE=1 SV=5	2	318.3	359.8	165.2	EIF4H	0.459144	-1.12298
E7EQZ4	Survival motor neuron protein OS=Homo sapiens GN=SMN1 PE=1 SV=1	2	26.2	52.7	24.2	SMN1; SMN2	0.459203	-1.1228
A0A024R2A7	Lectin, mannose-binding, 1, isoform CRA_b OS=Homo sapiens GN=LMAN1 PE=4 SV=1	2	62.8	195.2	89.7	LMAN1	0.459529	-1.12177
B2RAM6	cDNA, FLJ95005, highly similar to Homo sapiens kinesin family member 11 (KIF11), mRNA OS=Homo sapiens PE=2 SV=1	2	22.8	37.2	17.1	KIF11	0.459677	-1.12131
Q9Y6Y8	SEC23-interacting protein OS=Homo sapiens GN=SEC23IP PE=1 SV=1	2	882.5	1268.2	583	SEC23IP	0.459707	-1.12121
Q00839	Heterogeneous nuclear ribonucleoprotein U OS=Homo sapiens GN=HNRNPU PE=1 SV=6	2	1289.5	2874.9	1321.8	HNRNPU	0.459773	-1.12101
Q99961	Endophilin-A2 OS=Homo sapiens GN=SH3GL1 PE=1 SV=1	2	163.5	318.6	146.5	SH3GL1	0.459824	-1.12085
A0A024R904	Calcyclin binding protein, isoform CRA_a OS=Homo sapiens GN=CACYBP PE=4 SV=1	2	278.7	874.2	402.1	CACYBP	0.459963	-1.12041
Q13405	39S ribosomal protein L49, mitochondrial OS=Homo sapiens GN=MRPL49 PE=1 SV=1	2	32	92.6	42.6	MRPL49	0.460043	-1.12016
P49321	Nuclear autoantigenic sperm protein OS=Homo sapiens GN=NASP PE=1 SV=2	2	87	183.3	84.4	NASP	0.460447	-1.11889
Q96C19	EF-hand domain-containing protein D2 OS=Homo sapiens GN=EFHD2 PE=1 SV=1	2	241.6	362.1	166.9	EFHD2	0.460922	-1.1174
P05023	Sodium/potassium-transporting ATPase subunit alpha-1 OS=Homo sapiens GN=ATP1A1 PE=1 SV=1	2	314.9	729.4	336.2	ATP1A1	0.460927	-1.11739
A0A024R9D8	Sperm associated antigen 1, isoform CRA_b OS=Homo sapiens GN=SPAG1 PE=4 SV=1	2	23.9	44.9	20.7	SPAG1	0.461024	-1.11708
E7EVA0	Microtubule-associated protein OS=Homo sapiens GN=MAP4 PE=1 SV=1	2	1920.3	3620.9	1670.3	MAP4	0.461294	-1.11624
A0A0S2Z4R1	Tyrosine--tRNA ligase (Fragment) OS=Homo sapiens GN=YARS PE=2 SV=1	2	128.8	234.2	108.1	YARS	0.461571	-1.11537
Q8NE71	ATP-binding cassette sub-family F member 1 OS=Homo sapiens GN=ABCF1 PE=1 SV=2	2	204	390	180.1	ABCF1	0.461795	-1.11468
A0A087WW66	26S proteasome non-ATPase regulatory subunit 1 OS=Homo sapiens GN=PSMD1 PE=1 SV=1	2	272.6	561.5	259.4		0.461977	-1.11411
M0QXB5	Persulfide dioxygenase ETHE1, mitochondrial OS=Homo sapiens GN=ETHE1 PE=1 SV=1	2	48.6	164.5	76	ETHE1	0.462006	-1.11402
A0A0G2JH68	Protein diaphanous homolog 1 OS=Homo sapiens GN=DIAPH1 PE=1 SV=1	2	17.5	43.5	20.1		0.462069	-1.11382
G1UI16	SCC-112 protein, isoform CRA_b OS=Homo sapiens GN=PDS5A PE=2 SV=1	2	39.8	66	30.5	PDS5A	0.462121	-1.11366
Q01813	ATP-dependent 6-phosphofructokinase, platelet type OS=Homo sapiens GN=PFKP PE=1 SV=2	2	526	1070.2	494.7	PFKP	0.46225	-1.11325
B9EKV4	Aldehyde dehydrogenase 9 family, member A1 OS=Homo sapiens GN=ALDH9A1 PE=2 SV=1	2	387.7	968.1	447.9	ALDH9A1	0.462659	-1.11198
Q13619	Cullin-4A OS=Homo sapiens GN=CUL4A PE=1 SV=3	2	3.5	6.7	3.1	CUL4A	0.462687	-1.11189
O75663	TIP41-like protein OS=Homo sapiens GN=TIPRL PE=1 SV=2	1	48.1	82.3	38.1	TIPRL	0.46294	-1.1111
A0A087WXK8	Chromosome 20 open reading frame 129 OS=Homo sapiens GN=FAM83D PE=1 SV=1	1	16.2	33.9	15.7	FAM83D	0.463127	-1.11052
P13984	General transcription factor IIF subunit 2 OS=Homo sapiens GN=GTF2F2 PE=1 SV=2	1	140.9	72.1	33.4	GTF2F2	0.463245	-1.11015
P53041	Serine/threonine-protein phosphatase 5 OS=Homo sapiens GN=PPP5C PE=1 SV=1	2	124.6	690.9	320.1	PPP5C	0.463309	-1.10995
P07686	Beta-hexosaminidase subunit beta OS=Homo sapiens GN=HEXB PE=1 SV=3	2	124.1	390	180.7	HEXB	0.463333	-1.10988
Q9NR50	Translation initiation factor eIF-2B subunit gamma OS=Homo sapiens GN=EIF2B3 PE=1 SV=1	2	164	334.9	155.2	EIF2B3	0.463422	-1.1096
A0A087WSV8	Nucleobindin 2, isoform CRA_b OS=Homo sapiens GN=NUCB2 PE=1 SV=1	2	33.9	130	60.3	NUCB2	0.463846	-1.10828
Q9Y678	Coatomer subunit gamma-1 OS=Homo sapiens GN=COPG1 PE=1 SV=1	2	119.2	238.4	110.6	COPG1	0.463926	-1.10803
F6IR49	MHC class I antigen (Fragment) OS=Homo sapiens GN=HLA-A PE=3 SV=1	2	16.8	28	13	HLA-A	0.464286	-1.10692
Q5STZ8	ATP-binding cassette sub-family F member 1 (Fragment) OS=Homo sapiens GN=ABCF1 PE=1 SV=9	2	51.3	126.4	58.7		0.464399	-1.10656
O00629	Importin subunit alpha-3 OS=Homo sapiens GN=KPNA4 PE=1 SV=1	2	148	311	144.5	KPNA4	0.46463	-1.10585
J3KN16	KIAA0368 OS=Homo sapiens GN=KIAA0368 PE=1 SV=1	2	163.4	292.8	136.1	KIAA0368	0.464822	-1.10525
Q9Y5Q9	General transcription factor 3C polypeptide 3 OS=Homo sapiens GN=GTF3C3 PE=1 SV=1	1	22.1	76.8	35.7	GTF3C3	0.464844	-1.10518
P36639	7,8-dihydro-8-oxoguanine triphosphatase OS=Homo sapiens GN=NUDT1 PE=1 SV=3	2	111.6	218.3	101.5	NUDT1	0.464956	-1.10483
B0QY89	Eukaryotic translation initiation factor 3 subunit L OS=Homo sapiens GN=EIF3L PE=1 SV=1	2	487.7	870.1	404.6	EIF3L	0.465004	-1.10468
Q9UHV9	Prefoldin subunit 2 OS=Homo sapiens GN=PFDN2 PE=1 SV=1	2	164.6	858.7	399.3	PFDN2	0.465005	-1.10468
Q05D08	PA2G4 protein (Fragment) OS=Homo sapiens GN=PA2G4 PE=2 SV=1	2	571.5	1476.2	686.8	PA2G4	0.465249	-1.10393
B2RDF5	cDNA, FLJ96587, highly similar to Homo sapiens SUMO-1 activating enzyme subunit 2 (UBA2), mRNA OS=Homo sapiens PE=2 SV=1	2	30.7	73.5	34.2	UBA2	0.465306	-1.10375
Q9NRV9	Heme-binding protein 1 OS=Homo sapiens GN=HEBP1 PE=1 SV=1	2	49.6	112.8	52.5	HEBP1	0.465426	-1.10338
Q59HH7	X-ray repair cross complementing protein 1 variant (Fragment) OS=Homo sapiens PE=2 SV=1	2	139.6	201.3	93.7	XRCC1	0.465474	-1.10323
Q9HAV7	GrpE protein homolog 1, mitochondrial OS=Homo sapiens GN=GRPEL1 PE=1 SV=2	2	156.3	408.9	190.4	GRPEL1	0.46564	-1.10271
A8KAE0	cDNA FLJ78476, highly similar to Homo sapiens WD repeat and HMG-box DNA binding protein 1 (WDHD1), transcript variant 1, mRNA OS=Homo sapiens PE=2 SV=1	2	17.5	33.5	15.6	WDHD1	0.465672	-1.10262
H3BQK0	ATP-dependent RNA helicase DDX19B OS=Homo sapiens GN=DDX19B PE=1 SV=1	2	97.2	186.6	86.9	DDX19B	0.465702	-1.10252
A0A1S5UZ07	Talin-1 OS=Homo sapiens GN=TLN1 PE=2 SV=1	2	4527.9	5399.5	2514.6	TLN1	0.46571	-1.1025
P62269	40S ribosomal protein S18 OS=Homo sapiens GN=RPS18 PE=1 SV=3	2	85.6	195.1	90.9	RPS18	0.465915	-1.10186
O00487	26S proteasome non-ATPase regulatory subunit 14 OS=Homo sapiens GN=PSMD14 PE=1 SV=1	2	108.7	273.1	127.3	PSMD14	0.46613	-1.1012
A0A024RB23	Diacylglycerol kinase OS=Homo sapiens GN=DGKA PE=3 SV=1	2	9.9	28.3	13.2	DGKA	0.466431	-1.10026
Q13315	Serine-protein kinase ATM OS=Homo sapiens GN=ATM PE=1 SV=4	1	27.8	69.2	32.3	ATM	0.466763	-1.09924
P04732	Metallothionein-1E OS=Homo sapiens GN=MT1E PE=1 SV=1	2	51.9	200.1	93.4	MT1E	0.466767	-1.09923
Q13596	Sorting nexin-1 OS=Homo sapiens GN=SNX1 PE=1 SV=3	2	14.9	34.9	16.3	SNX1	0.467049	-1.09836
A8K132	cDNA FLJ75476, highly similar to Homo sapiens glutaminase (GLS), mRNA OS=Homo sapiens PE=2 SV=1	2	74.4	171.5	80.1	GLS	0.467055	-1.09833
A0A1B4Z394	Tubulin gamma chain OS=Homo sapiens GN=TUBG2 PE=2 SV=1	2	36.1	57.8	27	TUBG2	0.467128	-1.09811
A0A024R7I3	RAB8A, member RAS oncogene family, isoform CRA_a OS=Homo sapiens GN=RAB8A PE=4 SV=1	2	49.2	130.9	61.2	RAB8A	0.467532	-1.09686
A8K4G7	cDNA FLJ78528, highly similar to Homo sapiens vacuolar protein sorting 4B (yeast) (VPS4B), mRNA OS=Homo sapiens PE=2 SV=1	2	39.7	62	29	VPS4B	0.467742	-1.09622
Q69YJ7	Uncharacterized protein DKFZp667H197 (Fragment) OS=Homo sapiens GN=DKFZp667H197 PE=2 SV=1	2	245.8	338	158.2	RBM12	0.468047	-1.09527
O60502	Protein O-GlcNAcase OS=Homo sapiens GN=MGEA5 PE=1 SV=2	2	52.7	88.4	41.4	MGEA5	0.468326	-1.09442
P37108	Signal recognition particle 14 kDa protein OS=Homo sapiens GN=SRP14 PE=1 SV=2	2	60.8	160.1	75	SRP14	0.468457	-1.09401
P60866	40S ribosomal protein S20 OS=Homo sapiens GN=RPS20 PE=1 SV=1	2	77.4	259	121.4	RPS20	0.468726	-1.09318
Q15124	Phosphoglucomutase-like protein 5 OS=Homo sapiens GN=PGM5 PE=1 SV=2	2	87	138	64.7	PGM5	0.468841	-1.09283
P41091	Eukaryotic translation initiation factor 2 subunit 3 OS=Homo sapiens GN=EIF2S3 PE=1 SV=3	2	259.5	524.4	246	EIF2S3	0.469108	-1.09201
Q15942	Zyxin OS=Homo sapiens GN=ZYX PE=1 SV=1	2	400.8	652.2	306.2	ZYX	0.469488	-1.09084
B5BU81	YKT6 v-SNARE protein OS=Homo sapiens GN=YKT6 PE=2 SV=1	2	49.4	71.9	33.8	YKT6	0.470097	-1.08897
Q504R6	RAB13 protein (Fragment) OS=Homo sapiens GN=RAB13 PE=2 SV=1	2	53.6	132.7	62.4	RAB13	0.470234	-1.08855
Q5U0L9	Homer homolog 3 (Drosophila) OS=Homo sapiens PE=2 SV=1	2	16.1	22.1	10.4	HOMER3	0.470588	-1.08746
Q13620	Cullin-4B OS=Homo sapiens GN=CUL4B PE=1 SV=4	2	479.9	793.8	373.6	CUL4B	0.470648	-1.08728
B5BU38	Annexin OS=Homo sapiens GN=ANXA1 PE=2 SV=1	2	291	436.8	205.6	ANXA1	0.470696	-1.08713
P41208	Centrin-2 OS=Homo sapiens GN=CETN2 PE=1 SV=1	2	47	104.5	49.2	CETN2	0.470813	-1.08677
Q9BQS8	FYVE and coiled-coil domain-containing protein 1 OS=Homo sapiens GN=FYCO1 PE=1 SV=3	2	43	72.1	34	FYCO1	0.471567	-1.08446
A0A1C7CYZ0	Active breakpoint cluster region-related protein OS=Homo sapiens GN=ABR PE=1 SV=1	2	337.8	374.7	176.7	ABR	0.471577	-1.08443
G3XAI2	Laminin subunit beta-1 OS=Homo sapiens GN=LAMB1 PE=1 SV=1	2	44.7	127.6	60.2	LAMB1	0.471787	-1.08379
A0A1K0GXZ1	Globin C1 OS=Homo sapiens GN=GLNC1 PE=3 SV=1	2	60.4	169.1	79.8		0.47191	-1.08342
Q9UEW8	STE20/SPS1-related proline-alanine-rich protein kinase OS=Homo sapiens GN=STK39 PE=1 SV=3	2	175.6	306.1	144.5	STK39	0.472068	-1.08293
B4DUT2	cDNA FLJ53206 OS=Homo sapiens PE=2 SV=1	2	17	36.4	17.2	KRI1	0.472527	-1.08153
A0A024RBG1	Nudix (Nucleoside diphosphate linked moiety X)-type motif 4, isoform CRA_b OS=Homo sapiens GN=NUDT4 PE=4 SV=1	2	10.1	25.6	12.1	NUDT4	0.472656	-1.08114
A0A024R8D4	Mitochondrial ribosomal protein S2, isoform CRA_a OS=Homo sapiens GN=MRPS2 PE=3 SV=1	2	47	104.5	49.4	MRPS2	0.472727	-1.08092
B4DUP2	cDNA FLJ56155, highly similar to UTP--glucose-1-phosphate uridylyltransferase 2 (EC 2.7.7.9) OS=Homo sapiens PE=2 SV=1	2	589.1	746.7	353.3	UGP2	0.473149	-1.07963
A0A024RDE5	Ras-GTPase activating protein SH3 domain-binding protein 2, isoform CRA_a OS=Homo sapiens GN=G3BP2 PE=4 SV=1	2	48.1	119.4	56.5	G3BP2	0.473199	-1.07948
P15559	NAD(P)H dehydrogenase [quinone] 1 OS=Homo sapiens GN=NQO1 PE=1 SV=1	2	286.8	434.2	205.5	NQO1	0.473284	-1.07922
P53985	Monocarboxylate transporter 1 OS=Homo sapiens GN=SLC16A1 PE=1 SV=3	2	26.4	81.5	38.6	SLC16A1	0.47362	-1.0782
O95372	Acyl-protein thioesterase 2 OS=Homo sapiens GN=LYPLA2 PE=1 SV=1	2	25.1	45.6	21.6	LYPLA2	0.473684	-1.078
P04843	Dolichyl-diphosphooligosaccharide--protein glycosyltransferase subunit 1 OS=Homo sapiens GN=RPN1 PE=1 SV=1	2	153.8	454.7	215.4	RPN1	0.473719	-1.0779
Q86TB9	Protein PAT1 homolog 1 OS=Homo sapiens GN=PATL1 PE=1 SV=2	1	54.8	106.6	50.5	PATL1	0.473734	-1.07785
Q9Y4X5	E3 ubiquitin-protein ligase ARIH1 OS=Homo sapiens GN=ARIH1 PE=1 SV=2	2	92.4	158.4	75.1	ARIH1	0.474116	-1.07669
A0A090N7T9	Secernin 1 OS=Homo sapiens GN=SCRN1 PE=4 SV=1	2	70.6	129.9	61.6	SCRN1	0.474211	-1.0764
Q96HE7	ERO1-like protein alpha OS=Homo sapiens GN=ERO1A PE=1 SV=2	2	147.7	254.3	120.6	ERO1L; ERO1A	0.474243	-1.0763
B4DI08	cDNA FLJ60091, highly similar to Hypoxia-inducible factor 1 alpha inhibitor(EC 1.14.11.16) OS=Homo sapiens PE=2 SV=1	1	54.9	109.2	51.8	HIF1AN	0.474359	-1.07595
A8K9X5	cDNA FLJ76472, highly similar to Homo sapiens Fas (TNFRSF6) associated factor 1 (FAF1), transcript variant 1, mRNA OS=Homo sapiens PE=2 SV=1	2	104.9	213.5	101.3	FAF1	0.474473	-1.0756
Q9H3P7	Golgi resident protein GCP60 OS=Homo sapiens GN=ACBD3 PE=1 SV=4	2	34.5	51.8	24.6	ACBD3	0.474903	-1.07429
Q14161	ARF GTPase-activating protein GIT2 OS=Homo sapiens GN=GIT2 PE=1 SV=2	2	18.8	36	17.1	GIT2	0.475	-1.074
B4DSP0	HCG1642748, isoform CRA_b OS=Homo sapiens GN=PEG10 PE=1 SV=1	1	18.8	36	17.1	PEG10	0.475	-1.074
A8MUM1	Protein TSSC1 OS=Homo sapiens GN=EIPR1 PE=1 SV=2	1	41.8	70.3	33.4	TSSC1; EIPR1	0.475107	-1.07368
G3V5Z7	Proteasome subunit alpha type OS=Homo sapiens GN=PSMA6 PE=1 SV=1	2	315.8	775.8	368.6		0.475122	-1.07363
P07900	Heat shock protein HSP 90-alpha OS=Homo sapiens GN=HSP90AA1 PE=1 SV=5	2	862.5	6430.5	3057.8	HSP90AA1	0.475515	-1.07244
Q7L5N1	COP9 signalosome complex subunit 6 OS=Homo sapiens GN=COPS6 PE=1 SV=1	2	63.6	106.2	50.5	COPS6	0.475518	-1.07243
P14174	Macrophage migration inhibitory factor OS=Homo sapiens GN=MIF PE=1 SV=4	1	57.6	65.4	31.1	MIF	0.475535	-1.07238
Q96PD2	Discoidin, CUB and LCCL domain-containing protein 2 OS=Homo sapiens GN=DCBLD2 PE=1 SV=1	2	36.9	116.3	55.4	DCBLD2	0.476354	-1.06989
B3KTJ9	cDNA FLJ38393 fis, clone FEBRA2007212 OS=Homo sapiens PE=2 SV=1	2	237	520.8	248.1	CCAR2; KIAA1967	0.476382	-1.06981
P53611	Geranylgeranyl transferase type-2 subunit beta OS=Homo sapiens GN=RABGGTB PE=1 SV=2	1	109.6	167	79.6	RABGGTB	0.476647	-1.06901
O60583	Cyclin-T2 OS=Homo sapiens GN=CCNT2 PE=1 SV=2	1	13.2	26.2	12.5	CCNT2	0.477099	-1.06764
Q9Y295	Developmentally-regulated GTP-binding protein 1 OS=Homo sapiens GN=DRG1 PE=1 SV=1	2	61.5	114	54.4	DRG1	0.477193	-1.06736
Q9P2Q2	FERM domain-containing protein 4A OS=Homo sapiens GN=FRMD4A PE=1 SV=3	1	21.5	50.9	24.3	FRMD4A	0.477407	-1.06671
V9HVZ7	Epididymis luminal protein 176 OS=Homo sapiens GN=HEL-176 PE=2 SV=1	2	48.3	46.7	22.3	ACTG1	0.477516	-1.06638
P46060	Ran GTPase-activating protein 1 OS=Homo sapiens GN=RANGAP1 PE=1 SV=1	2	6.9	13.4	6.4	RANGAP1	0.477612	-1.06609
Q9H993	Protein-glutamate O-methyltransferase OS=Homo sapiens GN=ARMT1 PE=1 SV=1	2	18.9	33.7	16.1	C6orf211; ARMT1	0.477745	-1.06569
A8K335	cDNA FLJ76254, highly similar to Homo sapiens gamma-glutamyl hydrolase (GGH), mRNA OS=Homo sapiens PE=2 SV=1	2	65.9	125.5	60	GGH	0.478088	-1.06465
P23921	Ribonucleoside-diphosphate reductase large subunit OS=Homo sapiens GN=RRM1 PE=1 SV=1	2	113.4	137	65.5	RRM1	0.478102	-1.06461
Q13144	Translation initiation factor eIF-2B subunit epsilon OS=Homo sapiens GN=EIF2B5 PE=1 SV=3	2	31.3	57.3	27.4	EIF2B5	0.478185	-1.06436
A0A0A0MRR7	U1 small nuclear ribonucleoprotein C OS=Homo sapiens GN=SNRPC PE=1 SV=1	2	79.8	215.6	103.1	SNRPC	0.4782	-1.06431
Q07954	Prolow-density lipoprotein receptor-related protein 1 OS=Homo sapiens GN=LRP1 PE=1 SV=2	2	499.9	1523.3	729.1	LRP1	0.478632	-1.06301
A0A0A6YYL6	Protein RPL17-C18orf32 OS=Homo sapiens GN=RPL17-C18orf32 PE=3 SV=1	2	308.6	835.6	400.1	RPL17-C18ORF32; RPL17	0.478818	-1.06245
A8K3C3	T-complex protein 1 subunit delta OS=Homo sapiens PE=2 SV=1	2	650.1	1669.2	799.4	CCT4	0.478912	-1.06217
C9JIF9	Acylamino-acid-releasing enzyme OS=Homo sapiens GN=APEH PE=1 SV=1	2	473.5	885.5	424.6		0.479503	-1.06039
V9HW29	Kinesin-like protein OS=Homo sapiens GN=HEL-S-61 PE=1 SV=1	2	826.3	1075.1	515.6	KIF5B	0.479583	-1.06015
Q8TD16	Protein bicaudal D homolog 2 OS=Homo sapiens GN=BICD2 PE=1 SV=1	1	6.3	27.1	13	BICD2	0.479705	-1.05978
A0A024QZS4	Peptidyl-prolyl cis-trans isomerase OS=Homo sapiens GN=PPIF PE=3 SV=1	2	166.9	399.2	191.5	PPIF	0.479709	-1.05977
Q59FC3	G protein-coupled receptor kinase interactor 1 variant (Fragment) OS=Homo sapiens PE=2 SV=1	2	54.4	97.1	46.6	GIT1	0.479918	-1.05914
P52294	Importin subunit alpha-5 OS=Homo sapiens GN=KPNA1 PE=1 SV=3	2	199	392.7	188.6	KPNA1	0.480265	-1.0581
O15371	Eukaryotic translation initiation factor 3 subunit D OS=Homo sapiens GN=EIF3D PE=1 SV=1	2	119.2	220.5	105.9	EIF3D	0.480272	-1.05808
Q13217	DnaJ homolog subfamily C member 3 OS=Homo sapiens GN=DNAJC3 PE=1 SV=1	2	29.3	82.4	39.6	DNAJC3	0.480583	-1.05714
P21399	Cytoplasmic aconitate hydratase OS=Homo sapiens GN=ACO1 PE=1 SV=3	2	226.4	386.4	185.7	ACO1	0.48059	-1.05712
O75436	Vacuolar protein sorting-associated protein 26A OS=Homo sapiens GN=VPS26A PE=1 SV=2	2	312.7	413.4	198.7	VPS26A	0.480648	-1.05695
P10644	cAMP-dependent protein kinase type I-alpha regulatory subunit OS=Homo sapiens GN=PRKAR1A PE=1 SV=1	2	128	248.6	119.5	PRKAR1A	0.480692	-1.05682
P61221	ATP-binding cassette sub-family E member 1 OS=Homo sapiens GN=ABCE1 PE=1 SV=1	2	760.9	860	413.4	ABCE1	0.480698	-1.0568
A0A087WZN1	Isocitrate dehydrogenase [NAD] subunit, mitochondrial OS=Homo sapiens GN=IDH3B PE=1 SV=1	1	22.5	28.5	13.7	IDH3B	0.480702	-1.05679
O75390	Citrate synthase, mitochondrial OS=Homo sapiens GN=CS PE=1 SV=2	2	218.7	312.4	150.2	CS	0.480794	-1.05651
P57721	Poly(rC)-binding protein 3 OS=Homo sapiens GN=PCBP3 PE=2 SV=2	1	80.4	162	77.9	PCBP3	0.480864	-1.0563
V9HWE9	Epididymis secretory protein Li 22 OS=Homo sapiens GN=HEL-S-22 PE=2 SV=1	2	80	145.5	70	GSTP1	0.4811	-1.05559
A0A087WYR3	Tumor protein D54 OS=Homo sapiens GN=TPD52L2 PE=1 SV=1	2	41.4	91.6	44.1	TPD52L2	0.481441	-1.05457
Q9UJ70	N-acetyl-D-glucosamine kinase OS=Homo sapiens GN=NAGK PE=1 SV=4	2	40.5	65.6	31.6	NAGK	0.481707	-1.05377
P46063	ATP-dependent DNA helicase Q1 OS=Homo sapiens GN=RECQL PE=1 SV=3	2	940.7	1157.5	557.9	RECQL	0.481987	-1.05293
P11274	Breakpoint cluster region protein OS=Homo sapiens GN=BCR PE=1 SV=2	2	216.3	138.9	67	BCR	0.482361	-1.05181
A0A1B0GU03	Uncharacterized protein OS=Homo sapiens PE=1 SV=1	2	103	386.2	186.3		0.482393	-1.05172
Q02539	Histone H1.1 OS=Homo sapiens GN=HIST1H1A PE=1 SV=3	1	20.9	51.4	24.8	HIST1H1A	0.48249	-1.05143
P84098	60S ribosomal protein L19 OS=Homo sapiens GN=RPL19 PE=1 SV=1	2	300.1	739.5	356.9	RPL19	0.482623	-1.05103
A0A024R625	Serine/threonine-protein phosphatase OS=Homo sapiens GN=PPP4C PE=3 SV=1	2	15.1	31.7	15.3	PPP4C	0.48265	-1.05095
B7Z6C2	cDNA FLJ50663, highly similar to Phosphoglucomutase-1 (EC 5.4.2.2) OS=Homo sapiens PE=2 SV=1	2	84.9	152	73.4	PGM1	0.482895	-1.05022
P61160	Actin-related protein 2 OS=Homo sapiens GN=ACTR2 PE=1 SV=1	2	205.4	328.2	158.5	ACTR2	0.482937	-1.05009
A0A1X7SBS4	Transcriptional enhancer factor TEF-5 OS=Homo sapiens GN=TEAD3 PE=1 SV=1	2	174.8	14.7	7.1		0.482993	-1.04993
X6R8A1	Carboxypeptidase OS=Homo sapiens GN=CTSA PE=1 SV=1	2	55	176.6	85.3	CTSA	0.483012	-1.04987
Q59G24	Activated RNA polymerase II transcription cofactor 4 variant (Fragment) OS=Homo sapiens PE=2 SV=1	2	684.1	948.5	458.7	SUB1	0.483606	-1.0481
K7PML8	Cyclin-dependent kinase inhibitor 2A OS=Homo sapiens GN=CDKN2A PE=2 SV=1	2	37.3	119.1	57.6	CDKN2A	0.483627	-1.04803
A0A024R0C3	Nicotinamide nucleotide transhydrogenase, isoform CRA_a OS=Homo sapiens GN=NNT PE=4 SV=1	2	1.7	3.1	1.5	NNT	0.483871	-1.04731
V9HW48	SH3 domain-binding glutamic acid-rich-like protein OS=Homo sapiens GN=HEL-S-115 PE=2 SV=1	2	47.1	141.7	68.6	SH3BGRL	0.484121	-1.04656
Q9H0F6	Sharpin OS=Homo sapiens GN=SHARPIN PE=1 SV=1	1	97.4	143.7	69.6	SHARPIN	0.484342	-1.0459
Q8IWC1	MAP7 domain-containing protein 3 OS=Homo sapiens GN=MAP7D3 PE=1 SV=2	1	37	90.2	43.7	MAP7D3	0.484479	-1.04549
A0A024QZN6	Retinoic acid induced 17, isoform CRA_a OS=Homo sapiens GN=RAI17 PE=4 SV=1	2	44.2	53	25.7	ZMIZ1	0.484906	-1.04422
Q68D38	Uncharacterized protein DKFZp686O15119 (Fragment) OS=Homo sapiens GN=DKFZp686O15119 PE=2 SV=1	2	14.5	33.4	16.2	GLS	0.48503	-1.04385
P42224	Signal transducer and activator of transcription 1-alpha/beta OS=Homo sapiens GN=STAT1 PE=1 SV=2	2	328	310.4	150.6	STAT1	0.48518	-1.04341
P62633	Cellular nucleic acid-binding protein OS=Homo sapiens GN=CNBP PE=1 SV=1	2	199.4	426.8	207.2	CNBP	0.485473	-1.04254
P07919	Cytochrome b-c1 complex subunit 6, mitochondrial OS=Homo sapiens GN=UQCRH PE=1 SV=2	2	34.9	58.9	28.6	UQCRH	0.485569	-1.04225
P15880	40S ribosomal protein S2 OS=Homo sapiens GN=RPS2 PE=1 SV=2	2	439.1	1149.2	558.2	RPS2	0.485729	-1.04178
D6REX3	Protein transport protein Sec31A OS=Homo sapiens GN=SEC31A PE=1 SV=1	2	1196.4	1636	794.7	SEC31A	0.485758	-1.04169
P62280	40S ribosomal protein S11 OS=Homo sapiens GN=RPS11 PE=1 SV=3	2	225.5	490.7	238.4	RPS11	0.485837	-1.04146
E7EPK1	Septin-7 OS=Homo sapiens GN=SEPT7 PE=1 SV=2	2	914.9	1199.3	582.7		0.485867	-1.04137
P49773	Histidine triad nucleotide-binding protein 1 OS=Homo sapiens GN=HINT1 PE=1 SV=2	2	144.8	302.3	146.9	HINT1	0.485941	-1.04115
B7ZLW8	5-methyltetrahydrofolate-homocysteine methyltransferase OS=Homo sapiens GN=MTR PE=2 SV=1	2	152.5	107	52	MTR	0.485981	-1.04103
B3KN28	Phosphoacetylglucosamine mutase OS=Homo sapiens PE=2 SV=1	2	65.4	105.7	51.4	PGM3	0.486282	-1.04014
B4DUC8	S-methyl-5'-thioadenosine phosphorylase OS=Homo sapiens GN=MTAP PE=1 SV=1	2	28.2	48.3	23.5	MTAP	0.486542	-1.03936
A6NGJ0	Dynein light chain Tctex-type 3 OS=Homo sapiens GN=DYNLT3 PE=1 SV=1	2	45.9	81.8	39.8		0.486553	-1.03933
V9HWA6	Epididymis luminal protein 32 OS=Homo sapiens GN=HEL32 PE=2 SV=1	2	238	392.3	190.9	DSTN	0.486617	-1.03914
Q59FT7	Mitogen-activated protein kinase kinase kinase 7 interacting protein 1 isoform alpha variant (Fragment) OS=Homo sapiens PE=2 SV=1	2	52.8	116.2	56.6		0.487091	-1.03774
Q9NZN5	Rho guanine nucleotide exchange factor 12 OS=Homo sapiens GN=ARHGEF12 PE=1 SV=1	2	89.1	104.7	51	ARHGEF12	0.487106	-1.03769
Q9BRP8	Partner of Y14 and mago OS=Homo sapiens GN=PYM1 PE=1 SV=1	2	107.8	248.8	121.2	WIBG; PYM1	0.487138	-1.0376
J3KNF8	Cytochrome b5 type B OS=Homo sapiens GN=CYB5B PE=1 SV=1	2	13.2	23.8	11.6	CYB5B	0.487395	-1.03684
A8K9E1	cDNA FLJ77957, highly similar to Homo sapiens HBS1-like (S. cerevisiae) (HBS1L), mRNA OS=Homo sapiens PE=2 SV=1	2	181.3	281.7	137.3		0.487398	-1.03683
O60331	Phosphatidylinositol 4-phosphate 5-kinase type-1 gamma OS=Homo sapiens GN=PIP5K1C PE=1 SV=2	1	68.6	51.7	25.2	PIP5K1C	0.487427	-1.03674
P17987	T-complex protein 1 subunit alpha OS=Homo sapiens GN=TCP1 PE=1 SV=1	2	751.5	2057.9	1003.2	TCP1	0.487487	-1.03656
Q4W4Y1	Dopamine receptor interacting protein 4 OS=Homo sapiens GN=DRIP4 PE=2 SV=1	2	1195.5	1830.7	892.7	PDCD6IP	0.487628	-1.03615
Q13084	39S ribosomal protein L28, mitochondrial OS=Homo sapiens GN=MRPL28 PE=1 SV=4	2	41.1	93.5	45.6	MRPL28	0.487701	-1.03593
P43686	26S proteasome regulatory subunit 6B OS=Homo sapiens GN=PSMC4 PE=1 SV=2	2	270.4	683.8	333.5	PSMC4	0.487716	-1.03589
O15021	Microtubule-associated serine/threonine-protein kinase 4 OS=Homo sapiens GN=MAST4 PE=1 SV=3	1	77.6	131	63.9	MAST4	0.487786	-1.03568
P30622	CAP-Gly domain-containing linker protein 1 OS=Homo sapiens GN=CLIP1 PE=1 SV=2	2	72.2	105.1	51.3	CLIP1	0.488107	-1.03473
Q14693	Phosphatidate phosphatase LPIN1 OS=Homo sapiens GN=LPIN1 PE=1 SV=2	2	82.9	118	57.6	LPIN1	0.488136	-1.03465
P49411	Elongation factor Tu, mitochondrial OS=Homo sapiens GN=TUFM PE=1 SV=2	2	494.6	1669.8	815.2	TUFM	0.488202	-1.03445
Q70CQ2	Ubiquitin carboxyl-terminal hydrolase 34 OS=Homo sapiens GN=USP34 PE=1 SV=2	1	50	77.4	37.8	USP34	0.488372	-1.03395
A0A024QZF2	Related RAS viral (R-ras) oncogene homolog, isoform CRA_a OS=Homo sapiens GN=RRAS PE=4 SV=1	2	13.8	25.8	12.6	RRAS	0.488372	-1.03395
Q13649	Threonine, tyrosine phosphatase (Fragment) OS=Homo sapiens PE=2 SV=1	2	110.6	944.1	461.1	DUSP4	0.488402	-1.03386
Q13610	Periodic tryptophan protein 1 homolog OS=Homo sapiens GN=PWP1 PE=1 SV=1	1	61.8	117.1	57.2	PWP1	0.488471	-1.03365
Q9P227	Rho GTPase-activating protein 23 OS=Homo sapiens GN=ARHGAP23 PE=1 SV=2	2	19.4	48.7	23.8	ARHGAP23	0.488706	-1.03296
E5KT65	DNA-directed RNA polymerase subunit RPABC1 OS=Homo sapiens PE=3 SV=1	2	21.1	39.9	19.5	POLR2E	0.488722	-1.03291
Q8IY63	Angiomotin-like protein 1 OS=Homo sapiens GN=AMOTL1 PE=1 SV=1	1	12.5	18	8.8	AMOTL1	0.488889	-1.03242
O60504	Vinexin OS=Homo sapiens GN=SORBS3 PE=1 SV=2	2	15	31.7	15.5	SORBS3	0.488959	-1.03221
P15121	Aldose reductase OS=Homo sapiens GN=AKR1B1 PE=1 SV=3	2	26.7	41.1	20.1	AKR1B1	0.489051	-1.03194
F8W0W8	Serine/threonine-protein phosphatase OS=Homo sapiens GN=PPP1CC PE=1 SV=1	2	49.6	75	36.7		0.489333	-1.03111
B2R8R5	cDNA, FLJ94025, highly similar to Homo sapiens tripartite motif-containing 28 (TRIM28), mRNA OS=Homo sapiens PE=2 SV=1	2	78.6	131.6	64.4	TRIM28	0.489362	-1.03103
Q9UHD8	Septin-9 OS=Homo sapiens GN=SEPT9 PE=1 SV=2	2	392.5	551.3	269.8	SEPT9	0.489389	-1.03095
P19525	Interferon-induced, double-stranded RNA-activated protein kinase OS=Homo sapiens GN=EIF2AK2 PE=1 SV=2	2	158.7	351.2	171.9	EIF2AK2	0.489465	-1.03072
Q14197	Peptidyl-tRNA hydrolase ICT1, mitochondrial OS=Homo sapiens GN=MRPL58 PE=1 SV=1	2	6.4	14.3	7	ICT1; MRPL58	0.48951	-1.03059
P55060	Exportin-2 OS=Homo sapiens GN=CSE1L PE=1 SV=3	2	420.3	846.9	414.6	CSE1L	0.48955	-1.03047
B2R739	cDNA, FLJ93269, highly similar to Homo sapiens mitochondrial ribosomal protein L15 (MRPL15), nuclear gene encoding mitochondrial protein, mRNA OS=Homo sapiens PE=2 SV=1	2	128.9	298.3	146.1	MRPL15	0.489775	-1.02981
Q9HD33	39S ribosomal protein L47, mitochondrial OS=Homo sapiens GN=MRPL47 PE=1 SV=2	1	18.4	34.5	16.9	MRPL47	0.489855	-1.02957
P33316	Deoxyuridine 5'-triphosphate nucleotidohydrolase, mitochondrial OS=Homo sapiens GN=DUT PE=1 SV=4	2	33.6	55.1	27	DUT	0.490018	-1.02909
Q92575	UBX domain-containing protein 4 OS=Homo sapiens GN=UBXN4 PE=1 SV=2	1	156.9	224.4	110	UBXN4	0.490196	-1.02857
Q06830	Peroxiredoxin-1 OS=Homo sapiens GN=PRDX1 PE=1 SV=1	2	1157.4	1905.7	934.4	PRDX1	0.490319	-1.02821
Q14247	Src substrate cortactin OS=Homo sapiens GN=CTTN PE=1 SV=2	2	1365.9	1859.8	911.9	CTTN	0.490322	-1.0282
Q8TEW0	Partitioning defective 3 homolog OS=Homo sapiens GN=PARD3 PE=1 SV=2	2	53.4	100.7	49.4	PARD3	0.490566	-1.02748
A5PLN9	Trafficking protein particle complex subunit 13 OS=Homo sapiens GN=TRAPPC13 PE=1 SV=2	1	21.1	37.1	18.2	C5orf44; TRAPPC13	0.490566	-1.02748
P46783	40S ribosomal protein S10 OS=Homo sapiens GN=RPS10 PE=1 SV=1	2	474.2	928.9	455.7	RPS10	0.49058	-1.02744
A0A0S2Z5C9	Putative tRNA (cytidine(32)/guanosine(34)-2'-O)-methyltransferase OS=Homo sapiens GN=FTSJ1 PE=2 SV=1	2	10	21.6	10.6	FTSJ1	0.490741	-1.02697
P26641	Elongation factor 1-gamma OS=Homo sapiens GN=EEF1G PE=1 SV=3	2	1293.8	1820.5	893.5	EEF1G	0.490799	-1.0268
A0A024RBH2	Cytoskeleton-associated protein 4, isoform CRA_c OS=Homo sapiens GN=CKAP4 PE=4 SV=1	2	59	126.9	62.4	CKAP4	0.491726	-1.02407
Q14165	Malectin OS=Homo sapiens GN=MLEC PE=1 SV=1	2	12.6	30.7	15.1	MLEC	0.491857	-1.02369
P41250	Glycine--tRNA ligase OS=Homo sapiens GN=GARS PE=1 SV=3	2	289.5	340.9	167.7	GARS	0.491933	-1.02347
O00231	26S proteasome non-ATPase regulatory subunit 11 OS=Homo sapiens GN=PSMD11 PE=1 SV=3	2	105	233.9	115.1	PSMD11	0.492091	-1.023
A0A0A6YZ17	Ubiquitinyl hydrolase 1 OS=Homo sapiens PE=2 SV=1	1	37.3	50.8	25	USP13	0.492126	-1.0229
Q14203	Dynactin subunit 1 OS=Homo sapiens GN=DCTN1 PE=1 SV=3	2	441.4	791.3	389.5	DCTN1	0.492228	-1.0226
Q5VUC7	Glycylpeptide N-tetradecanoyltransferase OS=Homo sapiens GN=NMT2 PE=3 SV=1	2	98	247.2	121.7	NMT2	0.492314	-1.02235
D6RBW1	Eukaryotic translation initiation factor 4E OS=Homo sapiens GN=EIF4E PE=1 SV=1	2	88.3	158.2	77.9	EIF4E	0.492415	-1.02205
Q969U7	Proteasome assembly chaperone 2 OS=Homo sapiens GN=PSMG2 PE=1 SV=1	1	63.6	92.6	45.6	PSMG2	0.492441	-1.02198
A0A024R4I7	Leucine zipper and CTNNBIP1 domain containing, isoform CRA_a OS=Homo sapiens GN=LZIC PE=4 SV=1	2	50.1	99.7	49.1	LZIC	0.492477	-1.02187
Q13616	Cullin-1 OS=Homo sapiens GN=CUL1 PE=1 SV=2	2	88.1	121.4	59.8	CUL1	0.492586	-1.02155
B4E1J8	cDNA FLJ56285, highly similar to ADP-ribosylation factor-like protein 8B OS=Homo sapiens PE=2 SV=1	2	24.8	86	42.4	ARL8B	0.493023	-1.02027
Q12756	Kinesin-like protein KIF1A OS=Homo sapiens GN=KIF1A PE=1 SV=2	1	2.4	14.4	7.1	KIF1A	0.493056	-1.02018
E5KN59	Peptidyl-prolyl cis-trans isomerase D OS=Homo sapiens PE=4 SV=1	2	61.3	232.1	114.5	PPID	0.493322	-1.0194
Q59ES3	Amino acid transporter (Fragment) OS=Homo sapiens PE=2 SV=1	2	17.4	31.6	15.6	SLC1A5	0.493671	-1.01838
A0A087WZV0	Inositol hexakisphosphate and diphosphoinositol-pentakisphosphate kinase 2 OS=Homo sapiens GN=PPIP5K2 PE=1 SV=1	2	74	142.8	70.5	PPIP5K2	0.493697	-1.0183
A0A024R125	Protein kinase, AMP-activated, gamma 1 non-catalytic subunit, isoform CRA_a OS=Homo sapiens GN=PRKAG1 PE=4 SV=1	2	18.4	25.5	12.6	PRKAG1	0.494118	-1.01707
Q9BV44	THUMP domain-containing protein 3 OS=Homo sapiens GN=THUMPD3 PE=1 SV=1	1	30.7	52.8	26.1	THUMPD3	0.494318	-1.01649
A0A087WZT3	BolA-like protein 2 OS=Homo sapiens GN=BOLA2 PE=1 SV=2	2	36.5	53.8	26.6	LOC101060252; BOLA2; BOLA2B; LOC102725214; LOC107984053	0.494424	-1.01618
A0A024R0L5	Glycogen synthase kinase 3 alpha, isoform CRA_a OS=Homo sapiens GN=GSK3A PE=3 SV=1	2	101	166	82.1	GSK3A	0.494578	-1.01573
P13639	Elongation factor 2 OS=Homo sapiens GN=EEF2 PE=1 SV=4	2	2890.9	4142.3	2049	EEF2	0.494653	-1.01551
A0A109NGN6	Proteasome subunit alpha type OS=Homo sapiens PE=2 SV=1	2	212.7	439.9	217.7	PSMA5	0.494885	-1.01483
Q9NXR7	BRISC and BRCA1-A complex member 2 OS=Homo sapiens GN=BABAM2 PE=1 SV=2	1	9.4	21.4	10.6	BRE; BABAM2	0.495327	-1.01355
A0A024RAI1	ARP3 actin-related protein 3 homolog (Yeast), isoform CRA_a OS=Homo sapiens GN=ACTR3 PE=3 SV=1	2	431.3	736.6	364.9	ACTR3	0.495384	-1.01338
K7ELC2	40S ribosomal protein S15 OS=Homo sapiens GN=RPS15 PE=1 SV=1	2	186.7	431.8	214	RPS15	0.4956	-1.01275
P82912	28S ribosomal protein S11, mitochondrial OS=Homo sapiens GN=MRPS11 PE=1 SV=2	2	70.3	165.3	82	MRPS11	0.496068	-1.01139
Q9UNF0	Protein kinase C and casein kinase substrate in neurons protein 2 OS=Homo sapiens GN=PACSIN2 PE=1 SV=2	2	49.9	68.5	34	PACSIN2	0.49635	-1.01057
Q96N66	Lysophospholipid acyltransferase 7 OS=Homo sapiens GN=MBOAT7 PE=1 SV=2	2	11.2	41.7	20.7	MBOAT7	0.496403	-1.01042
V9HWK2	Epididymis luminal protein 114 OS=Homo sapiens GN=HEL114 PE=2 SV=1	2	1960.5	2518	1250.3	VCL	0.496545	-1.01
Q13526	Peptidyl-prolyl cis-trans isomerase NIMA-interacting 1 OS=Homo sapiens GN=PIN1 PE=1 SV=1	2	26.7	66	32.8	PIN1	0.49697	-1.00877
P50851	Lipopolysaccharide-responsive and beige-like anchor protein OS=Homo sapiens GN=LRBA PE=1 SV=4	2	56.4	103.7	51.6	LRBA	0.497589	-1.00697
Q13057	Bifunctional coenzyme A synthase OS=Homo sapiens GN=COASY PE=1 SV=4	2	16.5	21.1	10.5	COASY	0.49763	-1.00685
P08559	Pyruvate dehydrogenase E1 component subunit alpha, somatic form, mitochondrial OS=Homo sapiens GN=PDHA1 PE=1 SV=3	2	71.5	132.4	65.9	PDHA1	0.497734	-1.00655
P13073	Cytochrome c oxidase subunit 4 isoform 1, mitochondrial OS=Homo sapiens GN=COX4I1 PE=1 SV=1	2	48.5	159.2	79.3	COX4I1	0.498116	-1.00545
Q6IBS0	Twinfilin-2 OS=Homo sapiens GN=TWF2 PE=1 SV=2	2	299.7	430	214.2	TWF2	0.49814	-1.00538
A8K2W7	cDNA FLJ78119, highly similar to Homo sapiens G1 to S phase transition 1 (GSPT1), mRNA OS=Homo sapiens PE=2 SV=1	2	460.5	523.6	261	GSPT1	0.498472	-1.00442
A0A087WUS0	40S ribosomal protein S24 OS=Homo sapiens GN=RPS24 PE=1 SV=1	2	325.7	868	432.7		0.498502	-1.00433
Q6PJV4	THRAP3 protein (Fragment) OS=Homo sapiens GN=THRAP3 PE=2 SV=1	2	21.3	33.7	16.8	THRAP3	0.498516	-1.00429
P21796	Voltage-dependent anion-selective channel protein 1 OS=Homo sapiens GN=VDAC1 PE=1 SV=2	2	20.6	35.1	17.5	VDAC1	0.498575	-1.00412
B3KQM3	Receptor-interacting serine/threonine-protein kinase 2 OS=Homo sapiens PE=2 SV=1	1	53.5	78.4	39.1	RIPK2	0.498724	-1.00369
Q96ME7	Zinc finger protein 512 OS=Homo sapiens GN=ZNF512 PE=1 SV=2	2	30.4	80	39.9	ZNF512	0.49875	-1.00361
P52701	DNA mismatch repair protein Msh6 OS=Homo sapiens GN=MSH6 PE=1 SV=2	2	78.7	167.8	83.7	MSH6	0.498808	-1.00344
P61086	Ubiquitin-conjugating enzyme E2 K OS=Homo sapiens GN=UBE2K PE=1 SV=3	2	31.2	47.3	23.6	UBE2K	0.498943	-1.00305
A8K7F6	cDNA FLJ78244, highly similar to Homo sapiens eukaryotic translation initiation factor 4A, isoform 1 (EIF4A1), mRNA OS=Homo sapiens PE=2 SV=1	2	1040.1	1452	724.6	EIF4A1	0.499036	-1.00278
P22695	Cytochrome b-c1 complex subunit 2, mitochondrial OS=Homo sapiens GN=UQCRC2 PE=1 SV=3	2	80.4	192.7	96.2	UQCRC2	0.499222	-1.00225
P49327	Fatty acid synthase OS=Homo sapiens GN=FASN PE=1 SV=3	2	2491.3	2235.2	1116.1	FASN	0.499329	-1.00194
Q6FIC5	Chloride intracellular channel protein OS=Homo sapiens GN=CLIC4 PE=2 SV=1	2	145.4	303.1	151.4	CLIC4	0.499505	-1.00143
O15056	Synaptojanin-2 OS=Homo sapiens GN=SYNJ2 PE=1 SV=3	2	195.3	325.3	162.5	SYNJ2	0.499539	-1.00133
B4DF60	cDNA FLJ55960, highly similar to Protein transport protein Sec23A OS=Homo sapiens PE=2 SV=1	2	57.2	28.4	14.2	SEC23A	0.5	-1
Q96T76	MMS19 nucleotide excision repair protein homolog OS=Homo sapiens GN=MMS19 PE=1 SV=2	2	36.4	63	31.5	MMS19	0.5	-1
L7RXH5	Mitogen-activated protein kinase OS=Homo sapiens GN=MAPK3 PE=2 SV=1	2	125.5	161.6	80.8	MAPK3	0.5	-1
A0A075B746	28S ribosomal protein S21, mitochondrial OS=Homo sapiens GN=MRPS21 PE=1 SV=1	2	16.8	42.8	21.4		0.5	-1
Q6DD88	Atlastin-3 OS=Homo sapiens GN=ATL3 PE=1 SV=1	2	10.2	21.4	10.7	ATL3	0.5	-1
A8MYK1	39S ribosomal protein L23, mitochondrial OS=Homo sapiens GN=MRPL23 PE=1 SV=1	2	7.5	21.4	10.7	MRPL23; LOC107987373	0.5	-1
Q02252	Methylmalonate-semialdehyde dehydrogenase [acylating], mitochondrial OS=Homo sapiens GN=ALDH6A1 PE=1 SV=2	1	8.1	28.8	14.4	ALDH6A1	0.5	-1
A8K9T3	cDNA FLJ76467, highly similar to Homo sapiens acyl-CoA synthetase long-chain family member 1 (ACSL1), mRNA OS=Homo sapiens PE=2 SV=1	1	3.1	11.6	5.8	ACSL1	0.5	-1
P26196	Probable ATP-dependent RNA helicase DDX6 OS=Homo sapiens GN=DDX6 PE=1 SV=2	2	361.4	645.5	322.8	DDX6	0.500077	-0.999777
A2RRC9	IQ motif containing GTPase activating protein 3 OS=Homo sapiens GN=IQGAP3 PE=1 SV=1	2	77.1	139.3	69.7	IQGAP3	0.500359	-0.998965
P23526	Adenosylhomocysteinase OS=Homo sapiens GN=AHCY PE=1 SV=4	2	1167.5	1679	840.3	AHCY	0.500476	-0.998626
J9R021	Eukaryotic translation initiation factor 3 subunit A OS=Homo sapiens GN=eIF3a PE=2 SV=1	2	831.4	1405.1	703.3	EIF3A	0.500534	-0.998461
B3KRM2	Serine/threonine-protein phosphatase OS=Homo sapiens PE=2 SV=1	2	211.9	417.3	209.2	PPP2CB	0.501318	-0.996202
Q53F62	ADP-ribosylation factor GTPase activating protein 1 isoform a variant (Fragment) OS=Homo sapiens PE=2 SV=1	2	48.6	102.7	51.5	ARFGAP1	0.501461	-0.995792
Q9Y2T2	AP-3 complex subunit mu-1 OS=Homo sapiens GN=AP3M1 PE=1 SV=1	2	81	183.2	91.9	AP3M1	0.501638	-0.995283
X6R4W8	BUB3-interacting and GLEBS motif-containing protein ZNF207 OS=Homo sapiens GN=ZNF207 PE=1 SV=1	2	37.9	60.6	30.4		0.50165	-0.995246
D3DWY7	Prefoldin subunit 3 OS=Homo sapiens GN=VBP1 PE=3 SV=1	2	178.3	802.1	402.4	VBP1	0.501683	-0.995152
A0A024R172	Leukotriene B4 12-hydroxydehydrogenase, isoform CRA_a OS=Homo sapiens GN=LTB4DH PE=4 SV=1	2	16	29.7	14.9	PTGR1	0.501684	-0.995151
Q96KG9	N-terminal kinase-like protein OS=Homo sapiens GN=SCYL1 PE=1 SV=1	2	136.7	171	85.8	SCYL1	0.501754	-0.994947
Q9Y3D3	28S ribosomal protein S16, mitochondrial OS=Homo sapiens GN=MRPS16 PE=1 SV=1	2	81.6	208.6	104.7	MRPS16	0.501918	-0.994478
P60673	Profilin-3 OS=Homo sapiens GN=PFN3 PE=2 SV=1	1	114.7	102.6	51.5	PFN3	0.501949	-0.994386
A8K1Z3	cDNA FLJ75002, highly similar to Homo sapiens, neural cell expressed,developmentally down-regulated gene 1 OS=Homo sapiens PE=2 SV=1	1	14.2	24.3	12.2	NEDD1	0.502058	-0.994075
E9KL35	Epididymis tissue sperm binding protein Li 3a OS=Homo sapiens PE=1 SV=1	2	437.3	983.1	493.6	GNB2L1; RACK1	0.502085	-0.993996
P10809	60 kDa heat shock protein, mitochondrial OS=Homo sapiens GN=HSPD1 PE=1 SV=2	2	488.4	1164.1	584.6	HSPD1	0.502191	-0.993693
Q59HH3	Trifunctional purine biosynthetic protein adenosine-3 (Fragment) OS=Homo sapiens PE=2 SV=1	2	653.3	726.7	365	GART	0.502271	-0.993463
A0A1B2JLU2	Retinitis pigmentosa 2 OS=Homo sapiens GN=RP2 PE=4 SV=1	1	25	64.1	32.2	RP2	0.50234	-0.993264
A6QKW0	SHINC3 OS=Homo sapiens GN=SHINC3 PE=2 SV=1	2	29.4	82.6	41.5	TMEM33	0.502421	-0.99303
P55212	Caspase-6 OS=Homo sapiens GN=CASP6 PE=1 SV=2	2	74.4	93.3	46.9	CASP6	0.50268	-0.992289
B3KMS0	Condensin complex subunit 1 OS=Homo sapiens PE=2 SV=1	2	52.3	87.1	43.8	NCAPD2	0.50287	-0.991742
B2RWN5	HEAT repeat containing 1 OS=Homo sapiens GN=HEATR1 PE=2 SV=1	1	7.1	15.9	8	HEATR1	0.503145	-0.990955
Q9NQX4	Unconventional myosin-Vc OS=Homo sapiens GN=MYO5C PE=1 SV=2	1	27.3	62.4	31.4	MYO5C	0.503205	-0.990781
Q9NYU1	UDP-glucose:glycoprotein glucosyltransferase 2 OS=Homo sapiens GN=UGGT2 PE=1 SV=4	2	20.2	68.7	34.6	UGGT2	0.503639	-0.989538
B2RD79	cDNA, FLJ96494, highly similar to Homo sapiens ubiquitin specific peptidase 14 (tRNA-guanine transglycosylase) (USP14), mRNA OS=Homo sapiens PE=2 SV=1	2	100.7	157.8	79.5	USP14	0.503802	-0.98907
B4DRL5	cDNA FLJ60834, highly similar to Engulfment and cell motility protein 2 (CED-12 homolog A) OS=Homo sapiens PE=2 SV=1	2	24.4	38.5	19.4	ELMO2	0.503896	-0.988802
A0A024RDZ2	CDC16 cell division cycle 16 homolog (S. cerevisiae), isoform CRA_a OS=Homo sapiens GN=CDC16 PE=4 SV=1	1	33.6	50	25.2	CDC16	0.504	-0.988504
J3KQE5	GTP-binding nuclear protein Ran (Fragment) OS=Homo sapiens GN=RAN PE=1 SV=1	2	457.4	895.4	451.6		0.504356	-0.987487
Q15785	Mitochondrial import receptor subunit TOM34 OS=Homo sapiens GN=TOMM34 PE=1 SV=2	2	96.6	182.2	91.9	TOMM34	0.504391	-0.987386
E7EVH7	Uncharacterized protein OS=Homo sapiens PE=4 SV=1	2	232.9	290.6	146.6		0.504474	-0.98715
A0A024R6N1	TNF receptor-associated factor 3, isoform CRA_a OS=Homo sapiens GN=TRAF3 PE=4 SV=1	1	22.7	44.6	22.5	TRAF3	0.504484	-0.987119
A8K2U2	cDNA FLJ75392, highly similar to Homo sapiens hexokinase II (HKII) mRNA OS=Homo sapiens PE=2 SV=1	2	52.7	102.2	51.6	HK2	0.504892	-0.985952
P12081	Histidine--tRNA ligase, cytoplasmic OS=Homo sapiens GN=HARS PE=1 SV=2	2	124.9	209.9	106.1	HARS	0.505479	-0.984278
Q86TI2	Dipeptidyl peptidase 9 OS=Homo sapiens GN=DPP9 PE=1 SV=3	2	139.2	108.8	55	DPP9	0.505515	-0.984175
P46776	60S ribosomal protein L27a OS=Homo sapiens GN=RPL27A PE=1 SV=2	2	305.2	611.2	309.1	RPL27A	0.505726	-0.983571
Q53GF9	Full-length cDNA 5-PRIME end of clone CS0DF013YM24 of Fetal brain of Homo sapiens (Human) variant (Fragment) OS=Homo sapiens PE=2 SV=1	2	30.6	68.6	34.7	TMED10	0.505831	-0.983273
Q01955	Collagen alpha-3(IV) chain OS=Homo sapiens GN=COL4A3 PE=1 SV=3	1	39.7	51.4	26	COL4A3	0.505837	-0.983257
B7Z6Z4	Myosin light polypeptide 6 OS=Homo sapiens GN=MYL6 PE=1 SV=1	2	924.3	1696.5	858.4	MYL6	0.505983	-0.982839
Q9H0L4	Cleavage stimulation factor subunit 2 tau variant OS=Homo sapiens GN=CSTF2T PE=1 SV=1	2	12.3	31.6	16	CSTF2T	0.506329	-0.981853
Q9H7E2	Tudor domain-containing protein 3 OS=Homo sapiens GN=TDRD3 PE=1 SV=1	2	60.1	129.9	65.8	TDRD3	0.506543	-0.981242
J3QQJ0	SAP30-binding protein (Fragment) OS=Homo sapiens GN=SAP30BP PE=1 SV=1	2	18.8	30.2	15.3		0.506623	-0.981017
O60336	Mitogen-activated protein kinase-binding protein 1 OS=Homo sapiens GN=MAPKBP1 PE=1 SV=4	1	29.8	84.8	43	MAPKBP1	0.507075	-0.979728
P25311	Zinc-alpha-2-glycoprotein OS=Homo sapiens GN=AZGP1 PE=1 SV=2	1	22	27.4	13.9	AZGP1	0.507299	-0.979091
O00469	Procollagen-lysine,2-oxoglutarate 5-dioxygenase 2 OS=Homo sapiens GN=PLOD2 PE=1 SV=2	2	112.3	485.5	246.5	PLOD2	0.507724	-0.977884
A0A024RAM0	Transportin 1, isoform CRA_a OS=Homo sapiens GN=TNPO1 PE=4 SV=1	2	244.1	474	240.7	TNPO1	0.507806	-0.977651
P05198	Eukaryotic translation initiation factor 2 subunit 1 OS=Homo sapiens GN=EIF2S1 PE=1 SV=3	2	306.5	538.5	273.5	EIF2S1	0.507892	-0.977406
A8K3H8	cDNA FLJ77680, highly similar to Homo sapiens protein phosphatase 2 (formerly 2A), regulatory subunit A (PR 65), alpha isoform (PPP2R1A), mRNA OS=Homo sapiens PE=2 SV=1	2	310.6	468.2	237.8	PPP2R1A	0.507903	-0.977376
B4E2I9	cDNA FLJ55486, highly similar to Semaphorin-3C OS=Homo sapiens PE=2 SV=1	1	21.4	56.5	28.7	SEMA3C	0.507965	-0.9772
A0A140VK70	Testis secretory sperm-binding protein Li 197a OS=Homo sapiens PE=2 SV=1	2	277.4	656.1	333.3	PSMC2	0.508002	-0.977094
P60228	Eukaryotic translation initiation factor 3 subunit E OS=Homo sapiens GN=EIF3E PE=1 SV=1	2	231.5	385.4	195.8	EIF3E	0.508044	-0.976976
A0A024R6D4	Enhancer of rudimentary homolog OS=Homo sapiens GN=ERH PE=3 SV=1	2	173.3	254.5	129.3	ERH	0.508055	-0.976943
B2R6S9	cDNA, FLJ93097, highly similar to Homo sapiens low density lipoprotein receptor-related protein associated protein 1 (LRPAP1), mRNA OS=Homo sapiens PE=2 SV=1	2	30.5	67.9	34.5	LRPAP1	0.5081	-0.976815
A0A024RCJ8	HCG1821276, isoform CRA_a OS=Homo sapiens GN=hCG_1821276 PE=4 SV=1	2	162.7	218	110.8	PPP1R18	0.508257	-0.97637
Q9NVR2	Integrator complex subunit 10 OS=Homo sapiens GN=INTS10 PE=1 SV=2	1	29.5	35.6	18.1	INTS10	0.508427	-0.975888
Q9Y6G9	Cytoplasmic dynein 1 light intermediate chain 1 OS=Homo sapiens GN=DYNC1LI1 PE=1 SV=3	2	146.7	224.2	114	DYNC1LI1	0.508475	-0.975752
P13797	Plastin-3 OS=Homo sapiens GN=PLS3 PE=1 SV=4	2	218.2	316.9	161.2	PLS3	0.508678	-0.975176
B8ZX62	Plasminogen activator OS=Homo sapiens GN=PLAT PE=2 SV=1	2	209.6	327.5	166.6	PLAT	0.508702	-0.975107
A0A024R374	Cathepsin B, isoform CRA_a OS=Homo sapiens GN=CTSB PE=3 SV=1	2	68.7	301.5	153.4	CTSB	0.508789	-0.97486
A0A0J9YXC7	LIM and senescent cell antigen-like-containing domain protein OS=Homo sapiens GN=LIMS4 PE=1 SV=1	2	13.8	22.2	11.3	LOC729260; LIMS3L; LIMS4	0.509009	-0.974237
Q15019	Septin-2 OS=Homo sapiens GN=SEPT2 PE=1 SV=1	2	331.7	442	225	SEPT2	0.50905	-0.974121
Q96Q42	Alsin OS=Homo sapiens GN=ALS2 PE=1 SV=2	1	37.8	49.3	25.1	ALS2	0.509128	-0.9739
Q9NZM1	Myoferlin OS=Homo sapiens GN=MYOF PE=1 SV=1	2	2859.2	4637.5	2362.6	MYOF	0.509456	-0.972972
Q8IVB5	LIX1-like protein OS=Homo sapiens GN=LIX1L PE=2 SV=1	1	11.1	26.1	13.3	LIX1L; LOC101060547	0.509579	-0.972624
Q9Y4L1	Hypoxia up-regulated protein 1 OS=Homo sapiens GN=HYOU1 PE=1 SV=1	2	93.5	205.2	104.6	HYOU1	0.509747	-0.972148
A0A024RD93	Phosphoribosylaminoimidazole carboxylase, phosphoribosylaminoimidazole succinocarboxamide synthetase, isoform CRA_c OS=Homo sapiens GN=PAICS PE=3 SV=1	2	450.6	563.8	287.4	PAICS	0.509755	-0.972123
Q9Y315	Deoxyribose-phosphate aldolase OS=Homo sapiens GN=DERA PE=1 SV=2	2	34.9	60.2	30.7	DERA	0.509967	-0.971525
A0A024R8Y0	Cell division cycle associated 1, isoform CRA_a OS=Homo sapiens GN=CDCA1 PE=4 SV=1	2	84.8	69.2	35.3	NUF2	0.510116	-0.971104
Q5EC54	Heterogeneous nuclear ribonucleoprotein K transcript variant OS=Homo sapiens GN=HNRPK PE=2 SV=1	2	807.7	1666	849.9	HNRNPK	0.510144	-0.971023
B4DR61	Protein transport protein Sec61 subunit alpha isoform 1 OS=Homo sapiens GN=SEC61A1 PE=1 SV=1	2	73.9	221.1	112.8	SEC61A1	0.510176	-0.970932
E9PI41	Exosome complex component RRP41 (Fragment) OS=Homo sapiens GN=EXOSC4 PE=1 SV=8	2	27.2	49	25		0.510204	-0.970854
Q9NP61	ADP-ribosylation factor GTPase-activating protein 3 OS=Homo sapiens GN=ARFGAP3 PE=1 SV=1	2	85.5	97.2	49.6	ARFGAP3	0.510288	-0.970616
P52298	Nuclear cap-binding protein subunit 2 OS=Homo sapiens GN=NCBP2 PE=1 SV=1	2	38.6	68	34.7	NCBP2	0.510294	-0.970599
Q13098	COP9 signalosome complex subunit 1 OS=Homo sapiens GN=GPS1 PE=1 SV=4	2	367.2	510.9	260.8	GPS1	0.510472	-0.970097
Q9Y520	Protein PRRC2C OS=Homo sapiens GN=PRRC2C PE=1 SV=4	2	716.6	1231.2	628.5	PRRC2C	0.510478	-0.97008
Q99543	DnaJ homolog subfamily C member 2 OS=Homo sapiens GN=DNAJC2 PE=1 SV=4	2	25.4	42.9	21.9	DNAJC2	0.51049	-0.970047
Q9UBQ5	Eukaryotic translation initiation factor 3 subunit K OS=Homo sapiens GN=EIF3K PE=1 SV=1	2	60.2	94.6	48.3	EIF3K	0.510571	-0.969817
A0A024R0C7	CTTNBP2 N-terminal like, isoform CRA_b OS=Homo sapiens GN=CTTNBP2NL PE=4 SV=1	1	17.2	37.4	19.1	CTTNBP2NL	0.510695	-0.969466
Q5STK2	Prefoldin subunit 6, isoform CRA_b OS=Homo sapiens GN=PFDN6 PE=2 SV=1	2	115.7	473.8	242.1	PFDN6	0.510975	-0.968675
P23246	Splicing factor, proline- and glutamine-rich OS=Homo sapiens GN=SFPQ PE=1 SV=2	2	1312.9	1746.3	892.8	SFPQ	0.511252	-0.967892
E7EN19	Mitogen-activated protein kinase kinase kinase kinase 4 OS=Homo sapiens GN=MAP4K4 PE=1 SV=1	2	149.9	347.7	177.8		0.51136	-0.967588
Q8WWY3	U4/U6 small nuclear ribonucleoprotein Prp31 OS=Homo sapiens GN=PRPF31 PE=1 SV=2	2	15.3	30.5	15.6	PRPF31	0.511475	-0.967263
A0A140VJL8	Inositol-1-monophosphatase OS=Homo sapiens PE=2 SV=1	2	27.7	49.4	25.3	IMPA1	0.512146	-0.965374
P23284	Peptidyl-prolyl cis-trans isomerase B OS=Homo sapiens GN=PPIB PE=1 SV=2	2	453.5	1001.5	513.4	PPIB	0.512631	-0.964007
A0A087X117	Nodal modulator 1 OS=Homo sapiens GN=NOMO1 PE=1 SV=1	2	50.7	131	67.2		0.512977	-0.963034
H0UID3	AP complex subunit beta OS=Homo sapiens GN=AP2B1 PE=3 SV=1	2	763.7	1736.2	890.7	AP2B1	0.513017	-0.962922
Q9Y2A7	Nck-associated protein 1 OS=Homo sapiens GN=NCKAP1 PE=1 SV=1	2	245	365.4	187.5	NCKAP1	0.513136	-0.962586
Q96KB5	Lymphokine-activated killer T-cell-originated protein kinase OS=Homo sapiens GN=PBK PE=1 SV=3	1	24.2	30.2	15.5	PBK	0.513245	-0.96228
P17936	Insulin-like growth factor-binding protein 3 OS=Homo sapiens GN=IGFBP3 PE=1 SV=2	1	38.3	85.3	43.8	IGFBP3	0.513482	-0.961615
P38432	Coilin OS=Homo sapiens GN=COIL PE=1 SV=1	1	33.2	59.2	30.4	COIL	0.513514	-0.961526
P43246	DNA mismatch repair protein Msh2 OS=Homo sapiens GN=MSH2 PE=1 SV=1	2	111.3	187.1	96.1	MSH2	0.513629	-0.961201
P61081	NEDD8-conjugating enzyme Ubc12 OS=Homo sapiens GN=UBE2M PE=1 SV=1	2	68.1	168	86.3	UBE2M	0.51369	-0.961029
A8K8N7	Phosphoribosylformylglycinamidine synthase (FGAR amidotransferase), isoform CRA_b OS=Homo sapiens GN=PFAS PE=2 SV=1	2	229.7	271.6	139.6	PFAS	0.513991	-0.960185
B2R4V2	cDNA, FLJ92227, highly similar to Homo sapiens ribosomal protein L36a-like (RPL36AL), mRNA OS=Homo sapiens PE=2 SV=1	2	19.4	32.1	16.5	RPL36AL	0.514019	-0.960107
A0A1C7CYX9	Dihydropyrimidinase-related protein 2 OS=Homo sapiens GN=DPYSL2 PE=1 SV=1	2	2263.2	2619	1346.4	DPYSL2	0.514089	-0.959909
Q9NRN7	L-aminoadipate-semialdehyde dehydrogenase-phosphopantetheinyl transferase OS=Homo sapiens GN=AASDHPPT PE=1 SV=2	2	31.2	53.1	27.3	AASDHPPT	0.514124	-0.959811
P62851	40S ribosomal protein S25 OS=Homo sapiens GN=RPS25 PE=1 SV=1	2	220	515.3	265	RPS25	0.514264	-0.95942
Q8IX04	Ubiquitin-conjugating enzyme E2 variant 3 OS=Homo sapiens GN=UEVLD PE=1 SV=2	2	30.3	28	14.4	UEVLD	0.514286	-0.959358
A0A024R8U1	Solute carrier family 16 (Monocarboxylic acid transporters), member 3, isoform CRA_a OS=Homo sapiens GN=SLC16A3 PE=4 SV=1	1	246.7	1000.4	514.7	SLC16A3	0.514494	-0.958773
Q15058	Kinesin-like protein KIF14 OS=Homo sapiens GN=KIF14 PE=1 SV=1	1	45.8	67.8	34.9	KIF14	0.514749	-0.958058
B3KU03	cDNA FLJ39022 fis, clone NT2RP7003724, weakly similar to Serine/arginine repetitive matrix protein 1 OS=Homo sapiens PE=2 SV=1	2	9.3	19.6	10.1	MAP7D1	0.515306	-0.956498
P35080	Profilin-2 OS=Homo sapiens GN=PFN2 PE=1 SV=3	2	488.1	857.9	442.5	PFN2	0.515794	-0.955132
P02749	Beta-2-glycoprotein 1 OS=Homo sapiens GN=APOH PE=1 SV=3	1	15.1	43.6	22.5	APOH	0.516055	-0.954403
B2RCP7	cDNA, FLJ96197, highly similar to Homo sapiens connective tissue growth factor (CTGF), mRNA OS=Homo sapiens PE=2 SV=1	2	9.1	18.6	9.6	CTGF	0.516129	-0.954196
P62917	60S ribosomal protein L8 OS=Homo sapiens GN=RPL8 PE=1 SV=2	2	267.7	628.9	324.6	RPL8	0.516139	-0.954168
Q9BR76	Coronin-1B OS=Homo sapiens GN=CORO1B PE=1 SV=1	2	167.5	278.2	143.7	CORO1B	0.516535	-0.953062
A2A3R6	40S ribosomal protein S6 OS=Homo sapiens GN=RPS6 PE=2 SV=1	2	513.1	1230.6	636	RPS6	0.516821	-0.952263
Q9Y230	RuvB-like 2 OS=Homo sapiens GN=RUVBL2 PE=1 SV=3	2	332.8	1028.2	531.6	RUVBL2	0.51702	-0.951708
Q9ULC4	Malignant T-cell-amplified sequence 1 OS=Homo sapiens GN=MCTS1 PE=1 SV=1	2	32	52.4	27.1	MCTS1	0.517176	-0.951274
A0A024R7B7	CDC37 cell division cycle 37 homolog (S. cerevisiae), isoform CRA_a OS=Homo sapiens GN=CDC37 PE=4 SV=1	2	203.5	1015.7	525.4	CDC37	0.517279	-0.950986
O60488	Long-chain-fatty-acid--CoA ligase 4 OS=Homo sapiens GN=ACSL4 PE=1 SV=2	2	63.8	109.8	56.8	ACSL4	0.517304	-0.950915
A8K259	cDNA FLJ78501, highly similar to Homo sapiens serpin peptidase inhibitor, clade H (heat shock protein 47), member 1, (collagen binding protein 1) (SERPINH1), mRNA OS=Homo sapiens PE=2 SV=1	2	61.8	192.5	99.6	SERPINH1	0.517403	-0.950641
A0A0K0K1L8	Epididymis secretory sperm binding protein Li 129m OS=Homo sapiens GN=HEL-S-129m PE=2 SV=1	2	439.3	690.4	357.4	PSME1	0.517671	-0.949893
Q2M1P5	Kinesin-like protein KIF7 OS=Homo sapiens GN=KIF7 PE=1 SV=2	1	76.8	175.4	90.8	KIF7	0.517674	-0.949885
P61513	60S ribosomal protein L37a OS=Homo sapiens GN=RPL37A PE=1 SV=2	2	203.1	446.4	231.2	RPL37A	0.517921	-0.949196
P27694	Replication protein A 70 kDa DNA-binding subunit OS=Homo sapiens GN=RPA1 PE=1 SV=2	2	189.4	258.7	134	RPA1	0.517974	-0.949047
Q53HB3	Proteasome 26S ATPase subunit 1 variant (Fragment) OS=Homo sapiens PE=1 SV=1	2	209.6	445.6	230.9	PSMC1	0.518178	-0.948481
O60664	Perilipin-3 OS=Homo sapiens GN=PLIN3 PE=1 SV=3	2	180.5	315	163.3	PLIN3	0.518413	-0.947827
Q8NBF2	NHL repeat-containing protein 2 OS=Homo sapiens GN=NHLRC2 PE=1 SV=1	2	107.1	156.8	81.3	NHLRC2	0.518495	-0.947598
A0A024RAE1	Ribosome assembly factor mrt4 OS=Homo sapiens GN=C1orf33 PE=3 SV=1	2	15.7	32.4	16.8	MRTO4	0.518519	-0.947533
A8K0T9	cDNA FLJ75422, highly similar to Homo sapiens capping protein (actin filament) muscle Z-line, alpha 1, mRNA OS=Homo sapiens PE=2 SV=1	2	267.8	452.4	234.6	CAPZA1	0.518568	-0.947396
Q8N766	ER membrane protein complex subunit 1 OS=Homo sapiens GN=EMC1 PE=1 SV=1	1	16.4	34.9	18.1	EMC1	0.518625	-0.947237
Q14257	Reticulocalbin-2 OS=Homo sapiens GN=RCN2 PE=1 SV=1	2	207.4	622.7	323	RCN2	0.518709	-0.947003
Q5U043	S-(hydroxymethyl)glutathione dehydrogenase OS=Homo sapiens PE=2 SV=1	2	152.5	263.7	136.8	ADH5	0.518771	-0.946829
D3DUZ3	Interferon, gamma-inducible protein 16, isoform CRA_a OS=Homo sapiens GN=IFI16 PE=4 SV=1	2	531.9	898.5	466.2	IFI16	0.518865	-0.946569
C9JEH3	Angio-associated migratory cell protein OS=Homo sapiens GN=AAMP PE=1 SV=1	1	29.1	63.2	32.8	AAMP	0.518987	-0.946229
P53618	Coatomer subunit beta OS=Homo sapiens GN=COPB1 PE=1 SV=3	2	611.5	974.5	506	COPB1	0.519241	-0.945525
A0A024R1U2	PHD finger protein 5A, isoform CRA_a OS=Homo sapiens GN=PHF5A PE=4 SV=1	2	60.9	102	53	PHF5A	0.519608	-0.944505
B4E3D4	cDNA FLJ56293, highly similar to Transmembrane glycoprotein NMB OS=Homo sapiens PE=2 SV=1	2	30.1	89.1	46.3	GPNMB	0.519641	-0.944413
Q58FF8	Putative heat shock protein HSP 90-beta 2 OS=Homo sapiens GN=HSP90AB2P PE=1 SV=2	1	7.2	37.9	19.7	HSP90AB2P	0.519789	-0.944002
A0A090N8P3	Peptidylprolyl isomerase OS=Homo sapiens GN=FKBP9 PE=4 SV=1	2	76.6	284.3	147.8	FKBP9	0.519873	-0.943768
O14646	Chromodomain-helicase-DNA-binding protein 1 OS=Homo sapiens GN=CHD1 PE=1 SV=2	1	63.5	95.4	49.6	CHD1	0.519916	-0.943649
O15511	Actin-related protein 2/3 complex subunit 5 OS=Homo sapiens GN=ARPC5 PE=1 SV=3	2	81	137.5	71.5	ARPC5	0.52	-0.943416
Q9NXV6	CDKN2A-interacting protein OS=Homo sapiens GN=CDKN2AIP PE=1 SV=3	2	96.4	63.4	33	CDKN2AIP	0.520505	-0.942017
A8K9U0	cDNA FLJ78260, highly similar to Homo sapiens RNA binding motif protein 4, mRNA OS=Homo sapiens PE=2 SV=1	2	109.2	216.9	112.9		0.520516	-0.941985
E9PGC5	Receptor-type tyrosine-protein phosphatase kappa OS=Homo sapiens GN=PTPRK PE=1 SV=1	2	12.9	26.7	13.9		0.520599	-0.941755
Q9BTV4	Transmembrane protein 43 OS=Homo sapiens GN=TMEM43 PE=1 SV=1	2	16.8	31.5	16.4	TMEM43	0.520635	-0.941656
Q8N5D0	WD and tetratricopeptide repeats protein 1 OS=Homo sapiens GN=WDTC1 PE=1 SV=2	1	61.5	98.1	51.1	WDTC1	0.520897	-0.94093
A0A087X2I1	26S proteasome regulatory subunit 10B OS=Homo sapiens GN=PSMC6 PE=1 SV=1	2	159.7	336.2	175.3	PSMC6	0.521416	-0.939494
P49588	Alanine--tRNA ligase, cytoplasmic OS=Homo sapiens GN=AARS PE=1 SV=2	2	198.7	253.2	132.1	AARS	0.521722	-0.938647
Q59EK3	Adaptor-related protein complex 1, mu 1 subunit variant (Fragment) OS=Homo sapiens PE=2 SV=1	2	101.3	135.3	70.7	AP1M1	0.522542	-0.93638
Q8WWQ0	PH-interacting protein OS=Homo sapiens GN=PHIP PE=1 SV=2	1		46.5	24.3	PHIP	0.522581	-0.936274
B2RAY1	cDNA, FLJ95184, highly similar to Homo sapiens signal transducing adaptor molecule (SH3 domain and ITAM motif) 1 (STAM), mRNA OS=Homo sapiens PE=2 SV=1	2	55.8	92.2	48.2	STAM	0.522777	-0.935734
A0A087WXU3	Extended synaptotagmin-2 OS=Homo sapiens GN=ESYT2 PE=1 SV=1	2	26.9	65.6	34.3		0.522866	-0.935487
B4DKM0	cDNA FLJ51883, highly similar to Mitochondrial 39S ribosomal protein L3 OS=Homo sapiens PE=2 SV=1	2	77.1	181	94.7	MRPL3	0.523204	-0.934553
B4DZF2	cDNA FLJ59571, highly similar to Eukaryotic translation initiation factor 4gamma 2 OS=Homo sapiens PE=2 SV=1	2	191.4	242.8	127.1	EIF4G2	0.523476	-0.933804
P00492	Hypoxanthine-guanine phosphoribosyltransferase OS=Homo sapiens GN=HPRT1 PE=1 SV=2	2	108.4	49.6	26	HPRT1	0.524194	-0.931828
Q96CS3	FAS-associated factor 2 OS=Homo sapiens GN=FAF2 PE=1 SV=2	2	26.2	57.8	30.3	FAF2	0.524221	-0.931752
J3KNQ4	Alpha-parvin OS=Homo sapiens GN=PARVA PE=1 SV=1	2	99.3	165	86.5	PARVA	0.524242	-0.931694
tr	GFP GFP	2	20981.5	618.9	324.6		0.524479	-0.931043
A8KA19	cDNA FLJ75831, highly similar to Homo sapiens exportin, tRNA (nuclear export receptor for tRNAs) (XPOT), mRNA OS=Homo sapiens PE=2 SV=1	2	104.2	174.4	91.5	XPOT	0.524656	-0.930556
A0A024R0Q5	Protein phosphatase 1, regulatory (Inhibitor) subunit 13 like, isoform CRA_a OS=Homo sapiens GN=PPP1R13L PE=4 SV=1	2	170.4	270	141.7	PPP1R13L	0.524815	-0.93012
B2RBR9	cDNA, FLJ95650, highly similar to Homo sapiens karyopherin (importin) beta 1 (KPNB1), mRNA OS=Homo sapiens PE=2 SV=1	2	350.9	615.1	323	KPNB1	0.525118	-0.929287
B3KWN0	cDNA FLJ43389 fis, clone OCBBF2007068, highly similar to Ankyrin repeat domain-containing protein 52 OS=Homo sapiens PE=2 SV=1	1	50.6	83.2	43.7	ANKRD52	0.52524	-0.92895
B2RDP6	cDNA, FLJ96709, highly similar to Homo sapiens glutamate rich WD repeat protein GRWD (GRWD), mRNA OS=Homo sapiens PE=2 SV=1	2	35.9	81.1	42.6	GRWD1	0.525277	-0.928848
P31153	S-adenosylmethionine synthase isoform type-2 OS=Homo sapiens GN=MAT2A PE=1 SV=1	2	570.3	609	319.9	MAT2A	0.525287	-0.928821
B3KXW5	cDNA FLJ46199 fis, clone TESTI4007965, highly similar to AP-1 complex subunit gamma-1 OS=Homo sapiens PE=2 SV=1	2	33.5	51.4	27	AP1G1	0.525292	-0.928809
P29317	Ephrin type-A receptor 2 OS=Homo sapiens GN=EPHA2 PE=1 SV=2	2	63.5	97.2	51.1	EPHA2	0.52572	-0.927633
A0A140VKA9	Testis secretory sperm-binding protein Li 236P OS=Homo sapiens PE=2 SV=1	2	48.6	79.5	41.8	QDPR	0.525786	-0.927452
B3KSH1	Eukaryotic translation initiation factor 3 subunit F OS=Homo sapiens GN=EIF3F PE=2 SV=1	2	60.7	110.3	58	EIF3F	0.525839	-0.927308
B2R761	cDNA, FLJ93299, highly similar to Homo sapiens sterol carrier protein 2 (SCP2), mRNA OS=Homo sapiens PE=2 SV=1	2	71.4	197.9	104.1	SCP2	0.526023	-0.926802
Q53Z07	NPC-A-16 OS=Homo sapiens GN=RPL9 PE=2 SV=1	2	233.7	497.5	261.7	RPL9	0.52603	-0.926783
P50570	Dynamin-2 OS=Homo sapiens GN=DNM2 PE=1 SV=2	2	132.7	162.5	85.5	DNM2	0.526154	-0.926443
F8W6C2	SPATS2-like protein (Fragment) OS=Homo sapiens GN=SPATS2L PE=1 SV=8	2	6.9	13.3	7		0.526316	-0.925999
O43156	TELO2-interacting protein 1 homolog OS=Homo sapiens GN=TTI1 PE=1 SV=3	1	9.5	13.3	7	TTI1	0.526316	-0.925999
O43318	Mitogen-activated protein kinase kinase kinase 7 OS=Homo sapiens GN=MAP3K7 PE=1 SV=1	1	40.1	62.3	32.8	MAP3K7	0.526485	-0.925536
B5LY71	Uridine monophosphate synthetase isoform I OS=Homo sapiens GN=UMPS PE=2 SV=1	2	24.2	52.8	27.8	UMPS	0.526515	-0.925453
Q9Y3F4	Serine-threonine kinase receptor-associated protein OS=Homo sapiens GN=STRAP PE=1 SV=1	2	423.7	569.6	300	STRAP	0.526685	-0.924987
P30048	Thioredoxin-dependent peroxide reductase, mitochondrial OS=Homo sapiens GN=PRDX3 PE=1 SV=3	2	76.7	158.5	83.5	PRDX3	0.526814	-0.924635
V9HW00	Epididymis secretory sperm binding protein Li 77p (Fragment) OS=Homo sapiens GN=HEL-S-77p PE=2 SV=1	2	126.1	218.4	115.1	CSNK1A1	0.527015	-0.924085
Q9ULT8	E3 ubiquitin-protein ligase HECTD1 OS=Homo sapiens GN=HECTD1 PE=1 SV=3	1	247.5	408	215.1	HECTD1	0.527206	-0.923562
Q8NHP6	Motile sperm domain-containing protein 2 OS=Homo sapiens GN=MOSPD2 PE=1 SV=1	1	211.2	29.2	15.4	MOSPD2	0.527397	-0.923038
A0A060VCV0	MHC class I antigen OS=Homo sapiens GN=HLA-C PE=3 SV=1	2	18	78.1	41.2	HLA-C	0.527529	-0.922678
Q92945	Far upstream element-binding protein 2 OS=Homo sapiens GN=KHSRP PE=1 SV=4	1	482.9	910.4	480.3	KHSRP	0.52757	-0.922565
Q9HD45	Transmembrane 9 superfamily member 3 OS=Homo sapiens GN=TM9SF3 PE=1 SV=2	2	16.2	40.9	21.6	TM9SF3	0.528117	-0.92107
Q86VS8	Protein Hook homolog 3 OS=Homo sapiens GN=HOOK3 PE=1 SV=2	2	49.7	71	37.5	HOOK3	0.528169	-0.920928
B7Z6M0	Peptidylprolyl isomerase OS=Homo sapiens PE=2 SV=1	2	195.7	521	275.2	FKBP8	0.528215	-0.920803
Q52LW3	Rho GTPase-activating protein 29 OS=Homo sapiens GN=ARHGAP29 PE=1 SV=2	2	337.3	534.2	282.3	ARHGAP29	0.528454	-0.920151
O60271	C-Jun-amino-terminal kinase-interacting protein 4 OS=Homo sapiens GN=SPAG9 PE=1 SV=4	2	107.1	233.1	123.2	SPAG9	0.528529	-0.919947
Q96AG4	Leucine-rich repeat-containing protein 59 OS=Homo sapiens GN=LRRC59 PE=1 SV=1	2	160.2	277.7	146.8	LRRC59	0.528628	-0.919675
P54819	Adenylate kinase 2, mitochondrial OS=Homo sapiens GN=AK2 PE=1 SV=2	2	64.8	123.9	65.5	AK2	0.528652	-0.919609
A0A140VJZ1	Ubiquitinyl hydrolase 1 OS=Homo sapiens PE=2 SV=1	2	131.6	245.5	129.8	USP5	0.528717	-0.919433
Q53R19	Arp2/3 complex 34 kDa subunit OS=Homo sapiens GN=ARPC2 PE=2 SV=1	2	500.2	683.8	361.6	ARPC2	0.52881	-0.91918
A0A024RAM4	Microtubule-associated protein 1B, isoform CRA_b OS=Homo sapiens GN=MAP1B PE=4 SV=1	2	1415.7	2386.3	1261.9	MAP1B	0.52881	-0.919178
P62136	Serine/threonine-protein phosphatase PP1-alpha catalytic subunit OS=Homo sapiens GN=PPP1CA PE=1 SV=1	2	315.1	570	301.5	PPP1CA	0.528947	-0.918804
Q9H6Y2	WD repeat-containing protein 55 OS=Homo sapiens GN=WDR55 PE=1 SV=2	1	17	27.6	14.6	WDR55	0.528986	-0.9187
A0A1W2PS05	Phosphatidylinositol 3-kinase catalytic subunit type 3 OS=Homo sapiens GN=PIK3C3 PE=1 SV=1	2	11.7	18.9	10		0.529101	-0.918386
P62701	40S ribosomal protein S4, X isoform OS=Homo sapiens GN=RPS4X PE=1 SV=2	2	688.8	1526.2	808.1	RPS4X	0.529485	-0.917338
B2RDH6	cDNA, FLJ96613, highly similar to Homo sapiens vacuolar protein sorting 33A (yeast) (VPS33A), mRNA OS=Homo sapiens PE=2 SV=1	2	15.9	35.5	18.8	VPS33A	0.529577	-0.917086
P17980	26S proteasome regulatory subunit 6A OS=Homo sapiens GN=PSMC3 PE=1 SV=3	2	199.1	456.5	241.8	PSMC3	0.529682	-0.916801
Q96PU4	E3 ubiquitin-protein ligase UHRF2 OS=Homo sapiens GN=UHRF2 PE=1 SV=1	2	78.1	124.5	66	UHRF2	0.53012	-0.915608
P61927	60S ribosomal protein L37 OS=Homo sapiens GN=RPL37 PE=1 SV=2	2	166.8	385.7	204.5	RPL37	0.530205	-0.915378
Q7Z417	Nuclear fragile X mental retardation-interacting protein 2 OS=Homo sapiens GN=NUFIP2 PE=1 SV=1	2	40.4	70.9	37.6	NUFIP2	0.530324	-0.915053
A8K3Y5	cDNA FLJ78186 OS=Homo sapiens PE=2 SV=1	2	131.5	338.3	179.5	LYAR	0.530594	-0.914319
P23396	40S ribosomal protein S3 OS=Homo sapiens GN=RPS3 PE=1 SV=2	2	1317	3012.3	1598.4	RPS3	0.530624	-0.914237
B4DPV7	cDNA FLJ54534, highly similar to Homo sapiens cysteinyl-tRNA synthetase (CARS), transcript variant 3, mRNA OS=Homo sapiens PE=2 SV=1	2	32.9	45.6	24.2	CARS	0.530702	-0.914027
A0A0A0MQX8	Muscleblind-like protein 1 OS=Homo sapiens GN=MBNL1 PE=1 SV=1	2	149	279.8	148.5	MBNL1	0.530736	-0.913933
Q9BRJ6	Uncharacterized protein C7orf50 OS=Homo sapiens GN=C7orf50 PE=1 SV=1	2	114.8	256.6	136.3	C7orf50	0.531177	-0.912736
Q13185	Chromobox protein homolog 3 OS=Homo sapiens GN=CBX3 PE=1 SV=4	2	196.1	351.9	187	CBX3; C15orf57; CCDC32	0.531401	-0.912127
B4DYZ7	cDNA FLJ54316, highly similar to DNA polymerase subunit delta 3 OS=Homo sapiens PE=2 SV=1	2	62.4	68.3	36.3	POLD3	0.531479	-0.911916
Q9BWH6	RNA polymerase II-associated protein 1 OS=Homo sapiens GN=RPAP1 PE=1 SV=3	2	13.5	25.2	13.4	RPAP1	0.531746	-0.911191
P0C7X5	Zinc finger protein 806 OS=Homo sapiens GN=ZNF806 PE=3 SV=1	1	59.6	122.6	65.2	ZNF806	0.531811	-0.911015
Q6NS36	Ferritin (Fragment) OS=Homo sapiens GN=FTH1 PE=2 SV=1	2	30.2	57.9	30.8	FTH1	0.531952	-0.910633
P61254	60S ribosomal protein L26 OS=Homo sapiens GN=RPL26 PE=1 SV=1	2	286.6	631.8	336.1	RPL26	0.531972	-0.910577
Q8NBJ5	Procollagen galactosyltransferase 1 OS=Homo sapiens GN=COLGALT1 PE=1 SV=1	2	70.5	157.5	83.8	COLGALT1; GLT25D1	0.532063	-0.91033
Q59EL2	COP9 constitutive photomorphogenic homolog subunit 2 variant (Fragment) OS=Homo sapiens PE=2 SV=1	2	234.6	361.7	192.5	COPS2	0.532209	-0.909935
Q15042	Rab3 GTPase-activating protein catalytic subunit OS=Homo sapiens GN=RAB3GAP1 PE=1 SV=3	2	60.2	90	47.9	RAB3GAP1	0.532222	-0.909899
P49915	GMP synthase [glutamine-hydrolyzing] OS=Homo sapiens GN=GMPS PE=1 SV=1	2	359.1	418	222.5	GMPS	0.532297	-0.909698
B0QZ18	Copine-1 OS=Homo sapiens GN=CPNE1 PE=1 SV=1	2	91.3	162.5	86.5	CPNE1	0.532308	-0.909668
Q15046	Lysine--tRNA ligase OS=Homo sapiens GN=KARS PE=1 SV=3	2	466.8	666.2	354.7	KARS	0.532423	-0.909356
Q9GZR7	ATP-dependent RNA helicase DDX24 OS=Homo sapiens GN=DDX24 PE=1 SV=1	2	95.5	209.6	111.6	DDX24	0.532443	-0.909302
O43719	HIV Tat-specific factor 1 OS=Homo sapiens GN=HTATSF1 PE=1 SV=1	2	51.2	86.2	45.9	HTATSF1	0.532483	-0.909194
O14641	Segment polarity protein dishevelled homolog DVL-2 OS=Homo sapiens GN=DVL2 PE=1 SV=1	2	43.9	81.1	43.2	DVL2	0.532676	-0.908671
Q6IA86	Elongator complex protein 2 OS=Homo sapiens GN=ELP2 PE=1 SV=2	2	19.4	32.1	17.1	ELP2	0.53271	-0.908577
Q9Y376	Calcium-binding protein 39 OS=Homo sapiens GN=CAB39 PE=1 SV=1	2	55.7	87.1	46.4	CAB39	0.532721	-0.908548
Q6AWA4	Uncharacterized protein DKFZp686O0870 (Fragment) OS=Homo sapiens GN=DKFZp686O0870 PE=2 SV=1	1	62.1	102.3	54.5	GTF3C1	0.532747	-0.908478
Q9H832	Ubiquitin-conjugating enzyme E2 Z OS=Homo sapiens GN=UBE2Z PE=1 SV=2	2	34.1	56.1	29.9	UBE2Z	0.532977	-0.907855
Q66LE6	Serine/threonine-protein phosphatase 2A 55 kDa regulatory subunit B delta isoform OS=Homo sapiens GN=PPP2R2D PE=1 SV=1	2	72.5	58.5	31.2	PPP2R2D	0.533333	-0.906891
P35221	Catenin alpha-1 OS=Homo sapiens GN=CTNNA1 PE=1 SV=1	2	89.9	99	52.8	CTNNA1	0.533333	-0.906891
Q9BQ39	ATP-dependent RNA helicase DDX50 OS=Homo sapiens GN=DDX50 PE=1 SV=1	2	128.5	203.6	108.6	DDX50	0.533399	-0.906713
A0A0K2GN21	BCKDHB protein OS=Homo sapiens GN=BCKDHB PE=4 SV=1	2	30.3	145.8	77.8	BCKDHB	0.533608	-0.906149
P35606	Coatomer subunit beta' OS=Homo sapiens GN=COPB2 PE=1 SV=2	2	1015.1	1672.4	892.5	COPB2	0.533664	-0.905996
Q9UJW0	Dynactin subunit 4 OS=Homo sapiens GN=DCTN4 PE=1 SV=1	2	135.4	225.3	120.3	DCTN4	0.533955	-0.905211
Q8IWV7	E3 ubiquitin-protein ligase UBR1 OS=Homo sapiens GN=UBR1 PE=1 SV=1	1	19.5	30.9	16.5	UBR1	0.533981	-0.905141
A0A024R608	Ribosomal protein, large, P1, isoform CRA_a OS=Homo sapiens GN=RPLP1 PE=3 SV=1	2	16	43.8	23.4	RPLP1	0.534247	-0.904422
A0A087WUT6	Eukaryotic translation initiation factor 5B OS=Homo sapiens GN=EIF5B PE=1 SV=1	2	502.4	900.7	481.2		0.534251	-0.90441
B4DR48	Arginyl-tRNA--protein transferase 1 OS=Homo sapiens PE=2 SV=1	2	60.1	97.7	52.2	ATE1	0.534289	-0.904309
O00764	Pyridoxal kinase OS=Homo sapiens GN=PDXK PE=1 SV=1	2	125.8	196.5	105	PDXK	0.534351	-0.90414
O14744	Protein arginine N-methyltransferase 5 OS=Homo sapiens GN=PRMT5 PE=1 SV=4	2	640.4	582.1	311.1	PRMT5	0.534444	-0.903889
B7Z6S9	Glucosylceramidase OS=Homo sapiens PE=2 SV=1	2	61.5	192.1	102.7	GBA	0.534617	-0.903421
A8K9L8	cDNA FLJ76964, highly similar to Homo sapiens tropomodulin 2 (neuronal) (TMOD2), mRNA OS=Homo sapiens PE=2 SV=1	2	22.4	73.5	39.3	TMOD2	0.534694	-0.903215
Q8WWM7	Ataxin-2-like protein OS=Homo sapiens GN=ATXN2L PE=1 SV=2	2	122.5	205.9	110.1	ATXN2L	0.534726	-0.903129
Q9UGN5	Poly [ADP-ribose] polymerase 2 OS=Homo sapiens GN=PARP2 PE=1 SV=2	1	298.9	280.1	149.8	PARP2	0.534809	-0.902904
A0A0A0MS52	Calcium/calmodulin-dependent protein kinase (CaM kinase) II gamma, isoform CRA_a OS=Homo sapiens GN=CAMK2G PE=1 SV=1	1	332.4	311.4	166.6	CAMK2G	0.535003	-0.902381
A0A024RDE8	PDZ and LIM domain 5, isoform CRA_c OS=Homo sapiens GN=PDLIM5 PE=4 SV=1	2	767.9	1302.4	696.8	PDLIM5	0.535012	-0.902356
Q86WJ1	Chromodomain-helicase-DNA-binding protein 1-like OS=Homo sapiens GN=CHD1L PE=1 SV=2	1	39.4	37	19.8	CHD1L	0.535135	-0.902025
Q59EG8	Proteasome 26S non-ATPase subunit 2 variant (Fragment) OS=Homo sapiens PE=2 SV=1	2	716.9	1369.3	733.1	PSMD2	0.535383	-0.901357
A0A024R1T2	Keratin, hair, acidic, 5, isoform CRA_a OS=Homo sapiens GN=KRTHA5 PE=3 SV=1	2	336.8	2.8	1.5	KRT35	0.535714	-0.900464
A0A1V1FWL6	Tuberin OS=Homo sapiens GN=TSC2 PE=2 SV=1	2	13.7	34.5	18.5	TSC2	0.536232	-0.899071
Q9NYU2	UDP-glucose:glycoprotein glucosyltransferase 1 OS=Homo sapiens GN=UGGT1 PE=1 SV=3	2	626.4	1600.4	858.4	UGGT1	0.536366	-0.898711
P17040	Zinc finger and SCAN domain-containing protein 20 OS=Homo sapiens GN=ZSCAN20 PE=2 SV=3	2	9.3	15.1	8.1	ZSCAN20	0.536424	-0.898555
V9HW09	Epididymis secretory sperm binding protein Li 91n OS=Homo sapiens GN=HEL-S-91n PE=2 SV=1	2	100.9	196.1	105.2	PSMD8	0.536461	-0.898455
Q9BX40	Protein LSM14 homolog B OS=Homo sapiens GN=LSM14B PE=1 SV=1	1	6.9	19	10.2	LSM14B	0.536842	-0.89743
O00154	Cytosolic acyl coenzyme A thioester hydrolase OS=Homo sapiens GN=ACOT7 PE=1 SV=3	2	68.7	122.3	65.7	ACOT7	0.537204	-0.896459
Q9BVM2	Protein DPCD OS=Homo sapiens GN=DPCD PE=1 SV=2	2	11.8	38.9	20.9	DPCD	0.537275	-0.896267
Q9BZR9	Probable E3 ubiquitin-protein ligase TRIM8 OS=Homo sapiens GN=TRIM8 PE=1 SV=2	2	58.7	104	55.9	TRIM8	0.5375	-0.895663
Q8IWZ3	Ankyrin repeat and KH domain-containing protein 1 OS=Homo sapiens GN=ANKHD1 PE=1 SV=1	2	36.1	98.6	53	ANKHD1; ANKHD1-EIF4EBP3	0.537525	-0.895595
F8VVA7	Coatomer subunit zeta-1 OS=Homo sapiens GN=COPZ1 PE=1 SV=1	2	16	33.1	17.8		0.537764	-0.894954
Q8N5N7	39S ribosomal protein L50, mitochondrial OS=Homo sapiens GN=MRPL50 PE=1 SV=2	2	15.7	26.2	14.1	MRPL50	0.538168	-0.893872
A8K666	cDNA FLJ75460, highly similar to Homo sapiens phenylalanine-tRNA synthetase-like, beta subunit, mRNA OS=Homo sapiens PE=2 SV=1	2	423.8	632.4	340.4	FARSB	0.538267	-0.893606
A0A024RDJ4	Nuclear factor of kappa light polypeptide gene enhancer in B-cells 1 (P105), isoform CRA_b OS=Homo sapiens GN=NFKB1 PE=4 SV=1	2	104.3	146.2	78.7	NFKB1	0.538304	-0.893508
A0A140VJR2	Testicular tissue protein Li 138 OS=Homo sapiens PE=2 SV=1	2	66.2	108.3	58.3	PEPD	0.538319	-0.893465
A0A0A0MRC4	G-protein-signaling modulator 1 OS=Homo sapiens GN=GPSM1 PE=1 SV=2	2	8.2	13	7	GPSM1	0.538462	-0.893085
A2RUM7	Ribosomal protein L5 OS=Homo sapiens GN=RPL5 PE=2 SV=1	2	558.8	1187.6	639.5	RPL5	0.538481	-0.893033
Q8NFD5	AT-rich interactive domain-containing protein 1B OS=Homo sapiens GN=ARID1B PE=1 SV=2	1	113.9	175.3	94.5	ARID1B	0.539076	-0.89144
D3DNI2	Profilin (Fragment) OS=Homo sapiens GN=PFN2 PE=3 SV=1	2	129.3	225.6	121.7	PFN2	0.53945	-0.890438
V5YQU3	FGFR2-BICC1 fusion kinase protein OS=Homo sapiens GN=FGFR2-BICC1 PE=2 SV=1	2	6.3	13.9	7.5	BICC1	0.539568	-0.890122
A0A024R152	HCG28765, isoform CRA_b OS=Homo sapiens GN=hCG_28765 PE=4 SV=1	1	49.4	74.1	40	PALM2-AKAP2	0.539811	-0.889474
Q15020	Squamous cell carcinoma antigen recognized by T-cells 3 OS=Homo sapiens GN=SART3 PE=1 SV=1	2	105.9	180.9	97.7	SART3	0.540077	-0.888762
B2RCM2	cDNA, FLJ96156, highly similar to Homo sapiens leucyl-tRNA synthetase (LARS), mRNA OS=Homo sapiens PE=2 SV=1	2	274.1	457.5	247.1	LARS	0.540109	-0.888677
M0R2C6	Uncharacterized protein (Fragment) OS=Homo sapiens PE=4 SV=1	2	27.7	46.1	24.9		0.54013	-0.888621
Q8IZD4	mRNA-decapping enzyme 1B OS=Homo sapiens GN=DCP1B PE=1 SV=2	1	19.5	36.1	19.5	DCP1B	0.540166	-0.888525
Q01085	Nucleolysin TIAR OS=Homo sapiens GN=TIAL1 PE=1 SV=1	2	853.5	2004	1082.9	TIAL1	0.540369	-0.887982
D6RER5	Septin-11 OS=Homo sapiens GN=SEPT11 PE=1 SV=1	2	463.6	628.9	340		0.540626	-0.887296
Q14315	Filamin-C OS=Homo sapiens GN=FLNC PE=1 SV=3	2	5776.8	6453.8	3491.7	FLNC	0.54103	-0.886219
A0A024R101	Spermatogenesis associated, serine-rich 2, isoform CRA_a OS=Homo sapiens GN=SPATS2 PE=4 SV=1	2	88.7	170.4	92.2	SPATS2	0.54108	-0.886087
A0A024R1A4	Ubiquitin-conjugating enzyme E2L 3, isoform CRA_a OS=Homo sapiens GN=UBE2L3 PE=3 SV=1	2	348.5	636.8	344.6	UBE2L3	0.541143	-0.885918
Q9BVG8	Kinesin-like protein KIFC3 OS=Homo sapiens GN=KIFC3 PE=1 SV=4	2	29.6	99	53.6	KIFC3	0.541414	-0.885196
A0A0A0MT49	Transcription activator BRG1 OS=Homo sapiens GN=SMARCA4 PE=1 SV=1	2	311.8	548	296.8		0.541606	-0.884685
P36957	Dihydrolipoyllysine-residue succinyltransferase component of 2-oxoglutarate dehydrogenase complex, mitochondrial OS=Homo sapiens GN=DLST PE=1 SV=4	2	157.1	342.2	185.5	DLST	0.542081	-0.883421
Q6IPI1	60S ribosomal protein L29 OS=Homo sapiens GN=RPL29 PE=2 SV=1	2	196.1	474.6	257.3	RPL29	0.542141	-0.883261
A0A0A0MRH8	Chromodomain-helicase-DNA-binding protein 1-like OS=Homo sapiens GN=CHD1L PE=1 SV=1	1	69	116.9	63.4	LOC101060601; CHD1L	0.542344	-0.88272
A0A024RCR2	GNL1 OS=Homo sapiens GN=GNL1 PE=4 SV=1	2	41.9	75.4	40.9	GNL1	0.54244	-0.882464
Q96QR8	Transcriptional activator protein Pur-beta OS=Homo sapiens GN=PURB PE=1 SV=3	2	97.9	286.1	155.2	PURB	0.542468	-0.882391
A0A0S2Z3L2	ATPase Ca++ transporting cardiac muscle slow twitch 2 isoform 1 (Fragment) OS=Homo sapiens GN=ATP2A2 PE=2 SV=1	2	428.9	927.2	503	ATP2A2	0.542494	-0.882322
Q08211	ATP-dependent RNA helicase A OS=Homo sapiens GN=DHX9 PE=1 SV=4	2	1125	2558	1388.3	DHX9	0.542729	-0.881697
P35659	Protein DEK OS=Homo sapiens GN=DEK PE=1 SV=1	2	228.6	401.6	218	DEK	0.542829	-0.881431
B2RBE5	cDNA, FLJ95468, highly similar to Homo sapiens transcriptional coactivator tubedown-100 (TBDN100),transcript variant 1, mRNA OS=Homo sapiens PE=2 SV=1	2	224	351.3	190.7	NAA15	0.542841	-0.881399
A0AVT1	Ubiquitin-like modifier-activating enzyme 6 OS=Homo sapiens GN=UBA6 PE=1 SV=1	2	130.9	178.5	96.9	UBA6	0.542857	-0.881356
Q13131	5'-AMP-activated protein kinase catalytic subunit alpha-1 OS=Homo sapiens GN=PRKAA1 PE=1 SV=4	2	263	381.8	207.3	PRKAA1	0.542954	-0.881097
V9HWK0	Signal recognition particle subunit SRP72 OS=Homo sapiens GN=HEL103 PE=2 SV=1	2	292.4	595.7	323.6	SRP72	0.543226	-0.880374
A0A0A0MTH3	Integrin-linked protein kinase OS=Homo sapiens GN=ILK PE=1 SV=1	2	28.7	45.1	24.5		0.543237	-0.880346
Q9H2M9	Rab3 GTPase-activating protein non-catalytic subunit OS=Homo sapiens GN=RAB3GAP2 PE=1 SV=1	2	225.1	270.4	146.9	RAB3GAP2	0.543269	-0.880261
P34897	Serine hydroxymethyltransferase, mitochondrial OS=Homo sapiens GN=SHMT2 PE=1 SV=3	2	502.8	839.1	456.1	SHMT2	0.543559	-0.879493
X5DR09	General transcription factor IIi isoform A (Fragment) OS=Homo sapiens GN=GTF2I PE=2 SV=1	2	406.5	304.5	165.6	GTF2I	0.543842	-0.87874
A8K6K2	cDNA FLJ75877, highly similar to Homo sapiens 5'-nucleotidase, cytosolic II (NT5C2), mRNA OS=Homo sapiens PE=2 SV=1	2	107.3	114.7	62.4	NT5C2	0.544028	-0.878247
Q5U5Z3	Paraneoplastic antigen MA2 OS=Homo sapiens GN=PNMA2 PE=2 SV=1	2	232.5	338.7	184.3	PNMA2	0.544139	-0.877952
A4D0W0	LSM8 homolog, U6 small nuclear RNA associated (S. cerevisiae) OS=Homo sapiens GN=LSM8 PE=2 SV=1	2	13.7	16.9	9.2	NAA38; LSM8	0.544379	-0.877317
Q9BRR0	Zinc finger protein with KRAB and SCAN domains 3 OS=Homo sapiens GN=ZKSCAN3 PE=1 SV=2	1	20.9	34.9	19	ZKSCAN3	0.544413	-0.877228
A0A1W2PNV4	Uncharacterized protein OS=Homo sapiens PE=4 SV=1	2	335.7	433.2	235.9		0.544552	-0.876858
P56537	Eukaryotic translation initiation factor 6 OS=Homo sapiens GN=EIF6 PE=1 SV=1	2	154.7	273.8	149.1	EIF6	0.544558	-0.876842
Q9Y3D9	28S ribosomal protein S23, mitochondrial OS=Homo sapiens GN=MRPS23 PE=1 SV=2	2	54	112	61	MRPS23	0.544643	-0.876618
A0A024R098	Adenosine monophosphate deaminase 2 (Isoform L), isoform CRA_c OS=Homo sapiens GN=AMPD2 PE=4 SV=1	2	55.3	87.2	47.5	AMPD2	0.544725	-0.876401
Q9UJP4	Kelch-like protein 21 OS=Homo sapiens GN=KLHL21 PE=1 SV=4	1	7.8	14.5	7.9	KLHL21	0.544828	-0.876128
A0A024R233	Tight junction protein 2 (Zona occludens 2), isoform CRA_a OS=Homo sapiens GN=TJP2 PE=4 SV=1	2	324.7	417.2	227.4	TJP2	0.545062	-0.875507
B4E1B2	cDNA FLJ53691, highly similar to Serotransferrin OS=Homo sapiens PE=2 SV=1	2	20.5	34.3	18.7	TF	0.54519	-0.87517
O43491	Band 4.1-like protein 2 OS=Homo sapiens GN=EPB41L2 PE=1 SV=1	2	85.2	147.4	80.4	EPB41L2	0.545455	-0.874469
A0A024R7X0	ADP-ribosylation factor guanine nucleotide-exchange factor 1(Brefeldin A-inhibited), isoform CRA_a OS=Homo sapiens GN=ARFGEF1 PE=4 SV=1	2	60.7	111.1	60.6	ARFGEF1	0.545455	-0.874469
[truncated: 1,607 more rows]
