# Supplementary figures and images for: Dynein-2 intermediate chains play crucial but distinct roles in primary cilia formation and function
Source: eLife journal article supplement (doi:10.7554/elife.39655), 2018-10-15

Figure 1-Figure Supplement 2

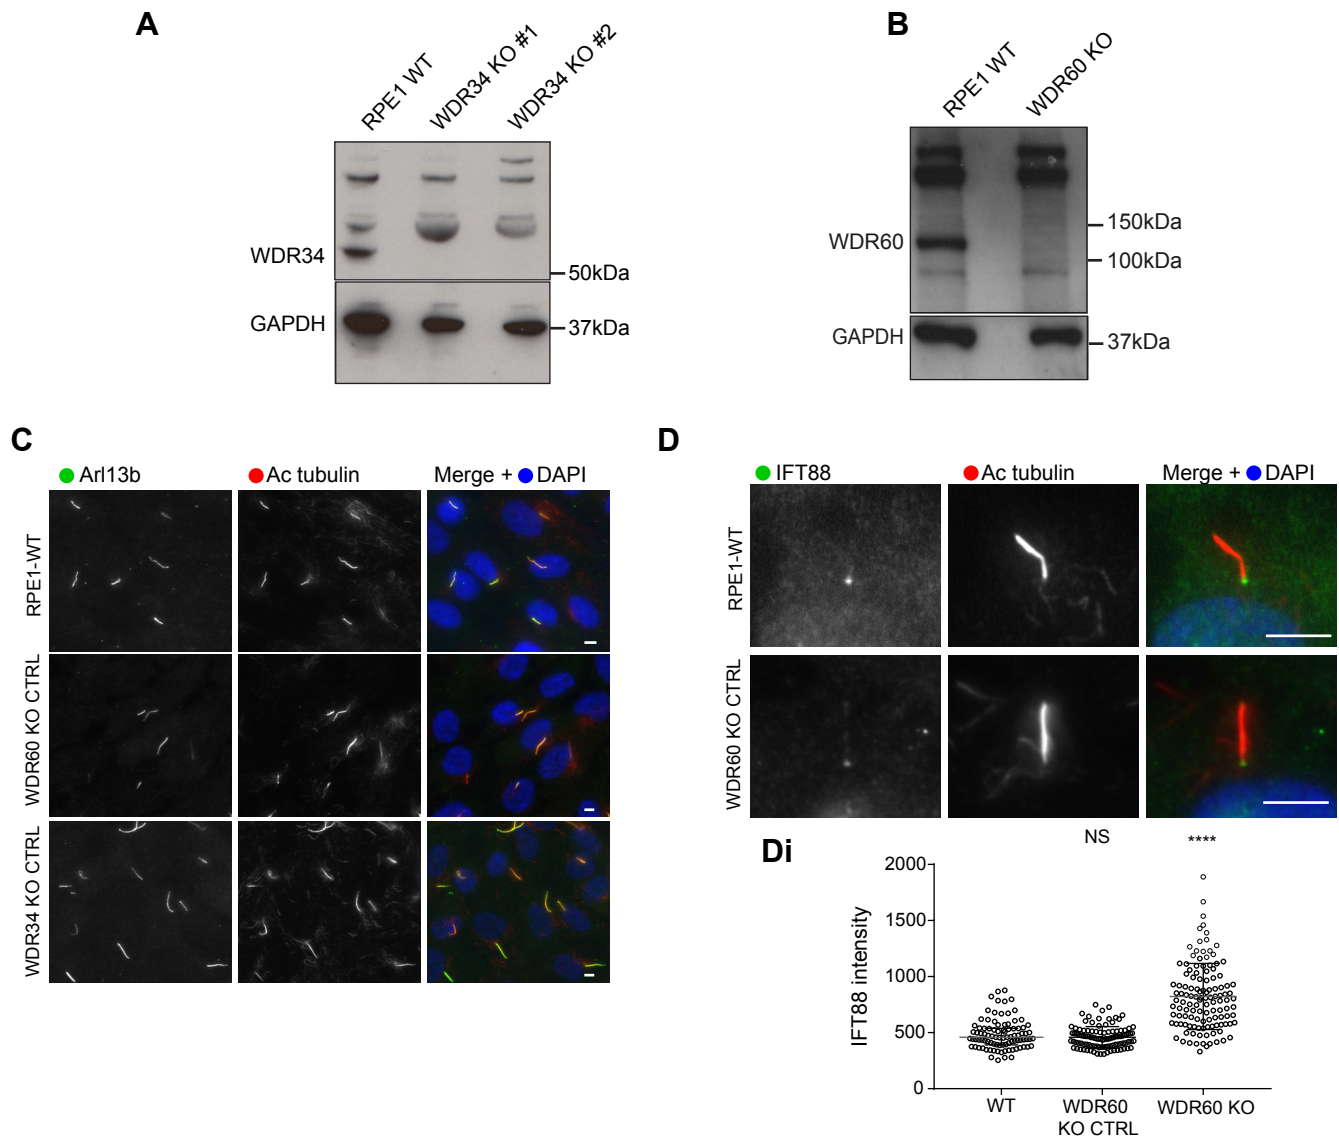

Supplement: supp [file elife-39655-supp-v1.zip]

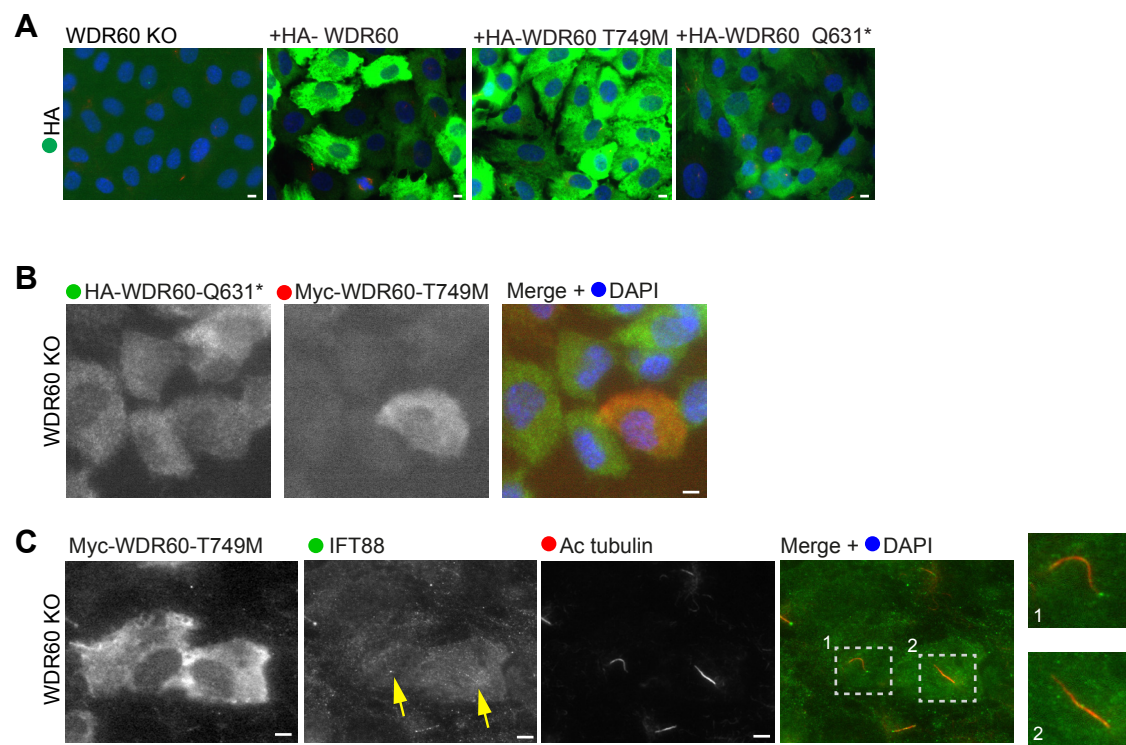

Supplement: supp [file elife-39655-supp-v1.zip]

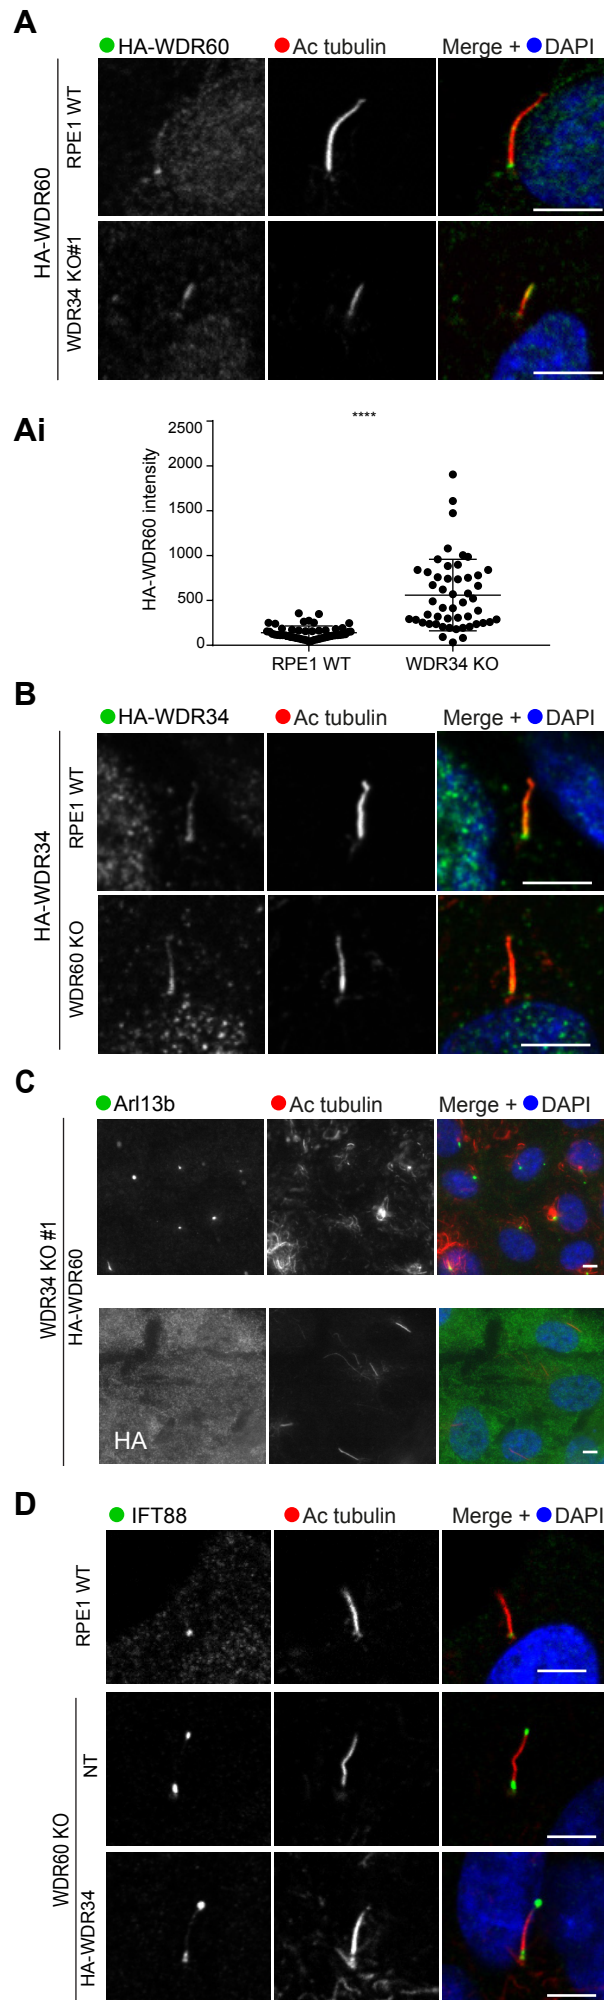

Supplement: supp [file elife-39655-supp-v1.zip]

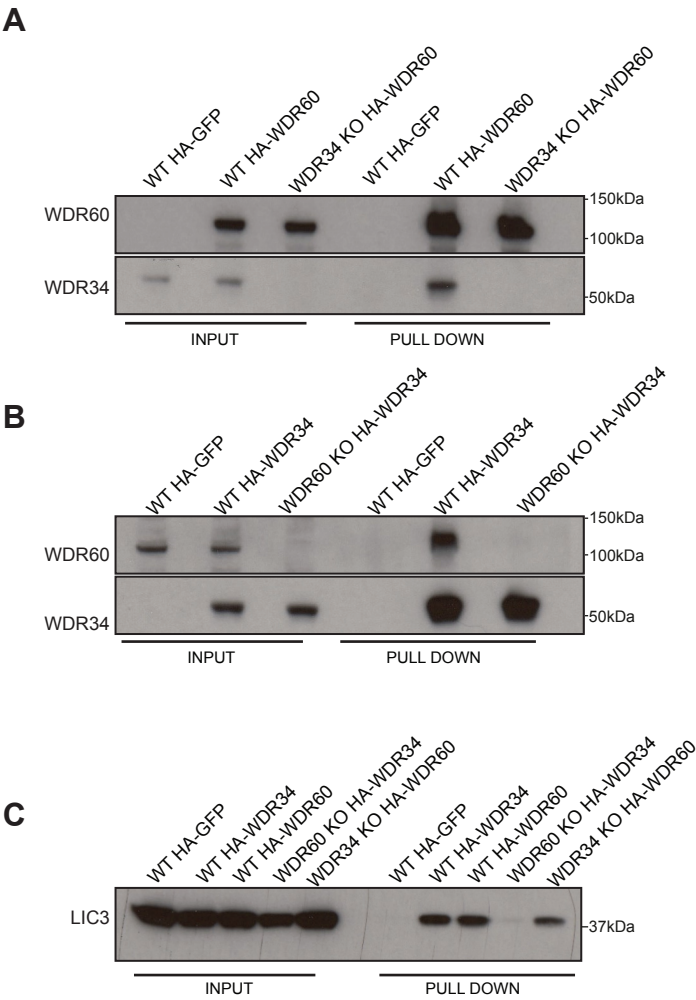

Supplement: supp [file elife-39655-supp-v1.zip]

A

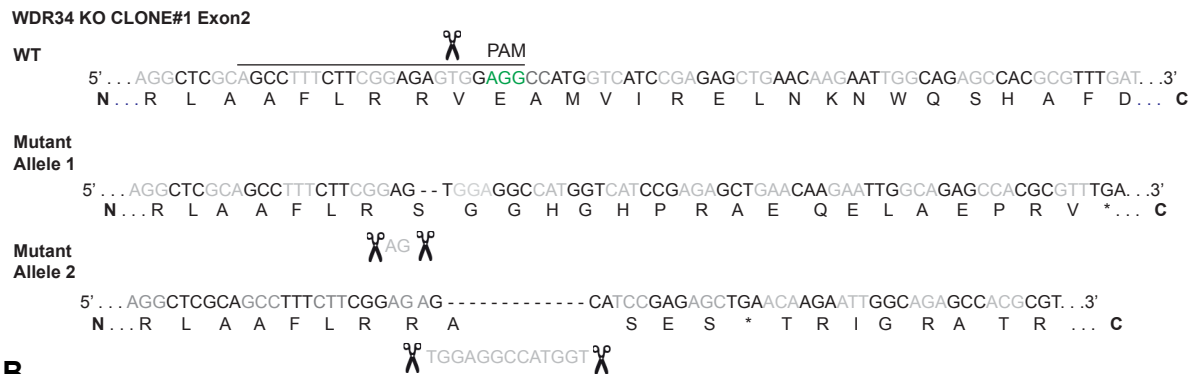

B

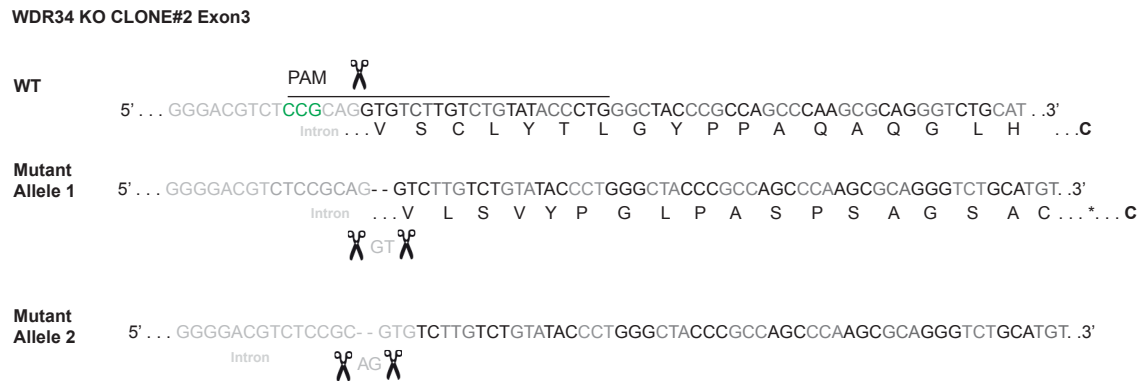

C

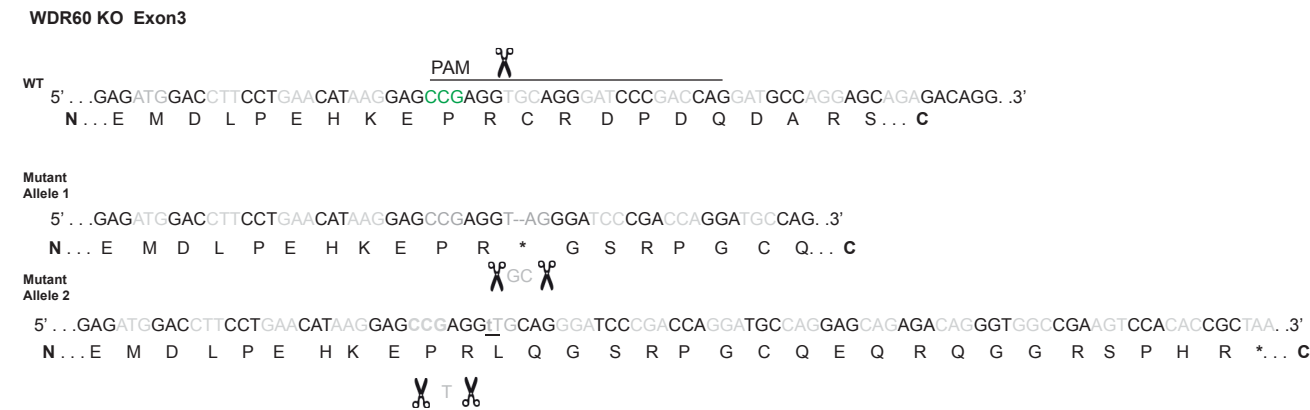

D

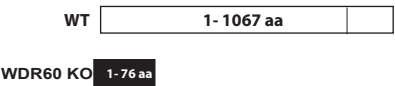

E

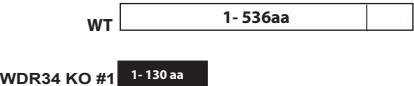

\* = Stop codon  
Underlined = inserted base (lowercase)  
Dashes = missing bases

Supplement: supp [file elife-39655-supp-v1.zip]
